# Supplementary material
Source: PubMed Central journal article supplement (PMC6980284)
Supplement: NIHMS1052898-supplement-Supplemental_Table_1.pdf [file NIHMS1052898-supplement-Supplemental_Table_1.pdf]

|   | A                                                                                                    | B                                                                                                | C                    | D                             | E                       | F                                                                   | G                     | H                                                                                                                                                                                                                                                                                                   | I                  | J        | K                       | L               | M                          | N                              | O                         | P                             |
|---|------------------------------------------------------------------------------------------------------|--------------------------------------------------------------------------------------------------|----------------------|-------------------------------|-------------------------|---------------------------------------------------------------------|-----------------------|-----------------------------------------------------------------------------------------------------------------------------------------------------------------------------------------------------------------------------------------------------------------------------------------------------|--------------------|----------|-------------------------|-----------------|----------------------------|--------------------------------|---------------------------|-------------------------------|
| 1 | Protein IDs                                                                                          | Majority protein IDs                                                                             | Peptide counts (all) | Peptide counts (razor+unique) | Peptide counts (unique) | Protein names                                                       | Gene names            | Fasta headers                                                                                                                                                                                                                                                                                       | Number of proteins | Peptides | Razor + unique peptides | Unique peptides | Peptides WT Pooled LPS IgG | Peptides WT Pooled LPS_ATP IgG | Peptides WT1 LPS NLRP3 IP | Peptides WT1 LPS-ATP NLRP3 IP |
| 2 | A0A140T8P9;<br>A0A075B5K0;<br>P01638;P01637                                                          | A0A140T8P9;A0<br>A075B5K0;P0163<br>8;P01637                                                      | 1;1;1;1              | 1;1;1;1                       | 1;1;1;1                 | Ig kappa chain<br>V-V region L6;Ig<br>kappa chain V-<br>V region T1 | Igkv14-126            | tr A0A140T8P9 A0A140T8P9_<br>MOUSE Immunoglobulin<br>kappa variable 14-111<br>(Fragment) OS=Mus musculus<br>OX=10090 GN=Igkv14-111<br>PE=4<br>SV=2;tr A0A075B5K0 A0A075<br>B5K0_MOUSE Immunoglobulin<br>kappa variable 14-126<br>(Fragment) OS=Mus musculus<br>OX=10090 GN=Igkv14-126<br>PE=4 SV=7; | 4                  | 1        | 1                       | 1               | 0                          | 0                              | 1                         | 1                             |
| 3 | A0A075B5N4;<br>A0A140T8P7;<br>A0A0G2JF28;A<br>0A140T8P5;A<br>0A140T8M3;A<br>0A075B5N3;A<br>0A0G2JE47 | A0A075B5N4;A0<br>A140T8P7;A0A0<br>G2JF28;A0A140T<br>8P5;A0A140T8M<br>3;A0A075B5N3;<br>A0A0G2JE47 | 2;2;2;2;2;1;<br>1    | 2;2;2;2;2;1;<br>1             | 2;2;2;2;2;1;<br>1       | Igkv8-<br>27;lgkv8-28                                               | Igkv8-<br>27;lgkv8-28 | tr A0A075B5N4 A0A075B5N4_<br>MOUSE Immunoglobulin<br>kappa chain variable 8-27<br>OS=Mus musculus OX=10090<br>GN=lgkv8-27 PE=4<br>SV=1;tr A0A140T8P7 A0A140T<br>8P7_MOUSE Immunoglobulin<br>kappa variable 8-21<br>(Fragment) OS=Mus musculus<br>OX=10090 GN=lgkv8-21 PE=1<br>SV=2;tr A0A0G2JF28    | 7                  | 2        | 2                       | 2               | 2                          | 2                              | 0                         | 0                             |
| 4 | A0A075B5N5                                                                                           | A0A075B5N5                                                                                       | 1                    | 1                             | 1                       |                                                                     | Igkv8-26              | tr A0A075B5N5 A0A075B5N5_<br>MOUSE Immunoglobulin<br>kappa variable 8-26<br>(Fragment) OS=Mus musculus<br>OX=10090 GN=lgkv8-26 PE=4<br>SV=7                                                                                                                                                         | 1                  | 1        | 1                       | 1               | 1                          | 0                              | 0                         | 0                             |
| 5 | A0A075B5P4;<br>A0A0A6YWR2                                                                            | A0A075B5P4;A0<br>A0A6YWR2                                                                        | 9;9                  | 1;1                           | 1;1                     |                                                                     | Ighg1                 | tr A0A075B5P4 A0A075B5P4_<br>MOUSE Ig gamma-1 chain C<br>region secreted form<br>(Fragment) OS=Mus musculus<br>OX=10090 GN=Ighg1 PE=1<br>SV=1;tr A0A0A6YWR2 A0A0A<br>6YWR2_MOUSE Ig gamma-1<br>chain C region secreted form<br>(Fragment) OS=Mus musculus<br>OX=10090 GN=Ighg1 PE=1<br>SV=1         | 2                  | 9        | 1                       | 1               | 8                          | 9                              | 0                         | 1                             |

|   | A                                                                                                  | B                                                                                   | C                     | D                     | E                     | F                                                                                                                        | G                       | H                                                                                                                                                                                                                                                                                                    | I | J | K | L | M | N | O | P |
|---|----------------------------------------------------------------------------------------------------|-------------------------------------------------------------------------------------|-----------------------|-----------------------|-----------------------|--------------------------------------------------------------------------------------------------------------------------|-------------------------|------------------------------------------------------------------------------------------------------------------------------------------------------------------------------------------------------------------------------------------------------------------------------------------------------|---|---|---|---|---|---|---|---|
| 6 | A0A087WNW<br>2;E9Q171;A0A<br>087WR56;E9P<br>W06;A0A087<br>WPX3;Q810U                               | A0A087WNW2;E<br>9Q171;A0A087<br>WR56;E9PW06;<br>A0A087WPX3;Q<br>810U3               | 1;1;1;1;1;1           | 1;1;1;1;1;1           | 1;1;1;1;1;1           | Neurofascin                                                                                                              | Nfasc                   | tr A0A087WNW2 A0A087WN<br>W2_MOUSE Neurofascin<br>OS=Mus musculus OX=10090<br>GN=Nfasc PE=1<br>SV=1;tr E9Q171 E9Q171_MO<br>USE Neurofascin OS=Mus<br>musculus OX=10090 GN=Nfasc<br>PE=1<br>SV=1;tr A0A087WR56 A0A087<br>WR56_MOUSE Neurofascin<br>(Fragment) OS=Mus musculus<br>OX=10090 GN=Nfasc PE | 6 | 1 | 1 | 1 | 0 | 0 | 1 | 0 |
| 7 | J3QPQ6;A0A0<br>87WPA0                                                                              | J3QPQ6;A0A087<br>WPA0                                                               | 1;1                   | 1;1                   | 1;1                   |                                                                                                                          | Lbhd1                   | tr J3QPQ6 J3QPQ6_MOUSE<br>Predicted gene, 49403 OS=Mus<br>musculus OX=10090<br>GN=Gm49403 PE=4<br>SV=1;tr A0A087WPA0 A0A087<br>WPA0_MOUSE LBH domain-<br>containing 1 OS=Mus musculus<br>OX=10090 GN=Lbhd1 PE=4<br>SV=1                                                                              | 2 | 1 | 1 | 1 | 0 | 0 | 0 | 1 |
| 8 | S4R257;S4R1<br>W1;A0A0A0M<br>QF6;P16858;A<br>0A1D5RLD8;A<br>0A0R4J0X7;S4<br>R2G5;Q64467;<br>S4R1W8 | S4R257;S4R1W1;<br>A0A0A0MQF6;P<br>16858;A0A1D5R<br>LD8;A0A0R4J0X7<br>;S4R2G5;Q64467 | 4;4;4;4;3;2;<br>2;2;1 | 4;4;4;4;3;2;<br>2;2;1 | 4;4;4;4;3;2;<br>2;2;1 | Glyceraldehyde-<br>3-phosphate<br>dehydrogenase<br>;Glyceraldehyd<br>e-3-phosphate<br>dehydrogenase<br>, testis-specific | Gapdh;Gm38<br>39;Gapdhs | tr S4R257 S4R257_MOUSE<br>Glyceraldehyde-3-phosphate<br>dehydrogenase (Fragment)<br>OS=Mus musculus OX=10090<br>GN=Gapdh PE=1<br>SV=1;tr S4R1W1 S4R1W1_MO<br>USE Glyceraldehyde-3-<br>phosphate dehydrogenase<br>OS=Mus musculus OX=10090<br>GN=Gm3839 PE=1<br>SV=1;tr A0A0A0MQF6 A0A0A<br>0MQF6_MOU | 9 | 4 | 4 | 4 | 0 | 1 | 2 | 2 |
| 9 | A0A0A6YVN9;<br>P29387                                                                              | A0A0A6YVN9;P2<br>9387                                                               | 1;1                   | 1;1                   | 1;1                   | Guanine<br>nucleotide-<br>binding protein<br>subunit beta-4                                                              | Gnb4                    | tr A0A0A6YVN9 A0A0A6YVN9<br>_MOUSE Guanine nucleotide-<br>binding protein subunit beta-4<br>OS=Mus musculus OX=10090<br>GN=Gnb4 PE=1<br>SV=1;sp P29387 GBB4_MOUS<br>E Guanine nucleotide-binding<br>protein subunit beta-4<br>OS=Mus musculus OX=10090<br>GN=Gnb4 PE=1 SV=4                          | 2 | 1 | 1 | 1 | 1 | 0 | 0 | 0 |



|    | A                                                                            | B                                  | C             | D             | E             | F                                                     | G           | H                                                                                                                                                                                                                                                                  | I | J | K | L | M | N | O | P |
|----|------------------------------------------------------------------------------|------------------------------------|---------------|---------------|---------------|-------------------------------------------------------|-------------|--------------------------------------------------------------------------------------------------------------------------------------------------------------------------------------------------------------------------------------------------------------------|---|---|---|---|---|---|---|---|
| 13 | A0A0A6YY53;<br>F6TQW2;P01864;<br>A0A075B5P3;<br>A0A0A6YVPO;<br>P01863;P01865 | A0A0A6YY53;F6TQW2;P01864           | 8;8;5;1;1;1;1 | 8;8;5;1;1;1;1 | 8;8;5;1;1;1;1 | lg gamma-2A chain C region secreted form              | Ighg2c      | tr A0A0A6YY53 A0A0A6YY53_MOUSE Immunoglobulin heavy constant gamma 2C (Fragment) OS=Mus musculus OX=10090 GN=Ighg2c PE=1 SV=1;tr F6TQW2 F6TQW2_MOUSE Immunoglobulin heavy constant gamma 2C (Fragment) OS=Mus musculus OX=10090 GN=Ighg2c PE=1 SV=2;sp P01864 GC   | 7 | 8 | 8 | 8 | 0 | 1 | 8 | 7 |
| 14 | A0A0G2JDF1;<br>A0A0G2JDN3                                                    | A0A0G2JDF1;A0A0G2JDN3              | 1;1           | 1;1           | 1;1           |                                                       |             | tr A0A0G2JDF1 A0A0G2JDF1_MOUSE Serrate RNA effector molecule homolog (Fragment) OS=Mus musculus OX=10090 GN=Srrt PE=1 SV=1;tr A0A0G2JDN3 A0A0G2JDN3_MOUSE Serrate RNA effector molecule homolog OS=Mus musculus OX=10090 GN=Srrt PE=1 SV=1                         | 2 | 1 | 1 | 1 | 0 | 0 | 1 | 0 |
| 15 | A0A1W2P777;<br>A0A0G2JDL9;<br>Q99JI6;P6283                                   | A0A1W2P777;A0A0G2JDL9;Q99JI6;P6283 | 1;1;1;1       | 1;1;1;1       | 1;1;1;1       | Ras-related protein Rap-1b;Ras-related protein Rap-1A | Rap1b;Rap1a | tr A0A1W2P777 A0A1W2P777_MOUSE Ras-related protein Rap-1b (Fragment) OS=Mus musculus OX=10090 GN=Rap1b PE=1 SV=1;tr A0A0G2JDL9 A0A0G2JDL9_MOUSE MCG10748, isoform CRA_b OS=Mus musculus OX=10090 GN=Rap1a PE=1 SV=1;sp Q99JI6 RAP1B_MOUSE E Ras-related protein Ra | 4 | 1 | 1 | 1 | 0 | 0 | 1 | 0 |

|    | A                                                   | B                                               | C       | D       | E       | F                                                | G         | H                                                                                                                                                                                                                                                                                                    | I | J | K | L | M | N | O | P |
|----|-----------------------------------------------------|-------------------------------------------------|---------|---------|---------|--------------------------------------------------|-----------|------------------------------------------------------------------------------------------------------------------------------------------------------------------------------------------------------------------------------------------------------------------------------------------------------|---|---|---|---|---|---|---|---|
| 16 | A0A0G2JE63;<br>A0A0G2JEY3;<br>A0A0G2JGY6;<br>Q7TT00 | A0A0G2JE63;A0<br>A0G2JEY3;A0A0<br>G2JGY6;Q7TT00 | 1;1;1;1 | 1;1;1;1 | 1;1;1;1 | Transcription<br>factor SPT20<br>homolog         | Supt20h   | tr A0A0G2JE63 A0A0G2JE63_<br>MOUSE Suppressor of Ty 20<br>(Fragment) OS=Mus musculus<br>OX=10090 GN=Supt20 PE=1<br>SV=1;tr A0A0G2JEY3 A0A0G2J<br>EY3_MOUSE Suppressor of Ty<br>20 OS=Mus musculus<br>OX=10090 GN=Supt20 PE=1<br>SV=1;tr A0A0G2JGY6 A0A0G2J<br>GY6_MOUSE Suppressor of Ty<br>20 OS    | 4 | 1 | 1 | 1 | 0 | 0 | 1 | 0 |
| 17 | A0A0G2JEK1;<br>Q8CBQ5                               | A0A0G2JEK1;Q8<br>CBQ5                           | 1;1     | 1;1     | 1;1     | Phosphatidylin<br>ositol 4-kinase<br>type 2-beta | Pi4k2b    | tr A0A0G2JEK1 A0A0G2JEK1_<br>MOUSE Phosphatidylinositol 4-<br>kinase type 2-beta OS=Mus<br>musculus OX=10090<br>GN=Pi4k2b PE=1<br>SV=1;sp Q8CBQ5 P4K2B_MO<br>USE Phosphatidylinositol 4-<br>kinase type 2-beta OS=Mus<br>musculus OX=10090<br>GN=Pi4k2b PE=1 SV=1                                    | 2 | 1 | 1 | 1 | 0 | 0 | 0 | 1 |
| 18 | F7A4H5;A0A0<br>G2JEM5                               | F7A4H5;A0A0G2<br>JEM5                           | 1;1     | 1;1     | 1;1     |                                                  | D3Ert254e | tr F7A4H5 F7A4H5_MOUSE<br>DNA segment, Chr 3, ERATO<br>Doi 254,-expressed OS=Mus<br>musculus OX=10090<br>GN=D3Ert254e PE=4<br>SV=1;tr A0A0G2JEM5 A0A0G2<br>JEM5_MOUSE DNA segment,<br>Chr 3, ERATO Doi 254,-<br>expressed OS=Mus musculus<br>OX=10090 GN=D3Ert254e<br>PE=4 SV=1                      | 2 | 1 | 1 | 1 | 1 | 0 | 1 | 0 |
| 19 | A0A0G2JEU1;<br>P47738;A0A0<br>G2JFQ0;A0A0<br>G2JF60 | A0A0G2JEU1;P4<br>7738;A0A0G2JF<br>Q0            | 4;4;2;1 | 4;4;2;1 | 4;4;2;1 | Aldehyde<br>dehydrogenase<br>, mitochondrial     | Aldh2     | tr A0A0G2JEU1 A0A0G2JEU1_<br>MOUSE Aldehyde<br>dehydrogenase, mitochondrial<br>OS=Mus musculus OX=10090<br>GN=Aldh2 PE=1<br>SV=1;sp P47738 ALDH2_MO<br>USE Aldehyde dehydrogenase,<br>mitochondrial OS=Mus<br>musculus OX=10090 GN=Aldh2<br>PE=1<br>SV=1;tr A0A0G2JFQ0 A0A0G2J<br>FQ0_MOUSE Aldehyde | 4 | 4 | 4 | 4 | 0 | 0 | 4 | 1 |

|    | A                                                                                                                                                                                                             | B                                                                                                                                                                                                                                               | C                                                                                                           | D                                                                                                           | E                                                                                                           | F                                                                                                                                                                                          | G                                                                                                                                       | H                                                                                                                                                                                                                                                                                                    | I  | J | K | L | M | N | O | P |
|----|---------------------------------------------------------------------------------------------------------------------------------------------------------------------------------------------------------------|-------------------------------------------------------------------------------------------------------------------------------------------------------------------------------------------------------------------------------------------------|-------------------------------------------------------------------------------------------------------------|-------------------------------------------------------------------------------------------------------------|-------------------------------------------------------------------------------------------------------------|--------------------------------------------------------------------------------------------------------------------------------------------------------------------------------------------|-----------------------------------------------------------------------------------------------------------------------------------------|------------------------------------------------------------------------------------------------------------------------------------------------------------------------------------------------------------------------------------------------------------------------------------------------------|----|---|---|---|---|---|---|---|
| 20 | A0A0G2JF30;<br>G3UW75;Q8B<br>UL5                                                                                                                                                                              | A0A0G2JF30;G3<br>UW75;Q8BUL5                                                                                                                                                                                                                    | 1;1;1                                                                                                       | 1;1;1                                                                                                       | 1;1;1                                                                                                       | Kelch-like<br>protein 7                                                                                                                                                                    | Klhl7                                                                                                                                   | tr A0A0G2JF30 A0A0G2JF30_<br>MOUSE Kelch-like 7<br>(Drosophila), isoform CRA_c<br>OS=Mus musculus OX=10090<br>GN=Klhl7 PE=1<br>SV=1;tr G3UW75 G3UW75_M<br>OUSE Kelch-like 7 (Drosophila),<br>isoform CRA_a OS=Mus<br>musculus OX=10090 GN=Klhl7<br>PE=1<br>SV=1;sp Q8BUL5 KLHL7_MOU<br>SE Kelch-like | 3  | 1 | 1 | 1 | 1 | 0 | 0 | 0 |
| 21 | A0A0G2JGC1;<br>A0A0G2JFF1;P<br>63087;P62141<br>7;P62137                                                                                                                                                       | A0A0G2JGC1;A0<br>A0G2JFF1;P6308<br>7;P62141;P6213<br>7                                                                                                                                                                                          | 1;1;1;1;1                                                                                                   | 1;1;1;1;1                                                                                                   | 1;1;1;1;1                                                                                                   | Serine/threoni<br>ne-protein<br>phosphatase<br>PP1-gamma<br>catalytic<br>subunit;Serine/<br>threonine-<br>protein<br>phosphatase<br>PP1-beta<br>catalytic<br>subunit;Serine/<br>threonine- | Ppp1cc;Ppp1<br>cb;Ppp1ca                                                                                                                | tr A0A0G2JGC1 A0A0G2JGC1_<br>MOUSE Serine/threonine-<br>protein phosphatase OS=Mus<br>musculus OX=10090<br>GN=Ppp1cc PE=1<br>SV=1;tr A0A0G2JFF1 A0A0G2J<br>FF1_MOUSE Serine/threonine-<br>protein phosphatase<br>(Fragment) OS=Mus musculus<br>OX=10090 GN=Ppp1cc PE=1<br>SV=1;sp P63087 PP1G_MOUS   | 5  | 1 | 1 | 1 | 0 | 0 | 1 | 0 |
| 22 | A0A0N4SV29;<br>Q80V62                                                                                                                                                                                         | A0A0N4SV29;Q8<br>0V62                                                                                                                                                                                                                           | 1;1                                                                                                         | 1;1                                                                                                         | 1;1                                                                                                         | Fanconi<br>anemia group<br>D2 protein<br>homolog                                                                                                                                           | Fancd2                                                                                                                                  | tr A0A0N4SV29 A0A0N4SV29_<br>MOUSE Fanconi anemia group<br>D2 protein homolog OS=Mus<br>musculus OX=10090<br>GN=Fancd2 PE=1<br>SV=1;sp Q80V62 FACD2_MOU<br>SE Fanconi anemia group D2<br>protein homolog OS=Mus<br>musculus OX=10090<br>GN=Fancd2 PE=1 SV=2                                          | 2  | 1 | 1 | 1 | 0 | 0 | 0 | 0 |
| 23 | A0A0N4SV66;<br>Q8CGP4;COHK<br>E9;COHKE8;CO<br>HKE7;COHKE6;<br>COHKE5;COHK<br>E4;COHKE3;CO<br>HKE2;COHKE1;<br>Q8CGP6;Q8R1<br>M2;Q64523;Q<br>8CGP7;Q8CGP<br>5;Q8BFU2;Q6<br>L7;Q3UA95;Q3<br>T7;G3UW75;Q8B<br>UL5 | A0A0N4SV66;Q8<br>CGP4;COHKE9;CO<br>HKE8;COHKE7;CO<br>HKE6;COHKE5;CO<br>HKE4;COHKE3;CO<br>HKE2;COHKE1;Q<br>8CGP6;Q8R1M2;<br>Q64523;Q8CGP7<br>M2;Q64523;Q<br>8CGP5;Q8BFU<br>2;Q6GSS7;G3UW<br>75;Q8BFU2;Q6<br>L7;Q3UA95;Q3<br>T7;G3UW75;Q8B<br>UL5 | 2;2;2;2;2;2;<br>2;2;2;2;2;2;<br>2;2;2;2;2;2;<br>2;2;2;2;2;2;<br>2;2;2;2;2;2;<br>2;2;2;2;2;2;<br>1;1;1;1;1;1 | 2;2;2;2;2;2;<br>2;2;2;2;2;2;<br>2;2;2;2;2;2;<br>2;2;2;2;2;2;<br>2;2;2;2;2;2;<br>2;2;2;2;2;2;<br>1;1;1;1;1;1 | 2;2;2;2;2;2;<br>2;2;2;2;2;2;<br>2;2;2;2;2;2;<br>2;2;2;2;2;2;<br>2;2;2;2;2;2;<br>2;2;2;2;2;2;<br>1;1;1;1;1;1 | Histone<br>H2A;Histone<br>H2A type 1-<br>H;Histone<br>H2A.J;Histone<br>H2A type 2-<br>C;Histone H2A<br>type 1-<br>K;Histone H2A<br>type 1-<br>F;Histone H2A<br>type 3;Histone              | Hist1h2aa;Hi<br>st1h2ah;H2af<br>j;Hist2h2ac;H<br>ist1h2ak;Hist<br>1h2af;Hist3h<br>2a;Hist2h2aa<br>1;H2afz;H2af<br>v;Hist2h2ab;<br>H2afx | tr A0A0N4SV66 A0A0N4SV66_<br>MOUSE Histone H2A OS=Mus<br>musculus OX=10090 GN=H2afj<br>PE=1<br>SV=1;tr Q8CGP4 Q8CGP4_MO<br>USE Histone H2A OS=Mus<br>musculus OX=10090<br>GN=Hist1h2aa PE=1<br>SV=1;sp COHKE9 H2A1P_MOU<br>SE Histone H2A type 1-P<br>OS=Mus musculus OX=10090<br>GN=Hist1h2ap PE=1  | 24 | 2 | 2 | 2 | 2 | 2 | 2 |   |
| 24 | A0A0N4SV90                                                                                                                                                                                                    | A0A0N4SV90                                                                                                                                                                                                                                      | 1                                                                                                           | 1                                                                                                           | 1                                                                                                           |                                                                                                                                                                                            |                                                                                                                                         | tr A0A0N4SV90 A0A0N4SV90_<br>MOUSE Pre-mRNA-splicing<br>factor ISY1 homolog<br>(Fragment) OS=Mus musculus<br>OX=10090 GN=Isy1 PE=4 SV=1                                                                                                                                                              | 1  | 1 | 1 | 1 | 0 | 1 | 0 | 0 |

|    | A                                                                                                     | B                                                                                                 | C                       | D                       | E                       | F                                                                                                         | G         | H                                                                                                                                                                                                                                                                                                    | I  | J | K | L | M | N | O | P |
|----|-------------------------------------------------------------------------------------------------------|---------------------------------------------------------------------------------------------------|-------------------------|-------------------------|-------------------------|-----------------------------------------------------------------------------------------------------------|-----------|------------------------------------------------------------------------------------------------------------------------------------------------------------------------------------------------------------------------------------------------------------------------------------------------------|----|---|---|---|---|---|---|---|
| 25 | A0A0R4J0M9;<br>Q8CDG3                                                                                 | A0A0R4J0M9;Q8<br>CDG3                                                                             | 1;1                     | 1;1                     | 1;1                     | Deubiquitinatin<br>g protein<br>VCIP135                                                                   | Vcpi1     | tr A0A0R4J0M9 A0A0R4J0M9<br>_MOUSE Deubiquitinating<br>protein VCIP135 OS=Mus<br>musculus OX=10090<br>GN=Vcpi1 PE=1<br>SV=1;sp Q8CDG3 VCIP1_MOU<br>SE Deubiquitinating protein<br>VCIP135 OS=Mus musculus<br>OX=10090 GN=Vcpi1 PE=1<br>SV=1                                                          | 2  | 1 | 1 | 1 | 0 | 0 | 0 | 1 |
| 26 | A0A0R4J1B6;<br>Q6PAL8                                                                                 | A0A0R4J1B6;Q6<br>PAL8                                                                             | 1;1                     | 1;1                     | 1;1                     | DENN domain-<br>containing<br>protein 5A                                                                  | Dennd5a   | tr A0A0R4J1B6 A0A0R4J1B6_<br>MOUSE DENN domain-<br>containing protein 5A OS=Mus<br>musculus OX=10090<br>GN=Dennd5a PE=1<br>SV=1;sp Q6PAL8 DEN5A_MO<br>USE DENN domain-containing<br>protein 5A OS=Mus musculus<br>OX=10090 GN=Dennd5a PE=1<br>SV=1                                                   | 2  | 1 | 1 | 1 | 0 | 1 | 0 | 1 |
| 27 | D3Z774;Q6AX<br>H7;A0A0R4J1<br>C0;Q61188;P7<br>0351                                                    | D3Z774;Q6AXH7<br>;A0A0R4J1C0;Q6<br>1188;P70351                                                    | 1;1;1;1;1               | 1;1;1;1;1               | 1;1;1;1;1               | Histone-lysine<br>N-<br>methyltransfer<br>ase<br>EZH2;Histone-<br>lysine N-<br>methyltransfer<br>ase EZH1 | Ezh2;Ezh1 | tr D3Z774 D3Z774_MOUSE<br>Histone-lysine N-<br>methyltransferase EZH2<br>OS=Mus musculus OX=10090<br>GN=Ezh2 PE=1<br>SV=1;tr Q6AXH7 Q6AXH7_MO<br>USE Ezh2 protein OS=Mus<br>musculus OX=10090 GN=Ezh2<br>PE=1<br>SV=1;tr A0A0R4J1C0 A0A0R4J<br>1C0_MOUSE Histone-lysine N-<br>methyltransferase EZH1 | 5  | 1 | 1 | 1 | 0 | 0 | 0 | 0 |
| 28 | A0A0R4J1C8;P<br>31996                                                                                 | A0A0R4J1C8;P31<br>996                                                                             | 1;1                     | 1;1                     | 1;1                     | Macrosialin                                                                                               | Cd68      | tr A0A0R4J1C8 A0A0R4J1C8_<br>MOUSE Macrosialin OS=Mus<br>musculus OX=10090 GN=Cd68<br>PE=1<br>SV=1;sp P31996 CD68_MOUS<br>E Macrosialin OS=Mus<br>musculus OX=10090 GN=Cd68<br>PE=1 SV=1                                                                                                             | 2  | 1 | 1 | 1 | 1 | 1 | 0 | 1 |
| 29 | D3Z7N2;D3YU<br>Q9;D3YZT9;E9<br>QN08;A0A0R4<br>J1L2;Q91VK2;<br>Q80T06;F6ZF<br>U0;A0A0R4J1<br>E2;P57776 | D3Z7N2;D3YUQ9<br>;D3YZT9;E9QN08<br>;A0A0R4J1L2;Q9<br>1VK2;Q80T06;F6<br>ZFU0;A0A0R4J1E<br>2;P57776 | 1;1;1;1;1;1;<br>1;1;1;1 | 1;1;1;1;1;1;<br>1;1;1;1 | 1;1;1;1;1;1;<br>1;1;1;1 | Elongation<br>factor 1-delta                                                                              | Eef1d     | tr D3Z7N2 D3Z7N2_MOUSE<br>Elongation factor 1-delta<br>(Fragment) OS=Mus musculus<br>OX=10090 GN=Eef1d PE=1<br>SV=1;tr D3YUQ9 D3YUQ9_MO<br>USE Elongation factor 1-delta<br>(Fragment) OS=Mus musculus<br>OX=10090 GN=Eef1d PE=1<br>SV=8;tr D3YZT9 D3YZT9_MOU<br>SE Elongation factor 1-delta        | 10 | 1 | 1 | 1 | 0 | 0 | 0 | 0 |

|    | A                                                                  | B                                                              | C         | D         | E         | F                                                       | G                 | H                                                                                                                                                                                                                                                                                                    | I | J | K | L | M | N | O | P |
|----|--------------------------------------------------------------------|----------------------------------------------------------------|-----------|-----------|-----------|---------------------------------------------------------|-------------------|------------------------------------------------------------------------------------------------------------------------------------------------------------------------------------------------------------------------------------------------------------------------------------------------------|---|---|---|---|---|---|---|---|
| 30 | A0A0U1RNR6;<br>Q6NV66                                              | A0A0U1RNR6;Q<br>6NV66                                          | 1;1       | 1;1       | 1;1       |                                                         | Zfp646            | tr A0A0U1RNR6 A0A0U1RNR6<br>_MOUSE Zinc finger protein<br>646 (Fragment) OS=Mus<br>musculus OX=10090<br>GN=Zfp646 PE=1<br>SV=1;tr Q6NV66 Q6NV66_MO<br>USE Zinc finger protein 646<br>OS=Mus musculus OX=10090<br>GN=Zfp646 PE=1 SV=1                                                                 | 2 | 1 | 1 | 1 | 0 | 1 | 0 | 0 |
| 31 | J3QPY0;A0A0<br>U1RNT4;Q8W<br>URO                                   | J3QPY0;A0A0U1<br>RNT4;Q8WURO                                   | 1;1;1     | 1;1;1     | 1;1;1     | Protein<br>C19orf12<br>homolog                          | 1600014C10<br>Rik | tr J3QPY0 J3QPY0_MOUSE<br>RIKEN cDNA 1600014C10 gene<br>OS=Mus musculus OX=10090<br>GN=1600014C10Rik PE=1<br>SV=1;tr A0A0U1RNT4 A0A0U1<br>RNT4_MOUSE RIKEN cDNA<br>1600014C10 gene OS=Mus<br>musculus OX=10090<br>GN=1600014C10Rik PE=1<br>SV=1;sp Q8WURO CS012_MO<br>USE Protein C19orf12 homol     | 3 | 1 | 1 | 1 | 0 | 1 | 0 | 0 |
| 32 | A0A0U1RP68;<br>D6RIL6;P5407<br>1                                   | A0A0U1RP68;D6<br>RIL6;P54071                                   | 1;1;1     | 1;1;1     | 1;1;1     | Isocitrate<br>dehydrogenase<br>[NADP],<br>mitochondrial | Idh2              | tr A0A0U1RP68 A0A0U1RP68<br>_MOUSE Isocitrate<br>dehydrogenase [NADP],<br>mitochondrial (Fragment)<br>OS=Mus musculus OX=10090<br>GN=ldh2 PE=1<br>SV=1;tr D6RIL6 D6RIL6_MOUS<br>E Isocitrate dehydrogenase<br>[NADP], mitochondrial<br>OS=Mus musculus OX=10090<br>GN=ldh2 PE=1<br>SV=1;sp P54071 I  | 3 | 1 | 1 | 1 | 0 | 1 | 0 | 1 |
| 33 | A0A140LIJ3;A<br>0A140LJE2;A0<br>A140LIA1;A0A<br>140LHT5;Q8B<br>WCO | A0A140LIJ3;A0A<br>140LJE2;A0A140<br>LIA1;A0A140LHT<br>5;Q8BWCO | 1;1;1;1;1 | 1;1;1;1;1 | 1;1;1;1;1 | Two pore<br>calcium<br>channel<br>protein 2             | Tpcn2             | tr A0A140LIJ3 A0A140LIJ3_M<br>OUSE Two pore calcium<br>channel protein 2 OS=Mus<br>musculus OX=10090 GN=Tpcn2<br>PE=1<br>SV=1;tr A0A140LJE2 A0A140LJ<br>E2_MOUSE Two pore calcium<br>channel protein 2 OS=Mus<br>musculus OX=10090 GN=Tpcn2<br>PE=1<br>SV=1;tr A0A140LIA1 A0A140LI<br>A1_MOUSE Two p | 5 | 1 | 1 | 1 | 0 | 1 | 0 | 0 |



|    | A                                                                                                                                                               | B                                                                                                                                                       | C                           | D                           | E                           | F                                                                                                                                       | G      | H                                                                                                                                                                                                                                                                  | I  | J | K | L | M | N | O | P |
|----|-----------------------------------------------------------------------------------------------------------------------------------------------------------------|---------------------------------------------------------------------------------------------------------------------------------------------------------|-----------------------------|-----------------------------|-----------------------------|-----------------------------------------------------------------------------------------------------------------------------------------|--------|--------------------------------------------------------------------------------------------------------------------------------------------------------------------------------------------------------------------------------------------------------------------|----|---|---|---|---|---|---|---|
| 34 | A0A140LIW0;<br>A0A286YDU8                                                                                                                                       | A0A140LIW0;A0<br>A286YDU8                                                                                                                               | 1;1                         | 1;1                         | 1;1                         |                                                                                                                                         |        | tr A0A140LIW0 A0A140LIW0_ MOUSE Coiled-coil and C2 domain-containing 2B OS=Mus musculus OX=10090 GN=Cc2d2b PE=1 SV=1;tr A0A286YDU8 A0A286YDU8_MOUSE Coiled-coil and C2 domain-containing 2B OS=Mus musculus OX=10090 GN=Cc2d2b PE=1 SV=1                           | 2  | 1 | 1 | 1 | 1 | 1 | 0 | 0 |
| 35 | A0A140LJD4                                                                                                                                                      | A0A140LJD4                                                                                                                                              | 1                           | 1                           | 1                           |                                                                                                                                         |        | tr A0A140LJD4 A0A140LJD4_ MOUSE Epithelial cell-transforming sequence 2 oncogene-like OS=Mus musculus OX=10090 GN=Ect2l PE=1 SV=1                                                                                                                                  | 1  | 1 | 1 | 1 | 1 | 0 | 0 | 0 |
| 36 | A0A140LJF0;Q<br>3UPT4;P7021<br>8                                                                                                                                | A0A140LJF0;Q3U<br>PT4;P70218                                                                                                                            | 1;1;1                       | 1;1;1                       | 1;1;1                       | Mitogen-<br>activated<br>protein kinase<br>kinase kinase<br>kinase;Mitogen-<br>activated<br>protein kinase<br>kinase kinase<br>kinase 1 | Map4k1 | tr A0A140LJF0 A0A140LJF0_ MOUSE Mitogen activated protein kinase kinase kinase 1, isoform CRA_a OS=Mus musculus OX=10090 GN=Map4k1 PE=1 SV=1;tr Q3UPT4 Q3UPT4_ MOUSE Mitogen-activated protein kinase kinase kinase kinase OS=Mus musculus OX=10090 GN=Map4        | 3  | 1 | 1 | 1 | 1 | 0 | 0 | 0 |
| 37 | A0A140T8S5;<br>Q8K327                                                                                                                                           | A0A140T8S5;Q8<br>K327                                                                                                                                   | 1;1                         | 1;1                         | 1;1                         | Chromosome<br>alignment-<br>maintaining<br>phosphoprotei<br>n 1                                                                         | Champ1 | tr A0A140T8S5 A0A140T8S5_ MOUSE Chromosome alignment-maintaining phosphoprotein 1 OS=Mus musculus OX=10090 GN=Champ1 PE=1 SV=2;sp Q8K327 CHAP1_MOUSE Chromosome alignment-maintaining phosphoprotein 1 OS=Mus musculus OX=10090 GN=Champ1 PE=1 SV=1                | 2  | 1 | 1 | 1 | 0 | 0 | 0 | 1 |
| 38 | A0A1B0GT41;<br>A0A1B0GQX5;<br>D3YZQ9;A0A1<br>B0GSR9;Q564<br>E2;A0A1B0GS<br>X0;P06151;A0<br>A1B0GRC1;A0<br>A1B0GRS2;A0<br>A1B0GRW9;A<br>0A1B0GSL7;A<br>0A1B0GS79 | A0A1B0GT41;A0<br>A1B0GQX5;D3YZ<br>Q9;A0A1B0GSR9<br>;Q564E2;A0A1B0<br>GSX0;P06151;A0<br>A1B0GRC1;A0A1<br>B0GRS2;A0A1B0<br>GRW9;A0A1B0G<br>SL7;A0A1B0GS79 | 2;2;2;2;2;2;<br>2;1;1;1;1;1 | 2;2;2;2;2;2;<br>2;1;1;1;1;1 | 2;2;2;2;2;2;<br>2;1;1;1;1;1 | L-lactate<br>dehydrogenase<br>;L-lactate<br>dehydrogenase<br>A chain                                                                    | Ldha   | tr A0A1B0GT41 A0A1B0GT41_ MOUSE L-lactate dehydrogenase A chain (Fragment) OS=Mus musculus OX=10090 GN=Ldha PE=1 SV=1;tr A0A1B0GQX5 A0A1B0GQX5_MOUSE L-lactate dehydrogenase OS=Mus musculus OX=10090 GN=Ldha PE=1 SV=1;tr D3YZQ9 D3YZQ9_ MOUSE L-lactate dehydrog | 12 | 2 | 2 | 2 | 0 | 1 | 2 | 1 |

|    | A                                                   | B                                               | C         | D         | E         | F                                                | G       | H                                                                                                                                                                                                                                                                                                    | I | J | K | L | M | N | O | P |
|----|-----------------------------------------------------|-------------------------------------------------|-----------|-----------|-----------|--------------------------------------------------|---------|------------------------------------------------------------------------------------------------------------------------------------------------------------------------------------------------------------------------------------------------------------------------------------------------------|---|---|---|---|---|---|---|---|
| 39 | A0A1B0GRY7;<br>A0A1B0GRG4;<br>A0A1B0GSG5;<br>Q91VI7 | A0A1B0GRY7;A0<br>A1B0GRG4;A0A1<br>B0GSG5;Q91VI7 | 1;1;1;1   | 1;1;1;1   | 1;1;1;1   | Ribonuclease<br>inhibitor                        | Rnh1    | tr A0A1B0GRY7 A0A1B0GRY7<br>_MOUSE Ribonuclease<br>inhibitor (Fragment) OS=Mus<br>musculus OX=10090 GN=Rnh1<br>PE=1<br>SV=1;tr A0A1B0GRG4 A0A1B0<br>GRG4_MOUSE Ribonuclease<br>inhibitor (Fragment) OS=Mus<br>musculus OX=10090 GN=Rnh1<br>PE=1<br>SV=1;tr A0A1B0GSG5 A0A1B0<br>GSG5_MOUSE Ribonucle | 4 | 1 | 1 | 1 | 0 | 0 | 0 | 0 |
| 40 | D3YY11;E9PZA<br>7;E9QLK7;E9P<br>WT1;A0A1D5<br>RLL4  | D3YY11;E9PZA7;<br>E9QLK7;E9PWT1<br>;A0A1D5RLL4  | 1;1;1;1;1 | 1;1;1;1;1 | 1;1;1;1;1 |                                                  | Trrap   | tr D3YY11 D3YY11_MOUSE<br>Transformation/transcription<br>domain-associated protein<br>(Fragment) OS=Mus musculus<br>OX=10090 GN=Trrap PE=1<br>SV=8;tr E9PZA7 E9PZA7_MOU<br>SE<br>Transformation/transcription<br>domain-associated protein<br>OS=Mus musculus OX=10090<br>GN=Trrap PE=1 SV=1;t      | 5 | 1 | 1 | 1 | 0 | 1 | 0 | 0 |
| 41 | A0A1L1SQ42;<br>D3YWRO;A0A<br>1D5RLT6;Q80<br>TI0     | A0A1L1SQ42;D3<br>YWRO;A0A1D5RL<br>T6;Q80TI0     | 1;1;1;1   | 1;1;1;1   | 1;1;1;1   | GRAM domain-<br>containing<br>protein 1B         | Gramd1b | tr A0A1L1SQ42 A0A1L1SQ42_<br>MOUSE Protein Aster-B<br>OS=Mus musculus OX=10090<br>GN=Gramd1b PE=1<br>SV=1;tr D3YWRO D3YWRO_M<br>OUSE Protein Aster-B OS=Mus<br>musculus OX=10090<br>GN=Gramd1b PE=1<br>SV=2;tr A0A1D5RLT6 A0A1D5<br>RLT6_MOUSE Protein Aster-B<br>OS=Mus musculus OX=10090<br>GN=Gra | 4 | 1 | 1 | 1 | 0 | 1 | 0 | 0 |
| 42 | A0A1D5RMD1                                          | A0A1D5RMD1                                      | 1         | 1         | 1         |                                                  |         | tr A0A1D5RMD1 A0A1D5RMD<br>1_MOUSE IQ motif-containing<br>N OS=Mus musculus OX=10090<br>GN=lqcn PE=4 SV=1                                                                                                                                                                                            | 1 | 1 | 1 | 1 | 0 | 0 | 1 | 0 |
| 43 | E7FLY0;A0A1D<br>5RMD4;B1AV<br>Y7                    | E7FLY0;A0A1D5R<br>MD4;B1AVY7                    | 1;1;1     | 1;1;1     | 1;1;1     | Kinesin-like<br>protein;Kinesin-<br>like protein | Kif16b  | tr E7FLY0 E7FLY0_MOUSE<br>Kinesin superfamily protein<br>16B OS=Mus musculus<br>OX=10090 GN=Kif16b PE=1<br>SV=1;tr A0A1D5RMD4 A0A1D<br>5RMD4_MOUSE Kinesin-like<br>protein KIF16B OS=Mus<br>musculus OX=10090<br>GN=Kif16b PE=1<br>SV=1;sp B1AVY7 KI16B_MOUS<br>E Kinesin-like protein KIF16B<br>OS  | 3 | 1 | 1 | 1 | 0 | 1 | 0 | 1 |

|    | A                               | B                              | C       | D       | E       | F                                                  | G       | H                                                                                                                                                                                                                                                                 | I | J | K | L | M | N | O | P |
|----|---------------------------------|--------------------------------|---------|---------|---------|----------------------------------------------------|---------|-------------------------------------------------------------------------------------------------------------------------------------------------------------------------------------------------------------------------------------------------------------------|---|---|---|---|---|---|---|---|
| 44 | A0A1D5RMI8; Q8K4E0              | A0A1D5RMI8; Q8K4E0             | 1;1     | 1;1     | 1;1     | Alstrom syndrome protein 1 homolog                 | Alms1   | tr A0A1D5RMI8 A0A1D5RMI8_MOUSE Alstrom syndrome protein 1 homolog OS=Mus musculus OX=10090 GN=Alms1 PE=1 SV=1;sp Q8K4E0 ALMS1_MOUSE Alstrom syndrome protein 1 homolog OS=Mus musculus OX=10090 GN=Alms1 PE=1 SV=2                                                | 2 | 1 | 1 | 1 | 0 | 0 | 1 | 0 |
| 45 | A0A1L1SQS5                      | A0A1L1SQS5                     | 1       | 1       | 1       |                                                    |         | tr A0A1L1SQS5 A0A1L1SQS5_MOUSE Protein FAM76B (Fragment) OS=Mus musculus OX=10090 GN=Fam76b PE=1 SV=1                                                                                                                                                             | 1 | 1 | 1 | 1 | 1 | 0 | 0 | 0 |
| 46 | D3Z685;A0A1L1SS23;D3Z6K8;P70392 | D3Z685;A0A1L1S23;D3Z6K8;P70392 | 1;1;1;1 | 1;1;1;1 | 1;1;1;1 | Ras-specific guanine nucleotide-releasing factor 2 | Rasgrf2 | tr D3Z685 D3Z685_MOUSE Ras-specific guanine nucleotide-releasing factor 2 (Fragment) OS=Mus musculus OX=10090 GN=Rasgrf2 PE=1 SV=1;tr A0A1L1SS23 A0A1L1S23_MOUSE Ras-specific guanine nucleotide-releasing factor 2 OS=Mus musculus OX=10090 GN=Rasgrf2 PE=1 SV=1 | 4 | 1 | 1 | 1 | 0 | 0 | 1 | 0 |
| 47 | A0A1L1STC6; Q6ZWR6              | A0A1L1STC6; Q6ZWR6             | 1;1     | 1;1     | 1;1     | Nesprin-1                                          | Syne1   | tr A0A1L1STC6 A0A1L1STC6_MOUSE Nesprin-1 OS=Mus musculus OX=10090 GN=Syne1 PE=1 SV=1;sp Q6ZWR6 SYNE1_MOUSE Nesprin-1 OS=Mus musculus OX=10090 GN=Syne1 PE=1 SV=2                                                                                                  | 2 | 1 | 1 | 1 | 0 | 0 | 0 | 1 |
| 48 | A0A1L1STZ4;P29477               | A0A1L1STZ4;P29477              | 1;1     | 1;1     | 1;1     | Nitric oxide synthase, inducible                   | Nos2    | tr A0A1L1STZ4 A0A1L1STZ4_MOUSE Nitric oxide synthase, inducible OS=Mus musculus OX=10090 GN=Nos2 PE=1 SV=1;sp P29477 NOS2_MOUSE Nitric oxide synthase, inducible OS=Mus musculus OX=10090 GN=Nos2 PE=1 SV=1                                                       | 2 | 1 | 1 | 1 | 0 | 0 | 0 | 1 |
| 49 | A0A1W2P6V6                      | A0A1W2P6V6                     | 1       | 1       | 1       |                                                    |         | tr A0A1W2P6V6 A0A1W2P6V6_MOUSE Nuclear protein MDM1 OS=Mus musculus OX=10090 GN=Mdm1 PE=1 SV=1                                                                                                                                                                    | 1 | 1 | 1 | 1 | 0 | 0 | 1 | 0 |

|    | A                                                                                                   | B                                                                                                   | C                       | D                       | E                       | F                                               | G      | H                                                                                                                                                                                                                                                                | I  | J | K | L | M | N | O | P |
|----|-----------------------------------------------------------------------------------------------------|-----------------------------------------------------------------------------------------------------|-------------------------|-------------------------|-------------------------|-------------------------------------------------|--------|------------------------------------------------------------------------------------------------------------------------------------------------------------------------------------------------------------------------------------------------------------------|----|---|---|---|---|---|---|---|
| 50 | A0A1W2P6V7;Q924W5                                                                                   | A0A1W2P6V7;Q924W5                                                                                   | 1;1                     | 1;1                     | 1;1                     | Structural maintenance of chromosomes protein 6 | Smc6   | tr A0A1W2P6V7 A0A1W2P6V7_MOUSE Structural maintenance of chromosomes protein 6 (Fragment) OS=Mus musculus OX=10090 GN=Smc6 PE=1 SV=1;sp Q924W5 SMC6_MOUSE Structural maintenance of chromosomes protein 6 OS=Mus musculus OX=10090 GN=Smc6 PE=1 SV=1             | 2  | 1 | 1 | 1 | 0 | 0 | 0 | 1 |
| 51 | A2AB60;A0A1W2P6X3;Q9JL26                                                                            | A2AB60;A0A1W2P6X3;Q9JL26                                                                            | 1;1;1                   | 1;1;1                   | 1;1;1                   | Formin-like protein 1                           | Fmnl1  | tr A2AB60 A2AB60_MOUSE Formin-like 1, isoform CRA_c OS=Mus musculus OX=10090 GN=Fmnl1 PE=1 SV=1;tr A0A1W2P6X3 A0A1W2P6X3_MOUSE Formin-like protein 1 OS=Mus musculus OX=10090 GN=Fmnl1 PE=1 SV=1;sp Q9JL26 FMNL1_MOUSE Formin-like protein 1 OS=Mus musculus OX= | 3  | 1 | 1 | 1 | 0 | 0 | 0 | 0 |
| 52 | A0A286YDM3;H3BK96;H3BKDO;B2M1R6;P61979;Q8BT23;A0A286YDH1;A0A286YEC4;H3BK18;A0A286YCM2;H3BLP7;H3BLL4 | A0A286YDM3;H3BK96;H3BKDO;B2M1R6;P61979;Q8BT23;A0A286YDH1;A0A286YEC4;H3BK18;A0A286YCM2;H3BLP7;H3BLL4 | 2;2;2;2;2;1;1;1;1;1;1;1 | 2;2;2;2;2;1;1;1;1;1;1;1 | 2;2;2;2;2;1;1;1;1;1;1;1 | Heterogeneous nuclear ribonucleoprotein K       | Hnrnpk | tr A0A286YDM3 A0A286YDM3_MOUSE Heterogeneous nuclear ribonucleoprotein K (Fragment) OS=Mus musculus OX=10090 GN=Hnrnpk PE=1 SV=1;tr H3BK96 H3BK96_MOUSE Heterogeneous nuclear ribonucleoprotein K (Fragment) OS=Mus musculus OX=10090 GN=Hnrnpk PE=1 SV=8;tr H3B | 12 | 2 | 2 | 2 | 0 | 0 | 2 | 1 |
| 53 | A0A2R8VHF9;E9QPE7;A0A338P6K2                                                                        | A0A2R8VHF9;E9QPE7;A0A338P6K2                                                                        | 1;1;1                   | 1;1;1                   | 1;1;1                   |                                                 | Myh11  | tr A0A2R8VHF9 A0A2R8VHF9_MOUSE Myosin-11 OS=Mus musculus OX=10090 GN=Myh11 PE=1 SV=1;tr E9QPE7 E9QPE7_MOUSE Myosin-11 OS=Mus musculus OX=10090 GN=Myh11 PE=1 SV=2;tr A0A338P6K2 A0A338P6K2_MOUSE Myosin-11 OS=Mus musculus OX=10090 GN=Myh11 PE=1 SV=1           | 3  | 1 | 1 | 1 | 0 | 0 | 0 | 0 |
| 54 | A0A2R8VHQ0                                                                                          | A0A2R8VHQ0                                                                                          | 1                       | 1                       | 1                       |                                                 |        | tr A0A2R8VHQ0 A0A2R8VHQ0_MOUSE Tensin-2 OS=Mus musculus OX=10090 GN=Tns2 PE=1 SV=1                                                                                                                                                                               | 1  | 1 | 1 | 1 | 1 | 0 | 0 | 0 |

|    | A                                                                 | B                                                             | C           | D           | E           | F                                                                         | G       | H                                                                                                                                                                                                                                                                                                     | I | J | K | L | M | N | O | P |
|----|-------------------------------------------------------------------|---------------------------------------------------------------|-------------|-------------|-------------|---------------------------------------------------------------------------|---------|-------------------------------------------------------------------------------------------------------------------------------------------------------------------------------------------------------------------------------------------------------------------------------------------------------|---|---|---|---|---|---|---|---|
| 55 | A0A338P6A7;<br>Q8C9K6;B7ZN<br>N5;Q8BRB1;P<br>29319                | A0A338P6A7;Q8<br>C9K6;B7ZNN5;Q<br>8BRB1;P29319                | 1;1;1;1;1   | 1;1;1;1;1   | 1;1;1;1;1   | Receptor<br>protein-<br>tyrosine<br>kinase;Ephrin<br>type-A<br>receptor 3 | Epha3   | tr A0A338P6A7 A0A338P6A7_<br>MOUSE Ephrin type-A receptor<br>3 (Fragment) OS=Mus<br>musculus OX=10090<br>GN=Epha3 PE=1<br>SV=1;tr Q8C9K6 Q8C9K6_MO<br>USE Eph receptor A3, isoform<br>CRA_b OS=Mus musculus<br>OX=10090 GN=Epha3 PE=1<br>SV=1;tr B7ZNN5 B7ZNN5_MO<br>USE Epha3 protein OS=Mus<br>mus  | 5 | 1 | 1 | 1 | 0 | 1 | 0 | 0 |
| 56 | A0A338P7E3;<br>A0A338P711;<br>COHKG6;COHK<br>G5                   | A0A338P7E3;A0<br>A338P711;COHK<br>G6;COHKG5                   | 1;1;1;1     | 1;1;1;1     | 1;1;1;1     |                                                                           |         | tr A0A338P7E3 A0A338P7E3_<br>MOUSE Ribonuclease T2-B<br>OS=Mus musculus OX=10090<br>GN=Rnaset2b PE=1<br>SV=1;tr A0A338P711 A0A338P<br>711_MOUSE Ribonuclease T2-<br>B (Fragment) OS=Mus<br>musculus OX=10090<br>GN=Rnaset2b PE=1<br>SV=1;sp COHKG6 RNT2B_MO<br>USE Ribonuclease T2-B<br>OS=Mus muscul | 4 | 1 | 1 | 1 | 0 | 1 | 0 | 0 |
| 57 | A0A338P733;<br>A0A338P7D0;<br>E0CYI5;Q6S9I0<br>;Q6S9I2;Q6S9I<br>3 | A0A338P733;A0<br>A338P7D0;E0CYI<br>5;Q6S9I0;Q6S9I2<br>;Q6S9I3 | 1;1;1;1;1;1 | 1;1;1;1;1;1 | 1;1;1;1;1;1 |                                                                           | Kng2    | tr A0A338P733 A0A338P733_<br>MOUSE Kininogen 2 OS=Mus<br>musculus OX=10090 GN=Kng2<br>PE=1<br>SV=1;tr A0A338P7D0 A0A338<br>P7D0_MOUSE Kininogen 2<br>(Fragment) OS=Mus musculus<br>OX=10090 GN=Kng2 PE=1<br>SV=1;tr E0CYI5 E0CYI5_MOUS<br>E Kininogen 2 OS=Mus<br>musculus OX=10090 GN=Kng2<br>PE=1   | 6 | 1 | 1 | 1 | 0 | 0 | 1 | 0 |
| 58 | A0A3B2WB08<br>;A0A3B2WD8<br>6;A0A3B2W3S<br>2;D3Z7M3               | A0A3B2WB08;A<br>0A3B2WD86;A0<br>A3B2W3S2;D3Z7<br>M3           | 1;1;1;1     | 1;1;1;1     | 1;1;1;1     |                                                                           | Vmn2r73 | tr A0A3B2WB08 A0A3B2WB0<br>8_MOUSE Vomeronasal 2,<br>receptor 73 OS=Mus musculus<br>OX=10090 GN=Vmn2r73 PE=3<br>SV=1;tr A0A3B2WD86 A0A3B<br>2WD86_MOUSE Vomeronasal<br>2, receptor 73 OS=Mus<br>musculus OX=10090<br>GN=Vmn2r73 PE=3<br>SV=1;tr A0A3B2W3S2 A0A3B2<br>W3S2_MOUSE Vomeronasal 2,<br>re  | 4 | 1 | 1 | 1 | 0 | 1 | 0 | 0 |

|    | A                           | B                           | C       | D       | E       | F                                                                                                           | G      | H                                                                                                                                                                                                                                                                | I | J | K | L | M | N | O | P |
|----|-----------------------------|-----------------------------|---------|---------|---------|-------------------------------------------------------------------------------------------------------------|--------|------------------------------------------------------------------------------------------------------------------------------------------------------------------------------------------------------------------------------------------------------------------|---|---|---|---|---|---|---|---|
| 59 | A0A3B2WBD2;Q64378           | A0A3B2WBD2;Q64378           | 1;1     | 1;1     | 1;1     | Peptidyl-prolyl cis-trans isomerase FKBP5;Peptidyl-prolyl cis-trans isomerase FKBP5, N-terminally processed | Fkbp5  | tr A0A3B2WBD2 A0A3B2WBD2_MOUSE Peptidylprolyl isomerase OS=Mus musculus OX=10090 GN=Fkbp5 PE=1 SV=1;sp Q64378 FKBP5_MOUSE Peptidyl-prolyl cis-trans isomerase FKBP5 OS=Mus musculus OX=10090 GN=Fkbp5 PE=1 SV=1                                                  | 2 | 1 | 1 | 1 | 1 | 0 | 0 | 0 |
| 60 | A1L314                      | A1L314                      | 1       | 1       | 1       | Macrophage-expressed gene 1 protein                                                                         | Mpeg1  | sp A1L314 MPEG1_MOUSE Macrophage-expressed gene 1 protein OS=Mus musculus OX=10090 GN=Mpeg1 PE=1 SV=1                                                                                                                                                            | 1 | 1 | 1 | 1 | 1 | 0 | 0 | 0 |
| 61 | E9Q7P0;A2A520;K3W4R0;Q69Z23 | E9Q7P0;A2A520;K3W4R0;Q69Z23 | 1;1;1;1 | 1;1;1;1 | 1;1;1;1 | Dynein heavy chain 17, axonemal                                                                             | Dnah17 | tr E9Q7P0 E9Q7P0_MOUSE Dynein heavy chain 17, axonemal OS=Mus musculus OX=10090 GN=Dnah17 PE=1 SV=1;tr A2A520 A2A520_MOUSE Dynein heavy chain 17, axonemal OS=Mus musculus OX=10090 GN=Dnah17 PE=1 SV=3;tr K3W4R0 K3W4R0_MOUSE Dynein heavy chain 17, axonemal O | 4 | 1 | 1 | 1 | 0 | 0 | 0 | 0 |
| 62 | A2A6Z8;Q8CDM4               | A2A6Z8;Q8CDM4               | 1;1     | 1;1     | 1;1     | Coiled-coil domain-containing protein 73                                                                    | Ccdc73 | tr A2A6Z8 A2A6Z8_MOUSE Coiled-coil domain containing 73 (Fragment) OS=Mus musculus OX=10090 GN=Ccdc73 PE=4 SV=1;sp Q8CDM4 CCD73_MOUSE Coiled-coil domain-containing protein 73 OS=Mus musculus OX=10090 GN=Ccdc73 PE=2 SV=2                                      | 2 | 1 | 1 | 1 | 0 | 0 | 1 | 0 |
| 63 | A2ACG7;Q9DBG6               | A2ACG7;Q9DBG6               | 2;2     | 2;2     | 2;2     | Dolichyl-diphosphooligosaccharide--protein glycosyltransferase subunit 2                                    | Rpn2   | tr A2ACG7 A2ACG7_MOUSE Dolichyl-diphosphooligosaccharide--protein glycosyltransferase subunit 2 OS=Mus musculus OX=10090 GN=Rpn2 PE=1 SV=1;sp Q9DBG6 RPN2_MOUSE Dolichyl-diphosphooligosaccharide--protein glycosyltransferase subunit 2 OS=Mus musculus OX=1009 | 2 | 2 | 2 | 2 | 0 | 0 | 0 | 1 |

|    | A                                  | B                                  | C         | D         | E         | F                                               | G      | H                                                                                                                                                                                                                                                                                                                     | I | J | K | L | M | N | O | P |
|----|------------------------------------|------------------------------------|-----------|-----------|-----------|-------------------------------------------------|--------|-----------------------------------------------------------------------------------------------------------------------------------------------------------------------------------------------------------------------------------------------------------------------------------------------------------------------|---|---|---|---|---|---|---|---|
| 64 | A2AFN3;E9Q160;E9Q098;E9Q886;Q6DIC6 | A2AFN3;E9Q160;E9Q098;E9Q886;Q6DIC6 | 1;1;1;1;1 | 1;1;1;1;1 | 1;1;1;1;1 |                                                 | Tro    | tr A2AFN3 A2AFN3_MOUSE Trophinin (Fragment) OS=Mus musculus OX=10090 GN=Tro PE=1 SV=8;tr E9Q160 E9Q160_MOUSE Trophinin OS=Mus musculus OX=10090 GN=Tro PE=1 SV=1;tr E9Q098 E9Q098_MOUSE Trophinin OS=Mus musculus OX=10090 GN=Tro PE=1 SV=1;tr E9Q886 E9Q886_MOUSE                                                    | 5 | 1 | 1 | 1 | 1 | 0 | 0 | 0 |
| 65 | A2AG83;Q9Z2X2                      | A2AG83;Q9Z2X2                      | 1;1       | 1;1       | 1;1       | 26S proteasome non-ATPase regulatory subunit 10 | Psm10  | tr A2AG83 A2AG83_MOUSE 26S proteasome non-ATPase regulatory subunit 10 OS=Mus musculus OX=10090 GN=Psm10 PE=1 SV=1;sp Q9Z2X2 PSD10_MOUSE 26S proteasome non-ATPase regulatory subunit 10 OS=Mus musculus OX=10090 GN=Psm10 PE=1 SV=3                                                                                  | 2 | 1 | 1 | 1 | 0 | 0 | 0 | 0 |
| 66 | A2AGX3                             | A2AGX3                             | 1         | 1         | 1         | PR domain-containing protein 11                 | Prdm11 | sp A2AGX3 PRD11_MOUSE PR domain-containing protein 11 OS=Mus musculus OX=10090 GN=Prdm11 PE=1 SV=1                                                                                                                                                                                                                    | 1 | 1 | 1 | 1 | 0 | 0 | 1 | 0 |
| 67 | Q8CBM2;A2AL85;Q8BSY0               | Q8CBM2;A2AL85;Q8BSY0               | 1;1;1     | 1;1;1     | 1;1;1     | Aspartyl/asparaginyl beta-hydroxylase           | Asph   | tr Q8CBM2 Q8CBM2_MOUSE Aspartyl/asparaginyl beta-hydroxylase OS=Mus musculus OX=10090 GN=Asph PE=1 SV=1;tr A2AL85 A2AL85_MOUSE Aspartyl/asparaginyl beta-hydroxylase OS=Mus musculus OX=10090 GN=Asph PE=1 SV=1;sp Q8BSY0 ASPH_MOUSE Aspartyl/asparaginyl beta-hydroxylase OS=Mus musculus OX=10090 GN=Asph PE=1 SV=1 | 3 | 1 | 1 | 1 | 0 | 0 | 1 | 0 |
| 68 | E9Q8N1;E9Q8K5;A2ASS6;A2AT70;F7CR78 | E9Q8N1;E9Q8K5;A2ASS6;A2AT70;F7CR78 | 2;2;2;1;1 | 2;2;2;1;1 | 2;2;2;1;1 | Titin                                           | Ttn    | tr E9Q8N1 E9Q8N1_MOUSE Titin OS=Mus musculus OX=10090 GN=Ttn PE=1 SV=1;tr E9Q8K5 E9Q8K5_MOUSE Titin OS=Mus musculus OX=10090 GN=Ttn PE=1 SV=1;sp A2ASS6 TITIN_MOUSE Titin OS=Mus musculus OX=10090 GN=Ttn PE=1 SV=1;tr A2AT70 A2AT70_MOUSE Titin (Fragment) OS=M                                                      | 5 | 2 | 2 | 2 | 1 | 0 | 1 | 0 |

|    | A                                                                                    | B                                                               | C                     | D                     | E                     | F                                                                                 | G                                | H                                                                                                                                                                                                                                                                      | I  | J | K | L | M | N | O | P |
|----|--------------------------------------------------------------------------------------|-----------------------------------------------------------------|-----------------------|-----------------------|-----------------------|-----------------------------------------------------------------------------------|----------------------------------|------------------------------------------------------------------------------------------------------------------------------------------------------------------------------------------------------------------------------------------------------------------------|----|---|---|---|---|---|---|---|
| 69 | A2BDW0;P35991                                                                        | A2BDW0;P35991                                                   | 1;1                   | 1;1                   | 1;1                   | Tyrosine-protein kinase BTK                                                       | Btk                              | tr A2BDW0 A2BDW0_MOUSE Tyrosine-protein kinase OS=Mus musculus OX=10090 GN=Btk PE=1 SV=1;sp P35991 BTK_MOUSE Tyrosine-protein kinase BTK OS=Mus musculus OX=10090 GN=Btk PE=1 SV=4                                                                                     | 2  | 1 | 1 | 1 | 0 | 0 | 0 | 1 |
| 70 | A2CG35;P35283                                                                        | A2CG35;P35283                                                   | 1;1                   | 1;1                   | 1;1                   | Ras-related protein Rab-12                                                        | Rab12                            | tr A2CG35 A2CG35_MOUSE Ras-related protein Rab-12 OS=Mus musculus OX=10090 GN=Rab12 PE=1 SV=1;sp P35283 RAB12_MOUSE SE Ras-related protein Rab-12 OS=Mus musculus OX=10090 GN=Rab12 PE=1 SV=3                                                                          | 2  | 1 | 1 | 1 | 1 | 1 | 0 | 0 |
| 71 | A6BLY7                                                                               | A6BLY7                                                          | 1                     | 1                     | 1                     | Keratin, type I cytoskeletal 28                                                   | Krt28                            | sp A6BLY7 K1C28_MOUSE Keratin, type I cytoskeletal 28 OS=Mus musculus OX=10090 GN=Krt28 PE=1 SV=1                                                                                                                                                                      | 1  | 1 | 1 | 1 | 1 | 1 | 1 | 1 |
| 72 | A6ZI44;P05064;D3Z510;A0A0U1RPN8;D3YWI1;A0A0U1RPT5;Q9CPQ9;A6ZI46;D3YV98;A6ZI47;P05063 | A6ZI44;P05064;D3Z510;A0A0U1RPN8;D3YWI1;A0A0U1RPT5;Q9CPQ9;A6ZI46 | 5;5;4;4;4;3;3;3;2;2;1 | 5;5;4;4;4;3;3;3;2;2;1 | 5;5;4;4;4;3;3;3;2;2;1 | Fructose-bisphosphate aldolase;Fructose-bisphosphate aldolase A                   | Aldoa;Aldoart1                   | tr A6ZI44 A6ZI44_MOUSE Fructose-bisphosphate aldolase OS=Mus musculus OX=10090 GN=Aldoa PE=1 SV=1;sp P05064 ALDOA_MOUSE SE Fructose-bisphosphate aldolase A OS=Mus musculus OX=10090 GN=Aldoa PE=1 SV=2;tr D3Z510 D3Z510_MOUSE SE Fructose-bisphosphate aldolase A (Fr | 11 | 5 | 5 | 5 | 0 | 0 | 4 | 0 |
| 73 | A8DIL0;Q9JL15                                                                        | A8DIL0;Q9JL15                                                   | 1;1                   | 1;1                   | 1;1                   | Galectin;Galectin-8                                                               | Lgals8                           | tr A8DIL0 A8DIL0_MOUSE Galectin OS=Mus musculus OX=10090 GN=Lgals8 PE=1 SV=1;sp Q9JL15 LEG8_MOUSE Galectin-8 OS=Mus musculus OX=10090 GN=Lgals8 PE=1 SV=1                                                                                                              | 2  | 1 | 1 | 1 | 0 | 0 | 1 | 0 |
| 74 | E9Q223;CON_P02070;A8DUK4;CON_Q35X09;P02104;P02089;P02088                             | E9Q223;CON_P02070;A8DUK4;CON_Q35X09;P02104;P02089;P02088        | 1;1;1;1;1;1;1         | 1;1;1;1;1;1;1         | 1;1;1;1;1;1;1         | Hemoglobin subunit epsilon-Y2;Hemoglobin subunit beta-2;Hemoglobin subunit beta-1 | Hbb-bs;Hbbt1;Hbb-y;Hbb-b2;Hbb-b1 | tr E9Q223 E9Q223_MOUSE Hemoglobin, beta adult s chain (Fragment) OS=Mus musculus OX=10090 GN=Hbb-bs PE=1 SV=1;;tr A8DUK4 A8DUK4_MOUSE Beta-globin OS=Mus musculus OX=10090 GN=Hbb-bs PE=1 SV=1;;sp P02104 HBE_MOUSE Hemoglobin subunit epsilon-Y2 OS=Mus musculus      | 7  | 1 | 1 | 1 | 0 | 0 | 0 | 0 |



|    | A                                        | B                                  | C     | D     | E     | F                                                                                                                             | G                                  | H                                                                                                                                                                                                                                                                     | I | J | K | L | M | N | O | P |
|----|------------------------------------------|------------------------------------|-------|-------|-------|-------------------------------------------------------------------------------------------------------------------------------|------------------------------------|-----------------------------------------------------------------------------------------------------------------------------------------------------------------------------------------------------------------------------------------------------------------------|---|---|---|---|---|---|---|---|
| 75 | G5E8D1;A9JTY7;O70562;O70558;O70554;O7055 | G5E8D1;A9JTY7;O70562;O70558;O70559 | 1     | 1     | 1     | Small proline-rich protein 2K;Small proline-rich protein 2G;Small proline-rich protein 2D;Small proline-rich protein 2B;Small | Sprr2k;Sprr2b;Sprr2g;Sprr2d;Sprr2h | tr G5E8D1 G5E8D1_MOUSE Small proline-rich protein 2K OS=Mus musculus OX=10090 GN=Sprr2k PE=4 SV=1;tr A9JTY7 A9JTY7_MOUSE E MCG119409 OS=Mus musculus OX=10090 GN=Sprr2b PE=2 SV=1;sp O70562 SPR2K_MOUSE SE Small proline-rich protein 2K OS=Mus musculus OX=10090 GN= | 7 | 1 | 1 | 1 | 0 | 1 | 0 | 0 |
| 76 | BOR081                                   | BOR081                             | 1     | 1     | 1     |                                                                                                                               | Tbc1d20                            | tr BOR081 BOR081_MOUSE TBC1 domain family member 20 (Fragment) OS=Mus musculus OX=10090 GN=Tbc1d20 PE=1 SV=1                                                                                                                                                          | 1 | 1 | 1 | 1 | 1 | 0 | 0 | 0 |
| 77 | BOR0C6                                   | BOR0C6                             | 1     | 1     | 1     |                                                                                                                               | Myt1                               | tr BOR0C6 BOR0C6_MOUSE Myelin transcription factor 1 (Fragment) OS=Mus musculus OX=10090 GN=Myt1 PE=1 SV=1                                                                                                                                                            | 1 | 1 | 1 | 1 | 1 | 0 | 0 | 0 |
| 78 | B1ARV3                                   | B1ARV3                             | 1     | 1     | 1     |                                                                                                                               | Lao1                               | tr B1ARV3 B1ARV3_MOUSE Amine oxidase OS=Mus musculus OX=10090 GN=Lao1 PE=3 SV=1                                                                                                                                                                                       | 1 | 1 | 1 | 1 | 0 | 0 | 0 | 0 |
| 79 | B1AZS9;O08807                            | B1AZS9;O08807                      | 1;1   | 1;1   | 1;1   | Peroxiredoxin-4                                                                                                               | Prdx4                              | tr B1AZS9 B1AZS9_MOUSE Peroxiredoxin-4 (Fragment) OS=Mus musculus OX=10090 GN=Prdx4 PE=1 SV=1;sp O08807 PRDX4_MOUSE SE Peroxiredoxin-4 OS=Mus musculus OX=10090 GN=Prdx4 PE=1 SV=1                                                                                    | 2 | 1 | 1 | 1 | 0 | 0 | 1 | 0 |
| 80 | G3UXK5;B2KG46;Q8BR07                     | G3UXK5;B2KG46;Q8BR07               | 1;1;1 | 1;1;1 | 1;1;1 | Protein bicaudal D homolog 1                                                                                                  | Bicd1                              | tr G3UXK5 G3UXK5_MOUSE Protein bicaudal D homolog 1 OS=Mus musculus OX=10090 GN=Bicd1 PE=1 SV=1;tr B2KG46 B2KG46_MOUSE Protein bicaudal D homolog 1 OS=Mus musculus OX=10090 GN=Bicd1 PE=1 SV=1;sp Q8BR07 BICD1_MOUSE SE Protein bicaudal D homolog 1 OS=Mus muscul   | 3 | 1 | 1 | 1 | 0 | 0 | 0 | 0 |
| 81 | B2RXC1                                   | B2RXC1                             | 1     | 1     | 1     | Trafficking protein particle complex subunit 11                                                                               | Trappc11                           | sp B2RXC1 TPC11_MOUSE Trafficking protein particle complex subunit 11 OS=Mus musculus OX=10090 GN=Trappc11 PE=1 SV=1                                                                                                                                                  | 1 | 1 | 1 | 1 | 0 | 0 | 0 | 0 |

|    | A                                                                                             | B                                                                | C       | D       | E       | F                                           | G       | H                                                                                                                                                                                                                                                                                      | I | J | K | L | M | N | O | P |
|----|-----------------------------------------------------------------------------------------------|------------------------------------------------------------------|---------|---------|---------|---------------------------------------------|---------|----------------------------------------------------------------------------------------------------------------------------------------------------------------------------------------------------------------------------------------------------------------------------------------|---|---|---|---|---|---|---|---|
| 82 | F6Z2C0;B7FAU9;Q8BTM8                                                                          | F6Z2C0;B7FAU9;Q8BTM8                                             | 1;1;1   | 1;1;1   | 1;1;1   | Filamin-A                                   | Flna    | tr F6Z2C0 F6Z2C0_MOUSE<br>Filamin-A (Fragment) OS=Mus musculus OX=10090 GN=Flna PE=1<br>SV=8;tr B7FAU9 B7FAU9_MOUSE<br>USE Filamin, alpha OS=Mus musculus OX=10090 GN=Flna PE=1<br>SV=1;sp Q8BTM8 FLNA_MOUSE<br>SE Filamin-A OS=Mus musculus OX=10090 GN=Flna PE=1 SV=5                | 3 | 1 | 1 | 1 | 0 | 1 | 1 | 0 |
| 83 | D6REF6;B7ZY0;Q91WK7                                                                           | D6REF6;B7ZY0;Q91WK7                                              | 1;1;1   | 1;1;1   | 1;1;1   | Ankyrin repeat domain-containing protein 54 | Ankrd54 | tr D6REF6 D6REF6_MOUSE<br>Ankyrin repeat domain-containing protein 54 OS=Mus musculus OX=10090 GN=Ankrd54 PE=1<br>SV=1;tr B7ZY0 B7ZY0_MOUSE<br>SE Ankyrin repeat domain-containing protein 54 (Fragment) OS=Mus musculus OX=10090 GN=Ankrd54 PE=1<br>SV=8;sp Q91WK7 ANR54_MOUSE        | 3 | 1 | 1 | 1 | 0 | 0 | 1 | 0 |
| 84 | B9EHC9                                                                                        | B9EHC9                                                           | 1       | 1       | 1       |                                             | Zc2hc1b | tr B9EHC9 B9EHC9_MOUSE<br>Fam164b protein OS=Mus musculus OX=10090 GN=Zc2hc1b PE=2 SV=1                                                                                                                                                                                                | 1 | 1 | 1 | 1 | 0 | 0 | 0 | 0 |
| 85 | Q3TY91;B9EK G2;E9PUJ8                                                                         | Q3TY91;B9EKG2;E9PUJ8                                             | 1;1;1   | 1;1;1   | 1;1;1   |                                             | Mroh5   | tr Q3TY91 Q3TY91_MOUSE<br>Maestro heat-like repeat family member 5 OS=Mus musculus OX=10090 GN=Mroh5 PE=2<br>SV=1;tr B9EKG2 B9EKG2_MOUSE<br>USE Gm628 protein OS=Mus musculus OX=10090 GN=Mroh5 PE=2<br>SV=1;tr E9PUJ8 E9PUJ8_MOUSE<br>SE Maestro heat-like repeat family member 5 OS= | 3 | 1 | 1 | 1 | 1 | 0 | 0 | 0 |
| 86 | CON__ENSEM BL:ENSBTAP0                                                                        | CON__ENSEMBL :ENSBTAP00000                                       | 1       | 1       | 1       |                                             |         |                                                                                                                                                                                                                                                                                        | 1 | 1 | 1 | 1 | 0 | 0 | 0 | 0 |
| 87 | CON__ENSEM BL:ENSBTAP0                                                                        | CON__ENSEMBL :ENSBTAP00000                                       | 1       | 1       | 1       |                                             |         |                                                                                                                                                                                                                                                                                        | 1 | 1 | 1 | 1 | 0 | 0 | 0 | 1 |
| 88 | CON__ENSEM BL:ENSBTAP0                                                                        | CON__ENSEMBL :ENSBTAP00000                                       | 1       | 1       | 1       |                                             |         |                                                                                                                                                                                                                                                                                        | 1 | 1 | 1 | 1 | 1 | 0 | 0 | 0 |
| 89 | CON__ENSEM BL:ENSBTAP0000024466;CON__ENSEMBL:ENSBTAP0000024466;CON__ENSEMBL:ENSBTAP0000024462 | CON__ENSEMBL :ENSBTAP00000 024466;CON__ENSEMBL:ENSBTAP0000024462 | 6;5     | 6;5     | 6;5     |                                             |         | ;                                                                                                                                                                                                                                                                                      | 2 | 6 | 6 | 6 | 1 | 3 | 4 | 5 |
| 90 | CON__ENSEM BL:ENSP0000377550;CON__P1364-                                                      | CON__ENSEMBL :ENSP0000377550;CON__P1364-                         | 6;6;4;4 | 1;1;0;0 | 0;0;0;0 | Keratin, type I cytoskeletal 13             | Krt13   | ;;;sp P08730 K1C13_MOUSE<br>Keratin, type I cytoskeletal 13 OS=Mus musculus OX=10090 GN=Krt13 PE=1 SV=2                                                                                                                                                                                | 4 | 6 | 1 | 0 | 2 | 4 | 1 | 4 |

|    | A                                                      | B                                                  | C        | D        | E       | F | G | H   | I | J  | K  | L  | M | N  | O | P |
|----|--------------------------------------------------------|----------------------------------------------------|----------|----------|---------|---|---|-----|---|----|----|----|---|----|---|---|
| 91 | CON__O43790;<br>CON__Q6NT21;<br>CON__P78               | CON__O43790;<br>CON__Q6NT21;<br>CON__P78385;<br>CO | 2;2;2;2  | 1;1;1;1  | 1;1;1;1 |   |   | ;;; | 4 | 2  | 1  | 1  | 0 | 0  | 1 | 2 |
| 92 | CON__P00711                                            | CON__P00711                                        | 4        | 4        | 4       |   |   |     | 1 | 4  | 4  | 4  | 0 | 3  | 0 | 4 |
| 93 | CON__P00761                                            | CON__P00761                                        | 11       | 11       | 11      |   |   |     | 1 | 11 | 11 | 11 | 7 | 8  | 7 | 6 |
| 94 | CON__P02533;<br>CON__Q6IFX2;<br>Q6IFX2;<br>CON__Q61782 | CON__P02533                                        | 18;7;7;4 | 17;7;7;4 | 4;1;1;1 |   |   |     | 4 | 18 | 17 | 4  | 3 | 15 | 2 | 4 |

|    | A                                                      | B                             | C         | D         | E       | F                       | G    | H                                                                                                                                                                          | I | J  | K  | L | M | N  | O | P  |
|----|--------------------------------------------------------|-------------------------------|-----------|-----------|---------|-------------------------|------|----------------------------------------------------------------------------------------------------------------------------------------------------------------------------|---|----|----|---|---|----|---|----|
| 95 | CON__P02538<br>;CON__P4866<br>8;CON__O956<br>78;Q6IFZ8 | CON__P02538;C<br>ON__P48668   | 18;17;7;1 | 12;11;3;1 | 2;1;0;0 |                         |      | ;                                                                                                                                                                          | 4 | 18 | 12 | 2 | 7 | 14 | 8 | 11 |
| 96 | Q5SX49;CON_<br>_P02584;P629<br>62                      | Q5SX49;CON__P<br>02584;P62962 | 1;1;1     | 1;1;1     | 1;1;1   | Profilin;Profilin-<br>1 | Pfn1 | tr Q5SX49 Q5SX49_MOUSE<br>Profilin OS=Mus musculus<br>OX=10090 GN=Pfn1 PE=1<br>SV=1;;sp P62962 PROF1_MO<br>USE Profilin-1 OS=Mus<br>musculus OX=10090 GN=Pfn1<br>PE=1 SV=2 | 3 | 1  | 1  | 1 | 0 | 0  | 1 | 0  |
| 97 | CON__P02662                                            | CON__P02662                   | 6         | 6         | 6       |                         |      |                                                                                                                                                                            | 1 | 6  | 6  | 6 | 3 | 4  | 3 | 5  |
| 98 | CON__P02663                                            | CON__P02663                   | 6         | 6         | 6       |                         |      |                                                                                                                                                                            | 1 | 6  | 6  | 6 | 1 | 6  | 2 | 3  |

|     | A           | B           | C | D | E | F | G | H | I | J | K | L | M | N | O | P |
|-----|-------------|-------------|---|---|---|---|---|---|---|---|---|---|---|---|---|---|
| 99  | CON__P02666 | CON__P02666 | 1 | 1 | 1 |   |   |   | 1 | 1 | 1 | 1 | 1 | 1 | 1 | 1 |
| 100 | CON__P02668 | CON__P02668 | 6 | 6 | 6 |   |   |   | 1 | 6 | 6 | 6 | 0 | 4 | 2 | 4 |
| 101 | CON__P02754 | CON__P02754 | 9 | 9 | 9 |   |   |   | 1 | 9 | 9 | 9 | 3 | 8 | 2 | 8 |

|     | A                                      | B          | C      | D      | E      | F | G | H | I | J  | K  | L  | M  | N  | O  | P  |
|-----|----------------------------------------|------------|--------|--------|--------|---|---|---|---|----|----|----|----|----|----|----|
| 102 | CON_P02769<br>;CON_P0276<br>8-1;P07724 | CON_P02769 | 47;4;1 | 47;4;1 | 47;4;1 |   |   |   | 3 | 47 | 47 | 47 | 34 | 35 | 42 | 35 |
| 103 | CON_P04259                             | CON_P04259 | 17     | 1      | 1      |   |   |   | 1 | 17 | 1  | 1  | 7  | 13 | 8  | 11 |

|     | A                                                                                                                                   | B           | C                                      | D                                      | E                                    | F | G | H | I  | J  | K  | L  | M  | N  | O  | P  |
|-----|-------------------------------------------------------------------------------------------------------------------------------------|-------------|----------------------------------------|----------------------------------------|--------------------------------------|---|---|---|----|----|----|----|----|----|----|----|
|     | CON__P04264<br>;P04104;CON_<br>_Q6IFZ6;Q6IF<br>Z6;CON__H-<br>INV:HIT00001                                                           |             |                                        |                                        |                                      |   |   |   |    |    |    |    |    |    |    |    |
| 104 | 6045                                                                                                                                | CON__P04264 | 27;3;2;2;1                             | 25;2;1;1;1                             | 18;2;0;0;0                           |   |   |   | 5  | 27 | 25 | 18 | 18 | 22 | 15 | 20 |
| 105 | CON__P07477                                                                                                                         | CON__P07477 | 1                                      | 1                                      | 1                                    |   |   |   | 1  | 1  | 1  | 1  | 0  | 0  | 1  | 0  |
|     | CON__P08779<br>;CON__Q9Z2K<br>1;CON__Q3ZA<br>W8;Q9Z2K1;C<br>ON__A2A4G1;<br>B1AQ77;Q614<br>14;CON__P08<br>727;CON__P1<br>9001;CON__P |             |                                        |                                        |                                      |   |   |   |    |    |    |    |    |    |    |    |
| 106 | 35900;CON__                                                                                                                         | CON__P08779 | 17;5;5;5;4;4<br>;4;2;2;2;2;2;<br>2;1;1 | 10;1;1;1;0;0<br>;0;0;0;0;0;0;<br>0;0;0 | 10;1;1;1;0;<br>0;0;0;0;0;0;<br>0;0;0 |   |   |   | 15 | 17 | 10 | 10 | 7  | 14 | 2  | 3  |

|     | A                                                                                                                                 | B           | C                        | D                        | E                        | F | G | H | I | J  | K  | L  | M  | N  | O  | P  |    |
|-----|-----------------------------------------------------------------------------------------------------------------------------------|-------------|--------------------------|--------------------------|--------------------------|---|---|---|---|----|----|----|----|----|----|----|----|
| 107 | CON__P13645<br>;A2A513;CON__P02535-1;P02535;CON__Q7Z3Y7;CON__Q7Z3Z0;CON__Q7Z3Y8;CON__Q148H6;CON__Q7Z3Y9;CON__Q2M2I5;Q8VCW2;Q9Z320 | CON__P13645 | 28;7;7;7;3;2;2;2;1;1;1;1 | 28;7;7;7;3;2;2;2;1;1;1;1 | 25;4;4;4;2;1;1;1;0;0;0;0 |   |   |   |   | 12 | 28 | 28 | 25 | 20 | 24 | 21 | 23 |
| 108 | CON__P13647;CON__Q8VE D5;Q8VED5                                                                                                   | CON__P13647 | 18;3;3                   | 9;0;0                    | 5;0;0                    |   |   |   |   | 3  | 18 | 9  | 5  | 8  | 13 | 8  | 8  |
| 109 | CON__P19013                                                                                                                       | CON__P19013 | 2                        | 1                        | 1                        |   |   |   |   | 1  | 2  | 1  | 1  | 1  | 1  | 1  | 2  |
| 110 | CON__P34955                                                                                                                       | CON__P34955 | 1                        | 1                        | 1                        |   |   |   |   | 1  | 1  | 1  | 1  | 0  | 0  | 1  | 0  |



|     | A           | B           | C  | D  | E  | F | G | H | I | J  | K  | L  | M  | N  | O  | P  |
|-----|-------------|-------------|----|----|----|---|---|---|---|----|----|----|----|----|----|----|
| 111 | CON__P35527 | CON__P35527 | 23 | 23 | 23 |   |   |   | 1 | 23 | 23 | 23 | 17 | 20 | 14 | 15 |

|     | A                                                                             | B                                    | C            | D            | E                | F                                  | G     | H                                                                                                             | I | J  | K  | L  | M  | N  | O  | P  |
|-----|-------------------------------------------------------------------------------|--------------------------------------|--------------|--------------|------------------|------------------------------------|-------|---------------------------------------------------------------------------------------------------------------|---|----|----|----|----|----|----|----|
| 112 | CON_P35908<br>;CON_Q6NX<br>H9;Q6NXH9;C<br>ON_Q7RTS7;<br>CON_Q32M<br>B2;P19246 | CON_P35908                           | 34;3;3;2;2;2 | 34;3;3;2;2;2 | 24;0;0;0;0;<br>0 |                                    |       |                                                                                                               | 6 | 34 | 34 | 24 | 19 | 25 | 17 | 27 |
| 113 | CON_Q0154<br>6;CON_P077<br>44;P07744;CO<br>N_Q8N1N4-<br>2;CON_Q7RT<br>T2      | CON_Q01546                           | 10;4;4;2;2   | 4;0;0;0;0    | 4;0;0;0;0        |                                    |       |                                                                                                               | 5 | 10 | 4  | 4  | 4  | 7  | 3  | 6  |
| 114 | CON_Q0469<br>5;CON_Q9Q<br>WL7;Q9QWL7                                          | CON_Q04695;C<br>ON_Q9QWL7;Q<br>9QWL7 | 10;8;8       | 2;0;0        | 2;0;0            | Keratin, type I<br>cytoskeletal 17 | Krt17 | :::sp Q9QWL7 K1C17_MOUSE<br>Keratin, type I cytoskeletal 17<br>OS=Mus musculus OX=10090<br>GN=Krt17 PE=1 SV=3 | 3 | 10 | 2  | 2  | 3  | 9  | 1  | 2  |
| 115 | CON_Q1RM<br>N8                                                                | CON_Q1RMN8                           | 3            | 3            | 3                |                                    |       |                                                                                                               | 1 | 3  | 3  | 3  | 2  | 1  | 3  | 2  |
| 116 | CON_Q32PJ2                                                                    | CON_Q32PJ2                           | 1            | 1            | 1                |                                    |       |                                                                                                               | 1 | 1  | 1  | 1  | 0  | 0  | 0  | 0  |
| 117 | CON_Q3KUS                                                                     | CON_Q3KUS7                           | 1            | 1            | 1                |                                    |       |                                                                                                               | 1 | 1  | 1  | 1  | 0  | 0  | 0  | 0  |
| 118 | CON_Q5D86                                                                     | CON_Q5D862                           | 1            | 1            | 1                |                                    |       |                                                                                                               | 1 | 1  | 1  | 1  | 0  | 1  | 0  | 1  |
| 119 | CON_Q7Z79<br>4                                                                | CON_Q7Z794                           | 2            | 1            | 1                |                                    |       |                                                                                                               | 1 | 2  | 1  | 1  | 1  | 2  | 2  | 1  |
| 120 | CON_Q86YZ                                                                     | CON_Q86YZ3                           | 2            | 2            | 2                |                                    |       |                                                                                                               | 1 | 2  | 2  | 2  | 0  | 1  | 0  | 0  |

|     | A                    | B                    | C     | D     | E     | F                                                           | G       | H                                                                                                                                                                                                                                                                | I | J | K | L | M | N | O | P |
|-----|----------------------|----------------------|-------|-------|-------|-------------------------------------------------------------|---------|------------------------------------------------------------------------------------------------------------------------------------------------------------------------------------------------------------------------------------------------------------------|---|---|---|---|---|---|---|---|
| 121 | D3YTQ4;O70628        | D3YTQ4;O70628        | 1;1   | 1;1   | 1;1   | High affinity cGMP-specific 3,5-cyclic phosphodiesterase 9A | Pde9a   | tr D3YTQ4 D3YTQ4_MOUSE Phosphodiesterase OS=Mus musculus OX=10090 GN=Pde9a PE=1 SV=1;sp O70628 PDE9A_MOUSE High affinity cGMP-specific 3,5-cyclic phosphodiesterase 9A OS=Mus musculus OX=10090 GN=Pde9a PE=1 SV=1                                               | 2 | 1 | 1 | 1 | 1 | 0 | 0 | 0 |
| 122 | D3YUF5;P97343        | D3YUF5;P97343        | 1;1   | 1;1   | 1;1   | Serine/threonine-protein kinase Kist                        | Uhmk1   | tr D3YUF5 D3YUF5_MOUSE Serine/threonine-protein kinase Kist OS=Mus musculus OX=10090 GN=Uhmk1 PE=1 SV=1;sp P97343 UHMK1_MOUSE Serine/threonine-protein kinase Kist OS=Mus musculus OX=10090 GN=Uhmk1 PE=1 SV=3                                                   | 2 | 1 | 1 | 1 | 0 | 1 | 0 | 0 |
| 123 | D3YUQ5;Q6PDC0        | D3YUQ5;Q6PDC0        | 1;1   | 1;1   | 1;1   | RUN domain-containing protein 3B                            | Rundc3b | tr D3YUQ5 D3YUQ5_MOUSE Gene model 440, (NCBI) OS=Mus musculus OX=10090 GN=Rundc3b PE=1 SV=1;sp Q6PDC0 RUN3B_MOUSE RUN domain-containing protein 3B OS=Mus musculus OX=10090 GN=Rundc3b PE=1 SV=1                                                                 | 2 | 1 | 1 | 1 | 0 | 0 | 0 | 0 |
| 124 | D3YWC7               | D3YWC7               |       | 1     | 1     | 1                                                           | Fam47e  | tr D3YWC7 D3YWC7_MOUSE Family with sequence similarity 47, member E OS=Mus musculus OX=10090 GN=Fam47e PE=4 SV=2                                                                                                                                                 | 1 | 1 | 1 | 1 | 0 | 0 | 0 | 0 |
| 125 | D3YYG2;D3Z7C5;Q60665 | D3YYG2;D3Z7C5;Q60665 | 1;1;1 | 1;1;1 | 1;1;1 | Ski-like protein                                            | Skil    | tr D3YYG2 D3YYG2_MOUSE Ski-like protein (Fragment) OS=Mus musculus OX=10090 GN=Skil PE=1 SV=1;tr D3Z7C5 D3Z7C5_MOUSE Ski-like protein OS=Mus musculus OX=10090 GN=Skil PE=1 SV=1;sp Q60665 SKIL_MOUSE Ski-like protein OS=Mus musculus OX=10090 GN=Skil PE=1 SV= | 3 | 1 | 1 | 1 | 1 | 0 | 0 | 0 |
| 126 | D3Z0M9               | D3Z0M9               |       | 1     | 1     | 1                                                           | Ddx23   | tr D3Z0M9 D3Z0M9_MOUSE DEAD (Asp-Glu-Ala-Asp) box polypeptide 23 OS=Mus musculus OX=10090 GN=Ddx23 PE=1 SV=1                                                                                                                                                     | 1 | 1 | 1 | 1 | 1 | 0 | 0 | 0 |

|     | A                        | B             | C     | D     | E     | F                                                                        | G       | H                                                                                                                                                                                                                                                                                    | I | J | K | L | M | N | O | P |
|-----|--------------------------|---------------|-------|-------|-------|--------------------------------------------------------------------------|---------|--------------------------------------------------------------------------------------------------------------------------------------------------------------------------------------------------------------------------------------------------------------------------------------|---|---|---|---|---|---|---|---|
| 127 | D3Z1A5                   | D3Z1A5        | 1     | 1     | 1     |                                                                          | Adamts6 | tr D3Z1A5 D3Z1A5_MOUSE A disintegrin-like and metallopeptidase (reprolysin type) with thrombospondin type 1 motif, 6 OS=Mus musculus OX=10090 GN=Adamts6 PE=4 SV=1                                                                                                                   | 1 | 1 | 1 | 1 | 0 | 0 | 0 | 0 |
| 128 | D3Z624;E0CZ22<br>2       | D3Z624;E0CZ22 | 1;1   | 1;1   | 1;1   |                                                                          | Mroh1   | tr D3Z624 D3Z624_MOUSE Maestro heat-like repeat family member 1 OS=Mus musculus OX=10090 GN=Mroh1 PE=1 SV=2;tr E0CZ22 E0CZ22_MOUSE Maestro heat-like repeat family member 1 OS=Mus musculus OX=10090 GN=Mroh1 PE=1 SV=1                                                              | 2 | 1 | 1 | 1 | 1 | 0 | 0 | 0 |
| 129 | D3Z6F5;Q032<br>65;D6RJ16 | D3Z6F5;Q03265 | 6;6;1 | 6;6;1 | 6;6;1 | ATP synthase subunit alpha;ATP synthase subunit alpha, mitochondrial     | Atp5a1  | tr D3Z6F5 D3Z6F5_MOUSE ATP synthase subunit alpha OS=Mus musculus OX=10090 GN=Atp5a1 PE=1 SV=1;sp Q03265 ATPA_MOUSE E ATP synthase subunit alpha, mitochondrial OS=Mus musculus OX=10090 GN=Atp5f1a PE=1 SV=1                                                                        | 3 | 6 | 6 | 6 | 0 | 0 | 1 | 3 |
| 130 | D3Z7S3;Q9QY<br>P6        | D3Z7S3;Q9QYP6 | 1;1   | 1;1   | 1;1   | 5-azacytidine-induced protein 2                                          | Azi2    | tr D3Z7S3 D3Z7S3_MOUSE 5-azacytidine-induced protein 2 (Fragment) OS=Mus musculus OX=10090 GN=Azi2 PE=1 SV=1;sp Q9QYP6 AZI2_MOUSE E 5-azacytidine-induced protein 2 OS=Mus musculus OX=10090 GN=Azi2 PE=1 SV=1                                                                       | 2 | 1 | 1 | 1 | 1 | 0 | 0 | 0 |
| 131 | D6RFV1;Q8VD<br>46        | D6RFV1;Q8VD46 | 1;1   | 1;1   | 1;1   | Ankyrin repeat, SAM and basic leucine zipper domain-containing protein 1 | Asz1    | tr D6RFV1 D6RFV1_MOUSE Ankyrin repeat, SAM and basic leucine zipper domain-containing protein 1 OS=Mus musculus OX=10090 GN=Asz1 PE=1 SV=1;sp Q8VD46 ASZ1_MOUSE E Ankyrin repeat, SAM and basic leucine zipper domain-containing protein 1 OS=Mus musculus OX=1009 GN=Asz1 PE=1 SV=1 | 2 | 1 | 1 | 1 | 0 | 1 | 0 | 0 |
| 132 | D6RHK9                   | D6RHK9        | 1     | 1     | 1     |                                                                          | Dgkz    | tr D6RHK9 D6RHK9_MOUSE Diacylglycerol kinase zeta OS=Mus musculus OX=10090 GN=Dgkz PE=1 SV=1                                                                                                                                                                                         | 1 | 1 | 1 | 1 | 0 | 0 | 1 | 0 |

|     | A                           | B                           | C       | D       | E       | F                                                           | G                              | H                                                                                                                                                                                                                                                                                              | I | J | K | L | M | N | O | P |
|-----|-----------------------------|-----------------------------|---------|---------|---------|-------------------------------------------------------------|--------------------------------|------------------------------------------------------------------------------------------------------------------------------------------------------------------------------------------------------------------------------------------------------------------------------------------------|---|---|---|---|---|---|---|---|
| 133 | D6RIK9;Q8CG73               | D6RIK9;Q8CG73               | 1;1     | 1;1     | 1;1     | Protein fantom                                              | Rpgrip1l                       | tr D6RIK9 D6RIK9_MOUSE<br>Protein fantom OS=Mus musculus OX=10090<br>GN=Rpgrip1l PE=1<br>SV=1;sp Q8CG73 FTM_MOUSE<br>E Protein fantom OS=Mus musculus OX=10090<br>GN=Rpgrip1l PE=1 SV=2                                                                                                        | 2 | 1 | 1 | 1 | 0 | 0 | 0 | 1 |
| 134 | D6RIL1                      | D6RIL1                      | 1       | 1       | 1       |                                                             | Nr3c2                          | tr D6RIL1 D6RIL1_MOUSE<br>Mineralocorticoid receptor OS=Mus musculus OX=10090<br>GN=Nr3c2 PE=1 SV=1                                                                                                                                                                                            | 1 | 1 | 1 | 1 | 0 | 1 | 0 | 0 |
| 135 | E9Q6Z0;E9PV12;G3X914;Q9D5V5 | E9Q6Z0;E9PV12;G3X914;Q9D5V5 | 1;1;1;1 | 1;1;1;1 | 1;1;1;1 | Cullin-5                                                    | Cul5                           | tr E9Q6Z0 E9Q6Z0_MOUSE<br>Cullin-5 OS=Mus musculus OX=10090 GN=Cul5 PE=1<br>SV=1;tr E9PV12 E9PV12_MOUSE<br>SE Cullin-5 OS=Mus musculus OX=10090 GN=Cul5 PE=1<br>SV=1;tr G3X914 G3X914_MOUSE<br>USE Cullin-5 OS=Mus musculus OX=10090 GN=Cul5 PE=1<br>SV=1;sp Q9D5V5 CUL5_MOUSE<br>E Cullin-5 O | 4 | 1 | 1 | 1 | 0 | 1 | 0 | 0 |
| 136 | E9PV48;Q64345               | E9PV48;Q64345               | 1;1     | 1;1     | 1;1     | Interferon-induced protein with tetratricopeptide repeats 3 | I830012016Rik;Ifit3            | tr E9PV48 E9PV48_MOUSE<br>Interferon-induced protein with tetratricopeptide repeats 3B OS=Mus musculus OX=10090 GN=Ifit3b PE=1<br>SV=1;sp Q64345 IFIT3_MOUSE<br>E Interferon-induced protein with tetratricopeptide repeats 3 OS=Mus musculus OX=10090<br>GN=Ifit3 PE=1 SV=1                   | 2 | 1 | 1 | 1 | 0 | 0 | 0 | 0 |
| 137 | E9PVT6;Q499F0;Q3UL33        | E9PVT6;Q499F0;Q3UL33        | 1;1;1   | 1;1;1   | 1;1;1   |                                                             | Gm3286;D5Ert577e;E330014E10Rik | tr E9PVT6 E9PVT6_MOUSE<br>Predicted gene 3286 OS=Mus musculus OX=10090<br>GN=Gm3286 PE=4<br>SV=1;tr Q499F0 Q499F0_MOUSE<br>USE D5Ert577e protein OS=Mus musculus OX=10090<br>GN=D5Ert577e PE=2<br>SV=1;tr Q3UL33 Q3UL33_MOUSE<br>USE Predicted gene 3286 OS=Mus musculus OX=10090<br>GN=E33001 | 3 | 1 | 1 | 1 | 0 | 1 | 0 | 0 |
| 138 | E9PX95                      | E9PX95                      | 1       | 1       | 1       |                                                             | Abca17                         | sp E9PX95 ABCAH_MOUSE<br>ATP-binding cassette sub-family A member 17 OS=Mus musculus OX=10090<br>GN=Abca17 PE=1 SV=1                                                                                                                                                                           | 1 | 1 | 1 | 1 | 0 | 1 | 0 | 0 |

|     | A                                                                                         | B                                                                                     | C                       | D                       | E                       | F                                                                     | G                     | H                                                                                                                                                                                                                                                                                                  | I  | J | K | L | M | N | O | P |
|-----|-------------------------------------------------------------------------------------------|---------------------------------------------------------------------------------------|-------------------------|-------------------------|-------------------------|-----------------------------------------------------------------------|-----------------------|----------------------------------------------------------------------------------------------------------------------------------------------------------------------------------------------------------------------------------------------------------------------------------------------------|----|---|---|---|---|---|---|---|
| 139 | Q8VDU4;E9PX<br>IO;P27870                                                                  | Q8VDU4;E9PXIO;<br>P27870                                                              | 1;1;1                   | 1;1;1                   | 1;1;1                   | Proto-<br>oncogene vav                                                | Vav1                  | tr Q8VDU4 Q8VDU4_MOUSE<br>Proto-oncogene vav OS=Mus<br>musculus OX=10090 GN=Vav1<br>PE=1<br>SV=1;tr E9PXIO E9PXIO_MOUS<br>E Proto-oncogene vav OS=Mus<br>musculus OX=10090 GN=Vav1<br>PE=1<br>SV=1;sp P27870 VAV_MOUSE<br>Proto-oncogene vav OS=Mus<br>musculus OX=10090 GN=Vav1<br>PE=1 SV=1      | 3  | 1 | 1 | 1 | 0 | 0 | 1 | 0 |
| 140 | E9PYG9;F6TVP<br>2;Q60710                                                                  | E9PYG9;F6TVP2;<br>Q60710                                                              | 1;1;1                   | 1;1;1                   | 1;1;1                   | Deoxynucleosi<br>de<br>triphosphate<br>triphosphohydr<br>olase SAMHD1 | Samhd1                | tr E9PYG9 E9PYG9_MOUSE<br>Deoxynucleoside triphosphate<br>triphosphohydrolase SAMHD1<br>OS=Mus musculus OX=10090<br>GN=Samhd1 PE=1<br>SV=1;tr F6TVP2 F6TVP2_MOU<br>SE Deoxynucleoside<br>triphosphate<br>triphosphohydrolase SAMHD1<br>(Fragment) OS=Mus musculus<br>OX=10090 GN=Samhd1 PE=1<br>SV | 3  | 1 | 1 | 1 | 0 | 0 | 1 | 0 |
| 141 | E9PYY0;E9Q3Y<br>1;E9Q6X2;E9Q<br>108;E9Q0P9;K<br>7E6F1;F8WIV2<br>;Q60854;E9PZ<br>Q9;E9Q4R2 | E9PYY0;E9Q3Y1;<br>E9Q6X2;E9Q108;<br>E9Q0P9;K7E6F1;<br>F8WIV2;Q60854;<br>E9PZQ9;E9Q4R2 | 2;2;2;2;2;2;<br>2;2;1;1 | 2;2;2;2;2;2;<br>2;2;1;1 | 2;2;2;2;2;2;<br>2;2;1;1 | Serpin B6                                                             | Serpin6a;Se<br>rpinb6 | tr E9PYY0 E9PYY0_MOUSE<br>Serine (or cysteine) peptidase<br>inhibitor, clade B, member 6a<br>(Fragment) OS=Mus musculus<br>OX=10090 GN=Serpinb6a PE=1<br>SV=1;tr E9Q3Y1 E9Q3Y1_MO<br>USE Serine (or cysteine)<br>peptidase inhibitor, clade B,<br>member 6a (Fragment)<br>OS=Mus musculus OX       | 10 | 2 | 2 | 2 | 0 | 0 | 1 | 1 |
| 142 | E9Q0E7;E9Q6I<br>0                                                                         | E9Q0E7;E9Q6I0                                                                         | 1;1                     | 1;1                     | 1;1                     | Vomeronasal<br>type-2 receptor<br>116                                 | Vmn2r115;V<br>mn2r116 | tr E9Q0E7 E9Q0E7_MOUSE<br>Vomeronasal 2, receptor 115<br>OS=Mus musculus OX=10090<br>GN=Vmn2r115 PE=3<br>SV=2;sp E9Q6I0 V2116_MOUSE<br>E Vomeronasal type-2 receptor<br>116 OS=Mus musculus<br>OX=10090 GN=Vmn2r116 PE=1<br>SV=1                                                                   | 2  | 1 | 1 | 1 | 0 | 1 | 0 | 0 |
| 143 | E9Q1K0;Q3ZT<br>31                                                                         | E9Q1K0;Q3ZT31                                                                         | 1;1                     | 1;1                     | 1;1                     | Sorting nexin-<br>25                                                  | Snx25                 | tr E9Q1K0 E9Q1K0_MOUSE<br>Sorting nexin-25 OS=Mus<br>musculus OX=10090 GN=Snx25<br>PE=1<br>SV=1;sp Q3ZT31 SNX25_MOU<br>SE Sorting nexin-25 OS=Mus<br>musculus OX=10090 GN=Snx25<br>PE=1 SV=3                                                                                                       | 2  | 1 | 1 | 1 | 0 | 0 | 1 | 0 |

|     | A                                                                           | B                              | C                 | D                 | E                 | F                           | G                 | H                                                                                                                                                                                                                                                                                                          | I | J | K | L | M | N | O | P |
|-----|-----------------------------------------------------------------------------|--------------------------------|-------------------|-------------------|-------------------|-----------------------------|-------------------|------------------------------------------------------------------------------------------------------------------------------------------------------------------------------------------------------------------------------------------------------------------------------------------------------------|---|---|---|---|---|---|---|---|
| 144 | E9Q1Z0                                                                      | E9Q1Z0                         | 5                 | 1                 | 1                 |                             | 4732456N10<br>Rik | tr E9Q1Z0 E9Q1Z0_MOUSE<br>Keratin 90 OS=Mus musculus<br>OX=10090 GN=Krt90 PE=1<br>SV=1                                                                                                                                                                                                                     | 1 | 5 | 1 | 1 | 1 | 2 | 3 | 3 |
| 145 | E9Q3W4;Q9Q<br>XS1                                                           | E9Q3W4;Q9QXS<br>1              | 1;1               | 1;1               | 1;1               | Plectin                     | Plec              | tr E9Q3W4 E9Q3W4_MOUSE<br>Plectin OS=Mus musculus<br>OX=10090 GN=Plec PE=1<br>SV=1;sp Q9QXS1 PLEC_MOUS<br>E Plectin OS=Mus musculus<br>OX=10090 GN=Plec PE=1 SV=3                                                                                                                                          | 2 | 1 | 1 | 1 | 0 | 0 | 0 | 0 |
| 146 | E9Q600;Q924<br>C6                                                           | E9Q600;Q924C6                  | 1;1               | 1;1               | 1;1               | Lysyl oxidase<br>homolog 4  | Loxl4             | tr E9Q600 E9Q600_MOUSE<br>Lysyl oxidase homolog 4<br>OS=Mus musculus OX=10090<br>GN=Loxl4 PE=1<br>SV=1;sp Q924C6 LOXL4_MOU<br>SE Lysyl oxidase homolog 4<br>OS=Mus musculus OX=10090<br>GN=Loxl4 PE=2 SV=2                                                                                                 | 2 | 1 | 1 | 1 | 0 | 0 | 0 | 0 |
| 147 | E9Q616                                                                      | E9Q616                         | 3                 | 3                 | 3                 |                             | Ahnak             | tr E9Q616 E9Q616_MOUSE<br>AHNAK nucleoprotein<br>(desmoyokin) OS=Mus<br>musculus OX=10090<br>GN=Ahnak PE=1 SV=1                                                                                                                                                                                            | 1 | 3 | 3 | 3 | 0 | 1 | 2 | 0 |
| 148 | E9Q7P6;Q058<br>60                                                           | E9Q7P6;Q05860                  | 3;3               | 3;3               | 3;3               | Formin-1                    | Fmn1              | tr E9Q7P6 E9Q7P6_MOUSE<br>Formin-1 OS=Mus musculus<br>OX=10090 GN=Fmn1 PE=1<br>SV=1;sp Q05860 FMN1_MOU<br>SE Formin-1 OS=Mus musculus<br>OX=10090 GN=Fmn1 PE=1<br>SV=2                                                                                                                                     | 2 | 3 | 3 | 3 | 0 | 0 | 2 | 0 |
| 149 | E9Q8S8;Q3TR<br>M8;E9Q3Z4;D<br>6RFA3;D3Z2E<br>4;E9Q5B5;O08<br>8;E9Q3Z4;D6RFA | E9Q8S8;Q3TRM<br>8;E9Q3Z4;D6RFA | 4;4;3;2;1;1;<br>1 | 4;4;3;2;1;1;<br>1 | 4;4;3;2;1;1;<br>1 | Hexokinase;He<br>xokinase-3 | Hk3               | tr E9Q8S8 E9Q8S8_MOUSE<br>Hexokinase-3 OS=Mus<br>musculus OX=10090 GN=Hk3<br>PE=1<br>SV=1;sp Q3TRM8 HXX3_MOU<br>SE Hexokinase-3 OS=Mus<br>musculus OX=10090 GN=Hk3<br>PE=1<br>SV=2;tr E9Q3Z4 E9Q3Z4_MO<br>USE Hexokinase-3 OS=Mus<br>musculus OX=10090 GN=Hk3<br>PE=1<br>SV=1;tr D6RFA3 D6RFA3_MO<br>USE P | 7 | 4 | 4 | 4 | 0 | 0 | 1 | 2 |
| 150 | F6TUC4                                                                      | F6TUC4                         | 1                 | 1                 | 1                 |                             | Raf1              | tr F6TUC4 F6TUC4_MOUSE<br>RAF proto-oncogene<br>serine/threonine-protein<br>kinase (Fragment) OS=Mus<br>musculus OX=10090 GN=Raf1<br>PE=1 SV=2                                                                                                                                                             | 1 | 1 | 1 | 1 | 0 | 1 | 0 | 0 |

|     | A                           | B                           | C       | D       | E       | F                                                                        | G        | H                                                                                                                                                                                                                                                                   | I | J | K | L | M | N | O | P |
|-----|-----------------------------|-----------------------------|---------|---------|---------|--------------------------------------------------------------------------|----------|---------------------------------------------------------------------------------------------------------------------------------------------------------------------------------------------------------------------------------------------------------------------|---|---|---|---|---|---|---|---|
| 151 | F8VQF9;Q3TLI<br>0           | F8VQF9;Q3TLI0               | 1;1     | 1;1     | 1;1     | Trafficking protein particle complex subunit 10                          | Trappc10 | tr F8VQF9 F8VQF9_MOUSE Trafficking protein particle complex subunit 10 OS=Mus musculus OX=10090 GN=Trappc10 PE=1 SV=1;sp Q3TLI0 TPC10_MOUSE E Trafficking protein particle complex subunit 10 OS=Mus musculus OX=10090 GN=Trappc10 PE=1 SV=2                        | 2 | 1 | 1 | 1 | 0 | 0 | 1 | 0 |
| 152 | F8WIN7;F8WGI9;Q91YY0;P98156 | F8WIN7;F8WGI9;Q91YY0;P98156 | 1;1;1;1 | 1;1;1;1 | 1;1;1;1 | Very low-density lipoprotein receptor                                    | Vldlr    | tr F8WIN7 F8WIN7_MOUSE Very low-density lipoprotein receptor OS=Mus musculus OX=10090 GN=Vldlr PE=1 SV=1;tr F8WGI9 F8WGI9_MOUSE Very low-density lipoprotein receptor OS=Mus musculus OX=10090 GN=Vldlr PE=1 SV=1;tr Q91YY0 Q91YY0_MOUSE Very low-density lipopr    | 4 | 1 | 1 | 1 | 0 | 0 | 1 | 0 |
| 153 | F8WGL3;P18760               | F8WGL3;P18760               | 2;2     | 2;2     | 2;2     | Cofilin-1                                                                | Cfl1     | tr F8WGL3 F8WGL3_MOUSE Cofilin-1 OS=Mus musculus OX=10090 GN=Cfl1 PE=1 SV=1;sp P18760 COF1_MOUSE E Cofilin-1 OS=Mus musculus OX=10090 GN=Cfl1 PE=1 SV=3                                                                                                             | 2 | 2 | 2 | 2 | 0 | 0 | 2 | 0 |
| 154 | F8WGV3                      | F8WGV3                      | 1       | 1       | 1       |                                                                          | Slc26a10 | tr F8WGV3 F8WGV3_MOUSE Solute carrier family 26 member 10 OS=Mus musculus OX=10090 GN=Slc26a10 PE=3 SV=1                                                                                                                                                            | 1 | 1 | 1 | 1 | 0 | 0 | 0 | 0 |
| 155 | G3UWI5;G3UZI8;F8WI37;Q8BRH4 | G3UWI5;G3UZC8;F8WI37;Q8BRH4 | 1;1;1;1 | 1;1;1;1 | 1;1;1;1 | Histone-lysine N-methyltransferase;Histone-lysine N-methyltransferase 2C | Kmt2c    | tr G3UWI5 G3UWI5_MOUSE Histone-lysine N-methyltransferase 2C (Fragment) OS=Mus musculus OX=10090 GN=Kmt2c PE=1 SV=8;tr G3UZC8 G3UZC8_MOUSE Histone-lysine N-methyltransferase 2C (Fragment) OS=Mus musculus OX=10090 GN=Kmt2c PE=1 SV=1;tr F8WI37 F8WI37_MOUSE SE H | 4 | 1 | 1 | 1 | 0 | 1 | 0 | 0 |



|     | A                                         | B                                         | C           | D           | E           | F                                                         | G        | H                                                                                                                                                                                                                                                                | I | J | K | L | M | N | O | P |
|-----|-------------------------------------------|-------------------------------------------|-------------|-------------|-------------|-----------------------------------------------------------|----------|------------------------------------------------------------------------------------------------------------------------------------------------------------------------------------------------------------------------------------------------------------------|---|---|---|---|---|---|---|---|
| 156 | V9GXA5;Q80V18;V9GXE9;G3UW90;V9GX74;Q925H1 | V9GXA5;Q80V18;V9GXE9;G3UW90;V9GX74;Q925H1 | 1;1;1;1;1;1 | 1;1;1;1;1;1 | 1;1;1;1;1;1 | Zinc finger transcription factor Trps1                    | Trps1    | tr V9GXA5 V9GXA5_MOUSE Zinc finger transcription factor Trps1 OS=Mus musculus OX=10090 GN=Trps1 PE=1 SV=1;tr Q80V18 Q80V18_MOUSE Trichorhinophalangeal syndrome I (Human), isoform CRA_a OS=Mus musculus OX=10090 GN=Trps1 PE=1 SV=1;tr V9GXE9 V9GXE9_MOUSE Zinc | 6 | 1 | 1 | 1 | 0 | 0 | 0 | 0 |
| 157 | G3UWG2;Q60610                             | G3UWG2;Q60610                             | 1;1         | 1;1         | 1;1         | T-lymphoma invasion and metastasis-inducing protein 1     | Tiam1    | tr G3UWG2 G3UWG2_MOUSE E T-cell lymphoma invasion and metastasis 1 OS=Mus musculus OX=10090 GN=Tiam1 PE=1 SV=1;sp Q60610 TIAM1_MOUSE T-lymphoma invasion and metastasis-inducing protein 1 OS=Mus musculus OX=10090 GN=Tiam1 PE=1 SV=1                           | 2 | 1 | 1 | 1 | 0 | 0 | 0 | 0 |
| 158 | G3UWR2;G3UYG6;Q6Y7W8                      | G3UWR2;G3UYG6;Q6Y7W8                      | 1;1;1       | 1;1;1       | 1;1;1       | PERQ amino acid-rich with GYF domain-containing protein 2 | Gigyf2   | tr G3UWR2 G3UWR2_MOUSE GRB10-interacting GYF protein 2 OS=Mus musculus OX=10090 GN=Gigyf2 PE=1 SV=1;tr G3UYG6 G3UYG6_MOUSE GRB10-interacting GYF protein 2 OS=Mus musculus OX=10090 GN=Gigyf2 PE=1 SV=1;sp Q6Y7W8 GGYF2_MOUSE GRB10-interacting GYF protein 2 OS | 3 | 1 | 1 | 1 | 1 | 0 | 1 | 0 |
| 159 | G3X960;Q9DBZ9                             | G3X960;Q9DBZ9                             | 1;1         | 1;1         | 1;1         | Rho GTPase-activating protein SYDE1                       | Syde1    | tr G3X960 G3X960_MOUSE MCG5982 OS=Mus musculus OX=10090 GN=Syde1 PE=1 SV=1;sp Q9DBZ9 SYDE1_MOUSE Rho GTPase-activating protein SYDE1 OS=Mus musculus OX=10090 GN=Syde1 PE=1 SV=1                                                                                 | 2 | 1 | 1 | 1 | 0 | 0 | 0 | 0 |
| 160 | G5E899;P22777                             | G5E899;P22777                             | 1;1         | 1;1         | 1;1         | Plasminogen activator inhibitor 1                         | Serpine1 | tr G5E899 G5E899_MOUSE Plasminogen activator inhibitor 1 OS=Mus musculus OX=10090 GN=Serpine1 PE=1 SV=1;sp P22777 PAI1_MOUSE Plasminogen activator inhibitor 1 OS=Mus musculus OX=10090 GN=Serpine1 PE=1 SV=1                                                    | 2 | 1 | 1 | 1 | 1 | 0 | 0 | 0 |

|     | A                                                     | B                                                     | C           | D           | E           | F                                                                                                | G           | H                                                                                                                                                                                                                                                                                                 | I | J | K | L | M | N | O | P |
|-----|-------------------------------------------------------|-------------------------------------------------------|-------------|-------------|-------------|--------------------------------------------------------------------------------------------------|-------------|---------------------------------------------------------------------------------------------------------------------------------------------------------------------------------------------------------------------------------------------------------------------------------------------------|---|---|---|---|---|---|---|---|
| 161 | I7HJS4                                                | I7HJS4                                                | 1           | 1           | 1           |                                                                                                  | Zfp683      | sp I7HJS4 ZN683_MOUSE<br>Tissue-resident T-cell<br>transcription regulator protein<br>ZNF683 OS=Mus musculus<br>OX=10090 GN=Znf683 PE=2<br>SV=1                                                                                                                                                   | 1 | 1 | 1 | 1 | 0 | 0 | 1 | 0 |
| 162 | J3KMT7                                                | J3KMT7                                                | 1           | 1           | 1           |                                                                                                  | Tle3        | tr J3KMT7 J3KMT7_MOUSE<br>Transducin-like enhancer<br>protein 3 OS=Mus musculus<br>OX=10090 GN=Tle3 PE=1 SV=1                                                                                                                                                                                     | 1 | 1 | 1 | 1 | 0 | 0 | 0 | 0 |
| 163 | J3QPE5                                                | J3QPE5                                                | 1           | 1           | 1           |                                                                                                  | Gm5849      | tr J3QPE5 J3QPE5_MOUSE<br>Predicted gene 5849 OS=Mus<br>musculus OX=10090<br>GN=Gm5849 PE=3 SV=1                                                                                                                                                                                                  | 1 | 1 | 1 | 1 | 0 | 0 | 0 | 0 |
| 164 | K4DI62                                                | K4DI62                                                | 1           | 1           | 1           |                                                                                                  | Sp4         | tr K4DI62 K4DI62_MOUSE<br>Transcription factor Sp4<br>OS=Mus musculus OX=10090<br>GN=Sp4 PE=1 SV=2                                                                                                                                                                                                | 1 | 1 | 1 | 1 | 0 | 0 | 0 | 1 |
| 165 | O35344                                                | O35344                                                | 1           | 1           |             | Importin<br>subunit alpha-4                                                                      | Kpna3       | sp O35344 IMA4_MOUSE<br>Importin subunit alpha-4<br>OS=Mus musculus OX=10090<br>GN=Kpna3 PE=1 SV=1                                                                                                                                                                                                | 1 | 1 | 1 | 1 | 0 | 0 | 1 | 0 |
| 166 | Q5SVG5;Q5SV<br>G4;O35643;H<br>3BKMO;H3BIY<br>9;Q9DBG3 | Q5SVG5;Q5SVG4<br>;O35643;H3BKM<br>O;H3BIY9;Q9DBG<br>3 | 2;2;2;1;1;1 | 2;2;2;1;1;1 | 2;2;2;1;1;1 | AP-1 complex<br>subunit beta-<br>1;AP complex<br>subunit<br>beta;AP-2<br>complex<br>subunit beta | Ap1b1;Ap2b1 | tr Q5SVG5 Q5SVG5_MOUSE<br>AP complex subunit beta<br>OS=Mus musculus OX=10090<br>GN=Ap1b1 PE=1<br>SV=1;tr Q5SVG4 Q5SVG4_MO<br>USE AP complex subunit beta<br>OS=Mus musculus OX=10090<br>GN=Ap1b1 PE=1<br>SV=1;sp O35643 AP1B1_MOU<br>SE AP-1 complex subunit beta-<br>1 OS=Mus musculus OX=10090 | 6 | 2 | 2 | 2 | 0 | 0 | 2 | 2 |
| 167 | O88342                                                | O88342                                                | 2           | 2           | 2           | WD repeat-<br>containing<br>protein 1                                                            | Wdr1        | sp O88342 WDR1_MOUSE<br>WD repeat-containing protein<br>1 OS=Mus musculus OX=10090<br>GN=Wdr1 PE=1 SV=3                                                                                                                                                                                           | 1 | 2 | 2 | 2 | 0 | 0 | 1 | 1 |
| 168 | O89053                                                | O89053                                                | 1           | 1           | 1           | Coronin-1A                                                                                       | Coro1a      | sp O89053 COR1A_MOUSE<br>Coronin-1A OS=Mus musculus<br>OX=10090 GN=Coro1a PE=1<br>SV=5                                                                                                                                                                                                            | 1 | 1 | 1 | 1 | 0 | 0 | 1 | 1 |

|     | A             | B             | C     | D     | E   | F                                                                                                             | G     | H                                                                                                                                                                                                                                                      | I | J  | K  | L | M  | N  | O | P |
|-----|---------------|---------------|-------|-------|-----|---------------------------------------------------------------------------------------------------------------|-------|--------------------------------------------------------------------------------------------------------------------------------------------------------------------------------------------------------------------------------------------------------|---|----|----|---|----|----|---|---|
| 169 | P01837        | P01837        | 7     | 7     | 7   | Ig kappa chain<br>C region                                                                                    |       | sp P01837 IGKC_MOUSE<br>Immunoglobulin kappa<br>constant OS=Mus musculus<br>OX=10090 GN=Igkc PE=1 SV=2                                                                                                                                                 | 1 | 7  | 7  | 7 | 3  | 6  | 3 | 4 |
| 170 | P01868;P01869 | P01868;P01869 | 13;13 | 13;13 | 4;4 | Ig gamma-1<br>chain C region<br>secreted<br>form;Ig gamma-<br>1 chain C<br>region,<br>membrane-<br>bound form | Ighg1 | sp P01868 IGHG1_MOUSE Ig<br>gamma-1 chain C region<br>secreted form OS=Mus<br>musculus OX=10090 GN=Ighg1<br>PE=1<br>SV=1;sp P01869 IGH1M_MOU<br>SE Ig gamma-1 chain C region,<br>membrane-bound form<br>OS=Mus musculus OX=10090<br>GN=Ighg1 PE=1 SV=2 | 2 | 13 | 13 | 4 | 10 | 12 | 0 | 1 |

|     | A                                                                                                          | B                                                         | C                        | D                        | E                        | F                                                                                                                 | G                                  | H                                                                                                                                                                                                                                                                      | I  | J  | K  | L  | M | N | O | P |
|-----|------------------------------------------------------------------------------------------------------------|-----------------------------------------------------------|--------------------------|--------------------------|--------------------------|-------------------------------------------------------------------------------------------------------------------|------------------------------------|------------------------------------------------------------------------------------------------------------------------------------------------------------------------------------------------------------------------------------------------------------------------|----|----|----|----|---|---|---|---|
| 171 | P05213;P68373;P68369;A0A2R8VHF3;A0A0M0QA5;P68368;P05214;Q9JJZ2;A0A087WRB4;A0A087WQS4;A0A087WSB0;A0A087WLS5 | P05213;P68373;P68369;A0A2R8VHF3;A0A0A0M0QA5;P68368;P05214 | 10;9;8;6;6;6;6;4;2;2;1;1 | 10;9;8;6;6;6;6;4;2;2;1;1 | 10;9;8;6;6;6;6;4;2;2;1;1 | Tubulin alpha-1B chain;Tubulin alpha-1C chain;Tubulin alpha-1A chain;Tubulin alpha-4A chain;Tubulin alpha-3 chain | Tuba1b;Tuba1c;Tuba1a;Tuba4a;Tuba3a | sp P05213 TBA1B_MOUSE Tubulin alpha-1B chain OS=Mus musculus OX=10090 GN=Tuba1b PE=1 SV=2;sp P68373 TBA1C_MOUSE SE Tubulin alpha-1C chain OS=Mus musculus OX=10090 GN=Tuba1c PE=1 SV=1;sp P68369 TBA1A_MOUSE SE Tubulin alpha-1A chain OS=Mus musculus OX=10090 GN=Tub | 12 | 10 | 10 | 10 | 0 | 1 | 5 | 8 |
| 172 | P08113;F7C312                                                                                              | P08113;F7C312                                             | 4;2                      | 3;2                      | 3;2                      | Endoplasmic reticulum chaperone protein                                                                           | Hsp90b1                            | sp P08113 ENPL_MOUSE Endoplasmic reticulum chaperone protein OS=Mus musculus OX=10090 GN=Hsp90b1 PE=1 SV=2;tr F7C312 F7C312_MOUSE SE Endoplasmic reticulum chaperone protein (Fragment) OS=Mus musculus OX=10090 GN=Hsp90b1 PE=1 SV=1                                  | 2  | 4  | 3  | 3  | 0 | 0 | 1 | 1 |
| 173 | P09411;S4R2M7;P09041                                                                                       | P09411;S4R2M7;P09041                                      | 6;4;4                    | 6;4;4                    | 6;4;4                    | Phosphoglycerate kinase 1;Phosphoglycerate kinase 2                                                               | Pgk1;Pgk2                          | sp P09411 PGK1_MOUSE Phosphoglycerate kinase 1 OS=Mus musculus OX=10090 GN=Pgk1 PE=1 SV=4;tr S4R2M7 S4R2M7_MOUSE SE Phosphoglycerate kinase OS=Mus musculus OX=10090 GN=Pgk1 PE=1 SV=1;sp P09041 PGK2_MOUSE SE Phosphoglycerate kinase 2 OS=Mus musculus OX=10090 GN=P | 3  | 6  | 6  | 6  | 0 | 0 | 1 | 3 |
| 174 | P0DOV1;Q8CGE8                                                                                              | P0DOV1;Q8CGE8                                             | 1;1                      | 1;1                      | 1;1                      | Interferon-gamma-inducible protein 205-A                                                                          | Ifi205a                            | sp P0DOV1 IFI5B_MOUSE Interferon-gamma-inducible protein 205-B OS=Mus musculus OX=10090 GN=Mnda PE=1 SV=1;sp Q8CGE8 IFI5A_MOUSE SE Interferon-gamma-inducible protein 205-A OS=Mus musculus OX=10090 GN=Ifi205a PE=2 SV=1                                              | 2  | 1  | 1  | 1  | 0 | 0 | 0 | 0 |
| 175 | P10126;D3Z318;D3YZ68;P62631                                                                                | P10126;D3Z318;D3YZ68;P62631                               | 5;4;4;3                  | 5;4;4;3                  | 5;4;4;3                  | Elongation factor 1-alpha 2                                                                                       | Eef1a1;Eef1a2                      | sp P10126 EF1A1_MOUSE Elongation factor 1-alpha 1 OS=Mus musculus OX=10090 GN=Eef1a1 PE=1 SV=3;tr D3Z318 D3Z318_MOUSE SE Elongation factor 1-alpha 1 (Fragment) OS=Mus musculus OX=10090 GN=Eef1a1 PE=1 SV=1;tr D3YZ68 D3YZ68_MOUSE SE Elongation factor 1-alpha 1 (Fr | 4  | 5  | 5  | 5  | 0 | 1 | 3 | 2 |



|     | A                                            | B                                         | C           | D           | E           | F                                                               | G                                            | H                                                                                                                                                                                                                                                                | I | J | K | L | M | N | O | P |
|-----|----------------------------------------------|-------------------------------------------|-------------|-------------|-------------|-----------------------------------------------------------------|----------------------------------------------|------------------------------------------------------------------------------------------------------------------------------------------------------------------------------------------------------------------------------------------------------------------|---|---|---|---|---|---|---|---|
| 181 | Q8K469;P11928;Q05BJ7                         | Q8K469;P11928;Q05BJ7                      | 2;2;1       | 2;2;1       | 2;2;1       | 2-5-oligoadenylate synthase 1A                                  | Oas1g;Oas1a                                  | tr Q8K469 Q8K469_MOUSE 2-5 oligoadenylate synthetase 1G OS=Mus musculus OX=10090 GN=Oas1g PE=2 SV=1;sp P11928 OAS1A_MOUSE 2-5-oligoadenylate synthase 1A OS=Mus musculus OX=10090 GN=Oas1a PE=1 SV=2;tr Q05BJ7 Q05BJ7_MOUSE SE 2-5 oligoadenylate synthetase     | 3 | 2 | 2 | 2 | 0 | 0 | 2 | 0 |
| 182 | P14106                                       | P14106                                    | 1           | 1           | 1           | Complement C1q subcomponent subunit B                           | C1qb                                         | sp P14106 C1QB_MOUSE Complement C1q subcomponent subunit B OS=Mus musculus OX=10090 GN=C1qb PE=1 SV=2                                                                                                                                                            | 1 | 1 | 1 | 1 | 1 | 0 | 1 | 1 |
| 183 | P15864;P43274;P43277;I7HFT9;Q07133;P43275    | P15864;P43274;P43277;I7HFT9;Q07133;P43275 | 2;2;2;1;1;1 | 2;2;2;1;1;1 | 2;2;2;1;1;1 | Histone H1.2;Histone H1.4;Histone H1.3;Histone H1t;Histone H1.1 | Hist1h1c;Hist1h1e;Hist1h1d;Hist1h1t;Hist1h1a | sp P15864 H12_MOUSE Histone H1.2 OS=Mus musculus OX=10090 GN=Hist1h1c PE=1 SV=2;sp P43274 H14_MOUSE Histone H1.4 OS=Mus musculus OX=10090 GN=Hist1h1e PE=1 SV=2;sp P43277 H13_MOUSE Histone H1.3 OS=Mus musculus OX=10090 GN=Hist1h1d PE=1 SV=2;tr I7HFT9 I7HFT9 | 6 | 2 | 2 | 2 | 0 | 2 | 0 | 0 |
| 184 | P16294                                       | P16294                                    | 1           | 1           | 1           | Coagulation factor IX;Coagulation factor IXa light              | F9                                           | sp P16294 FA9_MOUSE Coagulation factor IX OS=Mus musculus OX=10090 GN=F9 PE=2 SV=3                                                                                                                                                                               | 1 | 1 | 1 | 1 | 0 | 0 | 0 | 0 |
| 185 | P17742;A0A1L1SRX5;V9GX31;F8V PN3;A0A1L1S ST0 | P17742                                    | 3;1;1;1;1;1 | 3;1;1;1;1;1 | 3;1;1;1;1;1 | Peptidyl-prolyl cis-trans isomerase A;Peptidyl-prolyl cis-trans | Ppia                                         | sp P17742 PPIA_MOUSE Peptidyl-prolyl cis-trans isomerase A OS=Mus musculus OX=10090 GN=Ppia PE=1 SV=2                                                                                                                                                            | 6 | 3 | 3 | 3 | 0 | 0 | 3 | 0 |
| 186 | P17892                                       | P17892                                    | 1           | 1           | 1           | Pancreatic lipase-related protein 2                             | Pnliprp2                                     | sp P17892 LIPR2_MOUSE Pancreatic lipase-related protein 2 OS=Mus musculus OX=10090 GN=Pnliprp2 PE=1 SV=2                                                                                                                                                         | 1 | 1 | 1 | 1 | 0 | 0 | 0 | 0 |
| 187 | P20029                                       | P20029                                    | 3           | 3           | 3           | 78 kDa glucose-regulated protein                                | Hspa5                                        | sp P20029 BIP_MOUSE Endoplasmic reticulum chaperone BiP OS=Mus musculus OX=10090 GN=Hspa5 PE=1 SV=3                                                                                                                                                              | 1 | 3 | 3 | 3 | 0 | 0 | 2 | 1 |

|     | A                                                               | B                 | C                 | D              | E            | F                                                    | G     | H                                                                                                                                                                                                                | I | J  | K  | L  | M | N | O  | P  |
|-----|-----------------------------------------------------------------|-------------------|-------------------|----------------|--------------|------------------------------------------------------|-------|------------------------------------------------------------------------------------------------------------------------------------------------------------------------------------------------------------------|---|----|----|----|---|---|----|----|
| 188 | P20152;A0A0A6YWC8;A2AKJ2;G5E846;A0A2R8W6R6;G3X981;P31001;P15331 | P20152;A0A0A6YWC8 | 12;10;3;1;1;1;1;1 | 11;9;2;1;1;1;1 | 11;9;2;1;1;1 | Vimentin                                             | Vim   | sp P20152 VIME_MOUSE<br>Vimentin OS=Mus musculus<br>OX=10090 GN=Vim PE=1<br>SV=3;tr A0A0A6YWC8 A0A0A6YWC8_MOUSE Vimentin<br>OS=Mus musculus OX=10090<br>GN=Vim PE=1 SV=1                                         | 8 | 12 | 11 | 11 | 0 | 9 | 3  | 2  |
| 189 | P23116                                                          | P23116            | 1                 | 1              | 1            | Eukaryotic translation initiation factor 3 subunit A | Eif3a | sp P23116 EIF3A_MOUSE<br>Eukaryotic translation initiation factor 3 subunit A<br>OS=Mus musculus OX=10090<br>GN=Eif3a PE=1 SV=5                                                                                  | 1 | 1  | 1  | 1  | 0 | 0 | 1  | 0  |
| 190 | Q543K9;P23492;A0A2I3BS22;A0A2I3BQH                              | Q543K9;P23492     | 3;3;1;1           | 3;3;1;1        | 3;3;1;1      | Purine nucleoside phosphorylase                      | Pnp   | tr Q543K9 Q543K9_MOUSE<br>Purine nucleoside phosphorylase OS=Mus musculus OX=10090 GN=Pnp<br>PE=1<br>SV=1;sp P23492 PNPH_MOUSE<br>E Purine nucleoside phosphorylase OS=Mus musculus OX=10090 GN=Pnp<br>PE=1 SV=2 | 4 | 3  | 3  | 3  | 0 | 0 | 1  | 2  |
| 191 | P26151                                                          | P26151            | 13                | 13             | 13           | High affinity immunoglobulin gamma Fc receptor I     | Fcgr1 | sp P26151 FCGR1_MOUSE<br>High affinity immunoglobulin gamma Fc receptor I OS=Mus musculus OX=10090 GN=Fcgr1<br>PE=1 SV=1                                                                                         | 1 | 13 | 13 | 13 | 0 | 0 | 11 | 11 |

|     | A                           | B                           | C       | D       | E       | F                                                                                                                                      | G                        | H                                                                                                                                                                                                                                                                | I | J | K | L | M | N | O | P |
|-----|-----------------------------|-----------------------------|---------|---------|---------|----------------------------------------------------------------------------------------------------------------------------------------|--------------------------|------------------------------------------------------------------------------------------------------------------------------------------------------------------------------------------------------------------------------------------------------------------|---|---|---|---|---|---|---|---|
| 192 | Q8C483;P26638               | Q8C483;P26638               | 1;1     | 1;1     | 1;1     | Serine--tRNA ligase, cytoplasmic                                                                                                       | Sars                     | tr Q8C483 Q8C483_MOUSE Serine--tRNA ligase, cytoplasmic OS=Mus musculus OX=10090 GN=Sars PE=1 SV=1;sp P26638 SYSC_MOUSE Serine--tRNA ligase, cytoplasmic OS=Mus musculus OX=10090 GN=Sars PE=1 SV=3                                                              | 2 | 1 | 1 | 1 | 0 | 1 | 0 | 0 |
| 193 | Q3U9N4;P28798;H3BJE0;H3BJ90 | Q3U9N4;P28798;H3BJE0;H3BJ90 | 4;4;3;3 | 4;4;3;3 | 4;4;3;3 | Granulins;Acrogranin;Granulin-1;Granulin-2;Granulin-3;Granulin-4;Granulin-5;Granulin-6;Granulin-7                                      | Grn                      | tr Q3U9N4 Q3U9N4_MOUSE Granulins OS=Mus musculus OX=10090 GN=Grn PE=1 SV=1;sp P28798 GRN_MOUSE Granulins OS=Mus musculus OX=10090 GN=Grn PE=1 SV=2;tr H3BJE0 H3BJE0_MOUSE Granulins (Fragment) OS=Mus musculus OX=10090 GN=Grn PE=1 SV=1;tr H3BJ90 H3BJ90_MOUSE  | 4 | 4 | 4 | 4 | 2 | 2 | 3 | 3 |
| 194 | P29351                      | P29351                      | 1       | 1       | 1       | Tyrosine-protein phosphatase non-receptor type 6                                                                                       | Ptpn6                    | sp P29351 PTN6_MOUSE Tyrosine-protein phosphatase non-receptor type 6 OS=Mus musculus OX=10090 GN=Ptpn6 PE=1 SV=2                                                                                                                                                | 1 | 1 | 1 | 1 | 0 | 0 | 1 | 1 |
| 195 | P47750                      | P47750                      | 1       | 1       | 1       | Thyrotropin receptor                                                                                                                   | Tshr                     | sp P47750 TSHR_MOUSE Thyrotropin receptor OS=Mus musculus OX=10090 GN=Tshr PE=1 SV=2                                                                                                                                                                             | 1 | 1 | 1 | 1 | 0 | 0 | 1 | 0 |
| 196 | P47964                      | P47964                      | 1       | 1       | 1       | 60S ribosomal protein L36                                                                                                              | Rpl36                    | sp P47964 RL36_MOUSE 60S ribosomal protein L36 OS=Mus musculus OX=10090 GN=Rpl36 PE=1 SV=2                                                                                                                                                                       | 1 | 1 | 1 | 1 | 0 | 0 | 1 | 0 |
| 197 | P48615                      | P48615                      | 1       | 1       | 1       | Protein Wnt-11                                                                                                                         | Wnt11                    | sp P48615 WNT11_MOUSE Protein Wnt-11 OS=Mus musculus OX=10090 GN=Wnt11 PE=2 SV=1                                                                                                                                                                                 | 1 | 1 | 1 | 1 | 0 | 0 | 0 | 0 |
| 198 | P51881;P48962;Q3V132        | P51881;P48962;Q3V132        | 2;2;1   | 2;2;1   | 2;2;1   | ADP/ATP translocase 2;ADP/ATP translocase 2, N-terminally processed;ADP/ATP translocase 1;ADP/ATP translocase 4;ADP/ATP translocase 4, | Slc25a5;Slc25a4;Slc25a31 | sp P51881 ADT2_MOUSE ADP/ATP translocase 2 OS=Mus musculus OX=10090 GN=Slc25a5 PE=1 SV=3;sp P48962 ADT1_MOUSE ADP/ATP translocase 1 OS=Mus musculus OX=10090 GN=Slc25a4 PE=1 SV=4;sp Q3V132 ADT4_MOUSE ADP/ATP translocase 4 OS=Mus musculus OX=10090 GN=Slc25a3 | 3 | 2 | 2 | 2 | 0 | 0 | 1 | 0 |



|     | A                                                                                                        | B                            | C                       | D                       | E                       | F                                                      | G     | H                                                                                                                                                                                                                                                               | I  | J  | K  | L  | M | N | O  | P  |
|-----|----------------------------------------------------------------------------------------------------------|------------------------------|-------------------------|-------------------------|-------------------------|--------------------------------------------------------|-------|-----------------------------------------------------------------------------------------------------------------------------------------------------------------------------------------------------------------------------------------------------------------|----|----|----|----|---|---|----|----|
| 199 | P52480;A0A1L1SU37;A0A1L1SQV8;A0A1L1SSN6;A0A1L1STV8;A0A1L1SUV0;A0A1L1ST52;A0A1L1SVH2;E9Q509;G3X925;P53657 | P52480;A0A1L1SUV0;A0A1L1SQV8 | 18;12;9;8;8;7;3;1;1;1;1 | 18;12;9;8;8;7;3;1;1;1;1 | 18;12;9;8;8;7;3;1;1;1;1 | Pyruvate kinase PKM                                    | Pkm   | sp P52480 KPYM_MOUSE Pyruvate kinase PKM OS=Mus musculus OX=10090 GN=Pkm PE=1 SV=4;tr A0A1L1SU37 A0A1L1SU37_MOUSE Pyruvate kinase PKM (Fragment) OS=Mus musculus OX=10090 GN=Pkm PE=1 SV=1;tr A0A1L1SQV8 A0A1L1SQV8_MOUSE Pyruvate kinase PKM (Fragment) OS=Mus | 11 | 18 | 18 | 18 | 0 | 2 | 14 | 12 |
| 200 | P54276                                                                                                   | P54276                       | 1                       | 1                       | 1                       | DNA mismatch repair protein Msh6                       | Msh6  | sp P54276 MSH6_MOUSE DNA mismatch repair protein Msh6 OS=Mus musculus OX=10090 GN=Msh6 PE=1 SV=3                                                                                                                                                                | 1  | 1  | 1  | 1  | 0 | 1 | 0  | 0  |
| 201 | P56480                                                                                                   | P56480                       | 1                       | 1                       | 1                       | ATP synthase subunit beta, mitochondrial               | Atp5b | sp P56480 ATPB_MOUSE ATP synthase subunit beta, mitochondrial OS=Mus musculus OX=10090 GN=Atp5f1b PE=1 SV=2                                                                                                                                                     | 1  | 1  | 1  | 1  | 0 | 0 | 0  | 1  |
| 202 | P58252                                                                                                   | P58252                       | 4                       | 4                       | 4                       | Elongation factor 2                                    | Eef2  | sp P58252 EF2_MOUSE Elongation factor 2 OS=Mus musculus OX=10090 GN=Eef2 PE=1 SV=2                                                                                                                                                                              | 1  | 4  | 4  | 4  | 0 | 0 | 2  | 1  |
| 203 | V9GXY4;P58801                                                                                            | V9GXY4;P58801                | 1;1                     | 1;1                     | 1;1                     | Receptor-interacting serine/threonine-protein kinase 2 | Ripk2 | tr V9GXY4 V9GXY4_MOUSE Receptor-interacting serine/threonine-protein kinase 2 OS=Mus musculus OX=10090 GN=Ripk2 PE=1 SV=1;sp P58801 RIPK2_MOUSE Receptor-interacting serine/threonine-protein kinase 2 OS=Mus musculus OX=10090 GN=Ripk2 PE=1 SV=1              | 2  | 1  | 1  | 1  | 0 | 0 | 1  | 0  |

|     | A                                                           | B                                  | C                   | D                   | E             | F                                                                                           | G                   | H                                                                                                                                                                                                                                                                                 | I | J  | K  | L | M | N | O  | P  |
|-----|-------------------------------------------------------------|------------------------------------|---------------------|---------------------|---------------|---------------------------------------------------------------------------------------------|---------------------|-----------------------------------------------------------------------------------------------------------------------------------------------------------------------------------------------------------------------------------------------------------------------------------|---|----|----|---|---|---|----|----|
| 204 | P60710;E9Q5F4;E9Q1F2;G3UZ07;E9Q2D1;F8WGM8;A0A0U1RQ96;V9GXQ2 | P60710;E9Q5F4;E9Q1F2;G3UZ07        | 15;12;11;10;5;3;2;1 | 15;12;11;10;5;3;2;1 | 1;1;0;1;0;0;0 | Actin, cytoplasmic 1;Actin, cytoplasmic 1, N-terminally processed                           | Actb;Actg1          | sp P60710 ACTB_MOUSE<br>Actin, cytoplasmic 1 OS=Mus musculus OX=10090 GN=Actb PE=1<br>SV=1;tr E9Q5F4 E9Q5F4_MOUSE USE Actin, cytoplasmic 1 (Fragment) OS=Mus musculus OX=10090 GN=Actb PE=1<br>SV=1;tr E9Q1F2 E9Q1F2_MOUSE USE Actin, cytoplasmic 1 OS=Mus musculus OX=10090 GN=A | 8 | 15 | 15 | 1 | 2 | 6 | 12 | 10 |
| 205 | P61161                                                      | P61161                             | 3                   | 3                   | 3             | Actin-related protein 2                                                                     | Actr2               | sp P61161 ARP2_MOUSE<br>Actin-related protein 2 OS=Mus musculus OX=10090 GN=Actr2 PE=1 SV=1                                                                                                                                                                                       | 1 | 3  | 3  | 3 | 0 | 0 | 1  | 1  |
| 206 | P62806                                                      | P62806                             | 3                   | 3                   | 3             | Histone H4                                                                                  | Hist1h4a            | sp P62806 H4_MOUSE<br>Histone H4 OS=Mus musculus OX=10090 GN=Hist1h4a PE=1 SV=2                                                                                                                                                                                                   | 1 | 3  | 3  | 3 | 3 | 3 | 0  | 1  |
| 207 | P62918                                                      | P62918                             | 1                   | 1                   | 1             | 60S ribosomal protein L8                                                                    | Rpl8                | sp P62918 RL8_MOUSE<br>60S ribosomal protein L8 OS=Mus musculus OX=10090 GN=Rpl8 PE=1 SV=2                                                                                                                                                                                        | 1 | 1  | 1  | 1 | 0 | 0 | 0  | 0  |
| 208 | Q504P4;P63017;D3Z5E2;Q61696;P17879;P17156;P16627            | Q504P4;P63017;D3Z5E2;Q61696;P17879 | 4;4;2;2;1;1         | 4;4;2;2;1;1         | 4;4;2;2;1;1   | Heat shock cognate 71 kDa protein;Heat shock 70 kDa protein 1A;Heat shock 70 kDa protein 1B | Hspa8;Hspa1a;Hspa1b | tr Q504P4 Q504P4_MOUSE<br>Heat shock cognate 71 kDa protein OS=Mus musculus OX=10090 GN=Hspa8 PE=1 SV=1;sp P63017 HSP7C_MOUSE<br>SE Heat shock cognate 71 kDa protein OS=Mus musculus OX=10090 GN=Hspa8 PE=1 SV=1;tr D3Z5E2 D3Z5E2_MOUSE<br>SE Heat shock cognate 71 kDa protei   | 7 | 4  | 4  | 4 | 0 | 0 | 4  | 0  |

|     | A                                                               | B                                                    | C             | D             | E             | F                                                                                                                         | G                       | H                                                                                                                                                                                                                                                                                                                   | I | J  | K | L | M | N | O  | P  |
|-----|-----------------------------------------------------------------|------------------------------------------------------|---------------|---------------|---------------|---------------------------------------------------------------------------------------------------------------------------|-------------------------|---------------------------------------------------------------------------------------------------------------------------------------------------------------------------------------------------------------------------------------------------------------------------------------------------------------------|---|----|---|---|---|---|----|----|
| 209 | P63260;G3UYG0;E9Q606;B1<br>ATY1;F6WX90                          | P63260;G3UYG0                                        | 15;8;7;7;3    | 1;1;0;1;0     | 1;1;0;1;0     | Actin, cytoplasmic 2;Actin, cytoplasmic 2, N-terminally processed                                                         | Actg1                   | sp P63260 ACTG_MOUSE<br>Actin, cytoplasmic 2 OS=Mus musculus OX=10090 GN=Actg1 PE=1<br>SV=1;tr G3UYG0 G3UYG0_MOUSE<br>USE Actin, cytoplasmic 2 OS=Mus musculus OX=10090 GN=Actg1 PE=1 SV=1                                                                                                                          | 5 | 15 | 1 | 1 | 2 | 6 | 11 | 10 |
| 210 | P68134;P68033;P63268;P62737;A0A1D5RM20;D3Z2K3;D3YZY0            | P68134;P68033;P63268;P62737;A0A1D5RM20;D3Z2K3;D3YZY0 | 10;10;9;9;7;7 | 1;1;1;1;1;1;1 | 1;1;1;1;1;1;1 | Actin, alpha skeletal muscle;Actin, alpha cardiac muscle 1;Actin, gamma-enteric smooth muscle;Actin, aortic smooth muscle | Acta1;Actc1;Actg2;Acta2 | sp P68134 ACTS_MOUSE<br>Actin, alpha skeletal muscle OS=Mus musculus OX=10090 GN=Acta1 PE=1<br>SV=1;sp P68033 ACTC_MOUSE<br>E Actin, alpha cardiac muscle 1 OS=Mus musculus OX=10090 GN=Actc1 PE=1<br>SV=1;sp P63268 ACTH_MOUSE<br>E Actin, gamma-enteric smooth muscle OS=Mus musculus OX=10090 GN=Acth1 PE=1 SV=1 | 7 | 10 | 1 | 1 | 1 | 4 | 8  | 6  |
| 211 | P68372;Q9DF9;Q922F4;CON_ENSEMBL:ENSBTAP0000025008;A2AQ07;G3UZR1 | P68372;Q9DF9                                         | 10;7;4;3;3;2  | 1;1;0;0;0;0   | 1;1;0;0;0;0   | Tubulin beta-4B chain;Tubulin beta-4A chain                                                                               | Tubb4b;Tubb4a           | sp P68372 TBB4B_MOUSE<br>Tubulin beta-4B chain OS=Mus musculus OX=10090 GN=Tubb4b PE=1<br>SV=1;sp Q9DF9 TBB4A_MOUSE<br>SE Tubulin beta-4A chain OS=Mus musculus OX=10090 GN=Tubb4a PE=1 SV=3                                                                                                                        | 6 | 10 | 1 | 1 | 0 | 1 | 7  | 6  |
| 212 | P80317                                                          | P80317                                               | 1             | 1             | 1             | T-complex protein 1 subunit zeta                                                                                          | Cct6a                   | sp P80317 TCPZ_MOUSE<br>T-complex protein 1 subunit zeta OS=Mus musculus OX=10090 GN=Cct6a PE=1 SV=3                                                                                                                                                                                                                | 1 | 1  | 1 | 1 | 0 | 0 | 0  | 0  |

|     | A                                      | B                    | C          | D          | E         | F                                                                | G                   | H                                                                                                                                                                                                                                                                           | I | J  | K  | L | M | N | O  | P |
|-----|----------------------------------------|----------------------|------------|------------|-----------|------------------------------------------------------------------|---------------------|-----------------------------------------------------------------------------------------------------------------------------------------------------------------------------------------------------------------------------------------------------------------------------|---|----|----|---|---|---|----|---|
| 213 | P97481                                 | P97481               | 1          | 1          | 1         | Endothelial PAS domain-containing protein 1                      | Epas1               | sp P97481 EPAS1_MOUSE<br>Endothelial PAS domain-containing protein 1 OS=Mus musculus OX=10090 GN=Epas1 PE=1 SV=2                                                                                                                                                            | 1 | 1  | 1  | 1 | 0 | 0 | 0  | 0 |
| 214 | P99024;Q9CFW2;Q7TMM9;Q9ERD7;A0A1D5RM76 | P99024;Q9CFW2;Q7TMM9 | 14;8;8;5;1 | 14;8;8;5;1 | 5;1;1;1;1 | Tubulin beta-5 chain;Tubulin beta-2B chain;Tubulin beta-2A chain | Tubb5;Tubb2b;Tubb2a | sp P99024 TBB5_MOUSE<br>Tubulin beta-5 chain OS=Mus musculus OX=10090 GN=Tubb5 PE=1 SV=1;sp Q9CFW2 TBB2B_MOUSE<br>Tubulin beta-2B chain OS=Mus musculus OX=10090 GN=Tubb2b PE=1 SV=1;sp Q7TMM9 TBB2A_MOUSE<br>Tubulin beta-2A chain OS=Mus musculus OX=10090 GN=Tubb2a PE=1 | 5 | 14 | 14 | 5 | 0 | 1 | 10 | 7 |
| 215 | Q01853                                 | Q01853               | 2          | 2          | 2         | Transitional endoplasmic reticulum ATPase                        | Vcp                 | sp Q01853 TERA_MOUSE<br>Transitional endoplasmic reticulum ATPase OS=Mus musculus OX=10090 GN=Vcp PE=1 SV=4                                                                                                                                                                 | 1 | 2  | 2  | 2 | 0 | 0 | 2  | 0 |
| 216 | Q02053                                 | Q02053               | 1          | 1          | 1         | Ubiquitin-like modifier-activating enzyme 1                      | Uba1                | sp Q02053 UBA1_MOUSE<br>Ubiquitin-like modifier-activating enzyme 1 OS=Mus musculus OX=10090 GN=Uba1 PE=1 SV=1                                                                                                                                                              | 1 | 1  | 1  | 1 | 0 | 0 | 1  | 0 |
| 217 | Q02105                                 | Q02105               | 2          | 2          | 2         | Complement C1q subcomponent subunit C                            | C1qc                | sp Q02105 C1QC_MOUSE<br>Complement C1q subcomponent subunit C OS=Mus musculus OX=10090 GN=C1qc PE=1 SV=2                                                                                                                                                                    | 1 | 2  | 2  | 2 | 0 | 0 | 0  | 1 |
| 218 | Q02257                                 | Q02257               | 1          | 1          | 1         | Junction plakoglobin                                             | Jup                 | sp Q02257 PLAK_MOUSE<br>Junction plakoglobin OS=Mus musculus OX=10090 GN=Jup PE=1 SV=3                                                                                                                                                                                      | 1 | 1  | 1  | 1 | 0 | 1 | 0  | 0 |
| 219 | Q149S1                                 | Q149S1               | 1          | 1          | 1         | Tektin-4                                                         | Tekt4               | sp Q149S1 TEKT4_MOUSE<br>Tektin-4 OS=Mus musculus OX=10090 GN=Tekt4 PE=1 SV=2                                                                                                                                                                                               | 1 | 1  | 1  | 1 | 1 | 0 | 0  | 0 |
| 220 | Q1H9T6                                 | Q1H9T6               | 1          | 1          | 1         | Zinc finger and BTB domain-containing protein 48                 | Zbtb48              | sp Q1H9T6 TZAP_MOUSE<br>Telomere zinc finger-associated protein OS=Mus musculus OX=10090 GN=Zbtb48 PE=1 SV=1                                                                                                                                                                | 1 | 1  | 1  | 1 | 0 | 0 | 0  | 0 |
| 221 | Q2UY11                                 | Q2UY11               | 1          | 1          | 1         | Collagen alpha-1(XXVIII) chain                                   | Col28a1             | sp Q2UY11 COSA1_MOUSE<br>Collagen alpha-1(XXVIII) chain OS=Mus musculus OX=10090 GN=Col28a1 PE=2 SV=1                                                                                                                                                                       | 1 | 1  | 1  | 1 | 1 | 0 | 0  | 0 |

|     | A                    | B             | C     | D     | E     | F                                                       | G              | H                                                                                                                                                                                                                              | I | J | K | L | M | N | O | P |
|-----|----------------------|---------------|-------|-------|-------|---------------------------------------------------------|----------------|--------------------------------------------------------------------------------------------------------------------------------------------------------------------------------------------------------------------------------|---|---|---|---|---|---|---|---|
| 222 | Q9BCZ1;Q31615        | Q9BCZ1;Q31615 | 1;1   | 1;1   | 1;1   |                                                         | H2-T22         | tr Q9BCZ1 Q9BCZ1_MOUSE H2-T22 protein OS=Mus musculus OX=10090 GN=H2-T22 PE=1 SV=1;tr Q31615 Q31615_MOUSE Histocompatibility 2, T region locus 22 OS=Mus musculus OX=10090 GN=H2-T22 PE=1 SV=1                                 | 2 | 1 | 1 | 1 | 0 | 0 | 0 | 1 |
| 223 | Q3TIV5               | Q3TIV5        | 1     | 1     | 1     | Zinc finger CCCH domain-containing protein 15           | Zc3h15         | sp Q3TIV5 ZC3HF_MOUSE Zinc finger CCCH domain-containing protein 15 OS=Mus musculus OX=10090 GN=Zc3h15 PE=1 SV=2                                                                                                               | 1 | 1 | 1 | 1 | 0 | 1 | 0 | 0 |
| 224 | Q3TW96               | Q3TW96        | 2     | 2     | 2     | UDP-N-acetylhexosamine pyrophosphorylase-like protein 1 | Uap111         | sp Q3TW96 UAP1L_MOUSE UDP-N-acetylhexosamine pyrophosphorylase-like protein 1 OS=Mus musculus OX=10090 GN=Uap111 PE=1 SV=1                                                                                                     | 1 | 2 | 2 | 2 | 0 | 0 | 2 | 2 |
| 225 | Q3U288               | Q3U288        | 1     | 1     | 1     | Zinc finger protein 710                                 | Znf710         | sp Q3U288 ZN710_MOUSE Zinc finger protein 710 OS=Mus musculus OX=10090 GN=Znf710 PE=2 SV=1                                                                                                                                     | 1 | 1 | 1 | 1 | 0 | 0 | 0 | 0 |
| 226 | Q3U5Q7               | Q3U5Q7        | 4     | 4     | 4     | UMP-CMP kinase 2, mitochondrial                         | Cmpk2          | sp Q3U5Q7 CMPK2_MOUSE UMP-CMP kinase 2, mitochondrial OS=Mus musculus OX=10090 GN=Cmpk2 PE=1 SV=2                                                                                                                              | 1 | 4 | 4 | 4 | 0 | 0 | 4 | 0 |
| 227 | Q3U687;E9PXF7;D3Z6F0 | Q3U687        | 3;1;1 | 1;0;0 | 1;0;0 |                                                         | 2010002M12 Rik | tr Q3U687 Q3U687_MOUSE Interferon-induced protein with tetratricopeptide repeats 1B-like 2 OS=Mus musculus OX=10090 GN=Ifit1b12 PE=1 SV=1                                                                                      | 3 | 3 | 1 | 1 | 0 | 0 | 1 | 1 |
| 228 | Q3UL97               | Q3UL97        | 1     | 1     | 1     | Activating transcription factor 7-interacting protein 2 | Atf7ip2        | sp Q3UL97 MCAF2_MOUSE Activating transcription factor 7-interacting protein 2 OS=Mus musculus OX=10090 GN=Atf7ip2 PE=2 SV=1                                                                                                    | 1 | 1 | 1 | 1 | 0 | 0 | 1 | 0 |
| 229 | Q3UPZ0               | Q3UPZ0        | 1     | 1     | 1     |                                                         | Sema5a         | tr Q3UPZ0 Q3UPZ0_MOUSE Sema domain, seven thrombospondin repeats (Type 1 and type 1-like), transmembrane domain (TM) and short cytoplasmic domain, (Semaphorin) 5A, isoform CRA_a OS=Mus musculus OX=10090 GN=Sema5a PE=1 SV=1 | 1 | 1 | 1 | 1 | 0 | 1 | 0 | 0 |

|     | A                            | B                            | C       | D       | E       | F                                                | G       | H                                                                                                                                                                                                                                                                         | I | J  | K  | L  | M | N | O  | P |
|-----|------------------------------|------------------------------|---------|---------|---------|--------------------------------------------------|---------|---------------------------------------------------------------------------------------------------------------------------------------------------------------------------------------------------------------------------------------------------------------------------|---|----|----|----|---|---|----|---|
| 230 | Q3UV17                       | Q3UV17                       | 5       | 1       | 1       | Keratin, type II cytoskeletal 2 oral             | Krt76   | sp Q3UV17 K22O_MOUSE<br>Keratin, type II cytoskeletal 2 oral OS=Mus musculus OX=10090 GN=Krt76 PE=1 SV=1                                                                                                                                                                  | 1 | 5  | 1  | 1  | 3 | 3 | 4  | 5 |
| 231 | Q3UV66                       | Q3UV66                       | 1       | 1       | 1       |                                                  | Slfn4   | tr Q3UV66 Q3UV66_MOUSE<br>Schlafen 4 OS=Mus musculus OX=10090 GN=Slfn4 PE=1 SV=1                                                                                                                                                                                          | 1 | 1  | 1  | 1  | 0 | 1 | 0  | 0 |
| 232 | Q3V089                       | Q3V089                       | 1       | 1       | 1       | RNA-binding protein 44                           | Rbm44   | sp Q3V089 RBM44_MOUSE<br>RNA-binding protein 44 OS=Mus musculus OX=10090 GN=Rbm44 PE=1 SV=1                                                                                                                                                                               | 1 | 1  | 1  | 1  | 1 | 0 | 0  | 0 |
| 233 | Q497P3                       | Q497P3                       | 1       | 1       | 1       | Nuclear transcriptional regulator 1-like protein | Nupr1l  | sp Q497P3 NUPR2_MOUSE<br>Nuclear protein 2 OS=Mus musculus OX=10090 GN=Nupr2 PE=3 SV=1                                                                                                                                                                                    | 1 | 1  | 1  | 1  | 0 | 0 | 1  | 1 |
| 234 | Q4VBE4                       | Q4VBE4                       | 1       | 1       | 1       | Pikachurin                                       | Egflam  | sp Q4VBE4 EGFLA_MOUSE<br>Pikachurin OS=Mus musculus OX=10090 GN=Egflam PE=1 SV=1                                                                                                                                                                                          | 1 | 1  | 1  | 1  | 0 | 0 | 0  | 1 |
| 235 | Q5PRF0                       | Q5PRF0                       | 1       | 1       | 1       | HEAT repeat-containing protein 5A                | Heatr5a | sp Q5PRF0 HTR5A_MOUSE<br>HEAT repeat-containing protein 5A OS=Mus musculus OX=10090 GN=Heatr5a PE=1 SV=2                                                                                                                                                                  | 1 | 1  | 1  | 1  | 0 | 1 | 0  | 0 |
| 236 | Q5SXR6;Q68FD5;F6Z1R4         | Q5SXR6;Q68FD5                | 17;17;1 | 17;17;1 | 17;17;1 | Clathrin heavy chain;Clathrin heavy chain 1      | Cltc    | tr Q5SXR6 Q5SXR6_MOUSE<br>Clathrin heavy chain OS=Mus musculus OX=10090 GN=Cltc PE=1 SV=1;sp Q68FD5 CLH1_MOUSE<br>E Clathrin heavy chain 1 OS=Mus musculus OX=10090 GN=Cltc PE=1 SV=3                                                                                     | 3 | 17 | 17 | 17 | 1 | 0 | 12 | 6 |
| 237 | Q61233                       | Q61233                       | 2       | 2       | 2       | Plastin-2                                        | Lcp1    | sp Q61233 PLSL_MOUSE<br>Plastin-2 OS=Mus musculus OX=10090 GN=Lcp1 PE=1 SV=4                                                                                                                                                                                              | 1 | 2  | 2  | 2  | 1 | 1 | 2  | 1 |
| 238 | Q61598;A0A1Y7VLG4;A0A1Y7VL99 | Q61598;A0A1Y7VLG4;A0A1Y7VL99 | 2;1;1   | 2;1;1   | 2;1;1   | Rab GDP dissociation inhibitor beta              | Gdi2    | sp Q61598 GDIB_MOUSE<br>Rab GDP dissociation inhibitor beta OS=Mus musculus OX=10090 GN=Gdi2 PE=1 SV=1;tr A0A1Y7VLG4 A0A1Y7VLG4_MOUSE<br>Rab GDP dissociation inhibitor (Fragment) OS=Mus musculus OX=10090 GN=Gdi2 PE=1 SV=1;tr A0A1Y7VL99 A0A1Y7VL99_MOUSE<br>Rab GDP d | 3 | 2  | 2  | 2  | 0 | 0 | 1  | 0 |

|     | A             | B             | C   | D   | E   | F                                                           | G        | H                                                                                                                                                                                                                            | I | J  | K | L | M | N | O | P |
|-----|---------------|---------------|-----|-----|-----|-------------------------------------------------------------|----------|------------------------------------------------------------------------------------------------------------------------------------------------------------------------------------------------------------------------------|---|----|---|---|---|---|---|---|
| 239 | Q61781        | Q61781        | 11  | 1   | 0   | Keratin, type I cytoskeletal 14                             | Krt14    | sp Q61781 K1C14_MOUSE<br>Keratin, type I cytoskeletal 14<br>OS=Mus musculus OX=10090<br>GN=Krt14 PE=1 SV=2                                                                                                                   | 1 | 11 | 1 | 0 | 3 | 9 | 1 | 3 |
| 240 | Q62167        | Q62167        | 1   | 1   | 1   | ATP-dependent RNA helicase DDX3X                            | Ddx3x    | sp Q62167 DDX3X_MOUSE<br>ATP-dependent RNA helicase<br>DDX3X OS=Mus musculus<br>OX=10090 GN=Ddx3x PE=1<br>SV=3                                                                                                               | 1 | 1  | 1 | 1 | 0 | 0 | 1 | 1 |
| 241 | Q62210        | Q62210        | 1   | 1   | 1   | Baculoviral IAP repeat-containing protein 2                 | Birc2    | sp Q62210 BIRC2_MOUSE<br>Baculoviral IAP repeat-containing protein 2 OS=Mus musculus OX=10090 GN=Birc2<br>PE=1 SV=1                                                                                                          | 1 | 1  | 1 | 1 | 0 | 0 | 1 | 0 |
| 242 | Q62266        | Q62266        | 1   | 1   | 1   | Cornifin-A                                                  | Sprr1a   | sp Q62266 SPR1A_MOUSE<br>Cornifin-A OS=Mus musculus<br>OX=10090 GN=Sprr1a PE=1<br>SV=1                                                                                                                                       | 1 | 1  | 1 | 1 | 0 | 1 | 0 | 0 |
| 243 | Q62465        | Q62465        | 4   | 4   | 4   | Synaptic vesicle membrane protein VAT-1 homolog             | Vat1     | sp Q62465 VAT1_MOUSE<br>Synaptic vesicle membrane protein VAT-1 homolog<br>OS=Mus musculus OX=10090<br>GN=Vat1 PE=1 SV=3                                                                                                     | 1 | 4  | 4 | 4 | 0 | 0 | 1 | 2 |
| 244 | Q64282        | Q64282        | 4   | 4   | 2   | Interferon-induced protein with tetratricopeptide repeats 1 | Ifit1    | sp Q64282 IFIT1_MOUSE<br>Interferon-induced protein with tetratricopeptide repeats 1 OS=Mus musculus OX=10090<br>GN=Ifit1 PE=1 SV=2                                                                                          | 1 | 4  | 4 | 2 | 0 | 0 | 1 | 2 |
| 245 | Q64339        | Q64339        | 1   | 1   | 1   | Ubiquitin-like protein ISG15                                | Isg15    | sp Q64339 ISG15_MOUSE<br>Ubiquitin-like protein ISG15<br>OS=Mus musculus OX=10090<br>GN=Isg15 PE=1 SV=4                                                                                                                      | 1 | 1  | 1 | 1 | 0 | 0 | 1 | 0 |
| 246 | Z4YKW0;Q69Z61 | Z4YKW0;Q69Z61 | 1;1 | 1;1 | 1;1 | PWWP domain-containing protein 2A                           | Pwwp2a   | tr Z4YKW0 Z4YKW0_MOUSE<br>PWWP domain-containing protein 2A OS=Mus musculus<br>OX=10090 GN=Pwwp2a PE=1<br>SV=1;sp Q69Z61 PWP2A_MOUSE<br>PWWP domain-containing protein 2A OS=Mus musculus<br>OX=10090 GN=Pwwp2a PE=2<br>SV=2 | 2 | 1  | 1 | 1 | 1 | 0 | 0 | 0 |
| 247 | Q6P6J0        | Q6P6J0        | 1   | 1   | 1   | tRNA-specific adenosine deaminase 2                         | Adat2    | sp Q6P6J0 ADAT2_MOUSE<br>tRNA-specific adenosine deaminase 2 OS=Mus musculus OX=10090 GN=Adat2<br>PE=1 SV=1                                                                                                                  | 1 | 1  | 1 | 1 | 1 | 0 | 0 | 0 |
| 248 | Q6UKZ0        | Q6UKZ0        | 1   | 1   | 1   |                                                             | Serpnb3d | tr Q6UKZ0 Q6UKZ0_MOUSE<br>MCG8992 OS=Mus musculus<br>OX=10090 GN=Serpnb3d PE=2<br>SV=1                                                                                                                                       | 1 | 1  | 1 | 1 | 0 | 0 | 1 | 0 |

|     | A                            | B                 | C     | D     | E     | F                                                                 | G        | H                                                                                                                                                                                                                                                                                | I | J | K | L | M | N | O | P |
|-----|------------------------------|-------------------|-------|-------|-------|-------------------------------------------------------------------|----------|----------------------------------------------------------------------------------------------------------------------------------------------------------------------------------------------------------------------------------------------------------------------------------|---|---|---|---|---|---|---|---|
| 249 | Q6ZQ12                       | Q6ZQ12            | 1     | 1     | 1     | Ninein-like protein                                               | Ninl     | sp Q6ZQ12 NINL_MOUSE<br>Ninein-like protein OS=Mus musculus OX=10090 GN=Ninl PE=1 SV=3                                                                                                                                                                                           | 1 | 1 | 1 | 1 | 0 | 0 | 0 | 0 |
| 250 | Q6ZQ38                       | Q6ZQ38            | 1     | 1     | 1     | Cullin-associated NEDD8-dissociated protein 1                     | Cand1    | sp Q6ZQ38 CAND1_MOUSE<br>Cullin-associated NEDD8-dissociated protein 1 OS=Mus musculus OX=10090 GN=Cand1 PE=1 SV=2                                                                                                                                                               | 1 | 1 | 1 | 1 | 0 | 0 | 1 | 1 |
| 251 | Q6ZQH8                       | Q6ZQH8            | 1     | 1     | 1     | Nucleoporin NUP188 homolog                                        | Nup188   | sp Q6ZQH8 NU188_MOUSE<br>Nucleoporin NUP188 homolog OS=Mus musculus OX=10090 GN=Nup188 PE=1 SV=2                                                                                                                                                                                 | 1 | 1 | 1 | 1 | 1 | 0 | 0 | 0 |
| 252 | Q769J6;A2ALB3                | Q769J6;A2ALB3     | 2;1   | 2;1   | 2;1   | A disintegrin and metalloproteinase with thrombospondin motifs 13 | Adamts13 | sp Q769J6 ATS13_MOUSE<br>A disintegrin and metalloproteinase with thrombospondin motifs 13 OS=Mus musculus OX=10090 GN=Adamts13 PE=1 SV=1;tr A2ALB3 A2ALB3_MOUSE<br>A disintegrin and metalloproteinase with thrombospondin motifs 13 OS=Mus musculus OX=10090 GN=Adam PE=1 SV=1 | 2 | 2 | 2 | 2 | 1 | 0 | 1 | 0 |
| 253 | Q792Z1                       | Q792Z1            | 1     | 1     | 1     |                                                                   | Try10    | tr Q792Z1 Q792Z1_MOUSE<br>MCG140784 OS=Mus musculus OX=10090 GN=Try10 PE=1 SV=1                                                                                                                                                                                                  | 1 | 1 | 1 | 1 | 1 | 1 | 1 | 0 |
| 254 | Q7TS73                       | Q7TS73            | 1     | 1     | 1     | Filamin-interacting protein FAM101A                               | Fam101a  | sp Q7TS73 RFLA_MOUSE<br>Refilin-A OS=Mus musculus OX=10090 GN=Rflna PE=1 SV=1                                                                                                                                                                                                    | 1 | 1 | 1 | 1 | 0 | 0 | 0 | 0 |
| 255 | Q80X90                       | Q80X90            | 1     | 1     | 1     | Filamin-B                                                         | Flnb     | sp Q80X90 FLNB_MOUSE<br>Filamin-B OS=Mus musculus OX=10090 GN=Flnb PE=1 SV=3                                                                                                                                                                                                     | 1 | 1 | 1 | 1 | 1 | 0 | 0 | 0 |
| 256 | Q80ZS3                       | Q80ZS3            | 1     | 1     | 1     | 28S ribosomal protein S26, mitochondrial                          | Mrps26   | sp Q80ZS3 RT26_MOUSE<br>28S ribosomal protein S26, mitochondrial OS=Mus musculus OX=10090 GN=Mrps26 PE=1 SV=1                                                                                                                                                                    | 1 | 1 | 1 | 1 | 0 | 0 | 1 | 0 |
| 257 | Q8BFR5;A0A0U1RNQ6;A0A0U1RPC4 | Q8BFR5;A0A0U1RNQ6 | 6;4;1 | 6;4;1 | 6;4;1 | Elongation factor Tu, mitochondrial                               | Tufm     | sp Q8BFR5 EFTU_MOUSE<br>Elongation factor Tu, mitochondrial OS=Mus musculus OX=10090 GN=Tufm PE=1 SV=1;tr A0A0U1RNQ6 A0A0U1RNQ6_MOUSE<br>Elongation factor Tu, mitochondrial (Fragment) OS=Mus musculus OX=10090 GN=Tufm PE=1 SV=1                                               | 3 | 6 | 6 | 6 | 0 | 0 | 3 | 1 |



|     | A                        | B                        | C     | D     | E     | F                                                  | G                 | H                                                                                                                                                                                                                                                                                                  | I | J | K | L | M | N | O | P |
|-----|--------------------------|--------------------------|-------|-------|-------|----------------------------------------------------|-------------------|----------------------------------------------------------------------------------------------------------------------------------------------------------------------------------------------------------------------------------------------------------------------------------------------------|---|---|---|---|---|---|---|---|
| 258 | Q8BFX0                   | Q8BFX0                   | 1     | 1     | 1     |                                                    | Polr2k            | tr Q8BFX0 Q8BFX0_MOUSE<br>DNA-directed RNA<br>polymerases I, II, and III<br>subunit RPABC4 OS=Mus<br>musculus OX=10090<br>GN=Polr2k PE=1 SV=1                                                                                                                                                      | 1 | 1 | 1 | 1 | 0 | 0 | 0 | 0 |
| 259 | Q8BFZ3                   | Q8BFZ3                   | 5     | 1     | 1     | Beta-actin-like<br>protein 2                       | Actbl2            | sp Q8BFZ3 ACTBL_MOUSE<br>Beta-actin-like protein 2<br>OS=Mus musculus OX=10090<br>GN=Actbl2 PE=1 SV=1                                                                                                                                                                                              | 1 | 5 | 1 | 1 | 0 | 3 | 4 | 3 |
| 260 | Q8BGL3                   | Q8BGL3                   | 1     | 1     | 1     | Sulfotransferas<br>e                               | 2810007J24R<br>ik | tr Q8BGL3 Q8BGL3_MOUSE<br>Sulfotransferase OS=Mus<br>musculus OX=10090<br>GN=Sult2a8 PE=1 SV=1                                                                                                                                                                                                     | 1 | 1 | 1 | 1 | 0 | 0 | 1 | 0 |
| 261 | Q8BH35                   | Q8BH35                   | 1     | 1     | 1     | Complement<br>component C8<br>beta chain           | C8b               | sp Q8BH35 CO8B_MOUSE<br>Complement component C8<br>beta chain OS=Mus musculus<br>OX=10090 GN=C8b PE=1 SV=1                                                                                                                                                                                         | 1 | 1 | 1 | 1 | 0 | 0 | 0 | 0 |
| 262 | Q8BIJ7                   | Q8BIJ7                   | 1     | 1     | 1     | RUN and FYVE<br>domain-<br>containing<br>protein 1 | Rufy1             | sp Q8BIJ7 RUFY1_MOUSE<br>RUN and FYVE domain-<br>containing protein 1 OS=Mus<br>musculus OX=10090 GN=Rufy1<br>PE=1 SV=1                                                                                                                                                                            | 1 | 1 | 1 | 1 | 0 | 0 | 0 | 0 |
| 263 | Q8BLF1                   | Q8BLF1                   | 1     | 1     | 1     | Neutral<br>cholesterol<br>ester hydrolase          | Nceh1             | sp Q8BLF1 NCEH1_MOUSE<br>Neutral cholesterol ester<br>hydrolase 1 OS=Mus musculus<br>OX=10090 GN=Nceh1 PE=1<br>SV=1                                                                                                                                                                                | 1 | 1 | 1 | 1 | 0 | 0 | 1 | 0 |
| 264 | Q8BMN7;Q8C<br>FB4        | Q8BMN7;Q8CFB<br>4        | 3;3   | 3;3   | 3;3   | Guanylate-<br>binding protein                      | Gbp5              | tr Q8BMN7 Q8BMN7_MOUSE<br>Guanylate-binding protein 5<br>OS=Mus musculus OX=10090<br>GN=Gbp5 PE=1<br>SV=1;sp Q8CFB4 GBP5_MOUS<br>E Guanylate-binding protein 5<br>OS=Mus musculus OX=10090<br>GN=Gbp5 PE=1 SV=2                                                                                    | 2 | 3 | 3 | 3 | 0 | 0 | 1 | 1 |
| 265 | Q8BNQ4;Q8C<br>5J0;Q9D2H6 | Q8BNQ4;Q8C5J0<br>;Q9D2H6 | 1;1;1 | 1;1;1 | 1;1;1 | Transcription<br>factor Sp2                        | Sp2               | tr Q8BNQ4 Q8BNQ4_MOUSE<br>Transcription factor Sp2<br>OS=Mus musculus OX=10090<br>GN=Sp2 PE=1<br>SV=1;tr Q8C5J0 Q8C5J0_MOU<br>SE Transcription factor Sp2<br>OS=Mus musculus OX=10090<br>GN=Sp2 PE=1<br>SV=1;sp Q9D2H6 SP2_MOUSE<br>Transcription factor Sp2<br>OS=Mus musculus OX=10090<br>GN=Sp2 | 3 | 1 | 1 | 1 | 0 | 0 | 0 | 0 |

|     | A             | B             | C   | D   | E   | F                                                         | G        | H                                                                                                                                                                                                  | I | J | K | L | M | N | O | P |
|-----|---------------|---------------|-----|-----|-----|-----------------------------------------------------------|----------|----------------------------------------------------------------------------------------------------------------------------------------------------------------------------------------------------|---|---|---|---|---|---|---|---|
| 266 | Q8BR37        | Q8BR37        | 1   | 1   | 1   | E3 ubiquitin-protein ligase NHLRC1                        | Nhlrc1   | sp Q8BR37 NHLRC1_MOUSE E3 ubiquitin-protein ligase NHLRC1 OS=Mus musculus OX=10090 GN=Nhlrc1 PE=2 SV=1                                                                                             | 1 | 1 | 1 | 1 | 0 | 1 | 0 | 0 |
| 267 | Q8BT60        | Q8BT60        | 1   | 1   | 1   | Copine-3                                                  | Cpne3    | sp Q8BT60 CPNE3_MOUSE Copine-3 OS=Mus musculus OX=10090 GN=Cpne3 PE=1 SV=2                                                                                                                         | 1 | 1 | 1 | 1 | 0 | 0 | 0 | 0 |
| 268 | Q8BVA0;Q99P91 | Q8BVA0;Q99P91 | 1;1 | 1;1 | 1;1 | Transmembrane glycoprotein NMB                            | Gpnmb    | tr Q8BVA0 Q8BVA0_MOUSE Transmembrane glycoprotein NMB OS=Mus musculus OX=10090 GN=Gpnmb PE=1 SV=1;sp Q99P91 GPNMB_MOUSE Transmembrane glycoprotein NMB OS=Mus musculus OX=10090 GN=Gpnmb PE=1 SV=2 | 2 | 1 | 1 | 1 | 1 | 0 | 0 | 0 |
| 269 | Q8BVN8        | Q8BVN8        | 1   | 1   | 1   | Axonemal dynein light intermediate polypeptide 1          | Dnali1   | sp Q8BVN8 IDL1_MOUSE Axonemal dynein light intermediate polypeptide 1 OS=Mus musculus OX=10090 GN=Dnali1 PE=1 SV=1                                                                                 | 1 | 1 | 1 | 1 | 0 | 0 | 1 | 0 |
| 270 | Q8BW70        | Q8BW70        | 1   | 1   | 1   | Ubiquitin carboxyl-terminal hydrolase 38                  | Usp38    | sp Q8BW70 UBP38_MOUSE Ubiquitin carboxyl-terminal hydrolase 38 OS=Mus musculus OX=10090 GN=Usp38 PE=1 SV=2                                                                                         | 1 | 1 | 1 | 1 | 0 | 1 | 0 | 0 |
| 271 | Q8BZQ2        | Q8BZQ2        | 1   | 1   | 1   | Cysteine-rich secretory protein LCCL domain-containing 2  | Crispld2 | sp Q8BZQ2 CRLD2_MOUSE Cysteine-rich secretory protein LCCL domain-containing 2 OS=Mus musculus OX=10090 GN=Crispld2 PE=1 SV=1                                                                      | 1 | 1 | 1 | 1 | 1 | 0 | 1 | 0 |
| 272 | Q8COD9        | Q8COD9        | 1   | 1   | 1   | Centrosomal protein of 68 kDa                             | Cep68    | sp Q8COD9 CEP68_MOUSE Centrosomal protein of 68 kDa OS=Mus musculus OX=10090 GN=Cep68 PE=1 SV=2                                                                                                    | 1 | 1 | 1 | 1 | 0 | 1 | 0 | 0 |
| 273 | Q8COQ4        | Q8COQ4        | 1   | 1   | 1   | Serine/threonine-protein kinase Nek11                     | Nek11    | sp Q8COQ4 NEK11_MOUSE Serine/threonine-protein kinase Nek11 OS=Mus musculus OX=10090 GN=Nek11 PE=2 SV=2                                                                                            | 1 | 1 | 1 | 1 | 0 | 1 | 0 | 0 |
| 274 | Q8C156        | Q8C156        | 1   | 1   | 1   | Condensin complex subunit 2                               | Ncaph    | sp Q8C156 CND2_MOUSE Condensin complex subunit 2 OS=Mus musculus OX=10090 GN=Ncaph PE=1 SV=1                                                                                                       | 1 | 1 | 1 | 1 | 0 | 1 | 0 | 0 |
| 275 | Q8CBB9        | Q8CBB9        | 1   | 1   | 1   | Radical S-adenosyl methionine domain-containing protein 2 | Rsad2    | sp Q8CBB9 RSAD2_MOUSE Radical S-adenosyl methionine domain-containing protein 2 OS=Mus musculus OX=10090 GN=Rsad2 PE=1 SV=1                                                                        | 1 | 1 | 1 | 1 | 0 | 0 | 1 | 0 |

|     | A      | B      | C | D | E | F                                                    | G      | H                                                                                                                              | I | J | K | L | M | N | O | P |
|-----|--------|--------|---|---|---|------------------------------------------------------|--------|--------------------------------------------------------------------------------------------------------------------------------|---|---|---|---|---|---|---|---|
| 276 | Q8CBC6 | Q8CBC6 | 1 | 1 | 1 | Leucine-rich repeat neuronal protein 3               | Lrrn3  | sp Q8CBC6 LRRN3_MOUSE<br>Leucine-rich repeat neuronal protein 3 OS=Mus musculus OX=10090 GN=Lrrn3 PE=2 SV=1                    | 1 | 1 | 1 | 1 | 0 | 0 | 0 | 0 |
| 277 | Q8CIM8 | Q8CIM8 | 1 | 1 | 1 | Integrator complex subunit 4                         | Ints4  | sp Q8CIM8 INT4_MOUSE<br>Integrator complex subunit 4 OS=Mus musculus OX=10090 GN=Ints4 PE=1 SV=1                               | 1 | 1 | 1 | 1 | 1 | 0 | 0 | 0 |
| 278 | Q8K1B8 | Q8K1B8 | 2 | 2 | 2 | Fermitin family homolog 3                            | Fermt3 | sp Q8K1B8 URP2_MOUSE<br>Fermitin family homolog 3 OS=Mus musculus OX=10090 GN=Fermt3 PE=1 SV=1                                 | 1 | 2 | 2 | 2 | 0 | 0 | 0 | 2 |
| 279 | Q8R4B8 | Q8R4B8 | 1 | 1 | 1 | NACHT, LRR and PYD domains-containing protein 3      | Nlrp3  | sp Q8R4B8 NLRP3_MOUSE<br>NACHT, LRR and PYD domains-containing protein 3 OS=Mus musculus OX=10090 GN=Nlrp3 PE=1 SV=1           | 1 | 1 | 1 | 1 | 0 | 0 | 0 | 1 |
| 280 | Q8R5F7 | Q8R5F7 | 1 | 1 | 1 | Interferon-induced helicase C domain-containing      | Ifih1  | sp Q8R5F7 IFIH1_MOUSE<br>Interferon-induced helicase C domain-containing protein 1 OS=Mus musculus OX=10090 GN=Ifih1 PE=1 SV=1 | 1 | 1 | 1 | 1 | 0 | 0 | 1 | 0 |
| 281 | Q8VDD5 | Q8VDD5 | 2 | 2 | 2 | Myosin-9                                             | Myh9   | sp Q8VDD5 MYH9_MOUSE<br>Myosin-9 OS=Mus musculus OX=10090 GN=Myh9 PE=1 SV=4                                                    | 1 | 2 | 2 | 2 | 1 | 1 | 0 | 1 |
| 282 | Q8VDM4 | Q8VDM4 | 1 | 1 | 1 | 26S proteasome non-ATPase regulatory subunit 2       | Psm2   | sp Q8VDM4 PSMD2_MOUSE<br>26S proteasome non-ATPase regulatory subunit 2 OS=Mus musculus OX=10090 GN=Psm2 PE=1 SV=1             | 1 | 1 | 1 | 1 | 0 | 0 | 0 | 1 |
| 283 | Q8VDN4 | Q8VDN4 | 1 | 1 | 1 | Coiled-coil domain-containing protein 92             | Ccdc92 | sp Q8VDN4 CCD92_MOUSE<br>Coiled-coil domain-containing protein 92 OS=Mus musculus OX=10090 GN=Ccdc92 PE=1 SV=1                 | 1 | 1 | 1 | 1 | 0 | 0 | 0 | 1 |
| 284 | Q8VEB1 | Q8VEB1 | 1 | 1 | 1 | G protein-coupled receptor kinase 5                  | Grk5   | sp Q8VEB1 GRK5_MOUSE<br>G protein-coupled receptor kinase 5 OS=Mus musculus OX=10090 GN=Grk5 PE=1 SV=2                         | 1 | 1 | 1 | 1 | 0 | 1 | 0 | 0 |
| 285 | Q91VR5 | Q91VR5 | 1 | 1 | 1 | ATP-dependent RNA helicase                           | Ddx1   | sp Q91VR5 DDX1_MOUSE<br>ATP-dependent RNA helicase DDX1 OS=Mus musculus OX=10090 GN=Ddx1 PE=1 SV=1                             | 1 | 1 | 1 | 1 | 0 | 0 | 1 | 1 |
| 286 | Q91WK2 | Q91WK2 | 1 | 1 | 1 | Eukaryotic translation initiation factor 3 subunit H | Eif3h  | sp Q91WK2 EIF3H_MOUSE<br>Eukaryotic translation initiation factor 3 subunit H OS=Mus musculus OX=10090 GN=Eif3h PE=1 SV=1      | 1 | 1 | 1 | 1 | 1 | 0 | 0 | 0 |

|     | A                                                                    | B                 | C             | D             | E             | F                                                                  | G       | H                                                                                                                                                                                                      | I | J | K | L | M | N | O | P |
|-----|----------------------------------------------------------------------|-------------------|---------------|---------------|---------------|--------------------------------------------------------------------|---------|--------------------------------------------------------------------------------------------------------------------------------------------------------------------------------------------------------|---|---|---|---|---|---|---|---|
| 287 | Q91WL0                                                               | Q91WL0            | 1             | 1             | 1             | Epidermal growth factor receptor kinase substrate 8-like protein 3 | Eps8l3  | sp Q91WL0 ESL3_MOUSE Epidermal growth factor receptor kinase substrate 8-like protein 3 OS=Mus musculus OX=10090 GN=Eps8l3 PE=2 SV=1                                                                   | 1 | 1 | 1 | 1 | 0 | 0 | 0 | 0 |
| 288 | Q91WR3                                                               | Q91WR3            | 1             | 1             | 1             | Activating signal cointegrator 1 complex subunit 2                 | Ascc2   | sp Q91WR3 ASCC2_MOUSE Activating signal cointegrator 1 complex subunit 2 OS=Mus musculus OX=10090 GN=Ascc2 PE=1 SV=1                                                                                   | 1 | 1 | 1 | 1 | 0 | 0 | 0 | 1 |
| 289 | Q91YR5                                                               | Q91YR5            | 1             | 1             | 1             | Methyltransferase-like protein 13                                  | Mettl13 | sp Q91YR5 MET13_MOUSE Methyltransferase-like protein 13 OS=Mus musculus OX=10090 GN=Mettl13 PE=1 SV=1                                                                                                  | 1 | 1 | 1 | 1 | 0 | 0 | 0 | 0 |
| 290 | Q91Z40                                                               | Q91Z40            | 1             | 1             | 1             |                                                                    | Gbp7    | tr Q91Z40 Q91Z40_MOUSE Gbp6 protein OS=Mus musculus OX=10090 GN=Gbp7 PE=1 SV=2                                                                                                                         | 1 | 1 | 1 | 1 | 1 | 0 | 0 | 1 |
| 291 | Q99JY9;A0A087WRA1;A0A087WQ83;A0A087WS98;A0A087WP86;A0A087WQ14;Q641P0 | Q99JY9;A0A087WRA1 | 3;2;1;1;1;1;1 | 3;2;1;1;1;1;1 | 3;2;1;1;1;1;1 | Actin-related protein 3                                            | Actr3   | sp Q99JY9 ARP3_MOUSE Actin-related protein 3 OS=Mus musculus OX=10090 GN=Actr3 PE=1 SV=3;tr A0A087WRA1 A0A087WRA1_MOUSE Actin-related protein 3 (Fragment) OS=Mus musculus OX=10090 GN=Actr3 PE=1 SV=1 | 7 | 3 | 3 | 3 | 0 | 0 | 3 | 2 |
| 292 | Q99ML4                                                               | Q99ML4            | 1             | 1             | 1             | Protein FAM69B                                                     | Fam69b  | sp Q99ML4 DIK1B_MOUSE Divergent protein kinase domain 1B OS=Mus musculus OX=10090 GN=Dipk1b PE=1 SV=1                                                                                                  | 1 | 1 | 1 | 1 | 0 | 0 | 0 | 1 |
| 293 | Q99MR9                                                               | Q99MR9            | 1             | 1             | 1             | Protein phosphatase 1 regulatory subunit 3A                        | Ppp1r3a | sp Q99MR9 PPR3A_MOUSE Protein phosphatase 1 regulatory subunit 3A OS=Mus musculus OX=10090 GN=Ppp1r3a PE=1 SV=2                                                                                        | 1 | 1 | 1 | 1 | 0 | 0 | 1 | 0 |
| 294 | Q99MW3                                                               | Q99MW3            | 1             | 1             | 1             |                                                                    | Pramel1 | sp Q99MW3 PRAL1_MOUSE Preferentially expressed antigen in melanoma-like protein 1 OS=Mus musculus OX=10090 GN=Pramel1 PE=1 SV=1                                                                        | 1 | 1 | 1 | 1 | 0 | 0 | 0 | 0 |
| 295 | Q99N69                                                               | Q99N69            | 1             | 1             | 1             | Leupaxin                                                           | Lpxn    | sp Q99N69 LPXN_MOUSE Leupaxin OS=Mus musculus OX=10090 GN=Lpxn PE=1 SV=2                                                                                                                               | 1 | 1 | 1 | 1 | 0 | 0 | 0 | 1 |
| 296 | Q99PT1                                                               | Q99PT1            | 1             | 1             | 1             | Rho GDP-dissociation inhibitor 1                                   | Arhgdia | sp Q99PT1 GDIR1_MOUSE Rho GDP-dissociation inhibitor 1 OS=Mus musculus OX=10090 GN=Arhgdia PE=1 SV=3                                                                                                   | 1 | 1 | 1 | 1 | 0 | 0 | 1 | 0 |

|     | A      | B      | C | D | E | F                                                                                   | G                 | H                                                                                                                                               | I | J | K | L | M | N | O | P |   |
|-----|--------|--------|---|---|---|-------------------------------------------------------------------------------------|-------------------|-------------------------------------------------------------------------------------------------------------------------------------------------|---|---|---|---|---|---|---|---|---|
| 297 | Q9CPN9 | Q9CPN9 | 1 | 1 | 1 |                                                                                     | 2210010C04<br>Rik | tr Q9CPN9 Q9CPN9_MOUSE<br>RIKEN cDNA 2210010C04 gene<br>OS=Mus musculus OX=10090<br>GN=2210010C04Rik PE=1 SV=1                                  | 1 | 1 | 1 | 1 | 1 | 1 | 1 | 1 | 1 |
| 298 | Q9CQI6 | Q9CQI6 | 1 | 1 | 1 | Coactosin-like<br>protein                                                           | Cotl1             | sp Q9CQI6 COTL1_MOUSE<br>Coactosin-like protein OS=Mus<br>musculus OX=10090 GN=Cotl1<br>PE=1 SV=3                                               | 1 | 1 | 1 | 1 | 0 | 0 | 1 | 0 | 0 |
| 299 | Q9D5T2 | Q9D5T2 | 1 | 1 | 1 |                                                                                     | 4921524L21R<br>ik | tr Q9D5T2 Q9D5T2_MOUSE<br>MCG15536 OS=Mus musculus<br>OX=10090 GN=4921524L21Rik<br>PE=2 SV=1                                                    | 1 | 1 | 1 | 1 | 0 | 0 | 0 | 0 | 1 |
| 300 | Q9D5T7 | Q9D5T7 | 1 | 1 | 1 | HORMA<br>domain-<br>containing<br>protein 1                                         | Hormad1           | sp Q9D5T7 HORM1_MOUSE<br>HORMA domain-containing<br>protein 1 OS=Mus musculus<br>OX=10090 GN=Hormad1 PE=1<br>SV=1                               | 1 | 1 | 1 | 1 | 0 | 0 | 0 | 0 | 0 |
| 301 | Q9D6K8 | Q9D6K8 | 1 | 1 | 1 | FUN14 domain-<br>containing<br>protein 2                                            | Fundc2            | sp Q9D6K8 FUND2_MOUSE<br>FUN14 domain-containing<br>protein 2 OS=Mus musculus<br>OX=10090 GN=Fundc2 PE=1<br>SV=1                                | 1 | 1 | 1 | 1 | 0 | 1 | 1 | 1 | 0 |
| 302 | Q9D8B7 | Q9D8B7 | 1 | 1 | 1 | Junctional<br>adhesion<br>molecule C                                                | Jam3              | sp Q9D8B7 JAM3_MOUSE<br>Junctional adhesion molecule<br>C OS=Mus musculus OX=10090<br>GN=Jam3 PE=1 SV=2                                         | 1 | 1 | 1 | 1 | 1 | 0 | 0 | 0 | 0 |
| 303 | Q9DBC7 | Q9DBC7 | 1 | 1 | 1 | cAMP-<br>dependent<br>protein kinase<br>type I-alpha<br>regulatory<br>subunit;cAMP- | Prkar1a           | sp Q9DBC7 KAP0_MOUSE<br>cAMP-dependent protein<br>kinase type I-alpha regulatory<br>subunit OS=Mus musculus<br>OX=10090 GN=Prkar1a PE=1<br>SV=3 | 1 | 1 | 1 | 1 | 0 | 0 | 1 | 0 |   |
| 304 | Q9DBU5 | Q9DBU5 | 1 | 1 | 1 | E3 ubiquitin-<br>protein ligase<br>RNF6                                             | Rnf6              | sp Q9DBU5 RNF6_MOUSE E3<br>ubiquitin-protein ligase RNF6<br>OS=Mus musculus OX=10090<br>GN=Rnf6 PE=1 SV=1                                       | 1 | 1 | 1 | 1 | 0 | 1 | 0 | 0 | 0 |
| 305 | Q9DCD0 | Q9DCD0 | 7 | 7 | 7 | 6-<br>phosphoglucon<br>ate<br>dehydrogenase<br>,<br>decarboxylatin                  | Pgd               | sp Q9DCD0 6PGD_MOUSE 6-<br>phosphogluconate<br>dehydrogenase,<br>decarboxylating OS=Mus<br>musculus OX=10090 GN=Pgd<br>PE=1 SV=3                | 1 | 7 | 7 | 7 | 0 | 0 | 5 | 6 |   |
| 306 | Q9DCH4 | Q9DCH4 | 1 | 1 | 1 | Eukaryotic<br>translation<br>initiation factor<br>3 subunit F                       | Eif3f             | sp Q9DCH4 EIF3F_MOUSE<br>Eukaryotic translation<br>initiation factor 3 subunit F<br>OS=Mus musculus OX=10090<br>GN=Eif3f PE=1 SV=2              | 1 | 1 | 1 | 1 | 0 | 0 | 0 | 0 | 0 |

|     | A             | B             | C   | D   | E   | F                                                     | G         | H                                                                                                                                                           | I | J | K | L | M | N | O | P |
|-----|---------------|---------------|-----|-----|-----|-------------------------------------------------------|-----------|-------------------------------------------------------------------------------------------------------------------------------------------------------------|---|---|---|---|---|---|---|---|
| 307 | Q9EQH3        | Q9EQH3        | 3   | 3   | 3   | Vacuolar protein sorting-associated protein 35        | Vps35     | sp Q9EQH3 VPS35_MOUSE<br>Vacuolar protein sorting-associated protein 35 OS=Mus musculus OX=10090 GN=Vps35 PE=1 SV=1                                         | 1 | 3 | 3 | 3 | 0 | 0 | 1 | 1 |
| 308 | Q9ESY9        | Q9ESY9        | 1   | 1   | 1   | Gamma-interferon-inducible lysosomal thiol reductase  | lfi30     | sp Q9ESY9 GILT_MOUSE<br>Gamma-interferon-inducible lysosomal thiol reductase OS=Mus musculus OX=10090 GN=lfi30 PE=1 SV=3                                    | 1 | 1 | 1 | 1 | 0 | 0 | 1 | 0 |
| 309 | Q9JHU4        | Q9JHU4        | 2   | 2   | 2   | Cytoplasmic dynein 1 heavy chain 1                    | Dync1h1   | sp Q9JHU4 DYHC1_MOUSE<br>Cytoplasmic dynein 1 heavy chain 1 OS=Mus musculus OX=10090 GN=Dync1h1 PE=1 SV=2                                                   | 1 | 2 | 2 | 2 | 0 | 0 | 1 | 1 |
| 310 | Q9JHY3        | Q9JHY3        | 1   | 1   | 1   | WAP four-disulfide core domain protein 12             | Wfdc12    | sp Q9JHY3 WFD12_MOUSE<br>WAP four-disulfide core domain protein 12 OS=Mus musculus OX=10090 GN=Wfdc12 PE=2 SV=1                                             | 1 | 1 | 1 | 1 | 0 | 0 | 0 | 0 |
| 311 | Q9JKF1        | Q9JKF1        | 6   | 6   | 6   | Ras GTPase-activating-like protein IQGAP1             | lqgap1    | sp Q9JKF1 IQGA1_MOUSE<br>Ras GTPase-activating-like protein IQGAP1 OS=Mus musculus OX=10090 GN=lqgap1 PE=1 SV=2                                             | 1 | 6 | 6 | 6 | 0 | 1 | 3 | 1 |
| 312 | Q9JL04        | Q9JL04        | 1   | 1   | 1   | Formin-2                                              | Fmn2      | sp Q9JL04 FMN2_MOUSE<br>Formin-2 OS=Mus musculus OX=10090 GN=Fmn2 PE=1 SV=2                                                                                 | 1 | 1 | 1 | 1 | 0 | 0 | 1 | 0 |
| 313 | Q9JLB9        | Q9JLB9        | 1   | 1   | 1   | Nectin-3                                              | Pvr13     | sp Q9JLB9 NECT3_MOUSE<br>Nectin-3 OS=Mus musculus OX=10090 GN=Nectin3 PE=1 SV=1                                                                             | 1 | 1 | 1 | 1 | 1 | 0 | 0 | 0 |
| 314 | Q9R0T7;Q9QUK9 | Q9R0T7;Q9QUK9 | 1;1 | 1;1 | 1;1 |                                                       | Try4;Try5 | tr Q9R0T7 Q9R0T7_MOUSE<br>MCG15085 OS=Mus musculus OX=10090 GN=Try4 PE=1 SV=1;tr Q9QUK9 Q9QUK9_MOUSE<br>MCG15083 OS=Mus musculus OX=10090 GN=Try5 PE=1 SV=1 | 2 | 1 | 1 | 1 | 0 | 0 | 0 | 0 |
| 315 | Q9QZM4        | Q9QZM4        | 1   | 1   | 1   | Tumor necrosis factor receptor superfamily member 10B | Tnfrsf10b | sp Q9QZM4 TR10B_MOUSE<br>Tumor necrosis factor receptor superfamily member 10B OS=Mus musculus OX=10090 GN=Tnfrsf10b PE=2 SV=3                              | 1 | 1 | 1 | 1 | 0 | 1 | 0 | 0 |
| 316 | Q9WTJ2        | Q9WTJ2        | 1   | 1   | 1   | Putative transcription factor Ovo-like 1              | Ovol1     | sp Q9WTJ2 OVOL1_MOUSE<br>Putative transcription factor Ovo-like 1 OS=Mus musculus OX=10090 GN=Ovol1 PE=2 SV=1                                               | 1 | 1 | 1 | 1 | 0 | 0 | 0 | 0 |
| 317 | Q9WUM4        | Q9WUM4        | 1   | 1   | 1   | Coronin-1C                                            | Coro1c    | sp Q9WUM4 COR1C_MOUSE<br>Coronin-1C OS=Mus musculus OX=10090 GN=Coro1c PE=1 SV=2                                                                            | 1 | 1 | 1 | 1 | 0 | 0 | 1 | 0 |

|     | A                                               | B                                               | C       | D       | E       | F                                                            | G     | H                                                                                                                                                                                                                                                                                     | I | J | K | L | M | N | O | P |
|-----|-------------------------------------------------|-------------------------------------------------|---------|---------|---------|--------------------------------------------------------------|-------|---------------------------------------------------------------------------------------------------------------------------------------------------------------------------------------------------------------------------------------------------------------------------------------|---|---|---|---|---|---|---|---|
| 318 | Q9Z0E6                                          | Q9Z0E6                                          | 2       | 2       | 2       | Interferon-induced guanylate-binding protein 2               | Gbp2  | sp Q9Z0E6 GBP2_MOUSE<br>Guanylate-binding protein 2<br>OS=Mus musculus OX=10090<br>GN=Gbp2 PE=1 SV=1                                                                                                                                                                                  | 1 | 2 | 2 | 2 | 0 | 0 | 1 | 1 |
| 319 | Q9Z0Y7                                          | Q9Z0Y7                                          | 1       | 1       | 1       | Insulin receptor substrate 4                                 | Irs4  | sp Q9Z0Y7 IRS4_MOUSE<br>Insulin receptor substrate 4<br>OS=Mus musculus OX=10090<br>GN=Irs4 PE=1 SV=2                                                                                                                                                                                 | 1 | 1 | 1 | 1 | 0 | 1 | 0 | 0 |
| 320 | Q9Z1Q5                                          | Q9Z1Q5                                          | 1       | 1       | 1       | Chloride intracellular channel protein 1                     | Clic1 | sp Q9Z1Q5 CLIC1_MOUSE<br>Chloride intracellular channel protein 1 OS=Mus musculus<br>OX=10090 GN=Clic1 PE=1 SV=3                                                                                                                                                                      | 1 | 1 | 1 | 1 | 0 | 0 | 1 | 1 |
| 321 | Q9Z1R9                                          | Q9Z1R9                                          | 1       | 1       | 1       |                                                              | Prss1 | tr Q9Z1R9 Q9Z1R9_MOUSE<br>MCG124046 OS=Mus musculus<br>OX=10090 GN=Prss1 PE=1<br>SV=1                                                                                                                                                                                                 | 1 | 1 | 1 | 1 | 0 | 1 | 1 | 1 |
| 322 | Q9Z1S0                                          | Q9Z1S0                                          | 1       | 1       | 1       | Mitotic checkpoint serine/threonine-protein kinase BUB1 beta | Bub1b | sp Q9Z1S0 BUB1B_MOUSE<br>Mitotic checkpoint serine/threonine-protein kinase BUB1 beta OS=Mus musculus OX=10090<br>GN=Bub1b PE=1 SV=2                                                                                                                                                  | 1 | 1 | 1 | 1 | 1 | 0 | 0 | 0 |
| 323 | REV_A0A087WP74;REV_Q5DTW7                       | REV_A0A087WP74;REV_Q5DTW7                       | 1;1     | 1;1     | 1;1     |                                                              |       | tr A0A087WP74 A0A087WP74_MOUSE<br>Retroelement silencing factor 1 OS=Mus musculus OX=10090 GN=Resf1<br>PE=1<br>SV=1;sp Q5DTW7 K1551_MOUSE<br>Uncharacterized protein KIAA1551 OS=Mus musculus<br>OX=10090 GN=Kiaa1551 PE=1<br>SV=2                                                    | 2 | 1 | 1 | 1 | 0 | 0 | 0 | 1 |
| 324 | REV_F6YX19;REV_A0A087WSN5;REV_Q99LV7;REV_F7DFD7 | REV_F6YX19;REV_A0A087WSN5;REV_Q99LV7;REV_F7DFD7 | 1;1;1;1 | 1;1;1;1 | 1;1;1;1 |                                                              |       | tr F6YX19 F6YX19_MOUSE<br>Phosphatidylinositol-glycan biosynthesis class X protein<br>OS=Mus musculus OX=10090<br>GN=Pigx PE=1<br>SV=1;tr A0A087WSN5 A0A087WSN5_MOUSE<br>Phosphatidylinositol-glycan biosynthesis class X protein<br>OS=Mus musculus OX=10090<br>GN=Pigx PE=1 SV=1;sp | 4 | 1 | 1 | 1 | 0 | 0 | 0 | 0 |

|     | A                                                                                                          | B                                                                                                       | C           | D           | E           | F | G | H                                                                                                                                                                                                                                                                                                 | I | J | K | L | M | N | O | P |
|-----|------------------------------------------------------------------------------------------------------------|---------------------------------------------------------------------------------------------------------|-------------|-------------|-------------|---|---|---------------------------------------------------------------------------------------------------------------------------------------------------------------------------------------------------------------------------------------------------------------------------------------------------|---|---|---|---|---|---|---|---|
| 325 | REV_P51174;<br>REV_A0A0R4<br>J083                                                                          | REV_P51174;RE<br>V__A0A0R4J083                                                                          | 1;1         | 1;1         | 1;1         |   |   | sp P51174 ACADL_MOUSE<br>Long-chain specific acyl-CoA<br>dehydrogenase, mitochondrial<br>OS=Mus musculus OX=10090<br>GN=Acadl PE=1<br>SV=2;tr A0A0R4J083 A0A0R4J<br>083_MOUSE Long-chain-<br>specific acyl-CoA<br>dehydrogenase, mitochondrial<br>OS=Mus musculus OX=10090<br>GN=Acadl PE=1 SV=1  | 2 | 1 | 1 | 1 | 1 | 0 | 0 | 0 |
| 326 | REV_A0A140<br>LIN9;REV_Q8<br>BW94;REV_A<br>0A140LI99;RE<br>V__E9Q0T8;R<br>EV_A0A087<br>WR13;REV_L<br>7N1Y0 | REV_A0A140LI<br>N9;REV_Q8BW<br>94;REV__A0A14<br>0LI99;REV__E9Q<br>0T8;REV_A0A0<br>87WR13;REV_L<br>7N1Y0 | 2;2;1;1;1;1 | 2;2;1;1;1;1 | 2;2;1;1;1;1 |   |   | tr A0A140LIN9 A0A140LIN9_<br>MOUSE Dynein heavy chain 3,<br>axonemal OS=Mus musculus<br>OX=10090 GN=Dnah3 PE=1<br>SV=2;sp Q8BW94 DYH3_MOU<br>SE Dynein heavy chain 3,<br>axonemal OS=Mus musculus<br>OX=10090 GN=Dnah3 PE=1<br>SV=2;tr A0A140LI99 A0A140LI<br>99_MOUSE Dynein heavy<br>chain 3, a | 6 | 2 | 2 | 2 | 0 | 0 | 0 | 1 |
| 327 | REV_A0A1L1<br>SR77;REV_D<br>3YYM4                                                                          | REV_A0A1L1SR<br>77;REV_D3YYM<br>4                                                                       | 1;1         | 1;1         | 1;1         |   |   | tr A0A1L1SR77 A0A1L1SR77_<br>MOUSE WD repeat-containing<br>protein 72 OS=Mus musculus<br>OX=10090 GN=Wdr72 PE=1<br>SV=1;sp D3YYM4 WDR72_MO<br>USE WD repeat-containing<br>protein 72 OS=Mus musculus<br>OX=10090 GN=Wdr72 PE=1<br>SV=1                                                            | 2 | 1 | 1 | 1 | 0 | 0 | 0 | 1 |
| 328 | REV_Q9D2Z8<br>;REV_A0A1Y<br>7VK29                                                                          | REV_Q9D2Z8;R<br>EV_A0A1Y7VK2<br>9                                                                       | 1;1         | 1;1         | 1;1         |   |   | sp Q9D2Z8 KIF12_MOUSE<br>Kinesin-like protein KIF12<br>OS=Mus musculus OX=10090<br>GN=Kif12 PE=1<br>SV=1;tr A0A1Y7VK29 A0A1Y7<br>VK29_MOUSE Kinesin-like<br>protein OS=Mus musculus<br>OX=10090 GN=Kif12 PE=1 SV=1                                                                                | 2 | 1 | 1 | 1 | 0 | 0 | 0 | 0 |
| 329 | REV_A2A9T1                                                                                                 | REV_A2A9T1                                                                                              |             | 1           | 1           | 1 |   | tr A2A9T1 A2A9T1_MOUSE<br>TANK-binding kinase 1-binding<br>protein 1 (Fragment) OS=Mus<br>musculus OX=10090<br>GN=Tbkbp1 PE=1 SV=1                                                                                                                                                                | 1 | 1 | 1 | 1 | 0 | 0 | 0 | 1 |
| 330 | REV_A2AKS7                                                                                                 | REV_A2AKS7                                                                                              |             | 1           | 1           | 1 |   | tr A2AKS7 A2AKS7_MOUSE<br>Cadherin 17, isoform CRA_a<br>OS=Mus musculus OX=10090<br>GN=Cdh17 PE=1 SV=1                                                                                                                                                                                            | 1 | 1 | 1 | 1 | 0 | 0 | 0 | 1 |



|     | A                                                           | B                                                       | C       | D       | E       | F | G | H                                                                                                                                                                                                                                                                                                   | I | J | K | L | M | N | O | P |
|-----|-------------------------------------------------------------|---------------------------------------------------------|---------|---------|---------|---|---|-----------------------------------------------------------------------------------------------------------------------------------------------------------------------------------------------------------------------------------------------------------------------------------------------------|---|---|---|---|---|---|---|---|
| 331 | REV_A2BFU6<br>;REV_A2AR<br>W3;REV_E9<br>QAG4                | REV_A2BFU6;R<br>EV_A2ARW3;R<br>EV_E9QAG4                | 1;1;1   | 1;1;1   | 1;1;1   |   |   | tr A2BFU6 A2BFU6_MOUSE<br>Predicted gene 14406 OS=Mus<br>musculus OX=10090<br>GN=Gm14406 PE=4<br>SV=1;tr A2ARW3 A2ARW3_M<br>OUSE Predicted gene 14444<br>OS=Mus musculus OX=10090<br>GN=Gm14444 PE=4<br>SV=1;tr E9QAG4 E9QAG4_MO<br>USE RIKEN cDNA 4930522L14<br>gene OS=Mus musculus<br>OX=10090 G | 3 | 1 | 1 | 1 | 0 | 0 | 1 | 0 |
| 332 | REV_A2AV75                                                  | REV_A2AV75                                              | 1       | 1       | 1       |   |   | tr A2AV75 A2AV75_MOUSE<br>Bcl-2-modifying factor OS=Mus<br>musculus OX=10090 GN=Bmf<br>PE=4 SV=1                                                                                                                                                                                                    | 1 | 1 | 1 | 1 | 0 | 0 | 0 | 0 |
| 333 | REV_P52332;<br>REV_B1ASP2                                   | REV_P52332;RE<br>V_B1ASP2                               | 1;1     | 1;1     | 1;1     |   |   | sp P52332 JAK1_MOUSE<br>Tyrosine-protein kinase JAK1<br>OS=Mus musculus OX=10090<br>GN=Jak1 PE=1<br>SV=1;tr B1ASP2 B1ASP2_MOU<br>SE Tyrosine-protein kinase<br>OS=Mus musculus OX=10090<br>GN=Jak1 PE=1 SV=1                                                                                        | 2 | 1 | 1 | 1 | 0 | 1 | 0 | 0 |
| 334 | REV_D3YU59<br>;REV_D3Z58<br>9;REV_Q3UH<br>68;REV_D3Y<br>U22 | REV_D3YU59;R<br>EV_D3Z589;RE<br>V_Q3UH68;REV<br>_D3YU22 | 1;1;1;1 | 1;1;1;1 | 1;1;1;1 |   |   | tr D3YU59 D3YU59_MOUSE<br>LIM and calponin homology<br>domains-containing protein 1<br>(Fragment) OS=Mus musculus<br>OX=10090 GN=Limch1 PE=1<br>SV=2;tr D3Z589 D3Z589_MOU<br>SE LIM and calponin homology<br>domains-containing protein 1<br>OS=Mus musculus OX=10090<br>GN=Limch1 PE=1 SV=2        | 4 | 1 | 1 | 1 | 0 | 0 | 0 | 0 |
| 335 | REV_D3YX34<br>;REV_E9Q58<br>6;REV_E9Q3<br>M3;REV_O08<br>788 | REV_D3YX34;R<br>EV_E9Q586;RE<br>V_E9Q3M3;RE<br>V_O08788 | 1;1;1;1 | 1;1;1;1 | 1;1;1;1 |   |   | tr D3YX34 D3YX34_MOUSE<br>Dynactin subunit 1 OS=Mus<br>musculus OX=10090 GN=Dctn1<br>PE=1<br>SV=1;tr E9Q586 E9Q586_MO<br>USE Dynactin subunit 1<br>OS=Mus musculus OX=10090<br>GN=Dctn1 PE=1<br>SV=1;tr E9Q3M3 E9Q3M3_M<br>OUSE Dynactin subunit 1<br>OS=Mus musculus OX=10090<br>GN=Dctn1 PE=1 SV= | 4 | 1 | 1 | 1 | 1 | 0 | 0 | 0 |

|     | A                                    | B                                        | C     | D     | E     | F | G | H                                                                                                                                                                                                                                                                                                   | I | J | K | L | M | N | O | P |
|-----|--------------------------------------|------------------------------------------|-------|-------|-------|---|---|-----------------------------------------------------------------------------------------------------------------------------------------------------------------------------------------------------------------------------------------------------------------------------------------------------|---|---|---|---|---|---|---|---|
| 336 | REV_D3YXP6<br>;REV_Q9D1G2            | REV_D3YXP6;R<br>EV_Q9D1G2                | 1;1   | 1;1   | 1;1   |   |   | tr D3YXP6 D3YXP6_MOUSE<br>Phosphomevalonate kinase<br>OS=Mus musculus OX=10090<br>GN=Pmvk PE=1<br>SV=1;sp Q9D1G2 PMVK_MOU<br>SE Phosphomevalonate kinase<br>OS=Mus musculus OX=10090<br>GN=Pmvk PE=1 SV=3                                                                                           | 2 | 1 | 1 | 1 | 0 | 0 | 1 | 0 |
| 337 | REV_D3YZU5<br>;REV_D3YZU4;REV_D3YZU1 | REV_D3YZU5;R<br>EV_D3YZU4;RE<br>V_D3YZU1 | 1;1;1 | 1;1;1 | 1;1;1 |   |   | tr D3YZU5 D3YZU5_MOUSE<br>SH3 and multiple ankyrin<br>repeat domains protein 1<br>OS=Mus musculus OX=10090<br>GN=Shank1 PE=1<br>SV=1;tr D3YZU4 D3YZU4_MO<br>USE SH3 and multiple ankyrin<br>repeat domains protein 1<br>OS=Mus musculus OX=10090<br>GN=Shank1 PE=1<br>SV=1;sp D3YZU1 SHAN1_MO<br>US | 3 | 1 | 1 | 1 | 0 | 1 | 0 | 0 |
| 338 | REV_D3ZY9<br>;REV_Q9D417             | REV_D3ZY9;R<br>EV_Q9D417                 | 1;1   | 1;1   | 1;1   |   |   | tr D3ZY9 D3ZY9_MOUSE F-<br>box only protein 24 OS=Mus<br>musculus OX=10090<br>GN=Fbxo24 PE=4<br>SV=1;sp Q9D417 FBX24_MOU<br>SE F-box only protein 24<br>OS=Mus musculus OX=10090<br>GN=Fbxo24 PE=2 SV=1                                                                                             | 2 | 1 | 1 | 1 | 0 | 1 | 0 | 0 |
| 339 | REV_D3Z3W9;REV_F8VQ94                | REV_D3Z3W9;R<br>EV_F8VQ94                | 1;1   | 1;1   | 1;1   |   |   | tr D3Z3W9 D3Z3W9_MOUSE<br>Paired-Ig-like receptor A2<br>OS=Mus musculus OX=10090<br>GN=Pira2 PE=4<br>SV=1;tr F8VQ94 F8VQ94_MO<br>USE Paired-Ig-like receptor A2<br>OS=Mus musculus OX=10090<br>GN=Pira2 PE=4 SV=1                                                                                   | 2 | 1 | 1 | 1 | 1 | 0 | 0 | 0 |
| 340 | REV_D3Z5G2                           | REV_D3Z5G2                               | 1     | 1     | 1     |   |   | tr D3Z5G2 D3Z5G2_MOUSE<br>Solute carrier family 25<br>member 45 (Fragment)<br>OS=Mus musculus OX=10090<br>GN=Slc25a45 PE=1 SV=1                                                                                                                                                                     | 1 | 1 | 1 | 1 | 0 | 0 | 1 | 1 |
| 341 | REV_E9Q776<br>;REV_E9PY14;REV_E9Q3P4 | REV_E9Q776;R<br>EV_E9PY14;REV<br>_E9Q3P4 | 1;1;1 | 1;1;1 | 1;1;1 |   |   | tr E9Q776 E9Q776_MOUSE<br>Centromere protein F OS=Mus<br>musculus OX=10090 GN=Cenpf<br>PE=1<br>SV=1;tr E9PY14 E9PY14_MOU<br>SE Centromere protein F<br>(Fragment) OS=Mus musculus<br>OX=10090 GN=Cenpf PE=1<br>SV=1;tr E9Q3P4 E9Q3P4_MO<br>USE Centromere protein F<br>OS=Mus musculus OX=10090     | 3 | 1 | 1 | 1 | 0 | 0 | 0 | 0 |

|     | A                             | B                         | C   | D   | E   | F | G | H                                                                                                                                                                                                                                                              | I | J | K | L | M | N | O | P |
|-----|-------------------------------|---------------------------|-----|-----|-----|---|---|----------------------------------------------------------------------------------------------------------------------------------------------------------------------------------------------------------------------------------------------------------------|---|---|---|---|---|---|---|---|
| 342 | REV_E9Q2B0<br>;REV_Q8BM<br>Q2 | REV_E9Q2B0;R<br>EV_Q8BMQ2 | 1;1 | 1;1 | 1;1 |   |   | tr E9Q2B0 E9Q2B0_MOUSE<br>General transcription factor 3C<br>polypeptide 4 OS=Mus<br>musculus OX=10090<br>GN=Gtf3c4 PE=1<br>SV=1;sp Q8BMQ2 TF3C4_MO<br>USE General transcription<br>factor 3C polypeptide 4<br>OS=Mus musculus OX=10090<br>GN=Gtf3c4 PE=1 SV=2 | 2 | 1 | 1 | 1 | 0 | 1 | 0 | 0 |
| 343 | REV_Q8R4Y4<br>;REV_G3X97<br>3 | REV_Q8R4Y4;R<br>EV_G3X973 | 1;1 | 1;1 | 1;1 |   |   | sp Q8R4Y4 STAB1_MOUSE<br>Stabilin-1 OS=Mus musculus<br>OX=10090 GN=Stab1 PE=1<br>SV=1;tr G3X973 G3X973_MO<br>USE Stabilin 1, isoform CRA_a<br>OS=Mus musculus OX=10090<br>GN=Stab1 PE=1 SV=1                                                                   | 2 | 1 | 1 | 1 | 1 | 0 | 0 | 0 |
| 344 | REV_Q8BU6<br>1;REV_Q5SW<br>K7 | REV_Q8BU61;R<br>EV_Q5SWK7 | 1;1 | 1;1 | 1;1 |   |   | tr Q8BU61 Q8BU61_MOUSE<br>RING finger protein 145<br>OS=Mus musculus OX=10090<br>GN=Rnf145 PE=1<br>SV=1;sp Q5SWK7 RN145_MO<br>USE RING finger protein 145<br>OS=Mus musculus OX=10090<br>GN=Rnf145 PE=1 SV=1                                                   | 2 | 1 | 1 | 1 | 0 | 0 | 1 | 0 |
| 345 | REV_Q6UJY2                    | REV_Q6UJY2                |     | 1   | 1   | 1 |   | sp Q6UJY2 SL9C1_MOUSE<br>Sodium/hydrogen exchanger<br>10 OS=Mus musculus<br>OX=10090 GN=Slc9c1 PE=1<br>SV=3                                                                                                                                                    | 1 | 1 | 1 | 1 | 0 | 1 | 0 | 0 |
| 346 | REV_V9GXW<br>2;REV_Q8OV<br>31 | REV_V9GXW2;<br>REV_Q8OV31 | 1;1 | 1;1 | 1;1 |   |   | tr V9GXW2 V9GXW2_MOUSE<br>Centrosomal protein of 104<br>kDa (Fragment) OS=Mus<br>musculus OX=10090<br>GN=Cep104 PE=1<br>SV=1;sp Q8OV31 CE104_MO<br>SE Centrosomal protein of 104<br>kDa OS=Mus musculus<br>OX=10090 GN=Cep104 PE=1<br>SV=1                     | 2 | 1 | 1 | 1 | 0 | 0 | 0 | 0 |
| 347 | REV_Q925J9                    | REV_Q925J9                |     | 1   | 1   | 1 |   | sp Q925J9 MED1_MOUSE<br>Mediator of RNA polymerase II<br>transcription subunit 1<br>OS=Mus musculus OX=10090<br>GN=Med1 PE=1 SV=2                                                                                                                              | 1 | 1 | 1 | 1 | 0 | 0 | 0 | 1 |
| 348 | REV_Q9ZOM<br>1                | REV_Q9ZOM1                |     | 1   | 1   | 1 |   | sp Q9ZOM1 KLK4_MOUSE<br>Kallikrein-4 OS=Mus musculus<br>OX=10090 GN=Klk4 PE=1 SV=1                                                                                                                                                                             | 1 | 1 | 1 | 1 | 0 | 1 | 0 | 0 |

|     | A          | B          | C | D | E | F | G | H                                                                                                                                  | I | J | K | L | M | N | O | P |
|-----|------------|------------|---|---|---|---|---|------------------------------------------------------------------------------------------------------------------------------------|---|---|---|---|---|---|---|---|
| 349 | REV_Q9Z1B3 | REV_Q9Z1B3 | 1 | 1 | 1 |   |   | sp Q9Z1B3 PLCB1_MOUSE 1-phosphatidylinositol 4,5-bisphosphate phosphodiesterase beta-1 OS=Mus musculus OX=10090 GN=Plcb1 PE=1 SV=2 | 1 | 1 | 1 | 1 | 0 | 0 | 0 | 0 |

|   | Q                               | R                                       | S                                                     | T                                                            | U                                                    | V                                                            | W                                                    | X                                                            | Y                                                 | Z                                          | AA                                        | AB                                                | AC                                        | AD                                                | AE                          | AF                                               | AG                                    | AH                      | AI                 |
|---|---------------------------------|-----------------------------------------|-------------------------------------------------------|--------------------------------------------------------------|------------------------------------------------------|--------------------------------------------------------------|------------------------------------------------------|--------------------------------------------------------------|---------------------------------------------------|--------------------------------------------|-------------------------------------------|---------------------------------------------------|-------------------------------------------|---------------------------------------------------|-----------------------------|--------------------------------------------------|---------------------------------------|-------------------------|--------------------|
|   | Peptides<br>WT2 LPS<br>NLRP3 IP | Peptides<br>WT2 LPS-<br>ATP NLRP3<br>IP | Razor +<br>unique<br>peptides<br>WT Pooled<br>LPS IgG | Razor +<br>unique<br>peptides<br>WT Pooled<br>LPS_ATP<br>IgG | Razor +<br>unique<br>peptides<br>WT1 LPS<br>NLRP3 IP | Razor +<br>unique<br>peptides<br>WT1 LPS-<br>ATP NLRP3<br>IP | Razor +<br>unique<br>peptides<br>WT2 LPS<br>NLRP3 IP | Razor +<br>unique<br>peptides<br>WT2 LPS-<br>ATP NLRP3<br>IP | Unique<br>peptides<br>WT Pooled<br>LPS_ATP<br>IgG | Unique<br>peptides<br>WT Pooled<br>LPS_IgG | Unique<br>peptides<br>WT1 LPS<br>NLRP3 IP | Unique<br>peptides<br>WT1 LPS-<br>ATP NLRP3<br>IP | Unique<br>peptides<br>WT2 LPS<br>NLRP3 IP | Unique<br>peptides<br>WT2 LPS-<br>ATP NLRP3<br>IP | Sequence<br>coverage<br>[%] | Unique +<br>razor<br>sequence<br>coverage<br>[%] | Unique<br>sequence<br>coverage<br>[%] | Mol.<br>weight<br>[kDa] | Sequence<br>length |
| 1 |                                 |                                         |                                                       |                                                              |                                                      |                                                              |                                                      |                                                              |                                                   |                                            |                                           |                                                   |                                           |                                                   |                             |                                                  |                                       |                         |                    |
| 2 | 1                               | 1                                       | 0                                                     | 0                                                            | 1                                                    | 1                                                            | 1                                                    | 1                                                            | 0                                                 | 0                                          | 1                                         | 1                                                 | 1                                         | 1                                                 | 12.8                        | 12.8                                             | 12.8                                  | 13.232                  | 117                |
| 3 | 0                               | 0                                       | 2                                                     | 2                                                            | 0                                                    | 0                                                            | 0                                                    | 0                                                            | 2                                                 | 2                                          | 0                                         | 0                                                 | 0                                         | 0                                                 | 15                          | 15                                               | 15                                    | 10.976                  | 100                |
| 4 | 0                               | 0                                       | 1                                                     | 0                                                            | 0                                                    | 0                                                            | 0                                                    | 0                                                            | 1                                                 | 0                                          | 0                                         | 0                                                 | 0                                         | 0                                                 | 7.3                         | 7.3                                              | 7.3                                   | 13.821                  | 123                |
| 5 | 0                               | 0                                       | 1                                                     | 1                                                            | 0                                                    | 0                                                            | 0                                                    | 0                                                            | 1                                                 | 1                                          | 0                                         | 0                                                 | 0                                         | 0                                                 | 32.7                        | 5.2                                              | 5.2                                   | 35.633                  | 324                |

|   | Q | R | S | T | U | V | W | X | Y | Z | AA | AB | AC | AD | AE   | AF   | AG   | AH     | AI  |
|---|---|---|---|---|---|---|---|---|---|---|----|----|----|----|------|------|------|--------|-----|
| 6 | 0 | 0 | 0 | 0 | 1 | 0 | 0 | 0 | 0 | 0 | 1  | 0  | 0  | 0  | 1.2  | 1.2  | 1.2  | 101.17 | 899 |
| 7 | 0 | 0 | 0 | 0 | 0 | 1 | 0 | 0 | 0 | 0 | 0  | 1  | 0  | 0  | 9.6  | 9.6  | 9.6  | 20.162 | 178 |
| 8 | 4 | 2 | 0 | 1 | 2 | 2 | 4 | 2 | 0 | 1 | 2  | 2  | 4  | 2  | 17.9 | 17.9 | 17.9 | 29.939 | 280 |
| 9 | 0 | 0 | 1 | 0 | 0 | 0 | 0 | 0 | 1 | 0 | 0  | 0  | 0  | 0  | 27.4 | 27.4 | 27.4 | 8.4926 | 73  |

|    | Q | R | S | T | U | V | W | X | Y | Z | AA | AB | AC | AD | AE   | AF   | AG   | AH     | AI  |
|----|---|---|---|---|---|---|---|---|---|---|----|----|----|----|------|------|------|--------|-----|
| 10 | 1 | 3 | 0 | 0 | 2 | 1 | 1 | 3 | 0 | 0 | 2  | 1  | 1  | 3  | 49.4 | 49.4 | 49.4 | 8.7279 | 77  |
| 11 | 2 | 1 | 0 | 0 | 0 | 1 | 2 | 1 | 0 | 0 | 0  | 1  | 2  | 1  | 20   | 20   | 20   | 18.475 | 160 |
| 12 | 0 | 0 | 1 | 1 | 0 | 0 | 0 | 0 | 1 | 1 | 0  | 0  | 0  | 0  | 8.5  | 8.5  | 8.5  | 12.953 | 117 |

|    | Q | R | S | T | U | V | W | X | Y | Z | AA | AB | AC | AD | AE   | AF   | AG   | AH     | AI  |
|----|---|---|---|---|---|---|---|---|---|---|----|----|----|----|------|------|------|--------|-----|
| 13 | 7 | 6 | 0 | 1 | 8 | 7 | 7 | 6 | 0 | 1 | 8  | 7  | 7  | 6  | 38.5 | 38.5 | 38.5 | 36.407 | 335 |
| 14 | 0 | 0 | 0 | 0 | 1 | 0 | 0 | 0 | 0 | 0 | 1  | 0  | 0  | 0  | 5.9  | 5.9  | 5.9  | 26.568 | 239 |
| 15 | 0 | 0 | 0 | 0 | 1 | 0 | 0 | 0 | 0 | 0 | 1  | 0  | 0  | 0  | 22.6 | 22.6 | 22.6 | 6.107  | 53  |



|    | Q | R | S | T | U | V | W | X | Y | Z | AA | AB | AC | AD | AE   | AF   | AG   | AH     | AI  |
|----|---|---|---|---|---|---|---|---|---|---|----|----|----|----|------|------|------|--------|-----|
| 16 | 0 | 0 | 0 | 0 | 1 | 0 | 0 | 0 | 0 | 0 | 1  | 0  | 0  | 0  | 8.8  | 8.8  | 8.8  | 20.859 | 181 |
| 17 | 0 | 0 | 0 | 0 | 0 | 1 | 0 | 0 | 0 | 0 | 0  | 1  | 0  | 0  | 19.1 | 19.1 | 19.1 | 9.8176 | 89  |
| 18 | 0 | 0 | 1 | 0 | 1 | 0 | 0 | 0 | 1 | 0 | 1  | 0  | 0  | 0  | 1.6  | 1.6  | 1.6  | 91.536 | 795 |
| 19 | 2 | 1 | 0 | 0 | 4 | 1 | 2 | 1 | 0 | 0 | 4  | 1  | 2  | 1  | 12.1 | 12.1 | 12.1 | 51.349 | 471 |

|    | Q | R | S | T | U | V | W | X | Y | Z | AA | AB | AC | AD | AE   | AF   | AG   | AH     | AI   |
|----|---|---|---|---|---|---|---|---|---|---|----|----|----|----|------|------|------|--------|------|
| 20 | 0 | 0 | 1 | 0 | 0 | 0 | 0 | 0 | 1 | 0 | 0  | 0  | 0  | 0  | 5    | 5    | 5    | 47.81  | 422  |
| 21 | 0 | 0 | 0 | 0 | 1 | 0 | 0 | 0 | 0 | 0 | 1  | 0  | 0  | 0  | 6.2  | 6.2  | 6.2  | 31.367 | 273  |
| 22 | 1 | 0 | 0 | 0 | 0 | 0 | 1 | 0 | 0 | 0 | 0  | 0  | 1  | 0  | 1    | 1    | 1    | 162.11 | 1437 |
| 23 | 0 | 2 | 2 | 2 | 2 | 2 | 0 | 2 | 2 | 2 | 2  | 2  | 0  | 2  | 22.2 | 22.2 | 22.2 | 13.66  | 126  |
| 24 | 0 | 0 | 0 | 1 | 0 | 0 | 0 | 0 | 0 | 1 | 0  | 0  | 0  | 0  | 9.5  | 9.5  | 9.5  | 10.956 | 95   |

|    | Q | R | S | T | U | V | W | X | Y | Z | AA | AB | AC | AD | AE  | AF  | AG  | AH     | AI   |
|----|---|---|---|---|---|---|---|---|---|---|----|----|----|----|-----|-----|-----|--------|------|
| 25 | 0 | 0 | 0 | 0 | 0 | 1 | 0 | 0 | 0 | 0 | 0  | 1  | 0  | 0  | 1.5 | 1.5 | 1.5 | 134.44 | 1220 |
| 26 | 0 | 0 | 0 | 1 | 0 | 1 | 0 | 0 | 0 | 1 | 0  | 1  | 0  | 0  | 1.1 | 1.1 | 1.1 | 144.12 | 1263 |
| 27 | 0 | 1 | 0 | 0 | 0 | 0 | 0 | 1 | 0 | 0 | 0  | 0  | 0  | 1  | 1.8 | 1.8 | 1.8 | 80.996 | 707  |
| 28 | 1 | 0 | 1 | 1 | 0 | 1 | 1 | 0 | 1 | 1 | 0  | 1  | 1  | 0  | 2.7 | 2.7 | 2.7 | 35.927 | 335  |
| 29 | 1 | 0 | 0 | 0 | 0 | 0 | 1 | 0 | 0 | 0 | 0  | 0  | 1  | 0  | 9.3 | 9.3 | 9.3 | 14.182 | 129  |

|    | Q | R | S | T | U | V | W | X | Y | Z | AA | AB | AC | AD | AE   | AF   | AG   | AH     | AI   |
|----|---|---|---|---|---|---|---|---|---|---|----|----|----|----|------|------|------|--------|------|
| 30 | 0 | 0 | 0 | 1 | 0 | 0 | 0 | 0 | 0 | 1 | 0  | 0  | 0  | 0  | 0.8  | 0.8  | 0.8  | 172.34 | 1562 |
| 31 | 1 | 0 | 0 | 1 | 0 | 0 | 1 | 0 | 0 | 1 | 0  | 0  | 1  | 0  | 34.5 | 34.5 | 34.5 | 5.5847 | 55   |
| 32 | 0 | 0 | 0 | 1 | 0 | 1 | 0 | 0 | 0 | 1 | 0  | 1  | 0  | 0  | 11.3 | 11.3 | 11.3 | 16.697 | 150  |
| 33 | 0 | 0 | 0 | 1 | 0 | 0 | 0 | 0 | 0 | 1 | 0  | 0  | 0  | 0  | 2.7  | 2.7  | 2.7  | 54.178 | 479  |

|    | Q | R | S | T | U | V | W | X | Y | Z | AA | AB | AC | AD | AE   | AF   | AG   | AH     | AI   |
|----|---|---|---|---|---|---|---|---|---|---|----|----|----|----|------|------|------|--------|------|
| 34 | 0 | 0 | 1 | 1 | 0 | 0 | 0 | 0 | 1 | 1 | 0  | 0  | 0  | 0  | 1.5  | 1.5  | 1.5  | 121.64 | 1061 |
| 35 | 0 | 0 | 1 | 0 | 0 | 0 | 0 | 0 | 1 | 0 | 0  | 0  | 0  | 0  | 1.3  | 1.3  | 1.3  | 98.453 | 861  |
| 36 | 0 | 0 | 1 | 0 | 0 | 0 | 0 | 0 | 1 | 0 | 0  | 0  | 0  | 0  | 2.2  | 2.2  | 2.2  | 71.168 | 641  |
| 37 | 0 | 0 | 0 | 0 | 0 | 1 | 0 | 0 | 0 | 0 | 0  | 1  | 0  | 0  | 2    | 2    | 2    | 87.56  | 802  |
| 38 | 0 | 0 | 0 | 1 | 2 | 1 | 0 | 0 | 0 | 1 | 2  | 1  | 0  | 0  | 14.8 | 14.8 | 14.8 | 19.438 | 176  |

|    | Q | R | S | T | U | V | W | X | Y | Z | AA | AB | AC | AD | AE   | AF   | AG   | AH     | AI   |
|----|---|---|---|---|---|---|---|---|---|---|----|----|----|----|------|------|------|--------|------|
| 39 | 0 | 1 | 0 | 0 | 0 | 0 | 0 | 1 | 0 | 0 | 0  | 0  | 0  | 1  | 15   | 15   | 15   | 13.094 | 120  |
| 40 | 0 | 0 | 0 | 1 | 0 | 0 | 0 | 0 | 0 | 1 | 0  | 0  | 0  | 0  | 34.5 | 34.5 | 34.5 | 6.4913 | 58   |
| 41 | 0 | 0 | 0 | 1 | 0 | 0 | 0 | 0 | 0 | 1 | 0  | 0  | 0  | 0  | 2    | 2    | 2    | 84.904 | 734  |
| 42 | 0 | 0 | 0 | 0 | 1 | 0 | 0 | 0 | 0 | 0 | 1  | 0  | 0  | 0  | 1.3  | 1.3  | 1.3  | 154.66 | 1434 |
| 43 | 0 | 1 | 0 | 1 | 0 | 1 | 0 | 1 | 0 | 1 | 0  | 1  | 0  | 1  | 1.1  | 1.1  | 1.1  | 151.29 | 1323 |

|    | Q | R | S | T | U | V | W | X | Y | Z | AA | AB | AC | AD | AE   | AF   | AG   | AH     | AI   |
|----|---|---|---|---|---|---|---|---|---|---|----|----|----|----|------|------|------|--------|------|
| 44 | 0 | 0 | 0 | 0 | 1 | 0 | 0 | 0 | 0 | 0 | 1  | 0  | 0  | 0  | 0.4  | 0.4  | 0.4  | 412.58 | 3720 |
| 45 | 0 | 0 | 1 | 0 | 0 | 0 | 0 | 0 | 1 | 0 | 0  | 0  | 0  | 0  | 16.2 | 16.2 | 16.2 | 8.6919 | 74   |
| 46 | 0 | 0 | 0 | 0 | 1 | 0 | 0 | 0 | 0 | 0 | 1  | 0  | 0  | 0  | 3.1  | 3.1  | 3.1  | 45.428 | 387  |
| 47 | 1 | 0 | 0 | 0 | 0 | 1 | 1 | 0 | 0 | 0 | 0  | 1  | 1  | 0  | 0.2  | 0.2  | 0.2  | 1009.9 | 8799 |
| 48 | 1 | 0 | 0 | 0 | 0 | 1 | 1 | 0 | 0 | 0 | 0  | 1  | 1  | 0  | 2.5  | 2.5  | 2.5  | 117.95 | 1031 |
| 49 | 0 | 0 | 0 | 0 | 1 | 0 | 0 | 0 | 0 | 0 | 1  | 0  | 0  | 0  | 7.1  | 7.1  | 7.1  | 26.889 | 240  |

|    | Q | R | S | T | U | V | W | X | Y | Z | AA | AB | AC | AD | AE   | AF   | AG   | AH     | AI   |
|----|---|---|---|---|---|---|---|---|---|---|----|----|----|----|------|------|------|--------|------|
| 50 | 0 | 0 | 0 | 0 | 0 | 1 | 0 | 0 | 0 | 0 | 0  | 1  | 0  | 0  | 8.9  | 8.9  | 8.9  | 20.633 | 179  |
| 51 | 1 | 0 | 0 | 0 | 0 | 0 | 1 | 0 | 0 | 0 | 0  | 0  | 1  | 0  | 1.3  | 1.3  | 1.3  | 121.54 | 1090 |
| 52 | 1 | 0 | 0 | 0 | 2 | 1 | 1 | 0 | 0 | 0 | 2  | 1  | 1  | 0  | 12.6 | 12.6 | 12.6 | 25.459 | 230  |
| 53 | 0 | 1 | 0 | 0 | 0 | 0 | 0 | 1 | 0 | 0 | 0  | 0  | 0  | 1  | 0.8  | 0.8  | 0.8  | 223.35 | 1938 |
| 54 | 0 | 0 | 1 | 0 | 0 | 0 | 0 | 0 | 1 | 0 | 0  | 0  | 0  | 0  | 1.4  | 1.4  | 1.4  | 151.03 | 1392 |



|    | Q | R | S | T | U | V | W | X | Y | Z | AA | AB | AC | AD | AE   | AF   | AG   | AH     | AI  |
|----|---|---|---|---|---|---|---|---|---|---|----|----|----|----|------|------|------|--------|-----|
| 55 | 0 | 0 | 0 | 1 | 0 | 0 | 0 | 0 | 0 | 1 | 0  | 0  | 0  | 0  | 7.8  | 7.8  | 7.8  | 23.025 | 204 |
| 56 | 0 | 0 | 0 | 1 | 0 | 0 | 0 | 0 | 0 | 1 | 0  | 0  | 0  | 0  | 6.1  | 6.1  | 6.1  | 18.783 | 163 |
| 57 | 0 | 0 | 0 | 0 | 1 | 0 | 0 | 0 | 0 | 0 | 1  | 0  | 0  | 0  | 39.1 | 39.1 | 39.1 | 5.0945 | 46  |
| 58 | 0 | 0 | 0 | 1 | 0 | 0 | 0 | 0 | 0 | 1 | 0  | 0  | 0  | 0  | 2.3  | 2.3  | 2.3  | 85.661 | 754 |

|    | Q | R | S | T | U | V | W | X | Y | Z | AA | AB | AC | AD | AE  | AF  | AG  | AH     | AI   |
|----|---|---|---|---|---|---|---|---|---|---|----|----|----|----|-----|-----|-----|--------|------|
| 59 | 0 | 0 | 1 | 0 | 0 | 0 | 0 | 0 | 1 | 0 | 0  | 0  | 0  | 0  | 3.6 | 3.6 | 3.6 | 28.146 | 248  |
| 60 | 0 | 0 | 1 | 0 | 0 | 0 | 0 | 0 | 1 | 0 | 0  | 0  | 0  | 0  | 2.8 | 2.8 | 2.8 | 78.39  | 713  |
| 61 | 0 | 1 | 0 | 0 | 0 | 0 | 0 | 1 | 0 | 0 | 0  | 0  | 0  | 1  | 0.3 | 0.3 | 0.3 | 509.03 | 4453 |
| 62 | 0 | 1 | 0 | 0 | 1 | 0 | 0 | 1 | 0 | 0 | 1  | 0  | 0  | 1  | 4.1 | 4.1 | 4.1 | 51.926 | 438  |
| 63 | 1 | 0 | 0 | 0 | 0 | 1 | 1 | 0 | 0 | 0 | 0  | 1  | 1  | 0  | 5.7 | 5.7 | 5.7 | 67.501 | 615  |

|    | Q | R | S | T | U | V | W | X | Y | Z | AA | AB | AC | AD | AE   | AF   | AG   | AH     | AI    |
|----|---|---|---|---|---|---|---|---|---|---|----|----|----|----|------|------|------|--------|-------|
| 64 | 0 | 0 | 1 | 0 | 0 | 0 | 0 | 0 | 1 | 0 | 0  | 0  | 0  | 0  | 5    | 5    | 5    | 59.474 | 560   |
| 65 | 0 | 1 | 0 | 0 | 0 | 0 | 0 | 1 | 0 | 0 | 0  | 0  | 0  | 1  | 11.9 | 11.9 | 11.9 | 16.243 | 151   |
| 66 | 0 | 0 | 0 | 0 | 1 | 0 | 0 | 0 | 0 | 0 | 1  | 0  | 0  | 0  | 2.3  | 2.3  | 2.3  | 63.383 | 565   |
| 67 | 0 | 0 | 0 | 0 | 1 | 0 | 0 | 0 | 0 | 0 | 1  | 0  | 0  | 0  | 1.8  | 1.8  | 1.8  | 75.127 | 658   |
| 68 | 0 | 0 | 1 | 0 | 1 | 0 | 0 | 0 | 1 | 0 | 1  | 0  | 0  | 0  | 0.1  | 0.1  | 0.1  | 3716   | 33467 |

|    | Q | R | S | T | U | V | W | X | Y | Z | AA | AB | AC | AD | AE   | AF   | AG   | AH     | AI  |
|----|---|---|---|---|---|---|---|---|---|---|----|----|----|----|------|------|------|--------|-----|
| 69 | 1 | 1 | 0 | 0 | 0 | 1 | 1 | 1 | 0 | 0 | 0  | 1  | 1  | 1  | 2.3  | 2.3  | 2.3  | 56.008 | 483 |
| 70 | 0 | 0 | 1 | 1 | 0 | 0 | 0 | 0 | 1 | 1 | 0  | 0  | 0  | 0  | 5.5  | 5.5  | 5.5  | 32.238 | 291 |
| 71 | 1 | 0 | 1 | 1 | 1 | 1 | 1 | 0 | 1 | 1 | 1  | 1  | 1  | 0  | 1.9  | 1.9  | 1.9  | 50.346 | 462 |
| 72 | 1 | 1 | 0 | 0 | 4 | 0 | 1 | 1 | 0 | 0 | 4  | 0  | 1  | 1  | 16.5 | 16.5 | 16.5 | 45.12  | 418 |
| 73 | 0 | 0 | 0 | 0 | 1 | 0 | 0 | 0 | 0 | 0 | 1  | 0  | 0  | 0  | 4    | 4    | 4    | 37.009 | 325 |
| 74 | 1 | 0 | 0 | 0 | 0 | 0 | 1 | 0 | 0 | 0 | 0  | 0  | 1  | 0  | 9.7  | 9.7  | 9.7  | 11.083 | 103 |

|    | Q | R | S | T | U | V | W | X | Y | Z | AA | AB | AC | AD | AE   | AF   | AG   | AH     | AI   |
|----|---|---|---|---|---|---|---|---|---|---|----|----|----|----|------|------|------|--------|------|
| 75 | 0 | 0 | 0 | 1 | 0 | 0 | 0 | 0 | 0 | 1 | 0  | 0  | 0  | 0  | 13.2 | 13.2 | 13.2 | 7.559  | 68   |
| 76 | 0 | 0 | 1 | 0 | 0 | 0 | 0 | 0 | 1 | 0 | 0  | 0  | 0  | 0  | 13.5 | 13.5 | 13.5 | 18.078 | 155  |
| 77 | 0 | 0 | 1 | 0 | 0 | 0 | 0 | 0 | 1 | 0 | 0  | 0  | 0  | 0  | 12.4 | 12.4 | 12.4 | 12.509 | 121  |
| 78 | 0 | 1 | 0 | 0 | 0 | 0 | 0 | 1 | 0 | 0 | 0  | 0  | 0  | 1  | 3.8  | 3.8  | 3.8  | 58.051 | 523  |
| 79 | 1 | 0 | 0 | 0 | 1 | 0 | 1 | 0 | 0 | 0 | 1  | 0  | 1  | 0  | 4.8  | 4.8  | 4.8  | 26.391 | 229  |
| 80 | 1 | 0 | 0 | 0 | 0 | 0 | 1 | 0 | 0 | 0 | 0  | 0  | 1  | 0  | 1.2  | 1.2  | 1.2  | 95.042 | 827  |
| 81 | 0 | 1 | 0 | 0 | 0 | 0 | 0 | 1 | 0 | 0 | 0  | 0  | 0  | 1  | 1.2  | 1.2  | 1.2  | 128.39 | 1133 |

|    | Q | R | S | T | U | V | W | X | Y | Z | AA | AB | AC | AD | AE   | AF   | AG   | AH     | AI   |
|----|---|---|---|---|---|---|---|---|---|---|----|----|----|----|------|------|------|--------|------|
| 82 | 1 | 1 | 0 | 1 | 1 | 0 | 1 | 1 | 0 | 1 | 1  | 0  | 1  | 1  | 10   | 10   | 10   | 30.198 | 280  |
| 83 | 0 | 0 | 0 | 0 | 1 | 0 | 0 | 0 | 0 | 0 | 1  | 0  | 0  | 0  | 13.9 | 13.9 | 13.9 | 14.265 | 137  |
| 84 | 0 | 1 | 0 | 0 | 0 | 0 | 0 | 1 | 0 | 0 | 0  | 0  | 0  | 1  | 7.6  | 7.6  | 7.6  | 19.703 | 172  |
| 85 | 0 | 0 | 1 | 0 | 0 | 0 | 0 | 0 | 1 | 0 | 0  | 0  | 0  | 0  | 1.9  | 1.9  | 1.9  | 47.825 | 424  |
| 86 | 0 | 1 | 0 | 0 | 0 | 0 | 0 | 1 | 0 | 0 | 0  | 0  | 0  | 1  | 15.3 | 15.3 | 15.3 | 14.629 | 137  |
| 87 | 0 | 0 | 0 | 0 | 0 | 1 | 0 | 0 | 0 | 0 | 0  | 1  | 0  | 0  | 13.3 | 13.3 | 13.3 | 11.756 | 113  |
| 88 | 0 | 0 | 1 | 0 | 0 | 0 | 0 | 0 | 1 | 0 | 0  | 0  | 0  | 0  | 0.8  | 0.8  | 0.8  | 164.34 | 1477 |
| 89 | 5 | 2 | 1 | 3 | 4 | 5 | 5 | 2 | 1 | 3 | 4  | 5  | 5  | 2  | 19.2 | 19.2 | 19.2 | 43.9   | 401  |
| 90 | 1 | 3 | 0 | 0 | 0 | 1 | 0 | 0 | 0 | 0 | 0  | 0  | 0  | 0  | 10.5 | 2.1  | 0    | 45.771 | 420  |

|    | Q | R  | S | T  | U | V | W | X  | Y | Z | AA | AB | AC | AD | AE   | AF   | AG   | AH     | AI  |
|----|---|----|---|----|---|---|---|----|---|---|----|----|----|----|------|------|------|--------|-----|
| 91 | 0 | 0  | 0 | 0  | 0 | 1 | 0 | 0  | 0 | 0 | 0  | 1  | 0  | 0  | 4.3  | 2.9  | 2.9  | 53.5   | 486 |
| 92 | 1 | 4  | 0 | 3  | 0 | 4 | 1 | 4  | 0 | 3 | 0  | 4  | 1  | 4  | 39.8 | 39.8 | 39.8 | 14.186 | 123 |
| 93 | 8 | 6  | 7 | 8  | 7 | 6 | 8 | 6  | 7 | 8 | 7  | 6  | 8  | 6  | 60.6 | 60.6 | 60.6 | 24.409 | 231 |
| 94 | 5 | 12 | 3 | 15 | 2 | 4 | 4 | 11 | 0 | 2 | 0  | 0  | 1  | 3  | 50.2 | 48.3 | 14   | 51.621 | 472 |

|    | Q | R  | S | T | U | V | W | X | Y | Z | AA | AB | AC | AD | AE   | AF   | AG   | AH     | AI  |
|----|---|----|---|---|---|---|---|---|---|---|----|----|----|----|------|------|------|--------|-----|
| 95 | 9 | 15 | 3 | 9 | 3 | 5 | 4 | 9 | 0 | 1 | 0  | 0  | 0  | 2  | 32.1 | 23   | 4.8  | 60.044 | 564 |
| 96 | 0 | 0  | 0 | 0 | 1 | 0 | 0 | 0 | 0 | 0 | 1  | 0  | 0  | 0  | 12.5 | 12.5 | 12.5 | 11.82  | 112 |
| 97 | 5 | 6  | 3 | 4 | 3 | 5 | 5 | 6 | 3 | 4 | 3  | 5  | 5  | 6  | 35.7 | 35.7 | 35.7 | 22.975 | 199 |
| 98 | 2 | 5  | 1 | 6 | 2 | 3 | 2 | 5 | 1 | 6 | 2  | 3  | 2  | 5  | 32.9 | 32.9 | 32.9 | 24.348 | 207 |



|     | Q | R | S | T | U | V | W | X | Y | Z | AA | AB | AC | AD | AE   | AF   | AG   | AH     | AI  |
|-----|---|---|---|---|---|---|---|---|---|---|----|----|----|----|------|------|------|--------|-----|
| 99  | 1 | 1 | 1 | 1 | 1 | 1 | 1 | 1 | 1 | 1 | 1  | 1  | 1  | 1  | 9.1  | 9.1  | 9.1  | 23.583 | 209 |
| 100 | 4 | 6 | 0 | 4 | 2 | 4 | 4 | 6 | 0 | 4 | 2  | 4  | 4  | 6  | 40.2 | 40.2 | 40.2 | 18.974 | 169 |
| 101 | 4 | 7 | 3 | 8 | 2 | 8 | 4 | 7 | 3 | 8 | 2  | 8  | 4  | 7  | 62.3 | 62.3 | 62.3 | 18.281 | 162 |

|     | Q  | R  | S  | T  | U  | V  | W  | X  | Y  | Z  | AA | AB | AC | AD | AE   | AF   | AG   | AH     | AI  |
|-----|----|----|----|----|----|----|----|----|----|----|----|----|----|----|------|------|------|--------|-----|
| 102 | 39 | 36 | 34 | 35 | 42 | 35 | 39 | 36 | 34 | 35 | 42 | 35 | 39 | 36 | 72.8 | 72.8 | 72.8 | 69.293 | 607 |
| 103 | 9  | 14 | 0  | 0  | 0  | 0  | 0  | 1  | 0  | 0  | 0  | 0  | 0  | 1  | 30.3 | 3    | 3    | 59.998 | 564 |

|     | Q  | R  | S  | T  | U  | V  | W  | X  | Y  | Z  | AA | AB | AC | AD | AE   | AF   | AG   | AH     | AI  |
|-----|----|----|----|----|----|----|----|----|----|----|----|----|----|----|------|------|------|--------|-----|
| 104 | 17 | 23 | 16 | 20 | 13 | 18 | 15 | 21 | 12 | 14 | 9  | 13 | 11 | 16 | 43.2 | 40.1 | 30.3 | 66.017 | 644 |
| 105 | 0  | 1  | 0  | 0  | 1  | 0  | 0  | 1  | 0  | 0  | 1  | 0  | 0  | 1  | 8.1  | 8.1  | 8.1  | 26.558 | 247 |
| 106 | 5  | 10 | 4  | 8  | 0  | 0  | 1  | 4  | 4  | 8  | 0  | 0  | 1  | 4  | 49.5 | 35.3 | 35.3 | 51.267 | 473 |

|     | Q  | R  | S  | T  | U  | V  | W  | X  | Y  | Z  | AA | AB | AC | AD | AE   | AF   | AG   | AH     | AI  |
|-----|----|----|----|----|----|----|----|----|----|----|----|----|----|----|------|------|------|--------|-----|
| 107 | 21 | 24 | 20 | 24 | 21 | 23 | 21 | 24 | 19 | 23 | 20 | 21 | 20 | 22 | 52.6 | 52.6 | 49.2 | 59.51  | 593 |
| 108 | 7  | 14 | 4  | 6  | 2  | 1  | 2  | 7  | 3  | 3  | 1  | 1  | 1  | 4  | 31.4 | 17.5 | 9.3  | 62.378 | 590 |
| 109 | 1  | 1  | 0  | 0  | 0  | 1  | 0  | 0  | 0  | 0  | 0  | 1  | 0  | 0  | 3.9  | 2.4  | 2.4  | 63.91  | 594 |
| 110 | 0  | 0  | 0  | 0  | 1  | 0  | 0  | 0  | 0  | 0  | 1  | 0  | 0  | 0  | 4.1  | 4.1  | 4.1  | 46.103 | 416 |

|     | Q  | R  | S  | T  | U  | V  | W  | X  | Y  | Z  | AA | AB | AC | AD | AE | AF | AG | AH     | AI  |
|-----|----|----|----|----|----|----|----|----|----|----|----|----|----|----|----|----|----|--------|-----|
| 111 | 13 | 17 | 17 | 20 | 14 | 15 | 13 | 17 | 17 | 20 | 14 | 15 | 13 | 17 | 52 | 52 | 52 | 62.129 | 623 |

|     | Q  | R  | S  | T  | U  | V  | W  | X  | Y  | Z  | AA | AB | AC | AD | AE   | AF   | AG   | AH     | AI   |
|-----|----|----|----|----|----|----|----|----|----|----|----|----|----|----|------|------|------|--------|------|
| 112 | 18 | 22 | 19 | 25 | 17 | 27 | 18 | 22 | 11 | 17 | 10 | 17 | 10 | 14 | 59.5 | 59.5 | 45.1 | 65.865 | 645  |
| 113 | 3  | 4  | 0  | 4  | 0  | 0  | 0  | 0  | 0  | 4  | 0  | 0  | 0  | 0  | 16.1 | 9.1  | 9.1  | 65.87  | 638  |
| 114 | 2  | 4  | 0  | 2  | 0  | 0  | 0  | 0  | 0  | 2  | 0  | 0  | 0  | 0  | 24.5 | 7.4  | 7.4  | 48.105 | 432  |
| 115 | 3  | 2  | 2  | 1  | 3  | 2  | 3  | 2  | 2  | 1  | 3  | 2  | 3  | 2  | 23.5 | 23.5 | 23.5 | 24.536 | 234  |
| 116 | 0  | 1  | 0  | 0  | 0  | 0  | 0  | 1  | 0  | 0  | 0  | 0  | 0  | 1  | 3.4  | 3.4  | 3.4  | 43.017 | 380  |
| 117 | 0  | 1  | 0  | 0  | 0  | 0  | 0  | 1  | 0  | 0  | 0  | 0  | 0  | 1  | 1.4  | 1.4  | 1.4  | 85.411 | 760  |
| 118 | 0  | 1  | 0  | 1  | 0  | 1  | 0  | 1  | 0  | 1  | 0  | 1  | 0  | 1  | 0.5  | 0.5  | 0.5  | 248.07 | 2391 |
| 119 | 2  | 2  | 0  | 1  | 1  | 0  | 1  | 1  | 0  | 1  | 1  | 0  | 1  | 1  | 3.8  | 1.7  | 1.7  | 61.802 | 578  |
| 120 | 0  | 2  | 0  | 1  | 0  | 0  | 0  | 2  | 0  | 1  | 0  | 0  | 0  | 2  | 4.5  | 4.5  | 4.5  | 282.39 | 2850 |

|     | Q | R | S | T | U | V | W | X | Y | Z | AA | AB | AC | AD | AE  | AF  | AG  | AH     | AI  |
|-----|---|---|---|---|---|---|---|---|---|---|----|----|----|----|-----|-----|-----|--------|-----|
| 121 | 0 | 0 | 1 | 0 | 0 | 0 | 0 | 0 | 1 | 0 | 0  | 0  | 0  | 0  | 2   | 2   | 2   | 58.859 | 508 |
| 122 | 0 | 0 | 0 | 1 | 0 | 0 | 0 | 0 | 0 | 1 | 0  | 0  | 0  | 0  | 4.1 | 4.1 | 4.1 | 38.125 | 344 |
| 123 | 1 | 0 | 0 | 0 | 0 | 0 | 1 | 0 | 0 | 0 | 0  | 0  | 1  | 0  | 2.4 | 2.4 | 2.4 | 50.838 | 457 |
| 124 | 0 | 1 | 0 | 0 | 0 | 0 | 0 | 1 | 0 | 0 | 0  | 0  | 0  | 1  | 3   | 3   | 3   | 46.451 | 402 |
| 125 | 0 | 0 | 1 | 0 | 0 | 0 | 0 | 0 | 1 | 0 | 0  | 0  | 0  | 0  | 7.5 | 7.5 | 7.5 | 20.389 | 187 |
| 126 | 0 | 0 | 1 | 0 | 0 | 0 | 0 | 0 | 1 | 0 | 0  | 0  | 0  | 0  | 1   | 1   | 1   | 95.493 | 819 |

|     | Q | R | S | T | U | V | W | X | Y | Z | AA | AB | AC | AD | AE   | AF   | AG   | AH     | AI   |
|-----|---|---|---|---|---|---|---|---|---|---|----|----|----|----|------|------|------|--------|------|
| 127 | 0 | 1 | 0 | 0 | 0 | 0 | 0 | 1 | 0 | 0 | 0  | 0  | 0  | 1  | 1.3  | 1.3  | 1.3  | 125.06 | 1117 |
| 128 | 0 | 0 | 1 | 0 | 0 | 0 | 0 | 0 | 1 | 0 | 0  | 0  | 0  | 0  | 1.8  | 1.8  | 1.8  | 122.19 | 1094 |
| 129 | 1 | 2 | 0 | 0 | 1 | 3 | 1 | 2 | 0 | 0 | 1  | 3  | 1  | 2  | 17.5 | 17.5 | 17.5 | 54.594 | 503  |
| 130 | 0 | 0 | 1 | 0 | 0 | 0 | 0 | 0 | 1 | 0 | 0  | 0  | 0  | 0  | 7.9  | 7.9  | 7.9  | 20.095 | 178  |
| 131 | 0 | 0 | 0 | 1 | 0 | 0 | 0 | 0 | 0 | 1 | 0  | 0  | 0  | 0  | 14.2 | 14.2 | 14.2 | 15.962 | 148  |
| 132 | 0 | 0 | 0 | 0 | 1 | 0 | 0 | 0 | 0 | 0 | 1  | 0  | 0  | 0  | 15.7 | 15.7 | 15.7 | 14.78  | 134  |



|     | Q | R | S | T | U | V | W | X | Y | Z | AA | AB | AC | AD | AE  | AF  | AG  | AH     | AI   |
|-----|---|---|---|---|---|---|---|---|---|---|----|----|----|----|-----|-----|-----|--------|------|
| 133 | 0 | 0 | 0 | 0 | 0 | 1 | 0 | 0 | 0 | 0 | 0  | 1  | 0  | 0  | 6.6 | 6.6 | 6.6 | 24.002 | 211  |
| 134 | 0 | 0 | 0 | 1 | 0 | 0 | 0 | 0 | 0 | 1 | 0  | 0  | 0  | 0  | 2.3 | 2.3 | 2.3 | 74.097 | 698  |
| 135 | 1 | 0 | 0 | 1 | 0 | 0 | 1 | 0 | 0 | 1 | 0  | 0  | 1  | 0  | 2.2 | 2.2 | 2.2 | 75.952 | 651  |
| 136 | 1 | 0 | 0 | 0 | 0 | 0 | 1 | 0 | 0 | 0 | 0  | 0  | 1  | 0  | 4.2 | 4.2 | 4.2 | 47.219 | 403  |
| 137 | 0 | 0 | 0 | 1 | 0 | 0 | 0 | 0 | 0 | 1 | 0  | 0  | 0  | 0  | 4.9 | 4.9 | 4.9 | 31.985 | 284  |
| 138 | 0 | 0 | 0 | 1 | 0 | 0 | 0 | 0 | 0 | 1 | 0  | 0  | 0  | 0  | 0.9 | 0.9 | 0.9 | 196.02 | 1733 |

|     | Q | R | S | T | U | V | W | X | Y | Z | AA | AB | AC | AD | AE   | AF   | AG   | AH     | AI  |
|-----|---|---|---|---|---|---|---|---|---|---|----|----|----|----|------|------|------|--------|-----|
| 139 | 0 | 0 | 0 | 0 | 1 | 0 | 0 | 0 | 0 | 0 | 1  | 0  | 0  | 0  | 2.1  | 2.1  | 2.1  | 93.868 | 806 |
| 140 | 0 | 0 | 0 | 0 | 1 | 0 | 0 | 0 | 0 | 0 | 1  | 0  | 0  | 0  | 2.6  | 2.6  | 2.6  | 67.245 | 582 |
| 141 | 1 | 1 | 0 | 0 | 1 | 1 | 1 | 1 | 0 | 0 | 1  | 1  | 1  | 1  | 19.2 | 19.2 | 19.2 | 12.821 | 120 |
| 142 | 0 | 0 | 0 | 1 | 0 | 0 | 0 | 0 | 0 | 1 | 0  | 0  | 0  | 0  | 1.1  | 1.1  | 1.1  | 97.587 | 857 |
| 143 | 0 | 1 | 0 | 0 | 1 | 0 | 0 | 1 | 0 | 0 | 1  | 0  | 0  | 1  | 0.9  | 0.9  | 0.9  | 112.17 | 986 |

|     | Q | R | S | T | U | V | W | X | Y | Z | AA | AB | AC | AD | AE  | AF  | AG  | AH     | AI   |
|-----|---|---|---|---|---|---|---|---|---|---|----|----|----|----|-----|-----|-----|--------|------|
| 144 | 1 | 4 | 0 | 0 | 1 | 0 | 0 | 1 | 0 | 0 | 1  | 0  | 0  | 1  | 6.9 | 2.2 | 2.2 | 58.224 | 538  |
| 145 | 0 | 1 | 0 | 0 | 0 | 0 | 0 | 1 | 0 | 0 | 0  | 0  | 0  | 1  | 0.3 | 0.3 | 0.3 | 499.1  | 4386 |
| 146 | 1 | 0 | 0 | 0 | 0 | 0 | 1 | 0 | 0 | 0 | 0  | 0  | 1  | 0  | 1.3 | 1.3 | 1.3 | 84.906 | 758  |
| 147 | 0 | 0 | 0 | 1 | 2 | 0 | 0 | 0 | 0 | 1 | 2  | 0  | 0  | 0  | 5.7 | 5.7 | 5.7 | 604.25 | 5656 |
| 148 | 2 | 0 | 0 | 0 | 2 | 0 | 2 | 0 | 0 | 0 | 2  | 0  | 2  | 0  | 2.9 | 2.9 | 2.9 | 148.45 | 1332 |
| 149 | 1 | 3 | 0 | 0 | 1 | 2 | 1 | 3 | 0 | 0 | 1  | 2  | 1  | 3  | 6.7 | 6.7 | 6.7 | 95.423 | 877  |
| 150 | 0 | 0 | 0 | 1 | 0 | 0 | 0 | 0 | 0 | 1 | 0  | 0  | 0  | 0  | 7.8 | 7.8 | 7.8 | 22.338 | 205  |

|     | Q | R | S | T | U | V | W | X | Y | Z | AA | AB | AC | AD | AE   | AF   | AG   | AH     | AI   |
|-----|---|---|---|---|---|---|---|---|---|---|----|----|----|----|------|------|------|--------|------|
| 151 | 0 | 0 | 0 | 0 | 1 | 0 | 0 | 0 | 0 | 0 | 1  | 0  | 0  | 0  | 0.6  | 0.6  | 0.6  | 141.49 | 1258 |
| 152 | 0 | 0 | 0 | 0 | 1 | 0 | 0 | 0 | 0 | 0 | 1  | 0  | 0  | 0  | 2.6  | 2.6  | 2.6  | 54.725 | 498  |
| 153 | 1 | 0 | 0 | 0 | 2 | 0 | 1 | 0 | 0 | 0 | 2  | 0  | 1  | 0  | 16.3 | 16.3 | 16.3 | 24.576 | 227  |
| 154 | 1 | 0 | 0 | 0 | 0 | 0 | 1 | 0 | 0 | 0 | 0  | 0  | 1  | 0  | 1.2  | 1.2  | 1.2  | 74.071 | 684  |
| 155 | 1 | 0 | 0 | 1 | 0 | 0 | 1 | 0 | 0 | 1 | 0  | 0  | 1  | 0  | 1.8  | 1.8  | 1.8  | 89.996 | 813  |

|     | Q | R | S | T | U | V | W | X | Y | Z | AA | AB | AC | AD | AE  | AF  | AG  | AH     | AI   |
|-----|---|---|---|---|---|---|---|---|---|---|----|----|----|----|-----|-----|-----|--------|------|
| 156 | 1 | 0 | 0 | 0 | 0 | 0 | 1 | 0 | 0 | 0 | 0  | 0  | 1  | 0  | 1.8 | 1.8 | 1.8 | 109.98 | 994  |
| 157 | 1 | 0 | 0 | 0 | 0 | 0 | 1 | 0 | 0 | 0 | 0  | 0  | 1  | 0  | 1   | 1   | 1   | 177.64 | 1591 |
| 158 | 0 | 0 | 1 | 0 | 1 | 0 | 0 | 0 | 1 | 0 | 1  | 0  | 0  | 0  | 1.8 | 1.8 | 1.8 | 129.64 | 1122 |
| 159 | 1 | 0 | 0 | 0 | 0 | 0 | 1 | 0 | 0 | 0 | 0  | 0  | 1  | 0  | 1.2 | 1.2 | 1.2 | 80.443 | 737  |
| 160 | 0 | 0 | 1 | 0 | 0 | 0 | 0 | 0 | 1 | 0 | 0  | 0  | 0  | 0  | 3.2 | 3.2 | 3.2 | 45.043 | 402  |

|     | Q | R | S | T | U | V | W | X | Y | Z | AA | AB | AC | AD | AE   | AF   | AG   | AH     | AI  |
|-----|---|---|---|---|---|---|---|---|---|---|----|----|----|----|------|------|------|--------|-----|
| 161 | 0 | 0 | 0 | 0 | 1 | 0 | 0 | 0 | 0 | 0 | 1  | 0  | 0  | 0  | 2    | 2    | 2    | 50.418 | 458 |
| 162 | 1 | 0 | 0 | 0 | 0 | 0 | 1 | 0 | 0 | 0 | 0  | 0  | 1  | 0  | 2.3  | 2.3  | 2.3  | 84.534 | 783 |
| 163 | 1 | 0 | 0 | 0 | 0 | 0 | 1 | 0 | 0 | 0 | 0  | 0  | 1  | 0  | 11.1 | 11.1 | 11.1 | 13.526 | 117 |
| 164 | 0 | 0 | 0 | 0 | 0 | 1 | 0 | 0 | 0 | 0 | 0  | 1  | 0  | 0  | 2.4  | 2.4  | 2.4  | 81.683 | 780 |
| 165 | 0 | 0 | 0 | 0 | 1 | 0 | 0 | 0 | 0 | 0 | 1  | 0  | 0  | 0  | 4.8  | 4.8  | 4.8  | 57.772 | 521 |
| 166 | 1 | 0 | 0 | 0 | 2 | 2 | 1 | 0 | 0 | 0 | 2  | 2  | 1  | 0  | 3.6  | 3.6  | 3.6  | 101.19 | 916 |
| 167 | 1 | 1 | 0 | 0 | 1 | 1 | 1 | 1 | 0 | 0 | 1  | 1  | 1  | 1  | 4    | 4    | 4    | 66.406 | 606 |
| 168 | 1 | 1 | 0 | 0 | 1 | 1 | 1 | 1 | 0 | 0 | 1  | 1  | 1  | 1  | 6.3  | 6.3  | 6.3  | 50.989 | 461 |

|     | Q | R | S  | T  | U | V | W | X | Y | Z | AA | AB | AC | AD | AE   | AF   | AG   | AH     | AI  |
|-----|---|---|----|----|---|---|---|---|---|---|----|----|----|----|------|------|------|--------|-----|
| 169 | 4 | 3 | 3  | 6  | 3 | 4 | 4 | 3 | 3 | 6 | 3  | 4  | 4  | 3  | 81.3 | 81.3 | 81.3 | 11.934 | 107 |
| 170 | 0 | 0 | 10 | 12 | 0 | 1 | 0 | 0 | 3 | 4 | 0  | 0  | 0  | 0  | 48.1 | 48.1 | 18.5 | 35.704 | 324 |

|     | Q | R | S | T | U | V | W | X | Y | Z | AA | AB | AC | AD | AE   | AF   | AG   | AH     | AI  |
|-----|---|---|---|---|---|---|---|---|---|---|----|----|----|----|------|------|------|--------|-----|
| 171 | 7 | 7 | 0 | 1 | 5 | 8 | 7 | 7 | 0 | 1 | 5  | 8  | 7  | 7  | 30.2 | 30.2 | 30.2 | 50.151 | 451 |
| 172 | 1 | 4 | 0 | 0 | 0 | 1 | 0 | 3 | 0 | 0 | 0  | 1  | 0  | 3  | 8.6  | 7.1  | 7.1  | 92.475 | 802 |
| 173 | 3 | 3 | 0 | 0 | 1 | 3 | 3 | 3 | 0 | 0 | 1  | 3  | 3  | 3  | 20.4 | 20.4 | 20.4 | 44.55  | 417 |
| 174 | 0 | 1 | 0 | 0 | 0 | 0 | 0 | 1 | 0 | 0 | 0  | 0  | 0  | 1  | 4    | 4    | 4    | 46.977 | 425 |
| 175 | 5 | 3 | 0 | 1 | 3 | 2 | 5 | 3 | 0 | 1 | 3  | 2  | 5  | 3  | 12.1 | 12.1 | 12.1 | 50.113 | 462 |



|     | Q | R | S | T | U | V | W | X | Y | Z | AA | AB | AC | AD | AE   | AF   | AG   | AH     | AI   |
|-----|---|---|---|---|---|---|---|---|---|---|----|----|----|----|------|------|------|--------|------|
| 176 | 2 | 2 | 0 | 1 | 2 | 2 | 2 | 2 | 0 | 1 | 2  | 2  | 2  | 2  | 9.1  | 9.1  | 9.1  | 37.279 | 339  |
| 177 | 1 | 0 | 0 | 0 | 0 | 2 | 1 | 0 | 0 | 0 | 0  | 2  | 1  | 0  | 7.5  | 7.5  | 7.5  | 41.29  | 362  |
| 178 | 0 | 2 | 1 | 2 | 0 | 1 | 0 | 2 | 1 | 2 | 0  | 1  | 0  | 2  | 24.6 | 24.6 | 24.6 | 14.888 | 134  |
| 179 | 0 | 0 | 0 | 1 | 0 | 0 | 0 | 0 | 0 | 1 | 0  | 0  | 0  | 0  | 1    | 1    | 1    | 149.58 | 1281 |
| 180 | 5 | 3 | 0 | 0 | 5 | 3 | 5 | 3 | 0 | 0 | 4  | 3  | 4  | 2  | 11.3 | 11.3 | 9.7  | 83.28  | 724  |

|     | Q | R | S | T | U | V | W | X | Y | Z | AA | AB | AC | AD | AE   | AF   | AG   | AH     | AI  |
|-----|---|---|---|---|---|---|---|---|---|---|----|----|----|----|------|------|------|--------|-----|
| 181 | 1 | 1 | 0 | 0 | 2 | 0 | 1 | 1 | 0 | 0 | 2  | 0  | 1  | 1  | 12.3 | 12.3 | 12.3 | 42.481 | 367 |
| 182 | 1 | 1 | 1 | 0 | 1 | 1 | 1 | 1 | 1 | 0 | 1  | 1  | 1  | 1  | 4.7  | 4.7  | 4.7  | 26.717 | 253 |
| 183 | 0 | 0 | 0 | 2 | 0 | 0 | 0 | 0 | 0 | 2 | 0  | 0  | 0  | 0  | 9.4  | 9.4  | 9.4  | 21.266 | 212 |
| 184 | 1 | 0 | 0 | 0 | 0 | 0 | 1 | 0 | 0 | 0 | 0  | 0  | 1  | 0  | 2.5  | 2.5  | 2.5  | 52.977 | 471 |
| 185 | 1 | 0 | 0 | 0 | 3 | 0 | 1 | 0 | 0 | 0 | 3  | 0  | 1  | 0  | 22   | 22   | 22   | 17.971 | 164 |
| 186 | 0 | 1 | 0 | 0 | 0 | 0 | 0 | 1 | 0 | 0 | 0  | 0  | 0  | 1  | 3.3  | 3.3  | 3.3  | 54.016 | 482 |
| 187 | 2 | 0 | 0 | 0 | 2 | 1 | 2 | 0 | 0 | 0 | 2  | 1  | 2  | 0  | 6.6  | 6.6  | 6.6  | 72.421 | 655 |

|     | Q  | R  | S | T | U  | V  | W  | X  | Y | Z | AA | AB | AC | AD | AE   | AF   | AG   | AH     | AI   |
|-----|----|----|---|---|----|----|----|----|---|---|----|----|----|----|------|------|------|--------|------|
| 188 | 0  | 9  | 0 | 9 | 2  | 1  | 0  | 9  | 0 | 9 | 2  | 1  | 0  | 9  | 31.1 | 29.6 | 29.6 | 53.687 | 466  |
| 189 | 0  | 0  | 0 | 0 | 1  | 0  | 0  | 0  | 0 | 0 | 1  | 0  | 0  | 0  | 1.1  | 1.1  | 1.1  | 161.93 | 1344 |
| 190 | 2  | 3  | 0 | 0 | 1  | 2  | 2  | 3  | 0 | 0 | 1  | 2  | 2  | 3  | 16.6 | 16.6 | 16.6 | 32.263 | 289  |
| 191 | 13 | 10 | 0 | 0 | 11 | 11 | 13 | 10 | 0 | 0 | 11 | 11 | 13 | 10 | 32.9 | 32.9 | 32.9 | 44.887 | 404  |

|     | Q | R | S | T | U | V | W | X | Y | Z | AA | AB | AC | AD | AE   | AF   | AG   | AH     | AI  |
|-----|---|---|---|---|---|---|---|---|---|---|----|----|----|----|------|------|------|--------|-----|
| 192 | 0 | 0 | 0 | 1 | 0 | 0 | 0 | 0 | 0 | 1 | 0  | 0  | 0  | 0  | 2.2  | 2.2  | 2.2  | 61.166 | 536 |
| 193 | 3 | 3 | 2 | 2 | 3 | 3 | 3 | 3 | 2 | 2 | 3  | 3  | 3  | 3  | 9.3  | 9.3  | 9.3  | 65.018 | 602 |
| 194 | 1 | 0 | 0 | 0 | 1 | 1 | 1 | 0 | 0 | 0 | 1  | 1  | 1  | 0  | 3.5  | 3.5  | 3.5  | 67.558 | 595 |
| 195 | 0 | 0 | 0 | 0 | 1 | 0 | 0 | 0 | 0 | 0 | 1  | 0  | 0  | 0  | 1.8  | 1.8  | 1.8  | 86.582 | 764 |
| 196 | 0 | 0 | 0 | 0 | 1 | 0 | 0 | 0 | 0 | 0 | 1  | 0  | 0  | 0  | 15.2 | 15.2 | 15.2 | 12.215 | 105 |
| 197 | 0 | 1 | 0 | 0 | 0 | 0 | 0 | 1 | 0 | 0 | 0  | 0  | 0  | 1  | 4.5  | 4.5  | 4.5  | 39.135 | 354 |
| 198 | 1 | 1 | 0 | 0 | 1 | 0 | 1 | 1 | 0 | 0 | 1  | 0  | 1  | 1  | 7.4  | 7.4  | 7.4  | 32.931 | 298 |

|     | Q  | R  | S | T | U  | V  | W  | X  | Y | Z | AA | AB | AC | AD | AE   | AF   | AG   | AH     | AI   |
|-----|----|----|---|---|----|----|----|----|---|---|----|----|----|----|------|------|------|--------|------|
| 199 | 14 | 13 | 0 | 2 | 14 | 12 | 14 | 13 | 0 | 2 | 14 | 12 | 14 | 13 | 42.2 | 42.2 | 42.2 | 57.844 | 531  |
| 200 | 0  | 0  | 0 | 1 | 0  | 0  | 0  | 0  | 0 | 1 | 0  | 0  | 0  | 0  | 1.3  | 1.3  | 1.3  | 151.08 | 1358 |
| 201 | 1  | 0  | 0 | 0 | 0  | 1  | 1  | 0  | 0 | 0 | 0  | 1  | 1  | 0  | 3    | 3    | 3    | 56.3   | 529  |
| 202 | 2  | 2  | 0 | 0 | 2  | 1  | 2  | 2  | 0 | 0 | 2  | 1  | 2  | 2  | 7    | 7    | 7    | 95.313 | 858  |
| 203 | 0  | 0  | 0 | 0 | 1  | 0  | 0  | 0  | 0 | 0 | 1  | 0  | 0  | 0  | 4.1  | 4.1  | 4.1  | 36.187 | 315  |

|     | Q  | R  | S | T | U  | V  | W  | X  | Y | Z | AA | AB | AC | AD | AE   | AF   | AG   | AH     | AI  |
|-----|----|----|---|---|----|----|----|----|---|---|----|----|----|----|------|------|------|--------|-----|
| 204 | 12 | 12 | 2 | 6 | 12 | 10 | 12 | 12 | 0 | 0 | 1  | 1  | 1  | 1  | 52.8 | 52.8 | 4.5  | 41.736 | 375 |
| 205 | 3  | 0  | 0 | 0 | 1  | 1  | 3  | 0  | 0 | 0 | 1  | 1  | 3  | 0  | 10.9 | 10.9 | 10.9 | 44.76  | 394 |
| 206 | 0  | 3  | 3 | 3 | 0  | 1  | 0  | 3  | 3 | 3 | 0  | 1  | 0  | 3  | 29.1 | 29.1 | 29.1 | 11.367 | 103 |
| 207 | 0  | 1  | 0 | 0 | 0  | 0  | 0  | 1  | 0 | 0 | 0  | 0  | 0  | 1  | 4.3  | 4.3  | 4.3  | 28.024 | 257 |
| 208 | 0  | 1  | 0 | 0 | 4  | 0  | 0  | 1  | 0 | 0 | 4  | 0  | 0  | 1  | 9.9  | 9.9  | 9.9  | 68.778 | 627 |

|     | Q  | R  | S | T | U | V | W | X | Y | Z | AA | AB | AC | AD | AE   | AF  | AG  | AH     | AI  |
|-----|----|----|---|---|---|---|---|---|---|---|----|----|----|----|------|-----|-----|--------|-----|
| 209 | 12 | 11 | 0 | 0 | 0 | 1 | 1 | 0 | 0 | 0 | 0  | 1  | 1  | 0  | 52.8 | 4.5 | 4.5 | 41.792 | 375 |
| 210 | 7  | 7  | 0 | 0 | 1 | 1 | 1 | 0 | 0 | 0 | 1  | 1  | 1  | 0  | 27.9 | 4.2 | 4.2 | 42.051 | 377 |
| 211 | 7  | 7  | 0 | 0 | 0 | 1 | 1 | 0 | 0 | 0 | 0  | 1  | 1  | 0  | 30.1 | 3.4 | 3.4 | 49.83  | 445 |
| 212 | 1  | 1  | 0 | 0 | 0 | 0 | 1 | 1 | 0 | 0 | 0  | 0  | 1  | 1  | 4    | 4   | 4   | 58.004 | 531 |

|     | Q  | R | S | T | U  | V | W  | X | Y | Z | AA | AB | AC | AD | AE   | AF   | AG   | AH     | AI   |
|-----|----|---|---|---|----|---|----|---|---|---|----|----|----|----|------|------|------|--------|------|
| 213 | 0  | 1 | 0 | 0 | 0  | 0 | 0  | 1 | 0 | 0 | 0  | 0  | 0  | 1  | 1.8  | 1.8  | 1.8  | 96.711 | 874  |
| 214 | 10 | 8 | 0 | 1 | 10 | 7 | 10 | 8 | 0 | 0 | 3  | 2  | 4  | 1  | 46.2 | 46.2 | 19.4 | 49.67  | 444  |
| 215 | 0  | 0 | 0 | 0 | 2  | 0 | 0  | 0 | 0 | 0 | 2  | 0  | 0  | 0  | 3.2  | 3.2  | 3.2  | 89.321 | 806  |
| 216 | 0  | 0 | 0 | 0 | 1  | 0 | 0  | 0 | 0 | 0 | 1  | 0  | 0  | 0  | 2.2  | 2.2  | 2.2  | 117.81 | 1058 |
| 217 | 0  | 1 | 0 | 0 | 0  | 1 | 0  | 1 | 0 | 0 | 0  | 1  | 0  | 1  | 9.3  | 9.3  | 9.3  | 25.991 | 246  |
| 218 | 0  | 1 | 0 | 1 | 0  | 0 | 0  | 1 | 0 | 1 | 0  | 0  | 0  | 1  | 2.7  | 2.7  | 2.7  | 81.8   | 745  |
| 219 | 0  | 0 | 1 | 0 | 0  | 0 | 0  | 0 | 1 | 0 | 0  | 0  | 0  | 0  | 1.6  | 1.6  | 1.6  | 52.045 | 447  |
| 220 | 0  | 1 | 0 | 0 | 0  | 0 | 0  | 1 | 0 | 0 | 0  | 0  | 0  | 1  | 1.8  | 1.8  | 1.8  | 76.8   | 681  |
| 221 | 0  | 0 | 1 | 0 | 0  | 0 | 0  | 0 | 1 | 0 | 0  | 0  | 0  | 0  | 1.7  | 1.7  | 1.7  | 118.75 | 1141 |



|     | Q | R | S | T | U | V | W | X | Y | Z | AA | AB | AC | AD | AE  | AF  | AG  | AH     | AI   |
|-----|---|---|---|---|---|---|---|---|---|---|----|----|----|----|-----|-----|-----|--------|------|
| 222 | 0 | 0 | 0 | 0 | 0 | 1 | 0 | 0 | 0 | 0 | 0  | 1  | 0  | 0  | 2.6 | 2.6 | 2.6 | 39.1   | 344  |
| 223 | 0 | 0 | 0 | 1 | 0 | 0 | 0 | 0 | 0 | 1 | 0  | 0  | 0  | 0  | 2.1 | 2.1 | 2.1 | 48.327 | 426  |
| 224 | 2 | 0 | 0 | 0 | 2 | 2 | 2 | 0 | 0 | 0 | 2  | 2  | 2  | 0  | 5.1 | 5.1 | 5.1 | 56.613 | 507  |
| 225 | 0 | 1 | 0 | 0 | 0 | 0 | 0 | 1 | 0 | 0 | 0  | 0  | 0  | 1  | 1.4 | 1.4 | 1.4 | 75.052 | 666  |
| 226 | 0 | 0 | 0 | 0 | 4 | 0 | 0 | 0 | 0 | 0 | 4  | 0  | 0  | 0  | 9.2 | 9.2 | 9.2 | 50.036 | 447  |
| 227 | 1 | 1 | 0 | 0 | 0 | 0 | 0 | 1 | 0 | 0 | 0  | 0  | 0  | 1  | 8.4 | 3.2 | 3.2 | 54.065 | 466  |
| 228 | 1 | 1 | 0 | 0 | 1 | 0 | 1 | 1 | 0 | 0 | 1  | 0  | 1  | 1  | 2.2 | 2.2 | 2.2 | 50.974 | 452  |
| 229 | 0 | 0 | 0 | 1 | 0 | 0 | 0 | 0 | 0 | 1 | 0  | 0  | 0  | 0  | 1.7 | 1.7 | 1.7 | 120.32 | 1074 |

|     | Q | R | S | T | U  | V | W | X | Y | Z | AA | AB | AC | AD | AE   | AF   | AG   | AH     | AI   |
|-----|---|---|---|---|----|---|---|---|---|---|----|----|----|----|------|------|------|--------|------|
| 230 | 3 | 4 | 1 | 1 | 1  | 1 | 1 | 1 | 1 | 1 | 1  | 1  | 1  | 1  | 6.1  | 1.5  | 1.5  | 62.844 | 594  |
| 231 | 0 | 0 | 0 | 1 | 0  | 0 | 0 | 0 | 0 | 1 | 0  | 0  | 0  | 0  | 1.5  | 1.5  | 1.5  | 67.963 | 602  |
| 232 | 0 | 0 | 1 | 0 | 0  | 0 | 0 | 0 | 1 | 0 | 0  | 0  | 0  | 0  | 1.2  | 1.2  | 1.2  | 112.28 | 1013 |
| 233 | 0 | 1 | 0 | 0 | 1  | 1 | 0 | 1 | 0 | 0 | 1  | 1  | 0  | 1  | 10.8 | 10.8 | 10.8 | 11.767 | 102  |
| 234 | 0 | 0 | 0 | 0 | 0  | 1 | 0 | 0 | 0 | 0 | 0  | 1  | 0  | 0  | 1.4  | 1.4  | 1.4  | 110.73 | 1017 |
| 235 | 0 | 0 | 0 | 1 | 0  | 0 | 0 | 0 | 0 | 1 | 0  | 0  | 0  | 0  | 0.5  | 0.5  | 0.5  | 219.89 | 2038 |
| 236 | 7 | 7 | 1 | 0 | 12 | 6 | 7 | 7 | 1 | 0 | 12 | 6  | 7  | 7  | 15.5 | 15.5 | 15.5 | 191.98 | 1679 |
| 237 | 0 | 1 | 1 | 1 | 2  | 1 | 0 | 1 | 1 | 1 | 2  | 1  | 0  | 1  | 5.9  | 5.9  | 5.9  | 70.148 | 627  |
| 238 | 1 | 0 | 0 | 0 | 1  | 0 | 1 | 0 | 0 | 0 | 1  | 0  | 1  | 0  | 6.7  | 6.7  | 6.7  | 50.537 | 445  |

|     | Q | R | S | T | U | V | W | X | Y | Z | AA | AB | AC | AD | AE   | AF   | AG   | AH     | AI  |
|-----|---|---|---|---|---|---|---|---|---|---|----|----|----|----|------|------|------|--------|-----|
| 239 | 3 | 6 | 1 | 0 | 0 | 0 | 0 | 0 | 0 | 0 | 0  | 0  | 0  | 0  | 27.9 | 2.5  | 0    | 52.866 | 484 |
| 240 | 1 | 0 | 0 | 0 | 1 | 1 | 1 | 0 | 0 | 0 | 1  | 1  | 1  | 0  | 3.3  | 3.3  | 3.3  | 73.101 | 662 |
| 241 | 0 | 0 | 0 | 0 | 1 | 0 | 0 | 0 | 0 | 0 | 1  | 0  | 0  | 0  | 2.1  | 2.1  | 2.1  | 69.676 | 612 |
| 242 | 0 | 0 | 0 | 1 | 0 | 0 | 0 | 0 | 0 | 1 | 0  | 0  | 0  | 0  | 16.7 | 16.7 | 16.7 | 15.765 | 144 |
| 243 | 2 | 3 | 0 | 0 | 1 | 2 | 2 | 3 | 0 | 0 | 1  | 2  | 2  | 3  | 13.5 | 13.5 | 13.5 | 43.096 | 406 |
| 244 | 1 | 1 | 0 | 0 | 1 | 2 | 1 | 1 | 0 | 0 | 0  | 1  | 0  | 1  | 10.2 | 10.2 | 5    | 53.737 | 463 |
| 245 | 1 | 0 | 0 | 0 | 1 | 0 | 1 | 0 | 0 | 0 | 1  | 0  | 1  | 0  | 11.2 | 11.2 | 11.2 | 17.897 | 161 |
| 246 | 0 | 0 | 1 | 0 | 0 | 0 | 0 | 0 | 1 | 0 | 0  | 0  | 0  | 0  | 3.3  | 3.3  | 3.3  | 50.611 | 455 |
| 247 | 0 | 0 | 1 | 0 | 0 | 0 | 0 | 0 | 1 | 0 | 0  | 0  | 0  | 0  | 4.2  | 4.2  | 4.2  | 21.308 | 191 |
| 248 | 0 | 0 | 0 | 0 | 1 | 0 | 0 | 0 | 0 | 0 | 1  | 0  | 0  | 0  | 2.1  | 2.1  | 2.1  | 44.771 | 387 |

|     | Q | R | S | T | U | V | W | X | Y | Z | AA | AB | AC | AD | AE  | AF  | AG  | AH     | AI   |
|-----|---|---|---|---|---|---|---|---|---|---|----|----|----|----|-----|-----|-----|--------|------|
| 249 | 1 | 0 | 0 | 0 | 0 | 0 | 1 | 0 | 0 | 0 | 0  | 0  | 1  | 0  | 0.6 | 0.6 | 0.6 | 157.84 | 1394 |
| 250 | 0 | 0 | 0 | 0 | 1 | 1 | 0 | 0 | 0 | 0 | 1  | 1  | 0  | 0  | 1.1 | 1.1 | 1.1 | 136.33 | 1230 |
| 251 | 0 | 0 | 1 | 0 | 0 | 0 | 0 | 0 | 1 | 0 | 0  | 0  | 0  | 0  | 0.6 | 0.6 | 0.6 | 196.69 | 1759 |
| 252 | 1 | 0 | 1 | 0 | 1 | 0 | 1 | 0 | 1 | 0 | 1  | 0  | 1  | 0  | 2.2 | 2.2 | 2.2 | 155.36 | 1426 |
| 253 | 0 | 0 | 1 | 1 | 1 | 0 | 0 | 0 | 1 | 1 | 1  | 0  | 0  | 0  | 4.1 | 4.1 | 4.1 | 26.221 | 246  |
| 254 | 1 | 0 | 0 | 0 | 0 | 0 | 1 | 0 | 0 | 0 | 0  | 0  | 1  | 0  | 6.9 | 6.9 | 6.9 | 22.605 | 204  |
| 255 | 0 | 0 | 1 | 0 | 0 | 0 | 0 | 0 | 1 | 0 | 0  | 0  | 0  | 0  | 0.7 | 0.7 | 0.7 | 277.82 | 2602 |
| 256 | 1 | 0 | 0 | 0 | 1 | 0 | 1 | 0 | 0 | 0 | 1  | 0  | 1  | 0  | 10  | 10  | 10  | 23.443 | 200  |
| 257 | 3 | 1 | 0 | 0 | 3 | 1 | 3 | 1 | 0 | 0 | 3  | 1  | 3  | 1  | 15  | 15  | 15  | 49.508 | 452  |

|     | Q | R | S | T | U | V | W | X | Y | Z | AA | AB | AC | AD | AE   | AF   | AG   | AH     | AI  |
|-----|---|---|---|---|---|---|---|---|---|---|----|----|----|----|------|------|------|--------|-----|
| 258 | 0 | 1 | 0 | 0 | 0 | 0 | 0 | 1 | 0 | 0 | 0  | 0  | 0  | 1  | 13.1 | 13.1 | 13.1 | 11.662 | 99  |
| 259 | 3 | 2 | 0 | 1 | 0 | 0 | 0 | 0 | 0 | 1 | 0  | 0  | 0  | 0  | 22.1 | 4.8  | 4.8  | 42.004 | 376 |
| 260 | 0 | 0 | 0 | 0 | 1 | 0 | 0 | 0 | 0 | 0 | 1  | 0  | 0  | 0  | 4.3  | 4.3  | 4.3  | 33.295 | 282 |
| 261 | 0 | 1 | 0 | 0 | 0 | 0 | 0 | 1 | 0 | 0 | 0  | 0  | 0  | 1  | 1.9  | 1.9  | 1.9  | 66.229 | 589 |
| 262 | 0 | 1 | 0 | 0 | 0 | 0 | 0 | 1 | 0 | 0 | 0  | 0  | 0  | 1  | 1.7  | 1.7  | 1.7  | 80.376 | 712 |
| 263 | 0 | 0 | 0 | 0 | 1 | 0 | 0 | 0 | 0 | 0 | 1  | 0  | 0  | 0  | 6.9  | 6.9  | 6.9  | 45.739 | 408 |
| 264 | 2 | 1 | 0 | 0 | 1 | 1 | 2 | 1 | 0 | 0 | 1  | 1  | 2  | 1  | 9    | 9    | 9    | 80.409 | 724 |
| 265 | 1 | 0 | 0 | 0 | 0 | 0 | 1 | 0 | 0 | 0 | 0  | 0  | 1  | 0  | 1.8  | 1.8  | 1.8  | 64.349 | 607 |

|     | Q | R | S | T | U | V | W | X | Y | Z | AA | AB | AC | AD | AE  | AF  | AG  | AH     | AI   |
|-----|---|---|---|---|---|---|---|---|---|---|----|----|----|----|-----|-----|-----|--------|------|
| 266 | 0 | 0 | 0 | 1 | 0 | 0 | 0 | 0 | 0 | 1 | 0  | 0  | 0  | 0  | 5   | 5   | 5   | 42.69  | 401  |
| 267 | 0 | 1 | 0 | 0 | 0 | 0 | 0 | 1 | 0 | 0 | 0  | 0  | 0  | 1  | 2.4 | 2.4 | 2.4 | 59.584 | 533  |
| 268 | 0 | 0 | 1 | 0 | 0 | 0 | 0 | 0 | 1 | 0 | 0  | 0  | 0  | 0  | 3   | 3   | 3   | 58.25  | 526  |
| 269 | 0 | 0 | 0 | 0 | 1 | 0 | 0 | 0 | 0 | 0 | 1  | 0  | 0  | 0  | 5.4 | 5.4 | 5.4 | 29.68  | 258  |
| 270 | 0 | 0 | 0 | 1 | 0 | 0 | 0 | 0 | 0 | 1 | 0  | 0  | 0  | 0  | 1.2 | 1.2 | 1.2 | 116.1  | 1042 |
| 271 | 1 | 0 | 1 | 0 | 1 | 0 | 1 | 0 | 1 | 0 | 1  | 0  | 1  | 0  | 2.2 | 2.2 | 2.2 | 55.432 | 495  |
| 272 | 0 | 0 | 0 | 1 | 0 | 0 | 0 | 0 | 0 | 1 | 0  | 0  | 0  | 0  | 1.8 | 1.8 | 1.8 | 78.748 | 733  |
| 273 | 0 | 1 | 0 | 1 | 0 | 0 | 0 | 1 | 0 | 1 | 0  | 0  | 0  | 1  | 2.2 | 2.2 | 2.2 | 71.647 | 628  |
| 274 | 0 | 0 | 0 | 1 | 0 | 0 | 0 | 0 | 0 | 1 | 0  | 0  | 0  | 0  | 1.4 | 1.4 | 1.4 | 82.302 | 731  |
| 275 | 1 | 0 | 0 | 0 | 1 | 0 | 1 | 0 | 0 | 0 | 1  | 0  | 1  | 0  | 3.9 | 3.9 | 3.9 | 41.523 | 362  |

|     | Q | R | S | T | U | V | W | X | Y | Z | AA | AB | AC | AD | AE  | AF  | AG  | AH     | AI   |
|-----|---|---|---|---|---|---|---|---|---|---|----|----|----|----|-----|-----|-----|--------|------|
| 276 | 0 | 1 | 0 | 0 | 0 | 0 | 0 | 1 | 0 | 0 | 0  | 0  | 0  | 1  | 1.7 | 1.7 | 1.7 | 79.175 | 707  |
| 277 | 0 | 0 | 1 | 0 | 0 | 0 | 0 | 0 | 1 | 0 | 0  | 0  | 0  | 0  | 1.9 | 1.9 | 1.9 | 108.19 | 964  |
| 278 | 0 | 1 | 0 | 0 | 0 | 2 | 0 | 1 | 0 | 0 | 0  | 2  | 0  | 1  | 4.1 | 4.1 | 4.1 | 75.634 | 665  |
| 279 | 0 | 0 | 0 | 0 | 0 | 1 | 0 | 0 | 0 | 0 | 0  | 1  | 0  | 0  | 1   | 1   | 1   | 118.27 | 1033 |
| 280 | 1 | 0 | 0 | 0 | 1 | 0 | 1 | 0 | 0 | 0 | 1  | 0  | 1  | 0  | 1.4 | 1.4 | 1.4 | 115.97 | 1025 |
| 281 | 0 | 0 | 1 | 1 | 0 | 1 | 0 | 0 | 1 | 1 | 0  | 1  | 0  | 0  | 2.4 | 2.4 | 2.4 | 226.37 | 1960 |
| 282 | 1 | 0 | 0 | 0 | 0 | 1 | 1 | 0 | 0 | 0 | 0  | 1  | 1  | 0  | 2.4 | 2.4 | 2.4 | 100.2  | 908  |
| 283 | 0 | 0 | 0 | 0 | 0 | 1 | 0 | 0 | 0 | 0 | 0  | 1  | 0  | 0  | 2.9 | 2.9 | 2.9 | 35.207 | 314  |
| 284 | 0 | 0 | 0 | 1 | 0 | 0 | 0 | 0 | 0 | 1 | 0  | 0  | 0  | 0  | 2.4 | 2.4 | 2.4 | 67.732 | 590  |
| 285 | 1 | 0 | 0 | 0 | 1 | 1 | 1 | 0 | 0 | 0 | 1  | 1  | 1  | 0  | 2.8 | 2.8 | 2.8 | 82.499 | 740  |
| 286 | 0 | 0 | 1 | 0 | 0 | 0 | 0 | 0 | 1 | 0 | 0  | 0  | 0  | 0  | 4.5 | 4.5 | 4.5 | 39.832 | 352  |

|     | Q | R | S | T | U | V | W | X | Y | Z | AA | AB | AC | AD | AE  | AF  | AG  | AH     | AI   |
|-----|---|---|---|---|---|---|---|---|---|---|----|----|----|----|-----|-----|-----|--------|------|
| 287 | 0 | 1 | 0 | 0 | 0 | 0 | 0 | 1 | 0 | 0 | 0  | 0  | 0  | 1  | 1.7 | 1.7 | 1.7 | 68.215 | 600  |
| 288 | 0 | 1 | 0 | 0 | 0 | 1 | 0 | 1 | 0 | 0 | 0  | 1  | 0  | 1  | 1.7 | 1.7 | 1.7 | 85.652 | 749  |
| 289 | 1 | 0 | 0 | 0 | 0 | 0 | 1 | 0 | 0 | 0 | 0  | 0  | 1  | 0  | 2.7 | 2.7 | 2.7 | 78.756 | 698  |
| 290 | 1 | 0 | 1 | 0 | 0 | 1 | 1 | 0 | 1 | 0 | 0  | 1  | 1  | 0  | 2.2 | 2.2 | 2.2 | 72.72  | 638  |
| 291 | 2 | 2 | 0 | 0 | 3 | 2 | 2 | 2 | 0 | 0 | 3  | 2  | 2  | 2  | 9.8 | 9.8 | 9.8 | 47.357 | 418  |
| 292 | 0 | 0 | 0 | 0 | 0 | 1 | 0 | 0 | 0 | 0 | 0  | 1  | 0  | 0  | 3.7 | 3.7 | 3.7 | 48.791 | 431  |
| 293 | 0 | 0 | 0 | 0 | 1 | 0 | 0 | 0 | 0 | 0 | 1  | 0  | 0  | 0  | 1.4 | 1.4 | 1.4 | 121.43 | 1089 |
| 294 | 1 | 0 | 0 | 0 | 0 | 0 | 1 | 0 | 0 | 0 | 0  | 0  | 1  | 0  | 2.2 | 2.2 | 2.2 | 52.401 | 458  |
| 295 | 0 | 0 | 0 | 0 | 0 | 1 | 0 | 0 | 0 | 0 | 0  | 1  | 0  | 0  | 3.4 | 3.4 | 3.4 | 43.478 | 386  |
| 296 | 0 | 0 | 0 | 0 | 1 | 0 | 0 | 0 | 0 | 0 | 1  | 0  | 0  | 0  | 7.8 | 7.8 | 7.8 | 23.407 | 204  |



|     | Q | R | S | T | U | V | W | X | Y | Z | AA | AB | AC | AD | AE   | AF   | AG   | AH     | AI  |
|-----|---|---|---|---|---|---|---|---|---|---|----|----|----|----|------|------|------|--------|-----|
| 297 | 1 | 1 | 1 | 1 | 1 | 1 | 1 | 1 | 1 | 1 | 1  | 1  | 1  | 1  | 4.9  | 4.9  | 4.9  | 26.422 | 247 |
| 298 | 0 | 0 | 0 | 0 | 1 | 0 | 0 | 0 | 0 | 0 | 1  | 0  | 0  | 0  | 11.3 | 11.3 | 11.3 | 15.944 | 142 |
| 299 | 0 | 0 | 0 | 0 | 0 | 1 | 0 | 0 | 0 | 0 | 0  | 1  | 0  | 0  | 2.5  | 2.5  | 2.5  | 49.77  | 438 |
| 300 | 0 | 1 | 0 | 0 | 0 | 0 | 0 | 1 | 0 | 0 | 0  | 0  | 0  | 1  | 4.3  | 4.3  | 4.3  | 44.933 | 392 |
| 301 | 0 | 0 | 0 | 1 | 1 | 0 | 0 | 0 | 0 | 1 | 1  | 0  | 0  | 0  | 7.3  | 7.3  | 7.3  | 16.564 | 151 |
| 302 | 0 | 0 | 1 | 0 | 0 | 0 | 0 | 0 | 1 | 0 | 0  | 0  | 0  | 0  | 4.5  | 4.5  | 4.5  | 34.837 | 310 |
| 303 | 0 | 0 | 0 | 0 | 1 | 0 | 0 | 0 | 0 | 0 | 1  | 0  | 0  | 0  | 6.3  | 6.3  | 6.3  | 43.185 | 381 |
| 304 | 0 | 0 | 0 | 1 | 0 | 0 | 0 | 0 | 0 | 1 | 0  | 0  | 0  | 0  | 1.9  | 1.9  | 1.9  | 74.091 | 667 |
| 305 | 6 | 6 | 0 | 0 | 5 | 6 | 6 | 6 | 0 | 0 | 5  | 6  | 6  | 6  | 19.7 | 19.7 | 19.7 | 53.247 | 483 |
| 306 | 1 | 0 | 0 | 0 | 0 | 0 | 1 | 0 | 0 | 0 | 0  | 0  | 1  | 0  | 5.3  | 5.3  | 5.3  | 37.984 | 361 |

|     | Q | R | S | T | U | V | W | X | Y | Z | AA | AB | AC | AD | AE   | AF   | AG   | AH     | AI   |
|-----|---|---|---|---|---|---|---|---|---|---|----|----|----|----|------|------|------|--------|------|
| 307 | 1 | 0 | 0 | 0 | 1 | 1 | 1 | 0 | 0 | 0 | 1  | 1  | 1  | 0  | 5.5  | 5.5  | 5.5  | 91.712 | 796  |
| 308 | 0 | 0 | 0 | 0 | 1 | 0 | 0 | 0 | 0 | 0 | 1  | 0  | 0  | 0  | 5.6  | 5.6  | 5.6  | 27.784 | 248  |
| 309 | 1 | 1 | 0 | 0 | 1 | 1 | 1 | 1 | 0 | 0 | 1  | 1  | 1  | 1  | 0.8  | 0.8  | 0.8  | 532.04 | 4644 |
| 310 | 0 | 1 | 0 | 0 | 0 | 0 | 0 | 1 | 0 | 0 | 0  | 0  | 0  | 1  | 14.1 | 14.1 | 14.1 | 9.5589 | 85   |
| 311 | 0 | 1 | 0 | 1 | 3 | 1 | 0 | 1 | 0 | 1 | 3  | 1  | 0  | 1  | 5.4  | 5.4  | 5.4  | 188.74 | 1657 |
| 312 | 0 | 0 | 0 | 0 | 1 | 0 | 0 | 0 | 0 | 0 | 1  | 0  | 0  | 0  | 1.3  | 1.3  | 1.3  | 167.38 | 1578 |
| 313 | 0 | 0 | 1 | 0 | 0 | 0 | 0 | 0 | 1 | 0 | 0  | 0  | 0  | 0  | 2.2  | 2.2  | 2.2  | 60.582 | 549  |
| 314 | 0 | 1 | 0 | 0 | 0 | 0 | 0 | 1 | 0 | 0 | 0  | 0  | 0  | 1  | 8.1  | 8.1  | 8.1  | 26.274 | 246  |
| 315 | 0 | 0 | 0 | 1 | 0 | 0 | 0 | 0 | 0 | 1 | 0  | 0  | 0  | 0  | 3.1  | 3.1  | 3.1  | 42.164 | 381  |
| 316 | 0 | 1 | 0 | 0 | 0 | 0 | 0 | 1 | 0 | 0 | 0  | 0  | 0  | 1  | 5.6  | 5.6  | 5.6  | 30.221 | 267  |
| 317 | 1 | 0 | 0 | 0 | 1 | 0 | 1 | 0 | 0 | 0 | 1  | 0  | 1  | 0  | 6.1  | 6.1  | 6.1  | 53.12  | 474  |

|     | Q | R | S | T | U | V | W | X | Y | Z | AA | AB | AC | AD | AE  | AF  | AG  | AH     | AI   |
|-----|---|---|---|---|---|---|---|---|---|---|----|----|----|----|-----|-----|-----|--------|------|
| 318 | 1 | 1 | 0 | 0 | 1 | 1 | 1 | 1 | 0 | 0 | 1  | 1  | 1  | 1  | 7.6 | 7.6 | 7.6 | 66.739 | 589  |
| 319 | 0 | 0 | 0 | 1 | 0 | 0 | 0 | 0 | 0 | 1 | 0  | 0  | 0  | 0  | 1   | 1   | 1   | 130.15 | 1216 |
| 320 | 1 | 0 | 0 | 0 | 1 | 1 | 1 | 0 | 0 | 0 | 1  | 1  | 1  | 0  | 7.5 | 7.5 | 7.5 | 27.013 | 241  |
| 321 | 1 | 1 | 0 | 1 | 1 | 1 | 1 | 1 | 0 | 1 | 1  | 1  | 1  | 1  | 8.1 | 8.1 | 8.1 | 26.134 | 246  |
| 322 | 0 | 0 | 1 | 0 | 0 | 0 | 0 | 0 | 1 | 0 | 0  | 0  | 0  | 0  | 0.8 | 0.8 | 0.8 | 118.39 | 1052 |
| 323 | 0 | 0 | 0 | 0 | 0 | 1 | 0 | 0 | 0 | 0 | 0  | 1  | 0  | 0  | 0   | 0   | 0   | 168.86 | 1519 |
| 324 | 0 | 1 | 0 | 0 | 0 | 0 | 0 | 1 | 0 | 0 | 0  | 0  | 0  | 1  | 0   | 0   | 0   | 28.441 | 252  |

|     | Q | R | S | T | U | V | W | X | Y | Z | AA | AB | AC | AD | AE | AF | AG | AH     | AI   |
|-----|---|---|---|---|---|---|---|---|---|---|----|----|----|----|----|----|----|--------|------|
| 325 | 0 | 0 | 1 | 0 | 0 | 0 | 0 | 0 | 1 | 0 | 0  | 0  | 0  | 0  | 0  | 0  | 0  | 47.907 | 430  |
| 326 | 1 | 0 | 0 | 0 | 0 | 1 | 1 | 0 | 0 | 0 | 0  | 1  | 1  | 0  | 0  | 0  | 0  | 466.71 | 4072 |
| 327 | 0 | 0 | 0 | 0 | 0 | 1 | 0 | 0 | 0 | 0 | 0  | 1  | 0  | 0  | 0  | 0  | 0  | 122.99 | 1102 |
| 328 | 1 | 0 | 0 | 0 | 0 | 0 | 1 | 0 | 0 | 0 | 0  | 0  | 1  | 0  | 0  | 0  | 0  | 70.705 | 642  |
| 329 | 0 | 0 | 0 | 0 | 0 | 1 | 0 | 0 | 0 | 0 | 0  | 1  | 0  | 0  | 0  | 0  | 0  | 17.201 | 151  |
| 330 | 0 | 0 | 0 | 0 | 0 | 1 | 0 | 0 | 0 | 0 | 0  | 1  | 0  | 0  | 0  | 0  | 0  | 80.653 | 728  |

|     | Q | R | S | T | U | V | W | X | Y | Z | AA | AB | AC | AD | AE | AF | AG | AH     | AI   |
|-----|---|---|---|---|---|---|---|---|---|---|----|----|----|----|----|----|----|--------|------|
| 331 | 0 | 0 | 0 | 0 | 1 | 0 | 0 | 0 | 0 | 0 | 1  | 0  | 0  | 0  | 0  | 0  | 0  | 48.601 | 426  |
| 332 | 1 | 0 | 0 | 0 | 0 | 0 | 1 | 0 | 0 | 0 | 0  | 0  | 1  | 0  | 0  | 0  | 0  | 30.071 | 271  |
| 333 | 0 | 0 | 0 | 1 | 0 | 0 | 0 | 0 | 0 | 1 | 0  | 0  | 0  | 0  | 0  | 0  | 0  | 133.37 | 1153 |
| 334 | 0 | 1 | 0 | 0 | 0 | 0 | 0 | 1 | 0 | 0 | 0  | 0  | 0  | 1  | 0  | 0  | 0  | 86.791 | 774  |
| 335 | 0 | 0 | 1 | 0 | 0 | 0 | 0 | 0 | 1 | 0 | 0  | 0  | 0  | 0  | 0  | 0  | 0  | 126.82 | 1142 |

|     | Q | R | S | T | U | V | W | X | Y | Z | AA | AB | AC | AD | AE | AF | AG | AH     | AI   |
|-----|---|---|---|---|---|---|---|---|---|---|----|----|----|----|----|----|----|--------|------|
| 336 | 0 | 0 | 0 | 0 | 1 | 0 | 0 | 0 | 0 | 0 | 1  | 0  | 0  | 0  | 0  | 0  | 0  | 17.942 | 158  |
| 337 | 0 | 0 | 0 | 1 | 0 | 0 | 0 | 0 | 0 | 1 | 0  | 0  | 0  | 0  | 0  | 0  | 0  | 225.46 | 2158 |
| 338 | 0 | 0 | 0 | 1 | 0 | 0 | 0 | 0 | 0 | 1 | 0  | 0  | 0  | 0  | 0  | 0  | 0  | 49.937 | 450  |
| 339 | 0 | 0 | 1 | 0 | 0 | 0 | 0 | 0 | 1 | 0 | 0  | 0  | 0  | 0  | 0  | 0  | 0  | 73.717 | 663  |
| 340 | 1 | 1 | 0 | 0 | 1 | 1 | 1 | 1 | 0 | 0 | 1  | 1  | 1  | 1  | 0  | 0  | 0  | 21.316 | 195  |
| 341 | 1 | 0 | 0 | 0 | 0 | 0 | 1 | 0 | 0 | 0 | 0  | 0  | 1  | 0  | 0  | 0  | 0  | 10.308 | 88   |



|     | Q | R | S | T | U | V | W | X | Y | Z | AA | AB | AC | AD | AE | AF | AG | AH     | AI   |
|-----|---|---|---|---|---|---|---|---|---|---|----|----|----|----|----|----|----|--------|------|
| 349 | 1 | 0 | 0 | 0 | 0 | 0 | 1 | 0 | 0 | 0 | 0  | 0  | 1  | 0  | 0  | 0  | 0  | 138.39 | 1216 |



|   | AJ                              | AK      | AL     | AM                                      | AN                                          | AO                                     | AP                                         | AQ                                     | AR                                         | AS        | AT                          | AU                              | AV                         | AW                             | AX                         | AY                             |
|---|---------------------------------|---------|--------|-----------------------------------------|---------------------------------------------|----------------------------------------|--------------------------------------------|----------------------------------------|--------------------------------------------|-----------|-----------------------------|---------------------------------|----------------------------|--------------------------------|----------------------------|--------------------------------|
| 1 | Sequence lengths                | Q-value | Score  | Sequence coverage WT Pooled LPS IgG [%] | Sequence coverage WT Pooled LPS_ATP IgG [%] | Sequence coverage WT1 LPS NLRP3 IP [%] | Sequence coverage WT1 LPS-ATP NLRP3 IP [%] | Sequence coverage WT2 LPS NLRP3 IP [%] | Sequence coverage WT2 LPS-ATP NLRP3 IP [%] | Intensity | Intensity WT Pooled LPS IgG | Intensity WT Pooled LPS_ATP IgG | Intensity WT1 LPS NLRP3 IP | Intensity WT1 LPS-ATP NLRP3 IP | Intensity WT2 LPS NLRP3 IP | Intensity WT2 LPS-ATP NLRP3 IP |
| 2 | 117;117;115;128                 | 0       | 20.558 | 0                                       | 0                                           | 12.8                                   | 12.8                                       | 12.8                                   | 12.8                                       | 20800000  | 0                           | 0                               | 8282900                    | 3544200                        | 5524300                    | 3449100                        |
| 3 | 100;120;120;121;<br>121;101;121 | 0       | 172.56 | 15                                      | 15                                          | 0                                      | 0                                          | 0                                      | 0                                          | 1617300   | 943230                      | 674060                          | 0                          | 0                              | 0                          | 0                              |
| 4 | 123                             | 0.035   | 1.3608 | 7.3                                     | 0                                           | 0                                      | 0                                          | 0                                      | 0                                          | 203220    | 203220                      | 0                               | 0                          | 0                              | 0                          | 0                              |
| 5 | 324;393                         | 0       | 2.6205 | 31.2                                    | 32.7                                        | 0                                      | 3.7                                        | 0                                      | 0                                          | 16676000  | 15626000                    | 1050600                         | 0                          | 0                              | 0                          | 0                              |





|    | AJ                              | AK     | AL     | AM | AN  | AO   | AP | AQ | AR   | AS        | AT | AU | AV        | AW       | AX       | AY       |
|----|---------------------------------|--------|--------|----|-----|------|----|----|------|-----------|----|----|-----------|----------|----------|----------|
| 13 | 335;404;335;336;<br>405;330;398 | 0      | 283.6  | 0  | 3.6 | 38.5 | 31 | 31 | 24.5 | 300320000 | 0  | 0  | 115530000 | 47183000 | 95830000 | 41774000 |
| 14 | 239;467                         | 1      | -2     | 0  | 0   | 5.9  | 0  | 0  | 0    | 0         | 0  | 0  | 0         | 0        | 0        | 0        |
| 15 | 53;118;184;184                  | 0.0317 | 1.4241 | 0  | 0   | 22.6 | 0  | 0  | 0    | 81663     | 0  | 0  | 81663     | 0        | 0        | 0        |

|    | AJ              | AK     | AL     | AM  | AN | AO   | AP   | AQ  | AR  | AS      | AT | AU | AV     | AW    | AX     | AY    |
|----|-----------------|--------|--------|-----|----|------|------|-----|-----|---------|----|----|--------|-------|--------|-------|
| 16 | 181;529;784;530 | 0.0081 | 2.2033 | 0   | 0  | 8.8  | 0    | 0   | 0   | 0       | 0  | 0  | 0      | 0     | 0      | 0     |
| 17 | 89;469          | 0.0472 | 1.2226 | 0   | 0  | 0    | 19.1 | 0   | 0   | 0       | 0  | 0  | 0      | 0     | 0      | 0     |
| 18 | 795;796         | 0      | 2.281  | 1.6 | 0  | 1.6  | 0    | 0   | 0   | 0       | 0  | 0  | 0      | 0     | 0      | 0     |
| 19 | 471;519;229;196 | 0      | 9.733  | 0   | 0  | 12.1 | 2.8  | 6.4 | 2.8 | 1279700 | 0  | 0  | 920870 | 42592 | 284150 | 32068 |



|    | AJ                                              | AK     | AL     | AM  | AN  | AO | AP  | AQ  | AR  | AS     | AT    | AU    | AV | AW    | AX    | AY |
|----|-------------------------------------------------|--------|--------|-----|-----|----|-----|-----|-----|--------|-------|-------|----|-------|-------|----|
| 25 | 1220;1220                                       | 1      | -2     | 0   | 0   | 0  | 1.5 | 0   | 0   | 0      | 0     | 0     | 0  | 0     | 0     | 0  |
| 26 | 1263;1287                                       | 0.0296 | 1.5845 | 0   | 1.1 | 0  | 1.1 | 0   | 0   | 0      | 0     | 0     | 0  | 0     | 0     | 0  |
| 27 | 707;742;750;746;<br>747                         | 1      | -2     | 0   | 0   | 0  | 0   | 0   | 1.8 | 0      | 0     | 0     | 0  | 0     | 0     | 0  |
| 28 | 335;326                                         | 0      | 2.2761 | 2.7 | 2.7 | 0  | 2.7 | 2.7 | 0   | 278560 | 84527 | 71871 | 0  | 42745 | 79416 | 0  |
| 29 | 129;193;210;245;<br>257;276;281;552;<br>660;281 | 0.0265 | 1.7132 | 0   | 0   | 0  | 0   | 9.3 | 0   | 54514  | 0     | 0     | 0  | 0     | 54514 | 0  |





|    | AJ                                                    | AK     | AL     | AM  | AN  | AO   | AP  | AQ | AR | AS     | AT | AU    | AV     | AW    | AX | AY |
|----|-------------------------------------------------------|--------|--------|-----|-----|------|-----|----|----|--------|----|-------|--------|-------|----|----|
| 34 | 1061;1405                                             | 0.0326 | 1.441  | 1.5 | 1.5 | 0    | 0   | 0  | 0  | 0      | 0  | 0     | 0      | 0     | 0  | 0  |
| 35 | 861                                                   | 1      | -2     | 1.3 | 0   | 0    | 0   | 0  | 0  | 0      | 0  | 0     | 0      | 0     | 0  | 0  |
| 36 | 641;750;827                                           | 1      | -2     | 2.2 | 0   | 0    | 0   | 0  | 0  | 0      | 0  | 0     | 0      | 0     | 0  | 0  |
| 37 | 802;802                                               | 1      | -2     | 0   | 0   | 0    | 2   | 0  | 0  | 0      | 0  | 0     | 0      | 0     | 0  | 0  |
| 38 | 176;201;236;315;<br>332;361;332;66;6<br>8;104;128;205 | 0      | 3.0908 | 0   | 9.7 | 14.8 | 9.7 | 0  | 0  | 216460 | 0  | 18132 | 168930 | 29398 | 0  | 0  |

|    | AJ                         | AK     | AL     | AM | AN   | AO  | AP  | AQ | AR  | AS     | AT | AU | AV     | AW | AX | AY    |
|----|----------------------------|--------|--------|----|------|-----|-----|----|-----|--------|----|----|--------|----|----|-------|
| 39 | 120;199;492;456            | 0.0221 | 1.9523 | 0  | 0    | 0   | 0   | 0  | 15  | 80282  | 0  | 0  | 0      | 0  | 0  | 80282 |
| 40 | 58;3829;3847;38<br>58;3859 | 1      | -2     | 0  | 34.5 | 0   | 0   | 0  | 0   | 0      | 0  | 0  | 0      | 0  | 0  | 0     |
| 41 | 734;761;767;738            | 0.0323 | 1.4286 | 0  | 2    | 0   | 0   | 0  | 0   | 0      | 0  | 0  | 0      | 0  | 0  | 0     |
| 42 | 1434                       | 0.046  | 1.2114 | 0  | 0    | 1.3 | 0   | 0  | 0   | 254210 | 0  | 0  | 254210 | 0  | 0  | 0     |
| 43 | 1323;1386;1312             | 0.033  | 1.4683 | 0  | 1.1  | 0   | 1.1 | 0  | 1.1 | 0      | 0  | 0  | 0      | 0  | 0  | 0     |







|    | AJ                      | AK     | AL     | AM  | AN | AO  | AP | AQ  | AR  | AS     | AT | AU | AV | AW    | AX     | AY |
|----|-------------------------|--------|--------|-----|----|-----|----|-----|-----|--------|----|----|----|-------|--------|----|
| 59 | 248;456                 | 0.0484 | 1.1679 | 3.6 | 0  | 0   | 0  | 0   | 0   | 0      | 0  | 0  | 0  | 0     | 0      | 0  |
| 60 | 713                     | 0.0383 | 1.321  | 2.8 | 0  | 0   | 0  | 0   | 0   | 0      | 0  | 0  | 0  | 0     | 0      | 0  |
| 61 | 4453;4459;4481;<br>4481 | 0.0278 | 1.8361 | 0   | 0  | 0   | 0  | 0   | 0.3 | 0      | 0  | 0  | 0  | 0     | 0      | 0  |
| 62 | 438;1066                | 0.0319 | 1.4268 | 0   | 0  | 4.1 | 0  | 0   | 4.1 | 0      | 0  | 0  | 0  | 0     | 0      | 0  |
| 63 | 615;631                 | 0      | 3.2807 | 0   | 0  | 0   | 2  | 3.7 | 0   | 290410 | 0  | 0  | 0  | 58408 | 232000 | 0  |

|    | AJ                              | AK     | AL     | AM | AN | AO  | AP | AQ | AR   | AS      | AT      | AU | AV      | AW | AX | AY |
|----|---------------------------------|--------|--------|----|----|-----|----|----|------|---------|---------|----|---------|----|----|----|
| 64 | 560;802;838;972;<br>2087        | 0.0464 | 1.216  | 5  | 0  | 0   | 0  | 0  | 0    | 0       | 0       | 0  | 0       | 0  | 0  | 0  |
| 65 | 151;231                         | 0.0448 | 1.2604 | 0  | 0  | 0   | 0  | 0  | 11.9 | 0       | 0       | 0  | 0       | 0  | 0  | 0  |
| 66 | 565                             | 1      | -2     | 0  | 0  | 2.3 | 0  | 0  | 0    | 1070100 | 0       | 0  | 1070100 | 0  | 0  | 0  |
| 67 | 658;725;741                     | 0.0478 | 1.2303 | 0  | 0  | 1.8 | 0  | 0  | 0    | 0       | 0       | 0  | 0       | 0  | 0  | 0  |
| 68 | 33467;33467;352<br>13;3409;8272 | 0      | 2.3099 | 0  | 0  | 0.1 | 0  | 0  | 0    | 4032300 | 4032300 | 0  | 0       | 0  | 0  | 0  |

|    | AJ                                                  | AK     | AL     | AM  | AN  | AO   | AP  | AQ  | AR  | AS      | AT | AU | AV     | AW    | AX     | AY    |
|----|-----------------------------------------------------|--------|--------|-----|-----|------|-----|-----|-----|---------|----|----|--------|-------|--------|-------|
| 69 | 483;659                                             | 0      | 30.703 | 0   | 0   | 0    | 2.3 | 2.3 | 2.3 | 65120   | 0  | 0  | 0      | 40416 | 24704  | 0     |
| 70 | 291;243                                             | 0.0476 | 1.1473 | 5.5 | 5.5 | 0    | 0   | 0   | 0   | 0       | 0  | 0  | 0      | 0     | 0      | 0     |
| 71 | 462                                                 | 0      | 10.405 | 1.9 | 1.9 | 1.9  | 1.9 | 1.9 | 0   | 0       | 0  | 0  | 0      | 0     | 0      | 0     |
| 72 | 418;364;180;190;<br>236;209;364;419;<br>193;364;363 | 0      | 7.9918 | 0   | 0   | 13.2 | 0   | 3.1 | 3.3 | 1126000 | 0  | 0  | 946660 | 0     | 90705  | 88652 |
| 73 | 325;316                                             | 0.0313 | 1.397  | 0   | 0   | 4    | 0   | 0   | 0   | 0       | 0  | 0  | 0      | 0     | 0      | 0     |
| 74 | 103;145;147;201;<br>147;147;147                     | 0.0268 | 1.7406 | 0   | 0   | 0    | 0   | 9.7 | 0   | 517350  | 0  | 0  | 0      | 0     | 517350 | 0     |



|    | AJ                    | AK     | AL     | AM   | AN   | AO  | AP | AQ  | AR  | AS     | AT | AU | AV     | AW | AX     | AY |
|----|-----------------------|--------|--------|------|------|-----|----|-----|-----|--------|----|----|--------|----|--------|----|
| 75 | 68;98;68;76;85;98;108 | 0.0345 | 1.3514 | 0    | 13.2 | 0   | 0  | 0   | 0   | 0      | 0  | 0  | 0      | 0  | 0      | 0  |
| 76 | 155                   | 0.0487 | 1.2534 | 13.5 | 0    | 0   | 0  | 0   | 0   | 0      | 0  | 0  | 0      | 0  | 0      | 0  |
| 77 | 121                   | 1      | -2     | 12.4 | 0    | 0   | 0  | 0   | 0   | 0      | 0  | 0  | 0      | 0  | 0      | 0  |
| 78 | 523                   | 0.049  | 1.1804 | 0    | 0    | 0   | 0  | 0   | 3.8 | 0      | 0  | 0  | 0      | 0  | 0      | 0  |
| 79 | 229;274               | 0.0327 | 1.7041 | 0    | 0    | 4.8 | 0  | 4.8 | 0   | 360070 | 0  | 0  | 181670 | 0  | 178400 | 0  |
| 80 | 827;975;835           | 0.0419 | 1.3066 | 0    | 0    | 0   | 0  | 1.2 | 0   | 0      | 0  | 0  | 0      | 0  | 0      | 0  |
| 81 | 1133                  | 0.0313 | 1.655  | 0    | 0    | 0   | 0  | 0   | 1.2 | 0      | 0  | 0  | 0      | 0  | 0      | 0  |

|    | AJ              | AK     | AL     | AM  | AN  | AO   | AP   | AQ   | AR   | AS       | AT      | AU      | AV      | AW      | AX      | AY      |
|----|-----------------|--------|--------|-----|-----|------|------|------|------|----------|---------|---------|---------|---------|---------|---------|
| 82 | 280;2639;2647   | 0.0276 | 1.8058 | 0   | 10  | 10   | 0    | 10   | 10   | 770070   | 0       | 121460  | 330760  | 0       | 235820  | 82025   |
| 83 | 137;200;299     | 0.0455 | 1.2676 | 0   | 0   | 13.9 | 0    | 0    | 0    | 0        | 0       | 0       | 0       | 0       | 0       | 0       |
| 84 | 172             | 0.0309 | 1.387  | 0   | 0   | 0    | 0    | 0    | 7.6  | 583820   | 0       | 0       | 0       | 0       | 0       | 583820  |
| 85 | 424;427;762     | 1      | -2     | 1.9 | 0   | 0    | 0    | 0    | 0    | 0        | 0       | 0       | 0       | 0       | 0       | 0       |
| 86 | 137             | 0      | 6.4739 | 0   | 0   | 0    | 0    | 0    | 15.3 | 88790    | 0       | 0       | 0       | 0       | 0       | 88790   |
| 87 | 113             | 0.0236 | 2.1031 | 0   | 0   | 0    | 13.3 | 0    | 0    | 50349    | 0       | 0       | 0       | 50349   | 0       | 0       |
| 88 | 1477            | 0.0298 | 1.5941 | 0.8 | 0   | 0    | 0    | 0    | 0    | 1439600  | 1439600 | 0       | 0       | 0       | 0       | 0       |
| 89 | 401;419         | 0      | 15.286 | 4   | 9.2 | 14   | 16.2 | 16.7 | 8.7  | 14136000 | 956630  | 1365600 | 4126400 | 3583100 | 2822200 | 1282000 |
| 90 | 420;458;437;437 | 1      | -2     | 4.8 | 8.1 | 2.6  | 7.6  | 2.6  | 7.6  | 66692    | 0       | 0       | 0       | 66692   | 0       | 0       |

|    | AJ              | AK | AL     | AM   | AN   | AO   | AP   | AQ   | AR   | AS        | AT        | AU        | AV     | AW       | AX       | AY       |
|----|-----------------|----|--------|------|------|------|------|------|------|-----------|-----------|-----------|--------|----------|----------|----------|
| 91 | 486;493;493;505 | 1  | -2     | 0    | 0    | 1.4  | 4.3  | 0    | 0    | 0         | 0         | 0         | 0      | 0        | 0        | 0        |
| 92 | 123             | 0  | 85.253 | 0    | 33.3 | 0    | 39.8 | 11.4 | 39.8 | 1911200   | 0         | 545660    | 0      | 503460   | 0        | 862070   |
| 93 | 231             | 0  | 318.38 | 37.7 | 41.1 | 49.4 | 39.4 | 43.7 | 35.9 | 521070000 | 176520000 | 114640000 | 0      | 99477000 | 98689000 | 31744000 |
| 94 | 472;452;452;93  | 0  | 73.746 | 6.1  | 43   | 4.2  | 11   | 13.1 | 32   | 11821000  | 976120    | 6831700   | 193410 | 636090   | 458600   | 2725300  |

|    | AJ              | AK | AL     | AM   | AN   | AO   | AP   | AQ   | AR   | AS        | AT      | AU       | AV      | AW       | AX      | AY       |
|----|-----------------|----|--------|------|------|------|------|------|------|-----------|---------|----------|---------|----------|---------|----------|
| 95 | 564;564;551;552 | 0  | 77.952 | 15.1 | 28.7 | 14.9 | 20.2 | 18.8 | 29.3 | 8343900   | 1136200 | 2704100  | 740220  | 626800   | 1222300 | 1914200  |
| 96 | 112;140;140     | 1  | -2     | 0    | 0    | 12.5 | 0    | 0    | 0    | 0         | 0       | 0        | 0       | 0        | 0       | 0        |
| 97 | 199             | 0  | 75.68  | 18.6 | 28.1 | 20.6 | 33.7 | 33.7 | 35.7 | 126060000 | 2785100 | 42084000 | 3816100 | 37395000 | 8223100 | 31757000 |
| 98 | 207             | 0  | 28.042 | 5.3  | 32.9 | 9.2  | 19.8 | 9.2  | 29   | 20726000  | 164860  | 4804100  | 912680  | 7039200  | 1365700 | 6439600  |

|     | AJ  | AK | AL     | AM   | AN   | AO   | AP   | AQ   | AR   | AS       | AT      | AU       | AV      | AW       | AX      | AY       |
|-----|-----|----|--------|------|------|------|------|------|------|----------|---------|----------|---------|----------|---------|----------|
| 99  | 209 | 0  | 16.431 | 9.1  | 9.1  | 9.1  | 9.1  | 9.1  | 9.1  | 24702000 | 718740  | 8389500  | 1545800 | 8302400  | 1963100 | 3782800  |
| 100 | 169 | 0  | 22.592 | 0    | 40.2 | 12.4 | 33.7 | 33.7 | 40.2 | 24382000 | 0       | 5352700  | 808960  | 7468200  | 2606800 | 8145300  |
| 101 | 162 | 0  | 117.09 | 27.8 | 57.4 | 21   | 56.8 | 43.8 | 51.9 | 66517000 | 1050000 | 28057000 | 713550  | 15547000 | 2031900 | 19117000 |

|     | AJ          | AK | AL     | AM   | AN   | AO   | AP   | AQ   | AR   | AS        | AT       | AU       | AV        | AW       | AX       | AY       |
|-----|-------------|----|--------|------|------|------|------|------|------|-----------|----------|----------|-----------|----------|----------|----------|
| 102 | 607;609;608 | 0  | 323.31 | 66.9 | 64.1 | 72   | 59.6 | 67.2 | 62.9 | 419440000 | 72092000 | 41194000 | 111540000 | 53484000 | 94252000 | 46880000 |
| 103 | 564         | 1  | -2     | 15.1 | 25.7 | 14.9 | 20.2 | 18.8 | 27.5 | 66585     | 0        | 0        | 0         | 0        | 0        | 66585    |

|     | AJ                                                                      | AK     | AL     | AM   | AN   | AO   | AP   | AQ   | AR   | AS        | AT       | AU       | AV       | AW       | AX       | AY       |
|-----|-------------------------------------------------------------------------|--------|--------|------|------|------|------|------|------|-----------|----------|----------|----------|----------|----------|----------|
| 104 | 644;637;572;572;<br>99                                                  | 0      | 323.31 | 35.1 | 37.6 | 27.3 | 36.6 | 32.5 | 38.7 | 144240000 | 23832000 | 48008000 | 9564900  | 15871000 | 11959000 | 35003000 |
| 105 | 247                                                                     | 0.0354 | 1.3681 | 0    | 0    | 8.1  | 0    | 0    | 8.1  | 147750000 | 0        | 0        | 91390000 | 0        | 0        | 56358000 |
| 106 | 473;469;474;469;<br>456;456;452;400;<br>403;424;431;403;<br>431;295;294 | 0      | 39.862 | 22.2 | 42.7 | 4.2  | 6.6  | 12.5 | 25.4 | 5808300   | 944450   | 3574800  | 0        | 0        | 416200   | 872860   |





|     | AJ  | AK | AL     | AM | AN   | AO   | AP   | AQ | AR   | AS        | AT       | AU       | AV       | AW       | AX       | AY       |
|-----|-----|----|--------|----|------|------|------|----|------|-----------|----------|----------|----------|----------|----------|----------|
| 111 | 623 | 0  | 323.31 | 44 | 48.8 | 39.3 | 42.2 | 38 | 42.9 | 119260000 | 20900000 | 33901000 | 14394000 | 12290000 | 12719000 | 25059000 |

|     | AJ                           | AK     | AL     | AM   | AN   | AO   | AP   | AQ   | AR   | AS        | AT       | AU       | AV       | AW       | AX       | AY       |
|-----|------------------------------|--------|--------|------|------|------|------|------|------|-----------|----------|----------|----------|----------|----------|----------|
| 112 | 645;539;539;529;<br>540;1090 | 0      | 323.31 | 34.1 | 48.7 | 32.7 | 51.9 | 38.1 | 43.7 | 111660000 | 14336000 | 36074000 | 14716000 | 19847000 | 10861000 | 15820000 |
| 113 | 638;525;525;521;<br>521      | 0      | 8.5028 | 6    | 13.5 | 4.1  | 7.1  | 4.4  | 4.5  | 663490    | 0        | 663490   | 0        | 0        | 0        | 0        |
| 114 | 432;433;433                  | 0      | 142.88 | 6.9  | 21.8 | 2.1  | 4.6  | 4.6  | 9    | 176830    | 0        | 176830   | 0        | 0        | 0        | 0        |
| 115 | 234                          | 0      | 58.276 | 15.4 | 6.8  | 23.5 | 15.4 | 23.5 | 15   | 0         | 0        | 0        | 0        | 0        | 0        | 0        |
| 116 | 380                          | 0.0489 | 1.2542 | 0    | 0    | 0    | 0    | 0    | 3.4  | 0         | 0        | 0        | 0        | 0        | 0        | 0        |
| 117 | 760                          | 0.0455 | 1.1947 | 0    | 0    | 0    | 0    | 0    | 1.4  | 0         | 0        | 0        | 0        | 0        | 0        | 0        |
| 118 | 2391                         | 0      | 20.679 | 0    | 0.5  | 0    | 0.5  | 0    | 0.5  | 336900    | 0        | 139250   | 0        | 103310   | 0        | 94336    |
| 119 | 578                          | 0      | 22.148 | 2.1  | 3.8  | 3.8  | 2.1  | 3.8  | 3.8  | 0         | 0        | 0        | 0        | 0        | 0        | 0        |
| 120 | 2850                         | 0      | 3.3642 | 0    | 1.7  | 0    | 0    | 0    | 4.5  | 321640    | 0        | 89984    | 0        | 0        | 0        | 231660   |







|     | AJ                                            | AK     | AL     | AM | AN  | AO   | AP  | AQ   | AR   | AS     | AT | AU | AV    | AW    | AX    | AY    |
|-----|-----------------------------------------------|--------|--------|----|-----|------|-----|------|------|--------|----|----|-------|-------|-------|-------|
| 139 | 806;821;845                                   | 0      | 2.371  | 0  | 0   | 2.1  | 0   | 0    | 0    | 37848  | 0  | 0  | 37848 | 0     | 0     | 0     |
| 140 | 582;631;658                                   | 0.0229 | 2.012  | 0  | 0   | 2.6  | 0   | 0    | 0    | 37543  | 0  | 0  | 37543 | 0     | 0     | 0     |
| 141 | 120;144;162;187;<br>193;228;399;378;<br>68;72 | 0      | 4.7571 | 0  | 0   | 12.5 | 6.7 | 12.5 | 12.5 | 280680 | 0  | 0  | 97124 | 60072 | 54127 | 69356 |
| 142 | 857;856                                       | 0.0343 | 1.3493 | 0  | 1.1 | 0    | 0   | 0    | 0    | 0      | 0  | 0  | 0     | 0     | 0     | 0     |
| 143 | 986;840                                       | 0.0226 | 1.9873 | 0  | 0   | 0.9  | 0   | 0    | 0.9  | 0      | 0  | 0  | 0     | 0     | 0     | 0     |









|     | AJ                          | AK     | AL     | AM | AN | AO  | AP  | AQ   | AR  | AS      | AT | AU | AV     | AW     | AX     | AY     |
|-----|-----------------------------|--------|--------|----|----|-----|-----|------|-----|---------|----|----|--------|--------|--------|--------|
| 161 | 458                         | 1      | -2     | 0  | 0  | 2   | 0   | 0    | 0   | 0       | 0  | 0  | 0      | 0      | 0      | 0      |
| 162 | 783                         | 1      | -2     | 0  | 0  | 0   | 0   | 2.3  | 0   | 0       | 0  | 0  | 0      | 0      | 0      | 0      |
| 163 | 117                         | 0.0463 | 1.289  | 0  | 0  | 0   | 0   | 11.1 | 0   | 0       | 0  | 0  | 0      | 0      | 0      | 0      |
| 164 | 780                         | 0.0458 | 1.2069 | 0  | 0  | 0   | 2.4 | 0    | 0   | 0       | 0  | 0  | 0      | 0      | 0      | 0      |
| 165 | 521                         | 0      | 4.2675 | 0  | 0  | 4.8 | 0   | 0    | 0   | 0       | 0  | 0  | 0      | 0      | 0      | 0      |
| 166 | 916;923;943;913;<br>942;937 | 0      | 4.8331 | 0  | 0  | 3.6 | 3.6 | 2.3  | 0   | 136420  | 0  | 0  | 61539  | 32377  | 42503  | 0      |
| 167 | 606                         | 0      | 3.0922 | 0  | 0  | 2.6 | 2.6 | 2.6  | 1.3 | 770690  | 0  | 0  | 307370 | 153160 | 274580 | 35571  |
| 168 | 461                         | 0      | 4.0542 | 0  | 0  | 6.3 | 6.3 | 6.3  | 6.3 | 1505200 | 0  | 0  | 578990 | 276970 | 410020 | 239240 |

|     | AJ      | AK | AL     | AM   | AN   | AO   | AP   | AQ   | AR   | AS        | AT       | AU       | AV      | AW      | AX      | AY      |
|-----|---------|----|--------|------|------|------|------|------|------|-----------|----------|----------|---------|---------|---------|---------|
| 169 | 107     | 0  | 148.84 | 30.8 | 48.6 | 30.8 | 69.2 | 69.2 | 36.4 | 37923000  | 7327200  | 14874000 | 8681200 | 1667000 | 3897900 | 1475400 |
| 170 | 324;393 | 0  | 36.045 | 41.4 | 42.9 | 0    | 3.7  | 0    | 0    | 141270000 | 87702000 | 53571000 | 0       | 0       | 0       | 0       |

|     | AJ                                                    | AK | AL     | AM | AN  | AO   | AP   | AQ   | AR   | AS       | AT | AU     | AV      | AW      | AX      | AY      |
|-----|-------------------------------------------------------|----|--------|----|-----|------|------|------|------|----------|----|--------|---------|---------|---------|---------|
| 171 | 451;449;451;267;<br>477;448;450;449;<br>100;125;81;89 | 0  | 105.6  | 0  | 3.1 | 14.6 | 24.2 | 22   | 20.2 | 11221000 | 0  | 98588  | 2739300 | 2265200 | 5022100 | 1095400 |
| 172 | 802;373                                               | 0  | 4.1634 | 0  | 0   | 1.5  | 1.7  | 1.5  | 8.6  | 475000   | 0  | 0      | 0       | 201490  | 0       | 273510  |
| 173 | 417;255;417                                           | 0  | 14.642 | 0  | 0   | 3.6  | 12   | 8.2  | 12.2 | 1415300  | 0  | 0      | 177220  | 410960  | 577630  | 249450  |
| 174 | 425;404                                               | 0  | 2.3706 | 0  | 0   | 0    | 0    | 0    | 4    | 69302    | 0  | 0      | 0       | 0       | 0       | 69302   |
| 175 | 462;186;249;463                                       | 0  | 12.768 | 0  | 2.4 | 7.6  | 5    | 12.1 | 7.6  | 3336900  | 0  | 156220 | 955640  | 473290  | 1367100 | 384650  |

|     | AJ                                                              | AK | AL     | AM   | AN   | AO  | AP  | AQ  | AR   | AS      | AT     | AU      | AV      | AW     | AX      | AY     |
|-----|-----------------------------------------------------------------|----|--------|------|------|-----|-----|-----|------|---------|--------|---------|---------|--------|---------|--------|
| 176 | 339                                                             | 0  | 119.29 | 0    | 5.3  | 9.1 | 9.1 | 9.1 | 9.1  | 0       | 0      | 0       | 0       | 0      | 0       | 0      |
| 177 | 362;406;407;312;<br>322                                         | 0  | 4.3593 | 0    | 0    | 0   | 7.5 | 5.2 | 0    | 323870  | 0      | 0       | 0       | 195910 | 127960  | 0      |
| 178 | 134;126;126;126;<br>126;126;126;126;<br>126;126;126;126;<br>127 | 0  | 4.3856 | 11.2 | 17.9 | 0   | 6.7 | 0   | 17.9 | 2274700 | 135580 | 1119200 | 0       | 145730 | 0       | 874170 |
| 179 | 1281                                                            | 1  | -2     | 0    | 1    | 0   | 0   | 0   | 0    | 0       | 0      | 0       | 0       | 0      | 0       | 0      |
| 180 | 724;733;189;201;<br>76;112;161                                  | 0  | 21.729 | 0    | 0    | 8.6 | 5.1 | 8.7 | 5.4  | 6132500 | 0      | 0       | 2977300 | 686820 | 1915800 | 552630 |

|     | AJ                          | AK     | AL     | AM  | AN  | AO   | AP  | AQ  | AR  | AS     | AT    | AU     | AV     | AW     | AX     | AY     |
|-----|-----------------------------|--------|--------|-----|-----|------|-----|-----|-----|--------|-------|--------|--------|--------|--------|--------|
| 181 | 367;367;234                 | 0      | 2.6006 | 0   | 0   | 12.3 | 0   | 5.7 | 5.7 | 682810 | 0     | 0      | 610850 | 0      | 33014  | 38940  |
| 182 | 253                         | 0      | 3.7515 | 4.7 | 0   | 4.7  | 4.7 | 4.7 | 4.7 | 899510 | 72107 | 0      | 272260 | 239080 | 140470 | 175590 |
| 183 | 212;219;221;209;<br>208;213 | 0      | 2.939  | 0   | 9.4 | 0    | 0   | 0   | 0   | 467410 | 0     | 467410 | 0      | 0      | 0      | 0      |
| 184 | 471                         | 1      | -2     | 0   | 0   | 0    | 0   | 2.5 | 0   | 0      | 0     | 0      | 0      | 0      | 0      | 0      |
| 185 | 164;40;77;77;147<br>;156    | 0      | 8.2275 | 0   | 0   | 22   | 0   | 5.5 | 0   | 935490 | 0     | 0      | 771230 | 0      | 164270 | 0      |
| 186 | 482                         | 0.0307 | 1.6364 | 0   | 0   | 0    | 0   | 0   | 3.3 | 0      | 0     | 0      | 0      | 0      | 0      | 0      |
| 187 | 655                         | 0      | 5.6555 | 0   | 0   | 4.7  | 1.8 | 4   | 0   | 669770 | 0     | 0      | 393580 | 39123  | 237060 | 0      |

|     | AJ                                  | AK     | AL     | AM | AN   | AO   | AP   | AQ   | AR   | AS        | AT | AU      | AV       | AW       | AX       | AY       |
|-----|-------------------------------------|--------|--------|----|------|------|------|------|------|-----------|----|---------|----------|----------|----------|----------|
| 188 | 466;427;134;475;<br>506;507;469;475 | 0      | 37.909 | 0  | 23.4 | 6    | 3.6  | 0    | 24.5 | 3728000   | 0  | 1954900 | 309650   | 125440   | 0        | 1338100  |
| 189 | 1344                                | 0.0306 | 1.3833 | 0  | 0    | 1.1  | 0    | 0    | 0    | 151520    | 0  | 0       | 151520   | 0        | 0        | 0        |
| 190 | 289;289;136;250                     | 0      | 7.8603 | 0  | 0    | 4.8  | 8.3  | 8.3  | 16.6 | 1581900   | 0  | 0       | 282600   | 338810   | 409600   | 550850   |
| 191 | 404                                 | 0      | 235.05 | 0  | 0    | 30.7 | 30.7 | 32.9 | 30   | 132020000 | 0  | 0       | 39260000 | 33528000 | 30424000 | 28803000 |

|     | AJ              | AK     | AL     | AM | AN  | AO   | AP  | AQ  | AR  | AS     | AT | AU | AV     | AW    | AX     | AY     |
|-----|-----------------|--------|--------|----|-----|------|-----|-----|-----|--------|----|----|--------|-------|--------|--------|
| 192 | 536;512         | 0.0311 | 1.6535 | 0  | 2.2 | 0    | 0   | 0   | 0   | 0      | 0  | 0  | 0      | 0     | 0      | 0      |
| 193 | 602;589;247;335 | 0      | 51.081 | 5  | 5   | 7.1  | 7.1 | 7.1 | 7.1 | 0      | 0  | 0  | 0      | 0     | 0      | 0      |
| 194 | 595             | 0      | 2.6523 | 0  | 0   | 3.5  | 3.5 | 3.5 | 0   | 229110 | 0  | 0  | 89403  | 41182 | 98525  | 0      |
| 195 | 764             | 0.0476 | 1.2272 | 0  | 0   | 1.8  | 0   | 0   | 0   | 0      | 0  | 0  | 0      | 0     | 0      | 0      |
| 196 | 105             | 0.045  | 1.2629 | 0  | 0   | 15.2 | 0   | 0   | 0   | 241070 | 0  | 0  | 241070 | 0     | 0      | 0      |
| 197 | 354             | 1      | -2     | 0  | 0   | 0    | 0   | 0   | 4.5 | 0      | 0  | 0  | 0      | 0     | 0      | 0      |
| 198 | 298;298;320     | 0.024  | 2.1773 | 0  | 0   | 3.4  | 0   | 4   | 4   | 590830 | 0  | 0  | 72917  | 0     | 289380 | 228530 |



|     | AJ                                                 | AK     | AL     | AM | AN  | AO   | AP   | AQ   | AR   | AS       | AT | AU     | AV       | AW      | AX      | AY      |
|-----|----------------------------------------------------|--------|--------|----|-----|------|------|------|------|----------|----|--------|----------|---------|---------|---------|
| 199 | 531;232;187;176;<br>184;155;102;51;5<br>43;574;574 | 0      | 323.31 | 0  | 7.2 | 36.7 | 30.9 | 34.3 | 33.3 | 29726000 | 0  | 179020 | 10226000 | 6196100 | 9176900 | 3947200 |
| 200 | 1358                                               | 0.0238 | 2.1265 | 0  | 1.3 | 0    | 0    | 0    | 0    | 0        | 0  | 0      | 0        | 0       | 0       | 0       |
| 201 | 529                                                | 0.0292 | 1.9065 | 0  | 0   | 0    | 3    | 3    | 0    | 267660   | 0  | 0      | 0        | 64349   | 203310  | 0       |
| 202 | 858                                                | 0      | 6.6849 | 0  | 0   | 3.6  | 1.5  | 3.7  | 2.7  | 836580   | 0  | 0      | 399730   | 64098   | 253500  | 119260  |
| 203 | 315;539                                            | 1      | -2     | 0  | 0   | 4.1  | 0    | 0    | 0    | 95337    | 0  | 0      | 95337    | 0       | 0       | 0       |

|     | AJ                                  | AK     | AL     | AM   | AN   | AO   | AP   | AQ   | AR   | AS        | AT      | AU      | AV       | AW       | AX       | AY       |
|-----|-------------------------------------|--------|--------|------|------|------|------|------|------|-----------|---------|---------|----------|----------|----------|----------|
| 204 | 375;265;295;268;<br>108;105;195;156 | 0      | 180.53 | 7.2  | 25.6 | 45.9 | 41.3 | 47.7 | 41.9 | 133200000 | 1289700 | 2416700 | 50618000 | 21536000 | 43836000 | 13501000 |
| 205 | 394                                 | 0      | 6.5132 | 0    | 0    | 4.8  | 3    | 10.9 | 0    | 270100    | 0       | 0       | 0        | 105860   | 164240   | 0        |
| 206 | 103                                 | 0      | 17.622 | 29.1 | 29.1 | 0    | 7.8  | 0    | 29.1 | 3288500   | 507730  | 1362800 | 0        | 185510   | 0        | 1232400  |
| 207 | 257                                 | 0.0376 | 1.3134 | 0    | 0    | 0    | 0    | 0    | 4.3  | 67416     | 0       | 0       | 0        | 0        | 0        | 67416    |
| 208 | 627;646;116;641;<br>642;633;641     | 0      | 6.0312 | 0    | 0    | 9.9  | 0    | 0    | 3.8  | 621170    | 0       | 0       | 491690   | 0        | 0        | 129470   |

|     | AJ                              | AK    | AL     | AM  | AN   | AO   | AP   | AQ   | AR   | AS       | AT | AU | AV       | AW     | AX      | AY     |
|-----|---------------------------------|-------|--------|-----|------|------|------|------|------|----------|----|----|----------|--------|---------|--------|
| 209 | 375;132;150;153;<br>43          | 0     | 2.7717 | 7.2 | 25.6 | 41.3 | 41.3 | 47.7 | 37.3 | 0        | 0  | 0  | 0        | 0      | 0       | 0      |
| 210 | 377;377;376;377;<br>151;195;221 | 0     | 2.7091 | 2.4 | 12.7 | 24.4 | 19.9 | 22.8 | 20.7 | 17350000 | 0  | 0  | 10043000 | 525700 | 6780900 | 0      |
| 211 | 445;444;447;536;<br>451;66      | 0     | 2.3194 | 0   | 5.8  | 22.7 | 20.9 | 22.9 | 21.6 | 272480   | 0  | 0  | 0        | 155310 | 117170  | 0      |
| 212 | 531                             | 0.048 | 1.2305 | 0   | 0    | 0    | 0    | 4    | 4    | 203830   | 0  | 0  | 0        | 0      | 89009   | 114820 |





|     | AJ            | AK     | AL     | AM  | AN  | AO   | AP   | AQ  | AR   | AS      | AT     | AU      | AV      | AW      | AX      | AY      |
|-----|---------------|--------|--------|-----|-----|------|------|-----|------|---------|--------|---------|---------|---------|---------|---------|
| 230 | 594           | 0      | 5.5405 | 4.9 | 4.7 | 5.9  | 6.1  | 4.7 | 4.9  | 8696100 | 776390 | 3048300 | 1116500 | 1355600 | 925490  | 1473900 |
| 231 | 602           | 0      | 2.3467 | 0   | 1.5 | 0    | 0    | 0   | 0    | 0       | 0      | 0       | 0       | 0       | 0       | 0       |
| 232 | 1013          | 1      | -2     | 1.2 | 0   | 0    | 0    | 0   | 0    | 0       | 0      | 0       | 0       | 0       | 0       | 0       |
| 233 | 102           | 0      | 2.345  | 0   | 0   | 10.8 | 10.8 | 0   | 10.8 | 0       | 0      | 0       | 0       | 0       | 0       | 0       |
| 234 | 1017          | 0.0291 | 1.558  | 0   | 0   | 0    | 1.4  | 0   | 0    | 0       | 0      | 0       | 0       | 0       | 0       | 0       |
| 235 | 2038          | 0.0289 | 1.555  | 0   | 0.5 | 0    | 0    | 0   | 0    | 502240  | 0      | 502240  | 0       | 0       | 0       | 0       |
| 236 | 1679;1675;216 | 0      | 64.165 | 1   | 0   | 11.1 | 4.8  | 6   | 6.1  | 6224100 | 20799  | 0       | 3362100 | 709980  | 1261900 | 869350  |
| 237 | 627           | 0      | 11.224 | 4   | 4   | 5.9  | 4    | 0   | 4    | 928750  | 74476  | 17902   | 621930  | 152230  | 0       | 62210   |
| 238 | 445;104;318   | 0      | 2.7222 | 0   | 0   | 4.3  | 0    | 2.5 | 0    | 117340  | 0      | 0       | 34201   | 0       | 83136   | 0       |



|     | AJ          | AK     | AL     | AM  | AN  | AO  | AP  | AQ  | AR  | AS      | AT      | AU      | AV      | AW     | AX     | AY    |
|-----|-------------|--------|--------|-----|-----|-----|-----|-----|-----|---------|---------|---------|---------|--------|--------|-------|
| 249 | 1394        | 0.0267 | 1.7325 | 0   | 0   | 0   | 0   | 0.6 | 0   | 0       | 0       | 0       | 0       | 0      | 0      | 0     |
| 250 | 1230        | 0.0224 | 1.9672 | 0   | 0   | 1.1 | 1.1 | 0   | 0   | 30062   | 0       | 0       | 0       | 30062  | 0      | 0     |
| 251 | 1759        | 0.0461 | 1.2883 | 0.6 | 0   | 0   | 0   | 0   | 0   | 0       | 0       | 0       | 0       | 0      | 0      | 0     |
| 252 | 1426;1037   | 0      | 3.6638 | 0.8 | 0   | 1.3 | 0   | 1.3 | 0   | 0       | 0       | 0       | 0       | 0      | 0      | 0     |
| 253 | 246         | 0      | 3.5606 | 4.1 | 4.1 | 4.1 | 0   | 0   | 0   | 5714900 | 1349700 | 1194400 | 3170800 | 0      | 0      | 0     |
| 254 | 204         | 0.0348 | 1.3593 | 0   | 0   | 0   | 0   | 6.9 | 0   | 0       | 0       | 0       | 0       | 0      | 0      | 0     |
| 255 | 2602        | 1      | -2     | 0.7 | 0   | 0   | 0   | 0   | 0   | 0       | 0       | 0       | 0       | 0      | 0      | 0     |
| 256 | 200         | 1      | -2     | 0   | 0   | 10  | 0   | 10  | 0   | 0       | 0       | 0       | 0       | 0      | 0      | 0     |
| 257 | 452;118;116 | 0      | 10.097 | 0   | 0   | 8.8 | 2.7 | 6.6 | 2.2 | 1489400 | 0       | 0       | 1036100 | 107180 | 290610 | 55500 |





|     | AJ      | AK     | AL     | AM  | AN  | AO  | AP | AQ  | AR  | AS     | AT | AU | AV     | AW | AX     | AY |
|-----|---------|--------|--------|-----|-----|-----|----|-----|-----|--------|----|----|--------|----|--------|----|
| 266 | 401     | 0.0286 | 1.8763 | 0   | 5   | 0   | 0  | 0   | 0   | 0      | 0  | 0  | 0      | 0  | 0      | 0  |
| 267 | 533     | 1      | -2     | 0   | 0   | 0   | 0  | 0   | 2.4 | 0      | 0  | 0  | 0      | 0  | 0      | 0  |
| 268 | 526;574 | 1      | -2     | 3   | 0   | 0   | 0  | 0   | 0   | 0      | 0  | 0  | 0      | 0  | 0      | 0  |
| 269 | 258     | 0.0337 | 1.4985 | 0   | 0   | 5.4 | 0  | 0   | 0   | 0      | 0  | 0  | 0      | 0  | 0      | 0  |
| 270 | 1042    | 0.0321 | 1.4281 | 0   | 1.2 | 0   | 0  | 0   | 0   | 0      | 0  | 0  | 0      | 0  | 0      | 0  |
| 271 | 495     | 0      | 2.2862 | 2.2 | 0   | 2.2 | 0  | 2.2 | 0   | 0      | 0  | 0  | 0      | 0  | 0      | 0  |
| 272 | 733     | 1      | -2     | 0   | 1.8 | 0   | 0  | 0   | 0   | 0      | 0  | 0  | 0      | 0  | 0      | 0  |
| 273 | 628     | 0.0494 | 1.1896 | 0   | 2.2 | 0   | 0  | 0   | 2.2 | 0      | 0  | 0  | 0      | 0  | 0      | 0  |
| 274 | 731     | 1      | -2     | 0   | 1.4 | 0   | 0  | 0   | 0   | 0      | 0  | 0  | 0      | 0  | 0      | 0  |
| 275 | 362     | 0      | 4.869  | 0   | 0   | 3.9 | 0  | 3.9 | 0   | 419680 | 0  | 0  | 244290 | 0  | 175390 | 0  |



|     | AJ                             | AK     | AL     | AM  | AN | AO  | AP  | AQ  | AR  | AS      | AT | AU | AV      | AW     | AX     | AY     |
|-----|--------------------------------|--------|--------|-----|----|-----|-----|-----|-----|---------|----|----|---------|--------|--------|--------|
| 287 | 600                            | 0.0482 | 1.2446 | 0   | 0  | 0   | 0   | 0   | 1.7 | 0       | 0  | 0  | 0       | 0      | 0      | 0      |
| 288 | 749                            | 0.0316 | 1.6713 | 0   | 0  | 0   | 1.7 | 0   | 1.7 | 0       | 0  | 0  | 0       | 0      | 0      | 0      |
| 289 | 698                            | 0.047  | 1.2206 | 0   | 0  | 0   | 0   | 2.7 | 0   | 0       | 0  | 0  | 0       | 0      | 0      | 0      |
| 290 | 638                            | 0.0274 | 1.79   | 2.2 | 0  | 0   | 2.2 | 2.2 | 0   | 0       | 0  | 0  | 0       | 0      | 0      | 0      |
| 291 | 418;216;70;129;1<br>55;161;418 | 0      | 33.98  | 0   | 0  | 9.8 | 7.7 | 7.7 | 7.7 | 2824800 | 0  | 0  | 1167300 | 562120 | 640390 | 455030 |
| 292 | 431                            | 0.0459 | 1.2808 | 0   | 0  | 0   | 3.7 | 0   | 0   | 0       | 0  | 0  | 0       | 0      | 0      | 0      |
| 293 | 1089                           | 0.0284 | 1.8617 | 0   | 0  | 1.4 | 0   | 0   | 0   | 0       | 0  | 0  | 0       | 0      | 0      | 0      |
| 294 | 458                            | 0.0321 | 1.6791 | 0   | 0  | 0   | 0   | 2.2 | 0   | 0       | 0  | 0  | 0       | 0      | 0      | 0      |
| 295 | 386                            | 0      | 3.6423 | 0   | 0  | 0   | 3.4 | 0   | 0   | 32820   | 0  | 0  | 0       | 32820  | 0      | 0      |
| 296 | 204                            | 0.0294 | 1.5662 | 0   | 0  | 7.8 | 0   | 0   | 0   | 157200  | 0  | 0  | 157200  | 0      | 0      | 0      |

|     | AJ  | AK     | AL     | AM  | AN  | AO   | AP   | AQ   | AR  | AS      | AT | AU     | AV      | AW      | AX      | AY     |
|-----|-----|--------|--------|-----|-----|------|------|------|-----|---------|----|--------|---------|---------|---------|--------|
| 297 | 247 | 0      | 3.384  | 4.9 | 4.9 | 4.9  | 4.9  | 4.9  | 4.9 | 0       | 0  | 0      | 0       | 0       | 0       | 0      |
| 298 | 142 | 0.0222 | 1.9581 | 0   | 0   | 11.3 | 0    | 0    | 0   | 105630  | 0  | 0      | 105630  | 0       | 0       | 0      |
| 299 | 438 | 0.0474 | 1.2227 | 0   | 0   | 0    | 2.5  | 0    | 0   | 0       | 0  | 0      | 0       | 0       | 0       | 0      |
| 300 | 392 | 0      | 4.6237 | 0   | 0   | 0    | 0    | 0    | 4.3 | 0       | 0  | 0      | 0       | 0       | 0       | 0      |
| 301 | 151 | 0.0305 | 1.6316 | 0   | 7.3 | 7.3  | 0    | 0    | 0   | 737160  | 0  | 153550 | 583610  | 0       | 0       | 0      |
| 302 | 310 | 0.0331 | 1.4725 | 4.5 | 0   | 0    | 0    | 0    | 0   | 0       | 0  | 0      | 0       | 0       | 0       | 0      |
| 303 | 381 | 0.0311 | 1.389  | 0   | 0   | 6.3  | 0    | 0    | 0   | 31006   | 0  | 0      | 31006   | 0       | 0       | 0      |
| 304 | 667 | 0.0328 | 1.447  | 0   | 1.9 | 0    | 0    | 0    | 0   | 0       | 0  | 0      | 0       | 0       | 0       | 0      |
| 305 | 483 | 0      | 86.115 | 0   | 0   | 15.1 | 17.6 | 17.6 | 17  | 6173800 | 0  | 0      | 2057800 | 1609500 | 1550700 | 955740 |
| 306 | 361 | 0      | 4.2811 | 0   | 0   | 0    | 0    | 5.3  | 0   | 32415   | 0  | 0      | 0       | 0       | 32415   | 0      |

|     | AJ      | AK     | AL     | AM  | AN  | AO  | AP  | AQ  | AR   | AS      | AT | AU    | AV     | AW     | AX     | AY    |
|-----|---------|--------|--------|-----|-----|-----|-----|-----|------|---------|----|-------|--------|--------|--------|-------|
| 307 | 796     | 0      | 4.175  | 0   | 0   | 2   | 2.1 | 1.4 | 0    | 194240  | 0  | 0     | 117090 | 20609  | 56538  | 0     |
| 308 | 248     | 0.0457 | 1.2782 | 0   | 0   | 5.6 | 0   | 0   | 0    | 0       | 0  | 0     | 0      | 0      | 0      | 0     |
| 309 | 4644    | 0      | 6.3101 | 0   | 0   | 0.5 | 0.5 | 0.5 | 0.3  | 488520  | 0  | 0     | 183320 | 126480 | 148480 | 30245 |
| 310 | 85      | 1      | -2     | 0   | 0   | 0   | 0   | 0   | 14.1 | 0       | 0  | 0     | 0      | 0      | 0      | 0     |
| 311 | 1657    | 0      | 8.7965 | 0   | 0.8 | 3   | 0.7 | 0   | 1    | 1059500 | 0  | 54078 | 772330 | 140730 | 0      | 92386 |
| 312 | 1578    | 0.0446 | 1.26   | 0   | 0   | 1.3 | 0   | 0   | 0    | 0       | 0  | 0     | 0      | 0      | 0      | 0     |
| 313 | 549     | 0      | 3.15   | 2.2 | 0   | 0   | 0   | 0   | 0    | 0       | 0  | 0     | 0      | 0      | 0      | 0     |
| 314 | 246;246 | 0.0233 | 2.0354 | 0   | 0   | 0   | 0   | 0   | 8.1  | 87369   | 0  | 0     | 0      | 0      | 0      | 87369 |
| 315 | 381     | 0.029  | 1.8887 | 0   | 3.1 | 0   | 0   | 0   | 0    | 0       | 0  | 0     | 0      | 0      | 0      | 0     |
| 316 | 267     | 0.0482 | 1.1616 | 0   | 0   | 0   | 0   | 0   | 5.6  | 0       | 0  | 0     | 0      | 0      | 0      | 0     |
| 317 | 474     | 0      | 2.336  | 0   | 0   | 6.1 | 0   | 6.1 | 0    | 450200  | 0  | 0     | 275090 | 0      | 175110 | 0     |







|     | AJ                  | AK     | AL     | AM | AN | AO | AP | AQ | AR | AS      | AT      | AU    | AV | AW | AX | AY |
|-----|---------------------|--------|--------|----|----|----|----|----|----|---------|---------|-------|----|----|----|----|
| 331 | 426;426;666         | 1      | -2     | 0  | 0  | 0  | 0  | 0  | 0  | 0       | 0       | 0     | 0  | 0  | 0  | 0  |
| 332 | 271                 | 0.0082 | 2.249  | 0  | 0  | 0  | 0  | 0  | 0  | 0       | 0       | 0     | 0  | 0  | 0  | 0  |
| 333 | 1153;1153           | 0.0388 | 1.3444 | 0  | 0  | 0  | 0  | 0  | 0  | 81854   | 0       | 81854 | 0  | 0  | 0  | 0  |
| 334 | 774;898;1057;1068   | 1      | -2     | 0  | 0  | 0  | 0  | 0  | 0  | 0       | 0       | 0     | 0  | 0  | 0  | 0  |
| 335 | 1142;1239;1264;1281 | 0.0496 | 1.1897 | 0  | 0  | 0  | 0  | 0  | 0  | 1353100 | 1353100 | 0     | 0  | 0  | 0  | 0  |



|     | AJ        | AK     | AL     | AM | AN | AO | AP | AQ | AR | AS      | AT | AU    | AV     | AW     | AX      | AY |
|-----|-----------|--------|--------|----|----|----|----|----|----|---------|----|-------|--------|--------|---------|----|
| 342 | 676;817   | 1      | -2     | 0  | 0  | 0  | 0  | 0  | 0  | 0       | 0  | 0     | 0      | 0      | 0       | 0  |
| 343 | 2571;2571 | 1      | -2     | 0  | 0  | 0  | 0  | 0  | 0  | 0       | 0  | 0     | 0      | 0      | 0       | 0  |
| 344 | 266;663   | 0.0347 | 1.5521 | 0  | 0  | 0  | 0  | 0  | 0  | 126530  | 0  | 0     | 126530 | 0      | 0       | 0  |
| 345 | 1175      | 0.0421 | 1.3068 | 0  | 0  | 0  | 0  | 0  | 0  | 0       | 0  | 0     | 0      | 0      | 0       | 0  |
| 346 | 524;926   | 0.0465 | 1.293  | 0  | 0  | 0  | 0  | 0  | 0  | 1455600 | 0  | 0     | 0      | 0      | 1455600 | 0  |
| 347 | 1575      | 0.0491 | 1.2589 | 0  | 0  | 0  | 0  | 0  | 0  | 247350  | 0  | 0     | 0      | 247350 | 0       | 0  |
| 348 | 255       | 0.0294 | 1.9227 | 0  | 0  | 0  | 0  | 0  | 0  | 29267   | 0  | 29267 | 0      | 0      | 0       | 0  |



|   | AZ          | BA                      | BB      | BC                    | BD | BE                               | BF                                       | BG                                                  | BH                                                                              | BI                                                                                                                                                                                                                                                                                                                                                                                                                                                                                                                                                                                                                                             | BJ                           | BK                           |  |
|---|-------------|-------------------------|---------|-----------------------|----|----------------------------------|------------------------------------------|-----------------------------------------------------|---------------------------------------------------------------------------------|------------------------------------------------------------------------------------------------------------------------------------------------------------------------------------------------------------------------------------------------------------------------------------------------------------------------------------------------------------------------------------------------------------------------------------------------------------------------------------------------------------------------------------------------------------------------------------------------------------------------------------------------|------------------------------|------------------------------|--|
| 1 | MS/MS count | Only identified by site | Reverse | Potential contaminant | id | Peptide IDs                      | Peptide is razor                         | Mod. peptide IDs                                    | Evidence IDs                                                                    | MS/MS IDs                                                                                                                                                                                                                                                                                                                                                                                                                                                                                                                                                                                                                                      | Best MS/MS                   | Carbamidomethyl (C) site IDs |  |
| 2 | 69          |                         |         |                       | 0  | 487                              | TRUE                                     | 525;526;527                                         | 1831;1832;1833;1834;1835;1836;1837;1838;1839;1840;1841;1842;1843;1844;1845;1846 | 6166;6167;6168;6169;6170;6171;6172;6173;6174;6175;6176;6177;6178;6179;6180;6181;6182;6183;6184;6185;6186;6187;6188;6189;6190;6191;6192;6193;6194;6195;6196;6197;6198;6199;6200;6201;6202;6203;6204;6205;6206;6207;6208;6209;6210;6211;6212;6213;6214;6215;6216;6217;6218;6219;6220;6221;6222;6223;6224;6225;6226;6227;6228;6229;6230;6231;6232;6233;6234                                                                                                                                                                                                                                                                                       |                              | 6219                         |  |
| 3 | 6           |                         |         |                       | 1  | 537;538                          | True;True                                | 585;586;587                                         | 2049;2050;2051;2052;2053;2054                                                   | 6937;6938;6939;6940;6941;6942;6943;6944;6945;6946;6947;6948;6949;6950;6951;6952;6953;6954;6955;6956;6957;6958;6959;6960;6961;6962                                                                                                                                                                                                                                                                                                                                                                                                                                                                                                              | 6938;6956                    |                              |  |
| 4 | 1           |                         |         |                       | 2  | 539                              | TRUE                                     | 588                                                 | 2055                                                                            |                                                                                                                                                                                                                                                                                                                                                                                                                                                                                                                                                                                                                                                | 6963                         | 6963                         |  |
| 5 | 6           |                         |         |                       | 3  | 41;42;90;130;532;541;680;767;780 | False;False;False;False;True;False;False | 43;44;45;97;144;581;590;741;742;743;744;840;841;857 | 467;2468;2469;2470;2471;2747;2748;2749;2750;2751;2752;2793;2794                 | 367;368;369;370;371;372;373;374;375;376;377;378;379;380;381;382;383;384;385;386;387;388;389;390;391;392;965;1420;1421;1422;1423;1424;1425;1426;1427;1428;1429;1430;1431;1432;1433;1434;1435;6796;6797;6798;6799;6800;6801;6967;6968;6969;6970;6971;6972;6973;8017;8018;8019;8020;8021;8022;8023;8024;8025;8026;8027;8028;8029;8030;8031;8032;8033;8034;8035;8036;8037;8933;8934;8935;8936;8937;8938;8939;8940;8941;8942;8943;8944;8945;8946;8947;8948;8949;8950;8951;8952;8953;8954;8955;8956;8957;8958;8959;8960;8961;9081;9082;9083;9084;9085;9086;9087;9088;9089;9090;9091;9092;9093;9094;9095;9096;9097;9098;9099;9100;9101;9102;9103;9104 | 379;391;965;1421;6800;6970;8 | 0;1;2;3;4                    |  |

|   | AZ  | BA | BB | BC | BD | BE              | BF                  | BG                  | BH                                                        | BI                                                                                   | BJ                  | BK   |
|---|-----|----|----|----|----|-----------------|---------------------|---------------------|-----------------------------------------------------------|--------------------------------------------------------------------------------------|---------------------|------|
| 6 | 0 + |    |    |    | 4  | 274             | TRUE                | 297                 | 915                                                       |                                                                                      | 2600                | 2600 |
| 7 | 0 + |    |    |    | 5  | 153             | TRUE                | 169                 | 540                                                       |                                                                                      | 1724                | 1724 |
| 8 | 7   |    |    |    | 6  | 228;459;461;773 | True;True;True;True | 250;496;498;848;849 | 782;783;1772;1773;1774;1775;1777;2769;2770;2771;2772;2773 | 2305;2306;2307;5978;5979;5980;5981;5983;9021;9022;9023;9024;9025;9026;9027;9028;9029 | 2306;5980;5983;9021 | 5    |
| 9 | 0   |    |    |    | 7  | 355             | TRUE                | 388                 | 1239                                                      |                                                                                      | 3562                | 3562 |

|    | AZ | BA | BB | BC | BD | BE          | BF             | BG          | BH                                  | BI                                               | BJ             | BK |
|----|----|----|----|----|----|-------------|----------------|-------------|-------------------------------------|--------------------------------------------------|----------------|----|
| 10 | 11 |    |    |    | 8  | 182;329;702 | True;True;True | 201;362;768 | 643;644;645;1175;2542;<br>2543;2544 | 1989;1990;1991;1992;1993;<br>8345;8346           | 1989;3418;8343 |    |
| 11 | 9  |    |    |    | 9  | 193;299     | True;True      | 213;325     | 677;1025;1026;1027                  | 2060;2923;2924;2925;2926;<br>2927;2928;2929;2930 | 2060;2930      |    |
| 12 | 0  |    |    |    | 10 | 544         | TRUE           | 593         | 2062;2063;2064                      | 6976;6977;6978;6979;6980                         | 6978           | 6  |





|    | AZ | BA | BB | BC | BD | BE                  | BF                      | BG              | BH                                         | BI                                                         | BJ                      | BK   |    |
|----|----|----|----|----|----|---------------------|-------------------------|-----------------|--------------------------------------------|------------------------------------------------------------|-------------------------|------|----|
| 16 | 0  |    |    |    | 14 | 662                 | TRUE                    | 722             | 2424                                       |                                                            | 7965                    | 7965 |    |
| 17 | 0  |    |    |    | 15 | 10                  | TRUE                    | 11              | 46                                         |                                                            | 142                     | 142  | 12 |
| 18 | 0  |    |    |    | 16 | 296                 | TRUE                    | 322             | 1021;1022                                  | 2919;2920                                                  |                         | 2919 | 13 |
| 19 | 10 |    |    |    | 17 | 280;415;694;<br>724 | True;True;True;Tr<br>ue | 303;451;758;793 | 927;1649;2506;2507;25<br>08;2509;2618;2619 | 2627;5701;8134;8135;8136;8137;8138;8139;8140;<br>8567;8568 | 2627;5701;8135<br>;8567 |      |    |

|    | AZ  | BA | BB | BC | BD | BE     | BF        | BG     | BH                                                          | BI                                                                                                                                                                                                                 | BJ                                                                                                                     | BK       |  |
|----|-----|----|----|----|----|--------|-----------|--------|-------------------------------------------------------------|--------------------------------------------------------------------------------------------------------------------------------------------------------------------------------------------------------------------|------------------------------------------------------------------------------------------------------------------------|----------|--|
| 20 | 0   |    |    |    | 18 | 494    | TRUE      | 535    | 1861                                                        | 6259                                                                                                                                                                                                               | 6259                                                                                                                   | 14       |  |
| 21 | 1   |    |    |    | 19 | 160    | TRUE      | 176    | 562                                                         | 1795                                                                                                                                                                                                               | 1795                                                                                                                   |          |  |
| 22 | 0 + |    |    |    | 20 | 56     | TRUE      | 61     | 193                                                         | 546                                                                                                                                                                                                                | 546                                                                                                                    |          |  |
| 23 | 45  |    |    |    | 21 | 23;782 | True;True | 25;859 | 91;92;93;94;95;2796;2797;2798;2799;2800;2801;2802;2803;2804 | 250;251;252;253;254;255;256;257;258;259;260;261;262;263;9107;9108;9109;9110;9111;9112;9113;9114;9115;9116;9117;9118;9119;9120;9121;9122;9123;9124;9125;9126;9127;9128;9129;9130;9131;9132;9133;9134;9135;9136;9137 | 114;9115;9116;9117;9118;9119;9120;9121;9122;9123;9124;9125;9126;9127;9128;9129;9130;9131;9132;9133;9134;9135;9136;9137 | 256;9115 |  |
| 24 | 0 + |    |    |    | 22 | 603    | TRUE      | 658    | 2245                                                        | 7474                                                                                                                                                                                                               | 7474                                                                                                                   | 15       |  |

|    | AZ  | BA | BB | BC | BD | BE  | BF   | BG                      | BH                  | BI   | BJ   | BK |
|----|-----|----|----|----|----|-----|------|-------------------------|---------------------|------|------|----|
| 25 | 0 + |    |    |    | 23 | 695 | TRUE | 759                     | 2510                | 8141 | 8141 |    |
| 26 | 0   |    |    |    | 24 | 226 | TRUE | 248 777;778             | 2300;2301           |      | 2301 |    |
| 27 | 0 + |    |    |    | 25 | 197 | TRUE | 217                     | 686                 | 2072 | 2072 |    |
| 28 | 4   |    |    |    | 26 | 445 | TRUE | 482 1739;1740;1741;1742 | 5918;5919;5920;5921 |      | 5921 |    |
| 29 | 1   |    |    |    | 27 | 345 | TRUE | 378                     | 1217                | 3502 | 3502 |    |

|    | AZ  | BA | BB | BC | BD | BE  | BF   | BG  | BH        | BI        | BJ   | BK    |
|----|-----|----|----|----|----|-----|------|-----|-----------|-----------|------|-------|
| 30 | 0   |    |    |    | 28 | 823 | TRUE | 906 | 2963      | 9595      | 9595 | 16;17 |
| 31 | 0   |    |    |    | 29 | 546 | TRUE | 595 | 2066;2067 | 6982;6983 | 6983 | 18    |
| 32 | 0 + |    |    |    | 30 | 117 | TRUE | 128 | 404;405   | 1224;1225 | 1225 |       |
| 33 | 0   |    |    |    | 31 | 543 | TRUE | 592 | 2061      | 6975      | 6975 |       |

|    | AZ  | BA | BB | BC | BD | BE      | BF        | BG      | BH                      | BI                       | BJ        | BK |
|----|-----|----|----|----|----|---------|-----------|---------|-------------------------|--------------------------|-----------|----|
| 34 | 0   |    |    |    | 32 | 301     | TRUE      | 327     | 1029;1030               | 2932;2933                | 2932      |    |
| 35 | 0 + |    |    |    | 33 | 552     | TRUE      | 601     | 2083                    | 7007                     | 7007      | 19 |
| 36 | 0 + |    |    |    | 34 | 519     | TRUE      | 563     | 1932                    | 6430                     | 6430      |    |
| 37 | 0 + |    |    |    | 35 | 288     | TRUE      | 311     | 952                     | 2680                     | 2680      | 20 |
| 38 | 5   |    |    |    | 36 | 116;428 | True;True | 127;465 | 403;1697;1698;1699;1700 | 1223;5808;5809;5810;5811 | 1223;5811 |    |

|    | AZ  | BA | BB | BC | BD | BE  | BF   | BG  | BH             | BI                  | BJ   | BK |
|----|-----|----|----|----|----|-----|------|-----|----------------|---------------------|------|----|
| 39 | 2   |    |    |    | 37 | 101 | TRUE | 110 | 357            | 1065;1066           | 1065 |    |
| 40 | 0 + |    |    |    | 38 | 466 | TRUE | 503 | 1796           | 6062                | 6062 |    |
| 41 | 0   |    |    |    | 39 | 614 | TRUE | 670 | 2268           | 7519                | 7519 |    |
| 42 | 1   |    |    |    | 40 | 542 | TRUE | 591 | 2060           | 6974                | 6974 |    |
| 43 | 0   |    |    |    | 41 | 554 | TRUE | 603 | 2085;2086;2087 | 7009;7010;7011;7012 | 7012 |    |

|    | AZ  | BA | BB | BC | BD | BE  | BF   | BG      | BH        | BI        | BJ   | BK         |    |
|----|-----|----|----|----|----|-----|------|---------|-----------|-----------|------|------------|----|
| 44 | 0 + |    |    |    | 42 | 357 | TRUE | 390     | 1241      |           | 3564 | 3564       |    |
| 45 | 0 + |    |    |    | 43 | 25  | TRUE | 27      | 98        |           | 267  | 267        |    |
| 46 | 0 + |    |    |    | 44 | 381 | TRUE | 415     | 1289      |           | 3641 | 3641       | 21 |
| 47 | 0 + |    |    |    | 45 | 604 | TRUE | 659;660 | 2246;2247 | 7475;7476 |      | 7476 22;23 |    |
| 48 | 2   |    |    |    | 46 | 455 | TRUE | 492     | 1760;1761 | 5965;5966 |      | 5966       |    |
| 49 | 0 + |    |    |    | 47 | 298 | TRUE | 324     | 1024      |           | 2922 | 2922       |    |

|    | AZ  | BA | BB | BC | BD | BE      | BF        | BG      | BH                  | BI                       | BJ        | BK   |    |
|----|-----|----|----|----|----|---------|-----------|---------|---------------------|--------------------------|-----------|------|----|
| 50 | 0   |    |    |    | 48 | 517     | TRUE      | 559     | 1917                |                          | 6403      | 6403 |    |
| 51 | 0 + |    |    |    | 49 | 222     | TRUE      | 244     | 768                 |                          | 2287      | 2287 |    |
| 52 | 5   |    |    |    | 50 | 313;693 | True;True | 340;757 | 1059;1060;1061;2505 | 2997;2998;2999;3000;8133 | 2998;8133 |      |    |
| 53 | 0 + |    |    |    | 51 | 534     | TRUE      | 582     | 2014                |                          | 6802      | 6802 |    |
| 54 | 0   |    |    |    | 52 | 486     | TRUE      | 524     | 1830                |                          | 6165      | 6165 | 24 |



|    | AZ  | BA | BB | BC | BD | BE  | BF   | BG  | BH   | BI | BJ   | BK         |
|----|-----|----|----|----|----|-----|------|-----|------|----|------|------------|
| 55 | 0 + |    |    |    | 53 | 102 | TRUE | 111 | 358  |    | 1067 | 1067 25    |
| 56 | 1   |    |    |    | 54 | 563 | TRUE | 613 | 2120 |    | 7080 | 7080       |
| 57 | 0   |    |    |    | 55 | 157 | TRUE | 173 | 550  |    | 1740 | 1740 26;27 |
| 58 | 0   |    |    |    | 56 | 79  | TRUE | 85  | 248  |    | 697  | 697 28;29  |

|    | AZ | BA | BB | BC | BD | BE      | BF        | BG      | BH        | BI        | BJ        | BK |
|----|----|----|----|----|----|---------|-----------|---------|-----------|-----------|-----------|----|
| 59 | 0  |    |    |    | 57 | 448     | TRUE      | 485     | 1745      | 5924      | 5924      | 30 |
| 60 | 0  |    |    |    | 58 | 529     | TRUE      | 573;574 | 1959;1960 | 6513;6514 | 6513      | 31 |
| 61 | 0  |    |    |    | 59 | 435     | TRUE      | 472     | 1710      | 5827;5828 | 5827      |    |
| 62 | 0  |    |    |    | 60 | 622     | TRUE      | 679     | 2294;2295 | 7585;7586 | 7585      |    |
| 63 | 2  |    |    |    | 61 | 503;809 | True;True | 545;890 | 1883;2903 | 6313;9379 | 6313;9379 |    |

|    | AZ  | BA | BB | BC | BD | BE      | BF        | BG      | BH        | BI        | BJ        | BK         |
|----|-----|----|----|----|----|---------|-----------|---------|-----------|-----------|-----------|------------|
| 64 | 0   |    |    |    | 62 | 564     | TRUE      | 614     | 2121      |           | 7081      | 7081       |
| 65 | 0   |    |    |    | 63 | 471     | TRUE      | 508     | 1802      |           | 6069      | 6069 32    |
| 66 | 0 + |    |    |    | 64 | 171     | TRUE      | 188     | 587       |           | 1842      | 1842       |
| 67 | 0   |    |    |    | 65 | 155     | TRUE      | 171     | 545       | 1729;1730 |           | 1730 33;34 |
| 68 | 1   |    |    |    | 66 | 523;597 | True;True | 567;652 | 1937;2216 | 6437;7377 | 6437;7377 | 35         |

|    | AZ | BA | BB | BC | BD | BE                 | BF                       | BG                      | BH                                 | BI                                           | BJ                       | BK   |
|----|----|----|----|----|----|--------------------|--------------------------|-------------------------|------------------------------------|----------------------------------------------|--------------------------|------|
| 69 | 3  |    |    |    | 67 | 3                  | TRUE                     |                         | 3 7;8;9                            | 7;8;9                                        | 9                        |      |
| 70 | 0  |    |    |    | 68 | 396                | TRUE                     | 430                     | 1344;1345                          | 3854;3855                                    | 3854                     |      |
| 71 | 0  |    |    |    | 69 | 784                | TRUE                     | 861;862;863             | 2807;2808;2809;2810;2811;2812;2813 | 9140;9141;9142;9143;9144;9145;9146;9147;9148 | 9143                     |      |
| 72 | 6  |    |    |    | 70 | 97;219;250;307;449 | True;True;True;True;True | 106;241;272;333;334;486 | 347;750;850;1043;1044;1746;1747    | 1045;2246;2435;2961;2962;5925;5926           | 1045;2246;2435;2961;5926 |      |
| 73 | 0  |    |    |    | 71 | 666                | TRUE                     | 726                     |                                    | 2438                                         | 7992                     | 7992 |
| 74 | 4  |    |    | +  | 72 | 433                | TRUE                     | 470                     | 1707                               | 5819;5820;5821;5822                          | 5819                     |      |

|    | AZ  | BA | BB | BC | BD | BE  | BF   | BG  | BH        | BI                  | BJ   | BK    |
|----|-----|----|----|----|----|-----|------|-----|-----------|---------------------|------|-------|
| 75 | 0   |    |    |    | 73 | 81  | TRUE | 88  | 251       | 700                 | 700  | 36;37 |
| 76 | 0   |    |    |    | 74 | 286 | TRUE | 309 | 948       | 2675                | 2675 |       |
| 77 | 0 + |    |    |    | 75 | 71  | TRUE | 77  | 239       | 687                 | 687  | 38    |
| 78 | 0   |    |    |    | 76 | 504 | TRUE | 546 | 1884      | 6314                | 6314 |       |
| 79 | 4   |    |    |    | 77 | 567 | TRUE | 617 | 2133;2134 | 7138;7139;7140;7141 | 7139 |       |
| 80 | 0   |    |    |    | 78 | 575 | TRUE | 627 | 2174      | 7290                | 7290 |       |
| 81 | 0   |    |    |    | 79 | 659 | TRUE | 719 | 2421      | 7962                | 7962 |       |

|    | AZ  | BA | BB | BC | BD | BE                          | BF                                     | BG                             | BH                                                                                                                | BI                                                                                                                                                                                                                 | BJ                                    | BK    |
|----|-----|----|----|----|----|-----------------------------|----------------------------------------|--------------------------------|-------------------------------------------------------------------------------------------------------------------|--------------------------------------------------------------------------------------------------------------------------------------------------------------------------------------------------------------------|---------------------------------------|-------|
| 82 | 4   |    |    |    | 80 | 202                         | TRUE                                   | 222                            | 700;701;702;703                                                                                                   | 2126;2127;2128;2129                                                                                                                                                                                                | 2128                                  |       |
| 83 | 0   |    |    |    | 81 | 814                         | TRUE                                   | 896                            | 2926                                                                                                              | 9487                                                                                                                                                                                                               | 9487                                  |       |
| 84 | 1   |    |    |    | 82 | 13                          | TRUE                                   | 14                             | 54                                                                                                                | 153                                                                                                                                                                                                                | 153                                   |       |
| 85 | 0 + |    |    |    | 83 | 650                         | TRUE                                   | 709                            | 2403                                                                                                              | 7931                                                                                                                                                                                                               | 7931                                  |       |
| 86 | 1   |    | +  |    | 84 | 34                          | TRUE                                   | 36                             | 120                                                                                                               | 331                                                                                                                                                                                                                | 331                                   |       |
| 87 | 1   |    | +  |    | 85 | 761                         | TRUE                                   | 833                            | 2730                                                                                                              | 8905                                                                                                                                                                                                               | 8905                                  |       |
| 88 | 1   |    | +  |    | 86 | 112                         | TRUE                                   | 123                            | 396                                                                                                               | 1213                                                                                                                                                                                                               | 1213                                  |       |
| 89 | 34  |    | +  |    | 87 | 176;330;498;<br>750;787;807 | True;True;True;Tr<br>ue;True;True      | 195;363;540;821;86<br>7;888    | 624;625;626;627;628;62<br>9;630;1176;1177;1876;1<br>877;1878;2699;2700;28<br>26;2827;2828;2896;289<br>7;2898;2899 | 1954;1955;1956;1957;1958;1959;1960;1961;1962;<br>1963;1964;1965;1966;1967;1968;3419;3420;6303;<br>6304;6305;6306;6307;8810;8811;8812;8813;8814;<br>9201;9202;9203;9204;9205;9357;9358;9359;9360;<br>9361;9362;9363 | 1968;3420;6306<br>;8813;9204;936<br>2 | 39;40 |
| 90 | 1 + |    | +  |    | 88 | 30;403;581;5<br>82;713;751  | False;False;False;F<br>alse;False;True | 32;437;633;634;635<br>;780;822 | 109;110;1361;1362;136<br>3;2187;2188;2189;2190;<br>2191;2192;2193;2583;2<br>584;2585;2701                         | 289;290;291;292;3886;3887;3888;7334;7335;7336<br>7337;7338;7339;7340;7341;7342;7343;7344;7345;<br>7346;7347;7348;7349;7350;8445;8446;8447;8448;<br>8449;8450;8451;8815                                             | 289;3886;7346;<br>7350;8449;8815      |       |

|    | AZ  | BA | BB | BC | BD | BE                 | BF                  | BG                                       | BH                                                                                                                                                                                                                                                                                                                                                                                                                                                                                                                                                                                                                                                                                                                              | BI                                                                                                                                                                                                                                                                                                                                                                                                                                                                                                                                                                                                                                                                                                                                                                                                                                                                                                                                                                                                                                                                                                                                                                                                                                                                                                                                                                                                                                      | BJ                                                 | BK                |
|----|-----|----|----|----|----|--------------------|---------------------|------------------------------------------|---------------------------------------------------------------------------------------------------------------------------------------------------------------------------------------------------------------------------------------------------------------------------------------------------------------------------------------------------------------------------------------------------------------------------------------------------------------------------------------------------------------------------------------------------------------------------------------------------------------------------------------------------------------------------------------------------------------------------------|-----------------------------------------------------------------------------------------------------------------------------------------------------------------------------------------------------------------------------------------------------------------------------------------------------------------------------------------------------------------------------------------------------------------------------------------------------------------------------------------------------------------------------------------------------------------------------------------------------------------------------------------------------------------------------------------------------------------------------------------------------------------------------------------------------------------------------------------------------------------------------------------------------------------------------------------------------------------------------------------------------------------------------------------------------------------------------------------------------------------------------------------------------------------------------------------------------------------------------------------------------------------------------------------------------------------------------------------------------------------------------------------------------------------------------------------|----------------------------------------------------|-------------------|
| 91 | 0 + |    |    | +  | 89 | 209;458            | False;True          | 230;495                                  | 725;726;1771                                                                                                                                                                                                                                                                                                                                                                                                                                                                                                                                                                                                                                                                                                                    | 2191;2192;5977                                                                                                                                                                                                                                                                                                                                                                                                                                                                                                                                                                                                                                                                                                                                                                                                                                                                                                                                                                                                                                                                                                                                                                                                                                                                                                                                                                                                                          | 2192;5977                                          | 41                |
| 92 | 9   |    |    | +  | 90 | 95;208;399;7<br>46 | True;True;True;True | 104;229;433;817                          | 343;344;345;721;722;723;<br>3;724;1351;1352;2690;2691;<br>691;2692;2693;2694                                                                                                                                                                                                                                                                                                                                                                                                                                                                                                                                                                                                                                                    | 1038;1039;1040;1041;1042;1043;2169;2170;2171;<br>2172;2173;2174;2175;2176;2177;2178;2179;2180;<br>2181;2182;2183;2184;2185;2186;2187;2188;2189;<br>2190;3870;3871;3872;8797;8798;8799;8800;8801;<br>8802;8803;8804;8805                                                                                                                                                                                                                                                                                                                                                                                                                                                                                                                                                                                                                                                                                                                                                                                                                                                                                                                                                                                                                                                                                                                                                                                                                 | 1039;2188;3871<br>;8803                            | 42;43;44;45       |
| 93 | 22  |    |    | +  | 91 | 29;731             | True;True;True;True | 52;342;343;344;345<br>;346;347;348;364;4 | 8;1069;1070;1071;1072;<br>1073;1074;1075;1076;1<br>077;1078;1079;1080;10<br>81;1082;1083;1084;108<br>5;1086;1087;1088;1089;<br>1090;1091;1092;1093;1<br>094;1095;1096;1097;10<br>98;1099;1100;1101;110<br>2;1103;1104;1105;1106;<br>1107;1108;1109;1110;1<br>111;1112;1113;1114;11<br>15;1116;1117;1118;111<br>9;1120;1121;1122;1123;<br>1124;1125;1126;1127;1<br>128;1129;1130;1131;11<br>32;1133;1134;1135;113<br>6;1137;1138;1139;1140;<br>1141;1142;1143;1144;1<br>145;1178;1381;1382;13<br>83;1384;1385;1386;138<br>7;1388;1389;1390;1391;<br>1392;1393;1394;1395;1<br>396;1397;1398;1399;14<br>00;1401;1402;1403;140<br>4;1405;1406;1407;1408;<br>1409;1410;1411;1412;1<br>413;1414;1415;1416;14<br>17;1418;1419;1420;142 | 15;3016;3017;3018;3019;3020;3021;3022;3023;30<br>24;3025;3026;3027;3028;3029;3030;3031;3032;30<br>33;3034;3035;3036;3037;3038;3039;3040;3041;30<br>42;3043;3044;3045;3046;3047;3048;3049;3050;30<br>51;3052;3053;3054;3055;3056;3057;3058;3059;30<br>60;3061;3062;3063;3064;3065;3066;3067;3068;30<br>69;3070;3071;3072;3073;3074;3075;3076;3077;30<br>78;3079;3080;3081;3082;3083;3084;3085;3086;30<br>87;3088;3089;3090;3091;3092;3093;3094;3095;30<br>96;3097;3098;3099;3100;3101;3102;3103;3104;31<br>05;3106;3107;3108;3109;3110;3111;3112;3113;31<br>14;3115;3116;3117;3118;3119;3120;3121;3122;31<br>23;3124;3125;3126;3127;3128;3129;3130;3131;31<br>32;3133;3134;3135;3136;3137;3138;3139;3140;31<br>41;3142;3143;3144;3145;3146;3147;3148;3149;31<br>50;3151;3152;3153;3154;3155;3156;3157;3158;31<br>59;3160;3161;3162;3163;3164;3165;3166;3167;31<br>68;3169;3170;3171;3172;3173;3174;3175;3176;31<br>77;3178;3179;3180;3181;3182;3183;3184;3185;31<br>86;3187;3188;3189;3190;3191;3192;3193;3194;31<br>95;3196;3197;3198;3199;3200;3201;3202;3203;32<br>04;3205;3206;3207;3208;3209;3210;3211;3212;32<br>13;3214;3215;3216;3217;3218;3219;3220;3221;32<br>22;3223;3224;3225;3226;3227;3228;3229;3230;32<br>31;3232;3233;3234;3235;3236;3237;3238;3239;32<br>40;3241;3242;3243;3244;3245;3246;3247;3248;32<br>49;3250;3251;3252;3253;3254;3255;3256;3257;32<br>58;3259;3260;3261;3262;3263;3264;3265;3266;32<br>8;8669;8705 | 506;3338;3354;<br>3422;5552;5968<br>;7506;7994;799 | 46;47;48;49;50;51 |
| 94 | 87  |    |    | +  | 92 | 3;797              | True;True;True;True | 80;824;860;878                           | 12;109;110;166;186;187<br>;188;189;190;191;237;2<br>38;664;665;870;871;872<br>;874;875;1164;1165;116<br>6;1167;1361;1362;1363;<br>1689;1690;1880;2291;2<br>292;2545;2583;2584;25<br>6310;7581;7582;8347;8445;8446;8447;8448;8449;<br>85;2707;2708;2709;271<br>0;2711;2712;2805;2806;<br>8829;8830;8831;8832;8833;8834;8835;8836;8837;<br>2856                                                                                                                                                                                                                                                                                                                                                                                   | 12;13;289;290;291;292;504;530;531;532;533;534;5<br>35;536;537;538;539;540;541;542;543;544;685;686<br>2020;2021;2470;2471;2472;2473;2474;2475;2476;<br>2478;2479;3391;3392;3393;3394;3395;3396;3397;<br>3398;3399;3400;3401;3402;3403;3404;3405;3406;<br>3407;3886;3887;3888;5793;5794;5795;5796;6309;<br>8450;8451;8822;8823;8824;8825;8826;8827;8828;<br>8829;8830;8831;8832;8833;8834;8835;8836;8837;<br>12;289;504;534;<br>685;2020;2471;<br>;5794;6310;758                                                                                                                                                                                                                                                                                                                                                                                                                                                                                                                                                                                                                                                                                                                                                                                                                                                                                                                                                                          | 28;9138;9266                                       | 52;53;54          |





|     | AZ  | BA | BB | BC | BD | BE                                          | BF                                      | BG                                      | BH                                                                                                                                                                                                                     | BI                                                                                                                                                                                                                                                                                                                                                                                                                                                                                                                                                                                                                                                                                                                                                                                                          | BJ                                             | BK    |
|-----|-----|----|----|----|----|---------------------------------------------|-----------------------------------------|-----------------------------------------|------------------------------------------------------------------------------------------------------------------------------------------------------------------------------------------------------------------------|-------------------------------------------------------------------------------------------------------------------------------------------------------------------------------------------------------------------------------------------------------------------------------------------------------------------------------------------------------------------------------------------------------------------------------------------------------------------------------------------------------------------------------------------------------------------------------------------------------------------------------------------------------------------------------------------------------------------------------------------------------------------------------------------------------------|------------------------------------------------|-------|
| 99  | 82  |    |    | +  | 97 | 111                                         | TRUE                                    | 121;122                                 | 5                                                                                                                                                                                                                      | 1131;1132;1133;1134;1135;1136;1137;1138;1139;<br>1140;1141;1142;1143;1144;1145;1146;1147;1148;<br>1149;1150;1151;1152;1153;1154;1155;1156;1157;<br>1158;1159;1160;1161;1162;1163;1164;1165;1166;<br>1167;1168;1169;1170;1171;1172;1173;1174;1175;<br>1176;1177;1178;1179;1180;1181;1182;1183;1184;<br>379;380;381;382;383;384;385;386;387;388;389;<br>1194;1195;1196;1197;1198;1199;1200;1201;1202;<br>390;391;392;393;394;395;1203;1204;1205;1206;1207;1208;1209;1210;1211;<br>1212                                                                                                                                                                                                                                                                                                                        | 1156                                           |       |
| 100 | 59  |    |    | +  | 98 | 550;612;656;<br>812;819;820                 | True;True;True;True;True;True           | 599;668;715;894;902;903                 | 2075;2076;2077;2078;2079;2263;2264;2265;2409;2410;2411;2412;2413;2414;2415;2915;2916;2917;2918;2919;2951;2952;2953;2954;2955                                                                                           | 6992;6993;6994;6995;6996;6997;6998;6999;7000;<br>7001;7513;7514;7515;7516;7938;7939;7940;7941;<br>7942;7943;7944;7945;7946;7947;7948;7949;7950;<br>7951;7952;7953;7954;9409;9410;9411;9412;9413;<br>9414;9415;9416;9417;9418;9419;9420;9421;9422;<br>9423;9424;9425;9426;9427;9428;9429;9430;9573;<br>9574;9575;9576;9577;9578;9579;9580;9581;9582                                                                                                                                                                                                                                                                                                                                                                                                                                                          | 6992;7513;7948<br>;9430;9575;9582              | 59    |
| 101 | 111 |    |    | +  | 99 | 419;454;711;<br>712;725;762;<br>763;788;790 | True;True;True;True;True;True;True;True | 455;491;778;779;794;795;834;835;868;870 | 1660;1754;1755;1756;1757;1758;1759;2573;2574;2575;2576;2577;2578;2579;2580;2581;2582;2620;2621;2622;2623;2624;2625;2626;2627;2628;2629;2731;2732;2733;2734;2735;2736;2829;2830;2831;2832;2833;2834;2835;2836;2837;2839 | 5739;5934;5935;5936;5937;5938;5939;5940;5941;<br>5942;5943;5944;5945;5946;5947;5948;5949;5950;<br>5951;5952;5953;5954;5955;5956;5957;5958;5959;<br>5960;5961;5962;5963;5964;8417;8418;8419;8420;<br>8421;8422;8423;8424;8425;8426;8427;8428;8429;<br>8430;8431;8432;8433;8434;8435;8436;8437;8438;<br>8439;8440;8441;8442;8443;8444;8569;8570;8571;<br>8572;8573;8574;8575;8576;8577;8578;8579;8580;<br>8581;8582;8583;8584;8585;8586;8587;8588;8589;<br>8590;8591;8592;8593;8594;8595;8596;8597;8598;<br>8599;8600;8601;8602;8603;8604;8605;8606;8607;<br>8906;8907;8908;8909;8910;8911;8912;8913;8914;<br>8915;8916;9206;9207;9208;9209;9210;9211;9212;<br>9213;9214;9215;9216;9217;9218;9219;9220;9221;<br>9222;9223;9224;9225;9226;9227;9228;9229;9230;<br>9231;9232;9233;9234;9235;9236;9237;9238;9241 | 5739;5945;8420<br>;8430;8587;8912;8915;9210;92 | 60;61 |



|     | AZ  | BA | BB | BC | BD  | BE         | BF              | BG                 | BH                                                                                                                                                                                                                                                                                                                                                                                                                                                                                                                                                                                                                                                         | BI                                                                                                                                                                                                                                                                            | BJ                               | BK    |  |  |  |  |                                                                                                                                                                                                                                                                                                                                                                                                                                                                                                                                                                                                                                                                                                                                                                                                                                                                                                                                                                                                                                                                                                                                                                                                                                                                                                                     |  |  |  |  |  |  |  |  |  |  |
|-----|-----|----|----|----|-----|------------|-----------------|--------------------|------------------------------------------------------------------------------------------------------------------------------------------------------------------------------------------------------------------------------------------------------------------------------------------------------------------------------------------------------------------------------------------------------------------------------------------------------------------------------------------------------------------------------------------------------------------------------------------------------------------------------------------------------------|-------------------------------------------------------------------------------------------------------------------------------------------------------------------------------------------------------------------------------------------------------------------------------|----------------------------------|-------|--|--|--|--|---------------------------------------------------------------------------------------------------------------------------------------------------------------------------------------------------------------------------------------------------------------------------------------------------------------------------------------------------------------------------------------------------------------------------------------------------------------------------------------------------------------------------------------------------------------------------------------------------------------------------------------------------------------------------------------------------------------------------------------------------------------------------------------------------------------------------------------------------------------------------------------------------------------------------------------------------------------------------------------------------------------------------------------------------------------------------------------------------------------------------------------------------------------------------------------------------------------------------------------------------------------------------------------------------------------------|--|--|--|--|--|--|--|--|--|--|
|     |     |    |    |    |     |            |                 |                    | 5;476;477;478;479;727;<br>728;729;730;731;732;73<br>3;734;735;751;752;753;<br>754;755;756;757;758;75<br>9;760;761;762;763;808;<br>809;810;811;812;813;81<br>4;1035;1036;1037;1038;<br>1039;1040;1264;1308;1<br>309;1310;1311;1312;13<br>13;1314;1711;1712;171<br>3;1714;1715;1716;1717;<br>1718;1749;1750;1751;1<br>889;1890;1891;1893;18<br>94;1895;1896;1897;189<br>8;1918;1919;1920;1921;<br>1922;1923;1924;1925;1<br>926;1927;1928;1929;19<br>30;1931;2123;2124;212<br>5;2126;2127;2128;2129;<br>2130;2131;2132;2322;2<br>11;127;132;2<br>10;220;240;3<br>04;375;387;4<br>36;451;506;5<br>08;518;566;6<br>27;639;641;6<br>43;648;649;6<br>52;699;707;7 |                                                                                                                                                                                                                                                                               |                                  |       |  |  |  |  | 1449;1450;1451;1452;1453;1454;1455;1456;2193;<br>2194;2195;2196;2197;2198;2199;2200;2201;2202;<br>2203;2204;2205;2206;2207;2208;2209;2210;2211;<br>2212;2213;2214;2215;2216;2217;2247;2248;2249;<br>2250;2251;2252;2253;2254;2255;2256;2257;2258;<br>2259;2260;2261;2262;2263;2264;2265;2266;2267;<br>2268;2269;2270;2271;2272;2273;2274;2275;2276;<br>2277;2278;2279;2280;2281;2364;2365;2366;2367;<br>2368;2369;2370;2371;2940;2941;2942;2943;2944;<br>2945;2946;2947;2948;2949;2950;2951;2952;2953;<br>2954;2955;2956;2957;2958;3593;3594;3692;3693;<br>3694;3695;3696;3697;3698;3699;3700;3701;3702;<br>3703;3704;3705;3706;3707;3708;3709;3710;3711;<br>3712;3713;3714;3715;3716;3717;3718;3719;3720;<br>3721;3722;3723;3724;3725;3726;3727;3728;3729;<br>3730;3731;3732;3733;3734;3735;3736;3737;3738;<br>3739;3740;3741;3742;3743;3744;3745;3746;3747;<br>3748;3749;3750;3751;3752;3753;3754;3755;3756;<br>3757;3758;5829;5830;5831;5832;5833;5834;5835;<br>5836;5837;5838;5839;5840;5841;5842;5843;5844;<br>5845;5846;5847;5848;5849;5850;5851;5852;5853;<br>5854;5928;5929;5930;5931;6325;6326;6327;6328;<br>6329;6331;6332;6333;6334;6335;6336;6337;6404;<br>2375;2394;2395;2396;2<br>397;2398;2399;2400;24<br>01;2402;2405;2514;251<br>5;2516;2517;2518;2519;<br>2520;2521;2522;2523;2<br>1625;1626;1627 |  |  |  |  |  |  |  |  |  |  |
| 104 | 279 |    |    | +  | 102 | 09;710;801 | ;True;True;True | 12;140;146;147;231 | 323;2324;2325;2359;23                                                                                                                                                                                                                                                                                                                                                                                                                                                                                                                                                                                                                                      | 5845;5846;5847;5848;5849;5850;5851;5852;5853;<br>5854;5928;5929;5930;5931;6325;6326;6327;6328;<br>6329;6331;6332;6333;6334;6335;6336;6337;6404;<br>2375;2394;2395;2396;2<br>397;2398;2399;2400;24<br>01;2402;2405;2514;251<br>5;2516;2517;2518;2519;<br>2520;2521;2522;2523;2 | 146;1412;1456;<br>2208;2251;2369 |       |  |  |  |  |                                                                                                                                                                                                                                                                                                                                                                                                                                                                                                                                                                                                                                                                                                                                                                                                                                                                                                                                                                                                                                                                                                                                                                                                                                                                                                                     |  |  |  |  |  |  |  |  |  |  |
| 105 | 3   |    |    | +  | 103 | 410        | TRUE            | 445                | 1625;1626;1627                                                                                                                                                                                                                                                                                                                                                                                                                                                                                                                                                                                                                                             | 5624;5625;5626                                                                                                                                                                                                                                                                | 5625                             | 93    |  |  |  |  |                                                                                                                                                                                                                                                                                                                                                                                                                                                                                                                                                                                                                                                                                                                                                                                                                                                                                                                                                                                                                                                                                                                                                                                                                                                                                                                     |  |  |  |  |  |  |  |  |  |  |
|     |     |    |    |    |     |            |                 |                    | 109;110;165;186;187;18<br>8;189;190;191;260;661;<br>662;663;670;868;869;87<br>4;875;1052;1053;1054;1<br>055;1056;1361;1362;13<br>63;1688;2504;2583;258<br>4;2585;2707;2708;2709;<br>2710;2711;2712;2724;2<br>725;2805;2806;2857;28<br>4;830;831;860;879                                                                                                                                                                                                                                                                                                                                                                                                    |                                                                                                                                                                                                                                                                               |                                  |       |  |  |  |  |                                                                                                                                                                                                                                                                                                                                                                                                                                                                                                                                                                                                                                                                                                                                                                                                                                                                                                                                                                                                                                                                                                                                                                                                                                                                                                                     |  |  |  |  |  |  |  |  |  |  |
| 106 | 31  |    |    | +  | 104 | 798        | ue              | 4;830;831;860;879  | 58                                                                                                                                                                                                                                                                                                                                                                                                                                                                                                                                                                                                                                                         | 9;9267;9268;9269                                                                                                                                                                                                                                                              | ;9138;9267                       | 53;94 |  |  |  |  |                                                                                                                                                                                                                                                                                                                                                                                                                                                                                                                                                                                                                                                                                                                                                                                                                                                                                                                                                                                                                                                                                                                                                                                                                                                                                                                     |  |  |  |  |  |  |  |  |  |  |



|     | AZ  | BA | BB | BC | BD  | BE     | BF         | BG          | BH                                                                                                                                                                                                                                                                                                                                                                                                                                                                                                                                                                                                   | BI                                                                                                                                                                                                                                                                                                                                                                                                                                                                                                                                                                                                                                                                                                                                                                                                                                                                                                                                                                                                                                                                                                                                                                                                                                                                                                           | BJ                                                                                                               | BK      |
|-----|-----|----|----|----|-----|--------|------------|-------------|------------------------------------------------------------------------------------------------------------------------------------------------------------------------------------------------------------------------------------------------------------------------------------------------------------------------------------------------------------------------------------------------------------------------------------------------------------------------------------------------------------------------------------------------------------------------------------------------------|--------------------------------------------------------------------------------------------------------------------------------------------------------------------------------------------------------------------------------------------------------------------------------------------------------------------------------------------------------------------------------------------------------------------------------------------------------------------------------------------------------------------------------------------------------------------------------------------------------------------------------------------------------------------------------------------------------------------------------------------------------------------------------------------------------------------------------------------------------------------------------------------------------------------------------------------------------------------------------------------------------------------------------------------------------------------------------------------------------------------------------------------------------------------------------------------------------------------------------------------------------------------------------------------------------------|------------------------------------------------------------------------------------------------------------------|---------|
|     |     |    |    |    |     |        |            |             | 5;555;556;557;558;559;560;561;692;693;764;765;766;767;815;816;817;818;819;820;828;829;830;831;832;833;834;937;938;939;940;941;942;943;944;945;946;947;1147;1148;1149;1150;1151;1152;1153;1249;1335;1881;2089;2090;2091;2092;2093;2094;2095;2096;2097;2098;2099;2105;2106;2107;2108;2109;2110;2111;2112;2113;2114;2115;2204;2205;2206;2207;2279;2280;2281;2282;2283;2284;2285;2286;2287;2288;2289;2328;2329;2330;2331;2332;2446;2447;2448;2449;2450;2451;2550;2551;2552;2553;2554;2555;2561;2774;2775;2776;2777;2778;2779;2780;2781;2782;2783;2784;2785;2786;2847;2848;2849;2850;2851;2852;2853;2854; | 1058;1059;1060;1061;1062;1063;1749;1750;1751;1752;1753;1754;1755;1756;1757;1758;1759;1760;1761;1762;1763;1764;1765;1766;1767;1768;1769;1770;1771;1772;1773;1774;1775;1776;1777;1778;1779;1780;1781;1782;1783;1784;1785;1786;1787;1788;1789;1790;1791;1792;1793;1794;2086;2087;2282;2283;2284;2285;2286;2372;2373;2374;2375;2376;2377;2378;2379;2380;2381;2382;2383;2384;2385;2386;2387;2388;2389;2398;2399;2400;2401;2402;2403;2404;2405;2406;2407;2639;2640;2641;2642;2643;2644;2645;2646;2647;2648;2649;2650;2651;2652;2653;2654;2655;2656;2657;2658;2659;2660;2661;2662;2663;2664;2665;2666;2667;2668;2669;2670;2671;2672;2673;2674;3364;3365;3366;3367;3368;3369;3370;3371;3573;3574;3840;6311;7014;7015;7016;7017;7018;7019;7020;7021;7022;7023;7024;7025;7026;7027;7028;7029;7030;7031;7032;7033;7034;7035;7036;7037;7038;7039;7040;7041;7042;7043;7044;7045;7046;7047;7048;7049;7050;7057;7058;7059;7060;7061;7062;7063;7064;7065;7066;7067;7068;7069;7070;7071;7072;7073;7074;7075;7362;7363;7364;7365;7366;7563;7564;7565;7566;7567;7568;7569;7570;7571;7572;7573;7574;7575;7576;7577;7578;7579;7706;7707;7708;7709;7710;7711;7712;7713;8000;8001;8002;8003;8004;8005;8357;8358;8359;8360;8361;8362;8363;8364;8365;8366;8367;8368;8369;8370;8371;8372;8373;8374;8375;8376;8377;8378;8379;8380;8381; |                                                                                                                  |         |
| 111 | 205 |    |    | +  | 109 | 74;796 | ;True;True | 851;876;877 | 2855                                                                                                                                                                                                                                                                                                                                                                                                                                                                                                                                                                                                 | 8373;8374;8375;8376;8377;8378;8379;8380;8381;56                                                                                                                                                                                                                                                                                                                                                                                                                                                                                                                                                                                                                                                                                                                                                                                                                                                                                                                                                                                                                                                                                                                                                                                                                                                              | 1054;1783;2086;2284;2386;2398;2674;3366;3574;3840;6311;7016;7058;7065;7364;7565;7578;7707;8003;8368;8390;9061;92 | 101;102 |



|     | AZ  | BA | BB | BC | BD  | BE  | BF   | BG  | BH   | BI | BJ   | BK   |
|-----|-----|----|----|----|-----|-----|------|-----|------|----|------|------|
| 121 | 0 + |    |    |    | 119 | 791 | TRUE | 871 | 2840 |    | 9242 | 9242 |
| 122 | 0 + |    |    |    | 120 | 467 | TRUE | 504 | 1797 |    | 6063 | 6063 |
| 123 | 0   |    |    |    | 121 | 553 | TRUE | 602 | 2084 |    | 7008 | 7008 |
| 124 | 0 + |    |    |    | 122 | 528 | TRUE | 572 | 1958 |    | 6512 | 6512 |
| 125 | 0   |    |    |    | 123 | 480 | TRUE | 517 | 1811 |    | 6078 | 6078 |
| 126 | 1   |    |    |    | 124 | 370 | TRUE | 404 | 1257 |    | 3586 | 3586 |

|     | AZ  | BA | BB | BC | BD  | BE                          | BF                       | BG                      | BH                              | BI                                                | BJ                            | BK   |     |
|-----|-----|----|----|----|-----|-----------------------------|--------------------------|-------------------------|---------------------------------|---------------------------------------------------|-------------------------------|------|-----|
| 127 | 0 + |    |    |    | 125 | 270                         | TRUE                     | 293                     | 899                             |                                                   | 2558                          | 2558 |     |
| 128 | 1   |    |    |    | 126 | 432                         | TRUE                     | 469                     | 1706                            |                                                   | 5818                          | 5818 |     |
| 129 | 9   |    |    |    | 127 | 165;187;282;<br>320;696;785 | True;True;True;True;True | 182;207;305;353;760;864 | 575;660;932;1155;1156;2511;2814 | 1824;1825;2014;2634;3373;3374;3375;8142;9149;9150 | 1825;2014;2634;3375;8142;9149 |      |     |
| 130 | 0   |    |    |    | 128 | 356                         | TRUE                     | 389                     | 1240                            |                                                   | 3563                          | 3563 |     |
| 131 | 0   |    |    |    | 129 | 231                         | TRUE                     | 253                     | 791                             |                                                   | 2330                          | 2330 | 111 |
| 132 | 0   |    |    |    | 130 | 489                         | TRUE                     | 529                     | 1848                            |                                                   | 6236                          | 6236 |     |



|     | AZ | BA | BB | BC | BD  | BE  | BF   | BG    | BH      | BI        | BJ   | BK      |
|-----|----|----|----|----|-----|-----|------|-------|---------|-----------|------|---------|
| 133 | 1  |    |    |    | 131 | 129 | TRUE | 143   | 467     |           | 1419 | 1419    |
| 134 | 0  |    |    |    | 132 | 595 | TRUE | 650   | 2214    | 7374;7375 | 7375 | 112;113 |
| 135 | 0  |    |    |    | 133 | 80  | TRUE | 86;87 | 249;250 | 698;699   | 699  |         |
| 136 | 2  |    |    |    | 134 | 657 | TRUE | 716   | 2416    | 7955;7956 | 7956 |         |
| 137 | 0  |    |    |    | 135 | 485 | TRUE | 523   | 1829    |           | 6164 | 6164    |
| 138 | 0+ |    |    |    | 136 | 148 | TRUE | 164   | 533     |           | 1717 | 1717    |

|     | AZ | BA | BB | BC | BD  | BE      | BF        | BG      | BH               | BI                  | BJ        | BK   |
|-----|----|----|----|----|-----|---------|-----------|---------|------------------|---------------------|-----------|------|
| 139 | 2  |    |    |    | 137 | 621     | TRUE      | 678     | 2293             | 7583;7584           | 7584      |      |
| 140 | 1  |    |    |    | 138 | 340     | TRUE      | 373     | 1207             |                     | 3491      | 3491 |
| 141 | 1  |    |    |    | 139 | 273;698 | True;True | 296;762 | 912;913;914;2513 | 2597;2598;2599;8144 | 2598;8144 |      |
| 142 | 0  |    |    |    | 140 | 311     | TRUE      | 338     | 1057             |                     | 2995      | 2995 |
| 143 | 2  |    |    |    | 141 | 170     | TRUE      | 187     | 585;586          | 1840;1841           | 1841      |      |

|     | AZ  | BA | BB | BC | BD                  | BE                 | BF                               | BG                      | BH                                                                            | BI                                                                                            | BJ                           | BK  |
|-----|-----|----|----|----|---------------------|--------------------|----------------------------------|-------------------------|-------------------------------------------------------------------------------|-----------------------------------------------------------------------------------------------|------------------------------|-----|
| 144 | 0 + |    |    |    | 126;209;371;<br>142 | 426;647            | False;False;False;F<br>alse;True | 139;230;405;463;70<br>5 | 459;460;725;726;1258;1<br>259;1260;1691;1692;16<br>93;1694;1695;2392;239<br>3 | 1410;1411;2191;2192;3587;3588;3589;5797;5798;<br>5799;5800;5801;5802;5803;5804;5805;7861;7862 | 1411;2192;3588<br>;5800;7861 | 56  |
| 145 | 1   |    |    |    | 143                 | 598                | TRUE                             | 653                     | 2217                                                                          | 7378                                                                                          | 7378                         |     |
| 146 | 0   |    |    |    | 144                 | 297                | TRUE                             | 323                     | 1023                                                                          | 2921                                                                                          | 2921                         |     |
| 147 | 3   |    |    |    | 145                 | 15;736;737         | True;True;True                   | 16;807;808              | 59;2667;2668                                                                  | 161;8735;8736                                                                                 | 161;8735;8736                |     |
| 148 | 4   |    |    |    | 146                 | 125;237;678        | True;True;True                   | 138;259;739             | 458;802;2459;2460                                                             | 1409;2349;8014;8015                                                                           | 1409;2349;8015               |     |
| 149 | 6   |    |    |    | 147                 | 58;154;232;2<br>56 | True;True;True;Tr<br>ue          | 63;170;254;278          | 195;541;542;543;544;79<br>2;793;859                                           | 548;1725;1726;1727;1728;2331;2332;2452                                                        | 548;1728;2331;<br>2452       |     |
| 150 | 0   |    |    |    | 148                 | 473                | TRUE                             | 510                     | 1804                                                                          | 6071                                                                                          | 6071                         | 114 |

|     | AZ  | BA | BB | BC | BD  | BE      | BF        | BG      | BH           | BI                                      | BJ        | BK          |
|-----|-----|----|----|----|-----|---------|-----------|---------|--------------|-----------------------------------------|-----------|-------------|
| 151 | 0 + |    |    |    | 149 | 568     | TRUE      | 618     | 2135         | 7142                                    | 7142      |             |
| 152 | 0 + |    |    |    | 150 | 206     | TRUE      | 227     | 715          | 2161                                    | 2161      | 115         |
| 153 | 8   |    |    |    | 151 | 162;364 | True;True | 178;398 | 568;569;1250 | 1811;1812;1813;1814;1815;1816;1817;3575 | 1813;3575 |             |
| 154 | 1   |    |    |    | 152 | 478     | TRUE      | 515     | 1809         | 6076                                    | 6076      |             |
| 155 | 0   |    |    |    | 153 | 24      | TRUE      | 26      | 96;97        | 264;265;266                             | 265       | 116;117;118 |

|     | AZ  | BA | BB | BC | BD  | BE  | BF   | BG  | BH        | BI        | BJ   | BK   |     |
|-----|-----|----|----|----|-----|-----|------|-----|-----------|-----------|------|------|-----|
| 156 | 1   |    |    |    | 154 | 163 | TRUE | 179 | 570       |           | 1818 | 1818 |     |
| 157 | 0   |    |    |    | 155 | 549 | TRUE | 598 | 2074      |           | 6991 | 6991 |     |
| 158 | 0   |    |    |    | 156 | 578 | TRUE | 630 | 2177;2178 | 7293;7294 |      | 7294 |     |
| 159 | 0   |    |    |    | 157 | 360 | TRUE | 394 | 1246      |           | 3570 | 3570 | 119 |
| 160 | 0 + |    |    |    | 158 | 565 | TRUE | 615 | 2122      |           | 7082 | 7082 |     |

|     | AZ  | BA | BB | BC | BD  | BE      | BF        | BG      | BH                     | BI                                             | BJ        | BK |
|-----|-----|----|----|----|-----|---------|-----------|---------|------------------------|------------------------------------------------|-----------|----|
| 161 | 0 + |    |    |    | 159 | 492     | TRUE      | 532     | 1858                   | 6256                                           | 6256      |    |
| 162 | 0 + |    |    |    | 160 | 258     | TRUE      | 280     | 863                    | 2462                                           | 2462      |    |
| 163 | 0   |    |    |    | 161 | 379     | TRUE      | 413     | 1281                   | 3628                                           | 3628      |    |
| 164 | 0   |    |    |    | 162 | 722     | TRUE      | 791     | 2616                   | 8564                                           | 8564      |    |
| 165 | 0   |    |    |    | 163 | 502     | TRUE      | 544     | 1882                   | 6312                                           | 6312      |    |
| 166 | 7   |    |    |    | 164 | 83;390  | True;True | 90;424  | 253;254;1330;1331;1332 | 702;703;704;3831;3832;3833;3834;3835;3836;3837 | 703;3837  |    |
| 167 | 6   |    |    |    | 165 | 300;795 | True;True | 326;875 | 1028;2844;2845;2846    | 2931;9246;9247;9248;9249;9250                  | 2931;9248 |    |
| 168 | 7   |    |    |    | 166 | 378     | TRUE      | 412     | 1277;1278;1279;1280    | 3621;3622;3623;3624;3625;3626;3627             | 3622      |    |

|     | AZ  | BA | BB | BC | BD  | BE          | BF                | BG              | BH | BI                                                                                                                                                                                                                                                                                                                                                                                                                                                                                                                                                                                                                                                                                                                                                                                                                                                                                                                                      | BJ | BK |                                                             |                                                           |                                                                             |  |                                                                      |                 |                                                                                                                                                                                                                                                                                                                                                                                                                                                                                                                                                                                                                                                                                                                                                                                                                                                                                                                                                                           |  |  |                                                                                   |  |                                                                |                                 |  |
|-----|-----|----|----|----|-----|-------------|-------------------|-----------------|----|-----------------------------------------------------------------------------------------------------------------------------------------------------------------------------------------------------------------------------------------------------------------------------------------------------------------------------------------------------------------------------------------------------------------------------------------------------------------------------------------------------------------------------------------------------------------------------------------------------------------------------------------------------------------------------------------------------------------------------------------------------------------------------------------------------------------------------------------------------------------------------------------------------------------------------------------|----|----|-------------------------------------------------------------|-----------------------------------------------------------|-----------------------------------------------------------------------------|--|----------------------------------------------------------------------|-----------------|---------------------------------------------------------------------------------------------------------------------------------------------------------------------------------------------------------------------------------------------------------------------------------------------------------------------------------------------------------------------------------------------------------------------------------------------------------------------------------------------------------------------------------------------------------------------------------------------------------------------------------------------------------------------------------------------------------------------------------------------------------------------------------------------------------------------------------------------------------------------------------------------------------------------------------------------------------------------------|--|--|-----------------------------------------------------------------------------------|--|----------------------------------------------------------------|---------------------------------|--|
|     |     |    |    |    |     |             |                   |                 |    | 1242;1243;1244;1245;1246;1247;1248;1249;1250;<br>1251;1252;1253;1254;1255;1256;1257;1258;1259;<br>1260;1261;1262;1263;1264;1265;1266;1267;1268;<br>1269;1270;1271;1272;1273;1274;1275;1276;1277;<br>1278;1279;1280;1281;1282;1283;1284;1285;1286;<br>1287;1288;1289;1290;1291;1292;1293;1294;1295;<br>1296;1297;1298;1299;1300;1301;1302;1303;1304;<br>1305;1306;1307;1308;1309;1310;1311;1312;1313;<br>1314;1315;1316;1317;1318;1319;1320;1321;1322;<br>411;412;413;414;415;41<br>6;417;418;419;420;421;<br>422;423;424;425;426;42<br>7;428;429;430;431;432;<br>433;434;435;436;437;43<br>8;439;440;441;442;443;<br>444;445;446;447;448;44<br>9;965;966;967;968;969;<br>970;971;972;973;974;97<br>5;976;977;978;979;980;<br>981;982;983;984;985;98<br>6;987;988;989;990;991;<br>2140;2141;2142;2143;2<br>144;2145;2146;2147;21<br>48;2149;2150;2151;215<br>2;2153;2154;2155;2156;<br>121;122;290;<br>572;573;594;<br>True;True;True;Tr |    |    |                                                             |                                                           |                                                                             |  |                                                                      |                 | 1323;1324;1325;1326;1327;1328;1329;1330;1331;<br>1332;1333;1334;1335;1336;1337;1338;1339;1340;<br>1341;1342;1343;1344;1345;1346;1347;1348;1349;<br>1350;1351;1352;1353;1354;1355;1356;1357;1358;<br>1359;1360;1361;1362;1363;1364;1365;1366;1367;<br>1368;1369;1370;1371;1372;1373;1374;1375;1376;<br>1377;1378;1379;1380;1381;1382;1383;1384;1385;<br>1386;1387;1388;1389;1390;1391;1392;1393;1394;<br>1395;1396;2739;2740;2741;2742;2743;2744;2745;<br>2746;2747;2748;2749;2750;2751;2752;2753;2754;<br>2755;2756;2757;2758;2759;2760;2761;2762;2763;<br>2764;2765;2766;2767;2768;2769;2770;2771;2772;<br>2773;2774;2775;2776;2777;2778;2779;2780;2781;<br>2782;2783;2784;2785;2786;2787;2788;2789;2790;<br>2791;2792;2793;2794;2795;2796;2797;2798;2799;<br>2800;2801;2802;2803;2804;2805;2806;2807;2808;<br>2809;2810;2811;2812;2813;2814;2815;2816;2817;<br>2818;2819;2820;2821;2822;2823;2824;2825;2826;<br>2827;2828;2829;2830;7147;7148;7149;7150;7151;<br>3;8452 |  |  | 132;133;134;135;31<br>3;314;622;623;624;<br>161;2162;2163;2164;22<br>12;2213;2586 |  | 2157;2158;2159;2160;2<br>161;2162;2163;2164;22<br>12;2213;2586 | 1364;1395;2815<br>7182;7255;737 |  |
| 169 | 166 |    |    |    | 167 | 714         | ue;True;True;True | 625;648;649;781 |    | 367;368;369;370;371;372;373;374;375;376;377;37<br>8;379;380;381;382;383;384;385;386;387;388;389;<br>90;391;392;965;998;999;1000;1001;1002;1003;100<br>4;1005;1006;1007;1008;1009;1010;1011;1012;101<br>3;1014;1015;1016;1017;1018;1019;1020;1420;142<br>1;1422;1423;1424;1425;1426;1427;1428;1429;143<br>0;1431;1432;1433;1434;1435;1722;1723;6967;696<br>8;6969;6970;6971;6972;6973;6989;6990;8017;801<br>8;8019;8020;8021;8022;8023;8024;8025;8026;802<br>7;8028;8029;8030;8031;8032;8033;8034;8035;803<br>6;8037;8933;8934;8935;8936;8937;8938;8939;894<br>0;8941;8942;8943;8944;8945;8946;8947;8948;894<br>9;8950;8951;8952;8953;8954;8955;8956;8957;895<br>8;8959;8960;9080;9081;9082;9083;9084;9085;908<br>6;9087;9088;9089;9090;9091;9092;9093;9094;909<br>5;9096;9097;9098;9099;9100;9101;9102;9103;910<br>4;9105;9106                                                                                                          |    |    | 41;42;90;93;<br>130;152;533;<br>541;548;680;<br>767;780;781 | ue;True;True;True<br>ue;True;True;True<br>ue;True;True;Tr | 43;44;45;97;102;14<br>4;168;590;597;741;<br>742;743;744;840;84<br>1;857;858 |  | 379;391;965;10<br>15;1421;1722;6<br>970;6990;8019;<br>8952;9092;9106 | 0;1;2;3;122;123 |                                                                                                                                                                                                                                                                                                                                                                                                                                                                                                                                                                                                                                                                                                                                                                                                                                                                                                                                                                           |  |  |                                                                                   |  |                                                                |                                 |  |
| 170 | 67  |    |    |    | 168 | 767;780;781 | ue;True;True      | 1;857;858       | 95 |                                                                                                                                                                                                                                                                                                                                                                                                                                                                                                                                                                                                                                                                                                                                                                                                                                                                                                                                         |    |    |                                                             |                                                           |                                                                             |  |                                                                      |                 |                                                                                                                                                                                                                                                                                                                                                                                                                                                                                                                                                                                                                                                                                                                                                                                                                                                                                                                                                                           |  |  |                                                                                   |  |                                                                |                                 |  |

|     | AZ  | BA | BB | BC | BD  | BE                                     | BF                                 | BG                                         | BH  | BI                                                                                                                                                                                                                                                                                                                                                                                                                                                                                                                                                                                                                                                | BJ                                                                       | BK                           |  |
|-----|-----|----|----|----|-----|----------------------------------------|------------------------------------|--------------------------------------------|-----|---------------------------------------------------------------------------------------------------------------------------------------------------------------------------------------------------------------------------------------------------------------------------------------------------------------------------------------------------------------------------------------------------------------------------------------------------------------------------------------------------------------------------------------------------------------------------------------------------------------------------------------------------|--------------------------------------------------------------------------|------------------------------|--|
| 171 | 101 |    |    |    | 169 | 63;131;144;161;309;418;570;637;701;745 | True;True;True;True;True;True;True | 68;145;160;177;336;454;620;694;695;767;816 |     | 560;561;562;1436;1437;1438;1439;1440;1441;1442;1443;1582;1796;1797;1798;1799;1800;1801;1802;1803;1804;1805;1806;1807;1808;1809;1810;2974;2975;2976;2977;2978;2979;5704;5705;5706;5707;5708;5709;5710;5711;5712;5713;5714;5715;5716;5717;5718;5719;5720;5721;5722;5723;5724;5725;205;470;471;472;473;510;563;564;565;566;567;1049;1050;1051;1652;1653;1654;1655;1656;1657;5726;5727;5728;5729;5730;5731;5732;5733;5734;5735;5736;5737;5738;7144;7145;7750;7751;7752;7753;7754;7755;7756;7757;7758;7759;7760;8316;8317;8318;8319;8320;8321;8322;8323;8324;8325;8326;8327;8328;8329;8330;8331;8332;8333;8334;8335;8336;8337;8338;8339;8340;8341;8796 | 560;1441;1582;1810;2979;5705;7144;7759;8331;8796                         | 124                          |  |
| 172 | 3   |    |    |    | 170 | 168;218;278;691                        | False;True;True;True               | 185;240;301;755                            |     | 581;582;583;749;923;924;2503                                                                                                                                                                                                                                                                                                                                                                                                                                                                                                                                                                                                                      | 1835;2245;2622;8131                                                      |                              |  |
| 173 | 14  |    |    |    | 171 | 33;205;408;521;758;777                 | True;True;True;True                | 35;226;442;565;829;854                     |     | 118;119;714;1378;1379;1380;1934;2722;2723;2789                                                                                                                                                                                                                                                                                                                                                                                                                                                                                                                                                                                                    | 329;330;2160;3962;3963;3964;3965;6432;6433;6434;8873;8874;8875;8876;9072 | 330;2160;3962;6433;8874;9072 |  |
| 174 | 1   |    |    |    | 172 | 251                                    | TRUE                               | 273                                        | 851 | 2436                                                                                                                                                                                                                                                                                                                                                                                                                                                                                                                                                                                                                                              | 2436                                                                     |                              |  |
| 175 | 29  |    |    |    | 173 | 158;308;469;676;827                    | True;True;True;True                | 174;335;506;737;911                        |     | 551;552;553;554;1045;1046;1047;1048;1799;1800;2455;2981;2982;2983;1741;1742;1743;1744;1745;1746;1747;1748;2963;2964;2965;2966;2967;2968;2969;2970;2971;2972;2973;6066;6067;8009;9674;9675;9676;9677;9678;9679;9680                                                                                                                                                                                                                                                                                                                                                                                                                                | 1741;2967;6067;8009;9677                                                 |                              |  |



|     | AZ  | BA | BB | BC | BD  | BE         | BF                  | BG          | BH                                                                          | BI                                                                                                                                                                                                                                                                                                                                                                                                                                                                                                                                                                                                                                                                                                                                                                                                                                                                                                                                                                                                                                                                                                                                                                                                                                                                                                                                                                                                                                                                                                                                                                                                                                                                                                                                                                                                                                                                                                                                                                                                                                                                                                                                                                                                                                                                                                                                                                                                                                                                                                                                                                                                                                                                                                                                                                                                                                                                                                                                                                                                                                                                                                                                                                                                                                                                                                                                                                                                                                                                                                                                                                                                                                                                                                                                   | BJ                                | BK  |
|-----|-----|----|----|----|-----|------------|---------------------|-------------|-----------------------------------------------------------------------------|--------------------------------------------------------------------------------------------------------------------------------------------------------------------------------------------------------------------------------------------------------------------------------------------------------------------------------------------------------------------------------------------------------------------------------------------------------------------------------------------------------------------------------------------------------------------------------------------------------------------------------------------------------------------------------------------------------------------------------------------------------------------------------------------------------------------------------------------------------------------------------------------------------------------------------------------------------------------------------------------------------------------------------------------------------------------------------------------------------------------------------------------------------------------------------------------------------------------------------------------------------------------------------------------------------------------------------------------------------------------------------------------------------------------------------------------------------------------------------------------------------------------------------------------------------------------------------------------------------------------------------------------------------------------------------------------------------------------------------------------------------------------------------------------------------------------------------------------------------------------------------------------------------------------------------------------------------------------------------------------------------------------------------------------------------------------------------------------------------------------------------------------------------------------------------------------------------------------------------------------------------------------------------------------------------------------------------------------------------------------------------------------------------------------------------------------------------------------------------------------------------------------------------------------------------------------------------------------------------------------------------------------------------------------------------------------------------------------------------------------------------------------------------------------------------------------------------------------------------------------------------------------------------------------------------------------------------------------------------------------------------------------------------------------------------------------------------------------------------------------------------------------------------------------------------------------------------------------------------------------------------------------------------------------------------------------------------------------------------------------------------------------------------------------------------------------------------------------------------------------------------------------------------------------------------------------------------------------------------------------------------------------------------------------------------------------------------------------------------------|-----------------------------------|-----|
| 176 | 0   |    |    |    | 174 | 180;497    | True;True           | 199;538;539 | 635;636;637;638;1864;1865;1866;1867;1868;1869;1870;1871;1872;1873;1874;1875 | 1973;1974;1975;1976;1977;1978;1979;1980;1981;1982;1983;1984;6262;6263;6264;6265;6266;6267;6268;6269;6270;6271;6272;6273;6274;6275;6276;6277;6278;6279;6280;6281;6282;6283;6284;6285;6286;6287;6288;6289;6290;6291;6292;6293;6294;6295;6296;6297;6298;6299;6300;6301;6302                                                                                                                                                                                                                                                                                                                                                                                                                                                                                                                                                                                                                                                                                                                                                                                                                                                                                                                                                                                                                                                                                                                                                                                                                                                                                                                                                                                                                                                                                                                                                                                                                                                                                                                                                                                                                                                                                                                                                                                                                                                                                                                                                                                                                                                                                                                                                                                                                                                                                                                                                                                                                                                                                                                                                                                                                                                                                                                                                                                                                                                                                                                                                                                                                                                                                                                                                                                                                                                             | 1975;6298                         | 125 |
| 177 | 3   |    |    |    | 175 | 166;248    | True;True           | 183;270     | 576;847;848                                                                 | 1826;2432;2433                                                                                                                                                                                                                                                                                                                                                                                                                                                                                                                                                                                                                                                                                                                                                                                                                                                                                                                                                                                                                                                                                                                                                                                                                                                                                                                                                                                                                                                                                                                                                                                                                                                                                                                                                                                                                                                                                                                                                                                                                                                                                                                                                                                                                                                                                                                                                                                                                                                                                                                                                                                                                                                                                                                                                                                                                                                                                                                                                                                                                                                                                                                                                                                                                                                                                                                                                                                                                                                                                                                                                                                                                                                                                                                       | 1826;2433                         |     |
| 178 | 11  |    |    |    | 176 | 39;184;429 | True;True;True      | 41;203;466  | 130;131;132;647;1701;1702                                                   | 359;360;361;362;363;364;365;1995;5812;5813;5814                                                                                                                                                                                                                                                                                                                                                                                                                                                                                                                                                                                                                                                                                                                                                                                                                                                                                                                                                                                                                                                                                                                                                                                                                                                                                                                                                                                                                                                                                                                                                                                                                                                                                                                                                                                                                                                                                                                                                                                                                                                                                                                                                                                                                                                                                                                                                                                                                                                                                                                                                                                                                                                                                                                                                                                                                                                                                                                                                                                                                                                                                                                                                                                                                                                                                                                                                                                                                                                                                                                                                                                                                                                                                      | 365;1995;5813                     |     |
| 179 | 0 + |    |    |    | 177 | 688        | TRUE                | 752         | 2495                                                                        | 8117                                                                                                                                                                                                                                                                                                                                                                                                                                                                                                                                                                                                                                                                                                                                                                                                                                                                                                                                                                                                                                                                                                                                                                                                                                                                                                                                                                                                                                                                                                                                                                                                                                                                                                                                                                                                                                                                                                                                                                                                                                                                                                                                                                                                                                                                                                                                                                                                                                                                                                                                                                                                                                                                                                                                                                                                                                                                                                                                                                                                                                                                                                                                                                                                                                                                                                                                                                                                                                                                                                                                                                                                                                                                                                                                 | 8117                              | 126 |
| 180 | 35  |    |    |    | 178 | 1          | True;True;True;True | 568;893     | 7;146;168;279;414;524;811                                                   | 104;105;106;107;108;109;110;111;112;113;114;115;116;117;118;119;120;121;122;123;124;125;126;127;128;129;130;131;132;133;134;135;136;137;138;139;140;141;142;143;144;145;146;147;148;149;150;151;152;153;154;155;156;157;158;159;160;161;162;163;164;165;166;167;168;169;170;171;172;173;174;175;176;177;178;179;180;181;182;183;184;185;186;187;188;189;190;191;192;193;194;195;196;197;198;199;200;201;202;203;204;205;206;207;208;209;210;211;212;213;214;215;216;217;218;219;220;221;222;223;224;225;226;227;228;229;230;231;232;233;234;235;236;237;238;239;240;241;242;243;244;245;246;247;248;249;250;251;252;253;254;255;256;257;258;259;260;261;262;263;264;265;266;267;268;269;270;271;272;273;274;275;276;277;278;279;280;281;282;283;284;285;286;287;288;289;290;291;292;293;294;295;296;297;298;299;300;301;302;303;304;305;306;307;308;309;310;311;312;313;314;315;316;317;318;319;320;321;322;323;324;325;326;327;328;329;330;331;332;333;334;335;336;337;338;339;340;341;342;343;344;345;346;347;348;349;350;351;352;353;354;355;356;357;358;359;360;361;362;363;364;365;366;367;368;369;370;371;372;373;374;375;376;377;378;379;380;381;382;383;384;385;386;387;388;389;390;391;392;393;394;395;396;397;398;399;400;401;402;403;404;405;406;407;408;409;410;411;412;413;414;415;416;417;418;419;420;421;422;423;424;425;426;427;428;429;430;431;432;433;434;435;436;437;438;439;440;441;442;443;444;445;446;447;448;449;450;451;452;453;454;455;456;457;458;459;460;461;462;463;464;465;466;467;468;469;470;471;472;473;474;475;476;477;478;479;480;481;482;483;484;485;486;487;488;489;490;491;492;493;494;495;496;497;498;499;500;501;502;503;504;505;506;507;508;509;510;511;512;513;514;515;516;517;518;519;520;521;522;523;524;525;526;527;528;529;530;531;532;533;534;535;536;537;538;539;540;541;542;543;544;545;546;547;548;549;550;551;552;553;554;555;556;557;558;559;560;561;562;563;564;565;566;567;568;569;570;571;572;573;574;575;576;577;578;579;580;581;582;583;584;585;586;587;588;589;590;591;592;593;594;595;596;597;598;599;600;601;602;603;604;605;606;607;608;609;610;611;612;613;614;615;616;617;618;619;620;621;622;623;624;625;626;627;628;629;630;631;632;633;634;635;636;637;638;639;640;641;642;643;644;645;646;647;648;649;650;651;652;653;654;655;656;657;658;659;660;661;662;663;664;665;666;667;668;669;670;671;672;673;674;675;676;677;678;679;680;681;682;683;684;685;686;687;688;689;690;691;692;693;694;695;696;697;698;699;700;701;702;703;704;705;706;707;708;709;710;711;712;713;714;715;716;717;718;719;720;721;722;723;724;725;726;727;728;729;730;731;732;733;734;735;736;737;738;739;740;741;742;743;744;745;746;747;748;749;750;751;752;753;754;755;756;757;758;759;760;761;762;763;764;765;766;767;768;769;770;771;772;773;774;775;776;777;778;779;780;781;782;783;784;785;786;787;788;789;790;791;792;793;794;795;796;797;798;799;800;801;802;803;804;805;806;807;808;809;810;811;812;813;814;815;816;817;818;819;820;821;822;823;824;825;826;827;828;829;830;831;832;833;834;835;836;837;838;839;840;841;842;843;844;845;846;847;848;849;850;851;852;853;854;855;856;857;858;859;860;861;862;863;864;865;866;867;868;869;870;871;872;873;874;875;876;877;878;879;880;881;882;883;884;885;886;887;888;889;890;891;892;893;894;895;896;897;898;899;900;901;902;903;904;905;906;907;908;909;910;911;912;913;914;915;916;917;918;919;920;921;922;923;924;925;926;927;928;929;930;931;932;933;934;935;936;937;938;939;940;941;942;943;944;945;946;947;948;949;950;951;952;953;954;955;956;957;958;959;960;961;962;963;964;965;966;967;968;969;970;971;972;973;974;975;976;977;978;979;980;981;982;983;984;985;986;987;988;989;990;991;992;993;994;995;996;997;998;999;1000 | 109;1711;1835;2626;5700;6449;9408 |     |

|     | AZ  | BA | BB | BC | BD  | BE          | BF             | BG          | BH                       | BI                                 | BJ             | BK      |
|-----|-----|----|----|----|-----|-------------|----------------|-------------|--------------------------|------------------------------------|----------------|---------|
| 181 | 5   |    |    |    | 179 | 51;615      | True;True      | 56;671      | 183;2269;2270;2271       | 527;7520;7521;7522;7523            | 527;7520       |         |
| 182 | 6   |    |    |    | 180 | 752         | TRUE           | 823         | 2702;2703;2704;2705;2706 | 8816;8817;8818;8819;8820;8821      | 8821           |         |
| 183 | 3   |    |    |    | 181 | 29;631      | True;True      | 31;688      | 108;2338                 | 288;7730;7731                      | 288;7731       |         |
| 184 | 0 + |    |    |    | 182 | 76          | TRUE           | 82          | 245                      | 694                                | 694            |         |
| 185 | 7   |    |    |    | 183 | 199;766;776 | True;True;True | 219;839;853 | 690;691;2746;2788        | 2081;2082;2083;2084;2085;8932;9071 | 2084;8932;9071 |         |
| 186 | 0   |    |    |    | 184 | 372         | TRUE           | 406         | 1261                     | 3590                               | 3590           | 127;128 |
| 187 | 4   |    |    |    | 185 | 344;660;720 | True;True;True | 377;720;789 | 1215;1216;2422;2610;2611 | 3500;3501;7963;8551;8552           | 3501;7963;8551 |         |

|     | AZ  | BA | BB | BC | BD  | BE                                                   | BF                                                      | BG                                              | BH                                                                                                                                                                                                                                                                                                                                                                                                                    | BI                                                                                                                                                                                                                                                                                                                                                                                                                                                                                                                                                                                                                                                                                                                                                                                                                                                                                                                                                                                                                                                                                                                                                                                                                                                                                                                   | BJ                                                            | BK |
|-----|-----|----|----|----|-----|------------------------------------------------------|---------------------------------------------------------|-------------------------------------------------|-----------------------------------------------------------------------------------------------------------------------------------------------------------------------------------------------------------------------------------------------------------------------------------------------------------------------------------------------------------------------------------------------------------------------|----------------------------------------------------------------------------------------------------------------------------------------------------------------------------------------------------------------------------------------------------------------------------------------------------------------------------------------------------------------------------------------------------------------------------------------------------------------------------------------------------------------------------------------------------------------------------------------------------------------------------------------------------------------------------------------------------------------------------------------------------------------------------------------------------------------------------------------------------------------------------------------------------------------------------------------------------------------------------------------------------------------------------------------------------------------------------------------------------------------------------------------------------------------------------------------------------------------------------------------------------------------------------------------------------------------------|---------------------------------------------------------------|----|
| 188 | 36  |    |    |    | 186 | 98;147;173;186<br>85;194;209;321;339;513;555;653;740 | True;True;True;True;True;False;True;True;True;True;True | 107;163;191;204;243;230;354;372;555;604;712;811 | 348;349;530;531;532;612;648;649;678;679;725;726;1157;1158;1159;1160;1204;1205;1206;1910;2088;2406;2677;2678                                                                                                                                                                                                                                                                                                           | 1046;1047;1048;1712;1713;1714;1715;1716;1920;1996;1997;2061;2062;2063;2191;2192;3376;3377;3378;3379;3380;3381;3382;3383;3384;3385;3386;3486;3487;3488;3489;3490;6384;7013;7934;7935;8777;8778;8779                                                                                                                                                                                                                                                                                                                                                                                                                                                                                                                                                                                                                                                                                                                                                                                                                                                                                                                                                                                                                                                                                                                   | 1046;1714;1920;1997;2063;2192;3386;3487;6384;7013;7935;8777   |    |
| 189 | 1   |    |    |    | 187 | 460                                                  | TRUE                                                    | 497                                             | 1776                                                                                                                                                                                                                                                                                                                                                                                                                  | 5982                                                                                                                                                                                                                                                                                                                                                                                                                                                                                                                                                                                                                                                                                                                                                                                                                                                                                                                                                                                                                                                                                                                                                                                                                                                                                                                 | 5982                                                          |    |
| 190 | 9   |    |    |    | 188 | 137;224;742                                          | True;True;True                                          | 153;246;813                                     | 489;772;773;774;775;2680;2681;2682                                                                                                                                                                                                                                                                                                                                                                                    | 1470;2292;2293;2294;2295;2296;2297;2298;8781;8782;8783                                                                                                                                                                                                                                                                                                                                                                                                                                                                                                                                                                                                                                                                                                                                                                                                                                                                                                                                                                                                                                                                                                                                                                                                                                                               | 1470;2296;8783                                                |    |
| 191 | 304 |    |    |    | 189 | 18;40;64;145;167;358;383;465;609;616;623;760;824     | True;True;True;True;True;True;True;True;True            | 191;417;502;665;672;680;832;907                 | 66;67;68;133;206;207;208;209;210;211;212;213;214;215;511;512;513;514;515;516;517;518;519;520;521;522;523;524;525;526;527;528;577;578;579;580;1242;1292;1293;1294;1295;1296;1297;1792;1793;1794;1795;2253;2254;2255;2256;2272;2273;2274;2275;2276;2277;2278;2296;2297;2298;2299;2300;2301;2302;2303;2304;2305;2306;2307;2308;2309;2310;2311;2312;2313;2314;2315;2316;2317;2318;2726;2727;2728;2729;2964;2965;2966;2967 | 6;567;568;569;570;571;572;573;574;575;576;577;578;579;580;581;582;583;584;585;586;587;588;589;590;591;592;593;594;595;596;597;598;599;600;601;602;603;604;605;606;607;608;609;610;611;612;613;614;615;616;617;618;619;620;621;622;623;624;625;626;627;628;629;630;631;632;633;634;635;1583;1584;1585;1586;1587;1588;1589;1590;1591;1592;1593;1594;1595;1596;1597;1598;1599;1600;1601;1602;1603;1604;1605;1606;1607;1608;1609;1610;1611;1612;1613;1614;1615;1616;1617;1618;1619;1620;1621;1622;1623;1624;1625;1626;1627;1628;1629;1630;1631;1632;1633;1634;1635;1636;1637;1638;1639;1640;1641;1642;1643;1644;1645;1646;1647;1648;1649;1650;1651;1652;1653;1654;1655;1656;1657;1658;1659;1660;1661;1662;1663;1664;1665;1666;1667;1668;1669;1670;1671;1672;1673;1674;1675;1676;1677;1678;1679;1680;1681;1682;1683;1684;1685;1686;1687;1688;1689;1690;1691;1692;1693;1694;1695;1696;1697;1698;1699;1700;1701;1702;1703;1704;1705;1706;1707;1708;1709;1710;1827;1828;1829;1830;1831;1832;1833;1834;3565;3644;3645;3646;3647;3648;3649;3650;3651;3652;3653;3654;3655;3656;3657;3658;3659;3660;2307;2308;2309;2310;2311;2312;2313;2314;50;6051;6052;6053;6054;6055;6056;6057;6058;6059;6060;6061;7483;7484;7485;7486;7487;7488;7489;7490;7491;7492;7493;7494;7524;7525;7526;7527;7528;7529;7530;7531;7532;7533;7534;7535;75 | 173;366;602;1584;1833;3565;3662;6058;7485;7547;7641;8895;9602 |    |

|     | AZ  | BA | BB | BC | BD  | BE              | BF                  | BG              | BH                                                                          | BI                                                                                                                                                                                                                                                                       | BJ                  | BK                                          |
|-----|-----|----|----|----|-----|-----------------|---------------------|-----------------|-----------------------------------------------------------------------------|--------------------------------------------------------------------------------------------------------------------------------------------------------------------------------------------------------------------------------------------------------------------------|---------------------|---------------------------------------------|
| 192 | 0   |    |    |    | 190 | 741             | TRUE                | 812             | 2679                                                                        | 8780                                                                                                                                                                                                                                                                     | 8780                | 130                                         |
| 193 | 0   |    |    |    | 191 | 118;271;442;562 | True;True;True;True | 129;294;479;612 | 406;407;408;900;901;902;903;904;905;1732;1733;1734;1735;2116;2117;2118;2119 | 1226;1227;1228;1229;1230;2559;2560;2561;2562;2563;2564;2565;2566;2567;2568;2569;2570;2571;2572;2573;2574;2575;2576;2577;2578;2579;2580;5888;5889;5890;5891;5892;5893;5894;5895;5896;5897;5898;5899;5900;5901;5902;5903;5904;5905;5906;5907;5908;5909;7076;7077;7078;7079 | 1226;2576;5905;7078 | 131;132;133;134;135;136;137;138;139;140;141 |
| 194 | 8   |    |    |    | 192 | 198             | TRUE                | 218             | 687;688;689                                                                 | 2073;2074;2075;2076;2077;2078;2079;2080                                                                                                                                                                                                                                  | 2075                |                                             |
| 195 | 0   |    |    |    | 193 | 252             | TRUE                | 274             |                                                                             | 852                                                                                                                                                                                                                                                                      | 2437                | 2437                                        |
| 196 | 1   |    |    |    | 194 | 151             | TRUE                | 167             |                                                                             | 537                                                                                                                                                                                                                                                                      | 1721                | 1721                                        |
| 197 | 0 + |    |    |    | 195 | 119             | TRUE                | 130             |                                                                             | 409                                                                                                                                                                                                                                                                      | 1231                | 1231                                        |
| 198 | 3   |    |    |    | 196 | 431;806         | True;True           | 468;887         | 1705;2894;2895                                                              | 5817;9355;9356                                                                                                                                                                                                                                                           | 5817;9355           |                                             |



|     | AZ  | BA | BB | BC | BD  | BE          | BF                  | BG             | BH                                             | BI                                                                                                                                                                                                                                                                                                                                                                                                                                                                                                                                                                                                                                                                                                                                                                                                                       | BJ                 | BK  |  |  |  |  |  |  |  |  |  |  |
|-----|-----|----|----|----|-----|-------------|---------------------|----------------|------------------------------------------------|--------------------------------------------------------------------------------------------------------------------------------------------------------------------------------------------------------------------------------------------------------------------------------------------------------------------------------------------------------------------------------------------------------------------------------------------------------------------------------------------------------------------------------------------------------------------------------------------------------------------------------------------------------------------------------------------------------------------------------------------------------------------------------------------------------------------------|--------------------|-----|--|--|--|--|--|--|--|--|--|--|
|     |     |    |    |    |     |             |                     |                |                                                | 235;236;237;238;239;240;241;242;243;244;245;246;247;248;249;557;558;559;966;967;968;969;970;971;972;973;974;975;976;977;978;979;980;981;982;983;984;985;986;987;988;989;990;991;992;993;994;995;996;1100;1101;1102;1103;1104;1105;1106;1107;1108;1109;1110;1111;1112;1113;1114;1115;1116;1117;1118;1119;1120;1121;1122;1123;1124;1125;1126;1127;1128;1129;1130;1397;1398;1399;1400;1401;1402;1403;1404;1819;1820;1821;1822;1823;2628;2629;2630;2631;2632;2633;2913;2914;2915;2916;2917;2918;3510;3511;3512;3513;3514;386;87;88;89;90;202;203;204;312;313;314;315;316;317;318;319;370;371;372;373;374;375;376;377;378;450;451;452;453;454;571;572;573;574;928;929;930;931;1015;1016;1017;1018;1019;1020;1224;1225;1226;1227;1228;1229;1230;1231;2103;2104;2475;2476;2477;22;61;62;91;109;110;123;164;281;295;351;559;682; |                    |     |  |  |  |  |  |  |  |  |  |  |
| 204 | 220 |    |    |    | 202 | 716;727     | ;True               | 83;784;797     | 7;2638;2639;2640;2641                          | 657;8658;8659;8660;8661;8662;8663;8664                                                                                                                                                                                                                                                                                                                                                                                                                                                                                                                                                                                                                                                                                                                                                                                   | 8090;8462;8622     | 144 |  |  |  |  |  |  |  |  |  |  |
| 205 | 4   |    |    |    | 203 | 73;108;322  | True;True;True      | 79;117;355     | 241;242;369;1161;1162                          | 689;690;691;1099;3387;3388;3389                                                                                                                                                                                                                                                                                                                                                                                                                                                                                                                                                                                                                                                                                                                                                                                          | 691;1099;3388      |     |  |  |  |  |  |  |  |  |  |  |
| 206 | 28  |    |    |    | 204 | 113;335;743 | True;True;True      | 124;368;814    | 397;398;399;1192;1193;1194;2683;2684;2685;2686 | 1214;1215;1216;1217;1218;1219;3457;3458;3459;3460;3461;3462;3463;3464;3465;3466;3467;3468;8784;8785;8786;8787;8788;8789;8790;8791;8792;8793                                                                                                                                                                                                                                                                                                                                                                                                                                                                                                                                                                                                                                                                              | 1218;3458;8790     |     |  |  |  |  |  |  |  |  |  |  |
| 207 | 1   |    |    |    | 205 | 66          | TRUE                | 71             | 218                                            |                                                                                                                                                                                                                                                                                                                                                                                                                                                                                                                                                                                                                                                                                                                                                                                                                          | 638                | 638 |  |  |  |  |  |  |  |  |  |  |
| 208 | 4   |    |    |    | 206 | 17          | True;True;True;True | 84;571;638;785 | 247;1957;2199;2200;2593                        | 696;6511;7356;7357;8469                                                                                                                                                                                                                                                                                                                                                                                                                                                                                                                                                                                                                                                                                                                                                                                                  | 696;6511;7357;8469 |     |  |  |  |  |  |  |  |  |  |  |



|     | AZ | BA | BB | BC | BD  | BE      | BF                                                                              | BG                                                            | BH                                                                                     | BI                                                                                                                                                                                                                                                                                                                                                                                                                                                                                                                | BJ                                                                                  | BK  |
|-----|----|----|----|----|-----|---------|---------------------------------------------------------------------------------|---------------------------------------------------------------|----------------------------------------------------------------------------------------|-------------------------------------------------------------------------------------------------------------------------------------------------------------------------------------------------------------------------------------------------------------------------------------------------------------------------------------------------------------------------------------------------------------------------------------------------------------------------------------------------------------------|-------------------------------------------------------------------------------------|-----|
| 213 | 0  |    |    |    | 211 | 601     | TRUE                                                                            | 656                                                           | 2236                                                                                   | 7443                                                                                                                                                                                                                                                                                                                                                                                                                                                                                                              | 7443                                                                                |     |
| 214 | 78 |    |    |    | 212 | 0;815   | ue;True;True;Tr<br>ue;True;True;True<br>;True;True;True;Tr<br>ue;True;True;True | 30;39;210;237;249;<br>269;359;365;375;42<br>7;452;505;687;897 | 1179;1213;1336;1337;1<br>338;1339;1650;1798;23<br>33;2334;2335;2336;233<br>7;2927;2928 | 275;276;277;278;279;280;281;282;283;284;285;28<br>6;287;357;2022;2023;2024;2025;2026;2027;2028;2<br>029;2030;2231;2302;2303;2304;2421;2422;2423;2<br>424;2425;2426;2427;2428;2429;2430;2431;3409;3<br>410;3411;3412;3413;3414;3415;3424;3498;3841;3<br>842;3843;3844;3845;3846;3847;3848;3849;5702;6<br>410;3411;3412;3413;3414;3415;3424;3498;3841;3<br>287;357;2025;2<br>231;2302;2431;<br>064;6065;7714;7715;7716;7717;7718;7719;7720;7<br>721;7722;7723;7724;7725;7726;7727;7728;7729;9<br>488;9489;9490;9491 | 287;357;2025;2<br>231;2302;2431;<br>3413;3424;3498<br>;3845;5702;606<br>4;7716;9491 |     |
| 215 | 2  |    |    |    | 213 | 349;398 | True;True                                                                       | 382;432                                                       | 1222;1350                                                                              | 3508;3869                                                                                                                                                                                                                                                                                                                                                                                                                                                                                                         | 3508;3869                                                                           |     |
| 216 | 3  |    |    |    | 214 | 352     | TRUE                                                                            | 385                                                           | 1232                                                                                   | 3536;3537;3538                                                                                                                                                                                                                                                                                                                                                                                                                                                                                                    | 3536                                                                                |     |
| 217 | 3  |    |    |    | 215 | 586;593 | True;True                                                                       | 639;647                                                       | 2201;2211                                                                              | 7358;7359;7371                                                                                                                                                                                                                                                                                                                                                                                                                                                                                                    | 7358;7371                                                                           |     |
| 218 | 2  |    |    |    | 216 | 443     | TRUE                                                                            | 480                                                           | 1736;1737                                                                              | 5910;5911                                                                                                                                                                                                                                                                                                                                                                                                                                                                                                         | 5910                                                                                |     |
| 219 | 0  |    |    |    | 217 | 104     | TRUE                                                                            | 113                                                           | 363                                                                                    | 1091                                                                                                                                                                                                                                                                                                                                                                                                                                                                                                              | 1091                                                                                |     |
| 220 | 0  |    |    |    | 218 | 545     | TRUE                                                                            | 594                                                           | 2065                                                                                   | 6981                                                                                                                                                                                                                                                                                                                                                                                                                                                                                                              | 6981                                                                                | 146 |
| 221 | 0  |    |    |    | 219 | 591     | TRUE                                                                            | 645                                                           | 2209                                                                                   | 7368;7369                                                                                                                                                                                                                                                                                                                                                                                                                                                                                                         | 7368                                                                                | 147 |



|     | AZ  | BA | BB | BC | BD  | BE                  | BF                  | BG              | BH                  | BI                          | BJ                      | BK  |
|-----|-----|----|----|----|-----|---------------------|---------------------|-----------------|---------------------|-----------------------------|-------------------------|-----|
| 222 | 0 + |    |    |    | 220 | 633                 | TRUE                | 690             | 2346                | 7742                        | 7742                    | 148 |
| 223 | 0   |    |    |    | 221 | 587                 | TRUE                | 640             | 2202                | 7360                        | 7360                    |     |
| 224 | 8   |    |    |    | 222 | 1;223               | True;True           | 1;245           | 1;2;3;4;769;770;771 | 1;2;3;4;2288;2289;2290;2291 | 4;2291                  |     |
| 225 | 0   |    |    |    | 223 | 214                 | TRUE                | 236             | 742                 | 2230                        | 2230                    |     |
| 226 | 4   |    |    |    | 224 | 183;305;386;<br>756 | True;True;True;True | 202;331;420;827 | 646;1041;1307;2720  | 1994;2959;3691;8871         | 1994;2959;3691<br>;8871 |     |
| 227 | 0 + |    |    |    | 225 | 135;234;260         | False;True;False    | 151;256;282     | 487;798;866;867     | 1468;2341;2465;2466         | 1468;2341;2465          | 149 |
| 228 | 0   |    |    |    | 226 | 636                 | TRUE                | 693             | 2349;2350;2351      | 7745;7746;7747;7748;7749    | 7749                    |     |
| 229 | 0 + |    |    |    | 227 | 611                 | TRUE                | 667             | 2262                | 7512                        | 7512                    | 150 |

|     | AZ  | BA | BB | BC | BD  | BE                 | BF                           | BG                 | BH                            | BI                                                                                                                                                                                                                                                                                                                                                                                                 | BJ                                                                                                                                        | BK  |
|-----|-----|----|----|----|-----|--------------------|------------------------------|--------------------|-------------------------------|----------------------------------------------------------------------------------------------------------------------------------------------------------------------------------------------------------------------------------------------------------------------------------------------------------------------------------------------------------------------------------------------------|-------------------------------------------------------------------------------------------------------------------------------------------|-----|
| 230 | 8   |    |    |    | 228 | 48;209;371;388;426 | True;False;False;False;False | 53;230;405;422;463 | 1693;1694;1695                | 507;508;509;510;511;512;513;514;2191;2192;3587;3588;3589;3759;3760;3761;3762;3763;3764;3765;3766;3767;3768;3769;3770;3771;3772;3773;3774;4;725;726;1258;1259;123775;3776;3777;3778;3779;3780;3781;3782;3783;60;1315;1316;1317;1313784;3785;3786;3787;3788;3789;3790;3791;3792;8;1319;1320;1691;1692;3793;5797;5798;5799;5800;5801;5802;5803;5804;5805                                              | 508;2192;3588;3778;5800                                                                                                                   | 56  |
| 231 | 0   |    |    |    | 229 | 120                | TRUE                         | 131                | 410                           | 1232                                                                                                                                                                                                                                                                                                                                                                                               | 1232                                                                                                                                      |     |
| 232 | 0 + |    |    |    | 230 | 75                 | TRUE                         | 81                 | 244                           | 693                                                                                                                                                                                                                                                                                                                                                                                                | 693                                                                                                                                       | 151 |
| 233 | 0   |    |    |    | 231 | 728                | TRUE                         | 798                | 2642;2643;2644                | 8665;8666;8667                                                                                                                                                                                                                                                                                                                                                                                     | 8667                                                                                                                                      |     |
| 234 | 0   |    |    |    | 232 | 238                | TRUE                         | 260                | 803                           | 2350                                                                                                                                                                                                                                                                                                                                                                                               | 2350                                                                                                                                      |     |
| 235 | 1   |    |    |    | 233 | 718                | TRUE                         | 786                | 2594                          | 8470                                                                                                                                                                                                                                                                                                                                                                                               | 8470                                                                                                                                      |     |
| 236 | 75  |    |    |    | 234 | 48;808             | ;True;True;True              | 738;740;819;889    | 00;2901;2902                  | 218;219;220;221;222;223;224;225;226;227;228;229;79;80;81;82;83;84;455;456;457;748;1220;1233;15;3506;3539;3540;3541;3838;3839;5703;5815;581234;1333;1334;1651;1703;1704;1708;1709;1736;5917;6385;6386;6387;6388;6389;6390;6391;6392;6393;6394;6395;6396;6397;6398;6399;6400;6431;6435;6436;8010;8011;8012;8013;8016;8807;9364;9365;9366;9367;9368;9369;9370;9371;9372;9373;9374;9375;9376;9377;9378 | 224;1406;2244;3505;3540;38393505;3540;3839;5703;5815;5824;5914;6400;64016;436;8013;8016;8807;9364;5914;6400;6431;6436;8013;8016;8807;9365 |     |
| 237 | 7   |    |    |    | 235 | 341;440            | True;True                    | 374;477            | 1208;1209;1210;1211;1212;1730 | 3492;3493;3494;3495;3496;3497;5886                                                                                                                                                                                                                                                                                                                                                                 | 3496;5886                                                                                                                                 |     |
| 238 | 3   |    |    |    | 236 | 225;772            | True;True                    | 247;847            | 776;2768                      | 2299;9019;9020                                                                                                                                                                                                                                                                                                                                                                                     | 2299;9019                                                                                                                                 |     |

|     | AZ  | BA | BB | BC | BD  | BE                                                  | BF                                                                           | BG                                                 | BH                                                                                                                                                                                           | BI                                                                                                                                                                                                                        | BJ                                                             | BK    |
|-----|-----|----|----|----|-----|-----------------------------------------------------|------------------------------------------------------------------------------|----------------------------------------------------|----------------------------------------------------------------------------------------------------------------------------------------------------------------------------------------------|---------------------------------------------------------------------------------------------------------------------------------------------------------------------------------------------------------------------------|----------------------------------------------------------------|-------|
| 239 | 1 + |    |    |    | 237 | 5;31;70;189;<br>262;403;620;<br>713;753;783;<br>797 | False;True;False;F<br>alse;False;False;Fa<br>lse;False;False;Fal<br>se;False | 5;33;75;76;209;285<br>;437;677;780;824;8<br>60;878 | 12;111;237;238;664;665<br>;870;871;872;1361;1362<br>;1363;2291;2292;2583;2<br>5;8446;8447;8448;8449;8450;8451;8822;8823;882<br>584;2585;2707;2708;27<br>09;2710;2711;2712;280<br>5;2806;2856 | 12;13;293;685;686;2020;2021;2470;2471;2472;247<br>3;2474;2475;2476;3886;3887;3888;7581;7582;844<br>;8825;8826;8827;8828;8829;8830;8831;8832;883<br>3;8834;8835;8836;8837;8838;8839;8840;8841;884<br>2;8843;9138;9139;9266 | 12;293;685;202<br>0;2471;3886;75<br>81;8449;8828;9<br>138;9266 | 52;54 |
| 240 | 3   |    |    |    | 238 | 687                                                 | TRUE                                                                         | 751                                                | 2492;2493;2494                                                                                                                                                                               | 8114;8115;8116                                                                                                                                                                                                            | 8115                                                           |       |
| 241 | 0 + |    |    |    | 239 | 477                                                 | TRUE                                                                         | 514                                                | 1808                                                                                                                                                                                         | 6075                                                                                                                                                                                                                      | 6075                                                           |       |
| 242 | 0 + |    |    |    | 240 | 769                                                 | TRUE                                                                         | 843                                                | 2754                                                                                                                                                                                         | 8962                                                                                                                                                                                                                      | 8962                                                           | 152   |
| 243 | 15  |    |    |    | 241 | 77;276;721;7<br>57                                  | True;True;True;Tr<br>ue                                                      | 83;299;790;828                                     | 246;917;918;2612;2613;<br>2614;2615;2721                                                                                                                                                     | 695;2602;2603;2604;8553;8554;8555;8556;8557;8<br>558;8559;8560;8561;8562;8563;8872                                                                                                                                        | 695;2602;8556;<br>8872                                         |       |
| 244 | 5   |    |    |    | 242 | 135;260;427;<br>495                                 | True;True;True;Tr<br>ue                                                      | 151;282;464;536                                    | 487;866;867;1696;1862                                                                                                                                                                        | 1468;2465;2466;5806;5807;6260                                                                                                                                                                                             | 1468;2465;5807<br>;6260                                        |       |
| 245 | 6   |    |    |    | 243 | 246                                                 | TRUE                                                                         | 268                                                | 841;842                                                                                                                                                                                      | 2415;2416;2417;2418;2419;2420                                                                                                                                                                                             | 2415                                                           |       |
| 246 | 0 + |    |    |    | 244 | 588                                                 | TRUE                                                                         | 641                                                | 2203                                                                                                                                                                                         | 7361                                                                                                                                                                                                                      | 7361                                                           |       |
| 247 | 0   |    |    |    | 245 | 557                                                 | TRUE                                                                         | 606                                                | 2100                                                                                                                                                                                         | 7051                                                                                                                                                                                                                      | 7051                                                           |       |
| 248 | 0 + |    |    |    | 246 | 369                                                 | TRUE                                                                         | 403                                                | 1256                                                                                                                                                                                         | 3585                                                                                                                                                                                                                      | 3585                                                           |       |

|     | AZ  | BA | BB | BC | BD  | BE                     | BF                            | BG                     | BH                            | BI                                                         | BJ                           | BK      |
|-----|-----|----|----|----|-----|------------------------|-------------------------------|------------------------|-------------------------------|------------------------------------------------------------|------------------------------|---------|
| 249 | 0   |    |    |    | 247 | 452                    | TRUE                          | 489                    | 1752                          | 5932                                                       | 5932                         |         |
| 250 | 2   |    |    |    | 248 | 336                    | TRUE                          | 369                    | 1195;1196                     | 3469;3470                                                  | 3469                         |         |
| 251 | 0   |    |    |    | 249 | 373                    | TRUE                          | 407                    | 1262                          | 3591                                                       | 3591                         |         |
| 252 | 0   |    |    |    | 250 | 4;82                   | True;True                     | 4;89                   | 10;11;252                     | 10;11;701                                                  | 10;701                       | 153;154 |
| 253 | 8   |    |    |    | 251 | 704                    | TRUE                          | 770                    | 2546;2547;2548                | 8348;8349;8350;8351;8352;8353;8354;8355                    | 8348                         |         |
| 254 | 0   |    |    |    | 252 | 488                    | TRUE                          | 528                    | 1847                          | 6235                                                       | 6235                         |         |
| 255 | 0 + |    |    |    | 253 | 303                    | TRUE                          | 329                    | 1034                          | 2939                                                       | 2939                         |         |
| 256 | 0 + |    |    |    | 254 | 493                    | TRUE                          | 533;534                | 1859;1860                     | 6257;6258                                                  | 6257                         |         |
| 257 | 13  |    |    |    | 255 | 12;105;114;169;275;800 | True;True;True;True;True;True | 13;114;125;186;298;881 | 51;52;53;364;400;584;916;2869 | 147;148;149;150;151;152;1092;1093;1094;1220;1839;2601;9295 | 148;1092;1220;1839;2601;9295 |         |

|     | AZ  | BA | BB | BC | BD  | BE                      | BF                               | BG                                  | BH                                                                                                                              | BI                                                                                                                                                                                                                                                                                                                                                                                                           | BJ                           | BK      |
|-----|-----|----|----|----|-----|-------------------------|----------------------------------|-------------------------------------|---------------------------------------------------------------------------------------------------------------------------------|--------------------------------------------------------------------------------------------------------------------------------------------------------------------------------------------------------------------------------------------------------------------------------------------------------------------------------------------------------------------------------------------------------------|------------------------------|---------|
| 258 | 0 + |    |    |    | 256 | 474                     | TRUE                             | 511                                 | 1805                                                                                                                            | 6072                                                                                                                                                                                                                                                                                                                                                                                                         | 6072                         |         |
| 259 | 1 + |    |    |    | 257 | 109;295;682;<br>716;726 | False;False;False;F<br>alse;True | 118;319;320;321;74<br>6;783;784;796 | 370;371;1015;1016;101<br>7;1018;1019;1020;2475;<br>2476;2477;2478;2479;2<br>480;2481;2482;2588;25<br>89;2590;2591;2592;263<br>0 | 1100;1101;2913;2914;2915;2916;2917;2918;8046;<br>8047;8048;8049;8050;8051;8052;8053;8054;8055;<br>8056;8057;8058;8059;8060;8061;8062;8063;8064;<br>8065;8066;8067;8068;8069;8070;8071;8072;8073;<br>8074;8075;8076;8077;8078;8079;8080;8081;8082;<br>8083;8084;8085;8086;8087;8088;8089;8090;8091;<br>8092;8093;8094;8454;8455;8456;8457;8458;8459;<br>8460;8461;8462;8463;8464;8465;8466;8467;8468;<br>8608 | 1101;2913;8090<br>;8462;8608 |         |
| 260 | 0 + |    |    |    | 258 | 476                     | TRUE                             | 513                                 | 1807                                                                                                                            | 6074                                                                                                                                                                                                                                                                                                                                                                                                         | 6074                         |         |
| 261 | 1   |    |    |    | 259 | 646                     | TRUE                             | 704                                 | 2391                                                                                                                            | 7860                                                                                                                                                                                                                                                                                                                                                                                                         | 7860                         |         |
| 262 | 0 + |    |    |    | 260 | 92                      | TRUE                             | 101                                 | 320                                                                                                                             | 997                                                                                                                                                                                                                                                                                                                                                                                                          | 997                          | 155;156 |
| 263 | 1   |    |    |    | 261 | 348                     | TRUE                             | 381                                 | 1221                                                                                                                            | 3507                                                                                                                                                                                                                                                                                                                                                                                                         | 3507                         |         |
| 264 | 7   |    |    |    | 262 | 302;404;775             | True;True;True                   | 328;438;852                         | 1031;1032;1033;1364;2<br>787                                                                                                    | 2934;2935;2936;2937;2938;3889;9070                                                                                                                                                                                                                                                                                                                                                                           | 2937;3889;9070               |         |
| 265 | 0 + |    |    |    | 263 | 605                     | TRUE                             | 661                                 | 2248                                                                                                                            | 7477                                                                                                                                                                                                                                                                                                                                                                                                         | 7477                         | 157     |

|     | AZ  | BA | BB | BC | BD  | BE  | BF   | BG  | BH             | BI                            | BJ   | BK      |
|-----|-----|----|----|----|-----|-----|------|-----|----------------|-------------------------------|------|---------|
| 266 | 0   |    |    |    | 264 | 512 | TRUE | 554 | 1908;1909      | 6382;6383                     | 6382 | 158     |
| 267 | 0 + |    |    |    | 265 | 671 | TRUE | 731 | 2443           | 7997                          | 7997 | 159     |
| 268 | 0 + |    |    |    | 266 | 654 | TRUE | 713 | 2407           | 7936                          | 7936 |         |
| 269 | 0   |    |    |    | 267 | 590 | TRUE | 644 | 2208           | 7367                          | 7367 |         |
| 270 | 0   |    |    |    | 268 | 254 | TRUE | 276 | 857            | 2450                          | 2450 | 160     |
| 271 | 0   |    |    |    | 269 | 821 | TRUE | 904 | 2956;2957;2958 | 9583;9584;9585                | 9585 | 161;162 |
| 272 | 0 + |    |    |    | 270 | 55  | TRUE | 60  | 192            | 545                           | 545  |         |
| 273 | 0   |    |    |    | 271 | 177 | TRUE | 196 | 631;632        | 1969;1970                     | 1969 |         |
| 274 | 0 + |    |    |    | 272 | 606 | TRUE | 662 | 2249           | 7478                          | 7478 |         |
| 275 | 6   |    |    |    | 273 | 212 | TRUE | 234 | 737;738        | 2219;2220;2221;2222;2223;2224 | 2222 |         |

|     | AZ  | BA | BB | BC | BD  | BE      | BF        | BG      | BH             | BI                       | BJ        | BK  |
|-----|-----|----|----|----|-----|---------|-----------|---------|----------------|--------------------------|-----------|-----|
| 276 | 0 + |    |    |    | 274 | 733     | TRUE      | 804     | 2663           | 8731                     | 8731      |     |
| 277 | 0   |    |    |    | 275 | 100     | TRUE      | 109     | 356            | 1064                     | 1064      | 163 |
| 278 | 3   |    |    |    | 276 | 362;744 | True;True | 396;815 | 1248;2687;2688 | 3572;8794;8795           | 3572;8794 |     |
| 279 | 1   |    |    |    | 277 | 211     | TRUE      | 233     | 736            | 2218                     | 2218      |     |
| 280 | 2   |    |    |    | 278 | 334     | TRUE      | 367     | 1190;1191      | 3455;3456                | 3455      |     |
| 281 | 3   |    |    |    | 279 | 107;312 | True;True | 116;339 | 367;368;1058   | 1097;1098;2996           | 1098;2996 |     |
| 282 | 2   |    |    |    | 280 | 16      | TRUE      | 17      | 60;61          | 162;163                  | 163       |     |
| 283 | 0 + |    |    |    | 281 | 60      | TRUE      | 65      | 201            | 556                      | 556       |     |
| 284 | 0 + |    |    |    | 282 | 634     | TRUE      | 691     | 2347           | 7743                     | 7743      | 164 |
| 285 | 5   |    |    |    | 283 | 213     | TRUE      | 235     | 739;740;741    | 2225;2226;2227;2228;2229 | 2225      |     |
| 286 | 0 + |    |    |    | 284 | 735     | TRUE      | 806     | 2666           | 8734                     | 8734      |     |

|     | AZ | BA | BB | BC | BD  | BE         | BF             | BG         | BH                               | BI                                                                                                                                                      | BJ            | BK  |
|-----|----|----|----|----|-----|------------|----------------|------------|----------------------------------|---------------------------------------------------------------------------------------------------------------------------------------------------------|---------------|-----|
| 287 | 1  |    |    |    | 285 | 484        | TRUE           | 522        | 1828                             | 6163                                                                                                                                                    | 6163          |     |
| 288 | 0  |    |    |    | 286 | 540        | TRUE           | 589        | 2056;2057                        | 6964;6965;6966                                                                                                                                          | 6966          |     |
| 289 | 0  |    |    |    | 287 | 635        | TRUE           | 692        | 2348                             | 7744                                                                                                                                                    | 7744          |     |
| 290 | 0  |    |    |    | 288 | 359        | TRUE           | 392;393    | 1243;1244;1245                   | 3566;3567;3568;3569                                                                                                                                     | 3567          |     |
| 291 | 32 |    |    |    | 289 | 17;103;453 | True;True;True | 18;112;490 | 62;63;64;65;359;360;361;362;1753 | 164;165;166;167;168;169;170;171;1068;1069;1070;1071;1072;1073;1074;1075;1076;1077;1078;1079;1080;1081;1082;1083;1084;1085;1086;1087;1088;1089;1090;5933 | 168;1072;5933 |     |
| 292 | 0  |    |    |    | 290 | 249        | TRUE           | 271        | 849                              | 2434                                                                                                                                                    | 2434          |     |
| 293 | 0  |    |    |    | 291 | 367        | TRUE           | 401        | 1253                             | 3578;3579;3580                                                                                                                                          | 3579          |     |
| 294 | 0  |    |    |    | 292 | 496        | TRUE           | 537        | 1863                             | 6261                                                                                                                                                    | 6261          | 165 |
| 295 | 1  |    |    |    | 293 | 470        | TRUE           | 507        | 1801                             | 6068                                                                                                                                                    | 6068          |     |
| 296 | 1  |    |    |    | 294 | 730        | TRUE           | 800        | 2649                             | 8678                                                                                                                                                    | 8678          |     |



|     | AZ | BA | BB | BC | BD  | BE  | BF                                     | BG                             | BH                              | BI                                                                                                                                                                                                                                                                                                                                                                                                                                      | BJ                                        | BK   |     |
|-----|----|----|----|----|-----|-----|----------------------------------------|--------------------------------|---------------------------------|-----------------------------------------------------------------------------------------------------------------------------------------------------------------------------------------------------------------------------------------------------------------------------------------------------------------------------------------------------------------------------------------------------------------------------------------|-------------------------------------------|------|-----|
| 297 | 0  |    |    |    | 295 | 825 | TRUE                                   | 908;909                        |                                 | 9608;9609;9610;9611;9612;9613;9614;9615;9616;<br>9617;9618;9619;9620;9621;9622;9623;9624;9625;<br>9626;9627;9628;9629;9630;9631;9632;9633;9634;<br>9635;9636;9637;9638;9639;9640;9641;9642;9643;<br>9644;9645;9646;9647;9648;9649;9650;9651;9652;<br>2968;2969;2970;2971;2<br>9653;9654;9655;9656;9657;9658;9659;9660;9661;<br>972;2973;2974;2975;29<br>9662;9663;9664;9665;9666;9667;9668;9669;9670;<br>76;2977;2978;2979<br>9671;9672 | 9609                                      |      |     |
| 298 | 2  |    |    |    | 296 | 195 | TRUE                                   |                                | 215                             | 680                                                                                                                                                                                                                                                                                                                                                                                                                                     | 2064;2065                                 | 2064 |     |
| 299 | 1  |    |    |    | 297 | 481 | TRUE                                   |                                | 518                             | 1812                                                                                                                                                                                                                                                                                                                                                                                                                                    | 6079                                      | 6079 |     |
| 300 | 0  |    |    |    | 298 | 661 | TRUE                                   |                                | 721                             | 2423                                                                                                                                                                                                                                                                                                                                                                                                                                    | 7964                                      | 7964 | 166 |
| 301 | 2  |    |    |    | 299 | 2   | TRUE                                   |                                | 2 5;6                           | 5;6                                                                                                                                                                                                                                                                                                                                                                                                                                     |                                           | 6    |     |
| 302 | 0  |    |    |    | 300 | 689 | TRUE                                   |                                | 753                             | 2496                                                                                                                                                                                                                                                                                                                                                                                                                                    | 8118                                      | 8118 |     |
| 303 | 1  |    |    |    | 301 | 350 | TRUE                                   |                                | 383                             | 1223                                                                                                                                                                                                                                                                                                                                                                                                                                    | 3509                                      | 3509 |     |
| 304 | 0  |    |    |    | 302 | 792 | TRUE                                   |                                | 872                             | 2841                                                                                                                                                                                                                                                                                                                                                                                                                                    | 9243                                      | 9243 |     |
| 305 | 50 |    |    |    | 303 | 34  | True;True;True;Tr<br>ue;True;True;True | 28;275;306;341;500<br>;569;805 | 42;1943;1944;1945;266<br>4;2665 | 99;100;101;853;854;855<br>268;269;270;2438;2439;2440;2441;2442;2443;244<br>;856;933;934;1062;1063<br>4;2445;2446;2447;2448;2449;2635;2636;3001;300<br>2;3003;3004;3005;3006;3007;6030;6031;6032;603<br>786;1787;1788;1789;19<br>3;6034;6035;6036;6037;6038;6039;6040;6041;604<br>2;6043;6044;6452;6453;6454;6455;6456;6457;645<br>8;6459;6460;6461;6462;8732;8733                                                                       | 270;2446;2635;<br>3006;6030;6458<br>;8733 |      |     |
| 306 | 1  |    |    |    | 304 | 328 | TRUE                                   |                                | 361                             | 1174                                                                                                                                                                                                                                                                                                                                                                                                                                    | 3417                                      | 3417 |     |

|     | AZ  | BA | BB | BC | BD  | BE                          | BF                                | BG                          | BH                              | BI                                 | BJ                                    | BK      |
|-----|-----|----|----|----|-----|-----------------------------|-----------------------------------|-----------------------------|---------------------------------|------------------------------------|---------------------------------------|---------|
| 307 | 3   |    |    |    | 305 | 405;456;723                 | True;True;True                    | 439;493;792                 | 1365;1762;2617                  | 3890;5967;8565;8566                | 3890;5967;8566                        |         |
| 308 | 0   |    |    |    | 306 | 441                         | TRUE                              | 478                         | 1731                            | 5887                               | 5887                                  | 167     |
| 309 | 7   |    |    |    | 307 | 203;571                     | True;True                         | 223;621                     | 704;705;706;2139                | 2130;2131;2132;2133;2134;2135;7146 | 2132;7146                             |         |
| 310 | 0 + |    |    |    | 308 | 607                         | TRUE                              | 663                         | 2250                            | 7479                               | 7479                                  | 168     |
| 311 | 5   |    |    |    | 309 | 150;178;319;<br>401;406;705 | True;True;True;Tr<br>ue;True;True | 166;197;352;435;44<br>0;771 | 536;633;1154;1354;136<br>6;2549 | 1720;1971;3372;3874;3891;8356      | 1720;1971;3372<br>;3874;3891;835<br>6 |         |
| 312 | 0   |    |    |    | 310 | 619                         | TRUE                              | 676                         | 2290                            | 7580                               | 7580                                  |         |
| 313 | 0   |    |    |    | 311 | 779                         | TRUE                              | 856                         | 2792                            | 9078;9079                          | 9078                                  |         |
| 314 | 1   |    |    |    | 312 | 412                         | TRUE                              | 448                         | 1636                            | 5636                               | 5636                                  |         |
| 315 | 0   |    |    |    | 313 | 697                         | TRUE                              | 761                         | 2512                            | 8143                               | 8143                                  | 169     |
| 316 | 0   |    |    |    | 314 | 74                          | TRUE                              | 80                          | 243                             | 692                                | 692                                   | 170;171 |
| 317 | 3   |    |    |    | 315 | 377                         | TRUE                              | 411                         | 1275;1276                       | 3618;3619;3620                     | 3618                                  |         |

|     | AZ  | BA | BB | BC | BD  | BE    | BF        | BG      | BH                                      | BI                                           | BJ       | BK  |
|-----|-----|----|----|----|-----|-------|-----------|---------|-----------------------------------------|----------------------------------------------|----------|-----|
| 318 | 5   |    |    |    | 316 | 9;670 | True;True | 10;730  | 43;44;45;2442                           | 138;139;140;141;7996                         | 141;7996 |     |
| 319 | 0 + |    |    |    | 317 | 394   | TRUE      | 428     | 1340                                    | 3850                                         | 3850     | 172 |
| 320 | 5   |    |    |    | 318 | 384   | TRUE      | 418     | 1298;1299;1300                          | 3667;3668;3669;3670;3671                     | 3667     |     |
| 321 | 0   |    |    |    | 319 | 411   | TRUE      | 446;447 | 1628;1629;1630;1631;1632;1633;1634;1635 | 5627;5628;5629;5630;5631;5632;5633;5634;5635 | 5627     |     |
| 322 | 0 + |    |    |    | 320 | 366   | TRUE      | 400     | 1252                                    | 3577                                         | 3577     | 173 |
| 323 | 0 + | +  |    |    | 321 | 374   | TRUE      | 408     | 1263                                    | 3592                                         | 3592     |     |
| 324 | 0 + | +  |    |    | 322 | 511   | TRUE      | 553     | 1907                                    | 6381                                         | 6381     | 174 |

|     | AZ  | BA | BB | BC | BD  | BE      | BF        | BG      | BH        | BI        | BJ   | BK        |     |
|-----|-----|----|----|----|-----|---------|-----------|---------|-----------|-----------|------|-----------|-----|
| 325 | 0 + | +  |    |    | 323 | 72      | TRUE      | 78      | 240       |           | 688  | 688       | 175 |
| 326 | 2   | +  |    |    | 324 | 325;793 | True;True | 358;873 | 1168;2842 | 3408;9244 |      | 3408;9244 |     |
| 327 | 0 + | +  |    |    | 325 | 255     | TRUE      | 277     | 858       |           | 2451 | 2451      | 176 |
| 328 | 0 + | +  |    |    | 326 | 669     | TRUE      | 729     | 2441      |           | 7995 | 7995      |     |
| 329 | 0 + | +  |    |    | 327 | 472     | TRUE      | 509     | 1803      |           | 6070 | 6070      |     |
| 330 | 0 + | +  |    |    | 328 | 592     | TRUE      | 646     | 2210      |           | 7370 | 7370      |     |

|     | AZ  | BA | BB | BC | BD  | BE  | BF   | BG  | BH   | BI        | BJ   | BK   |     |
|-----|-----|----|----|----|-----|-----|------|-----|------|-----------|------|------|-----|
| 331 | 0 + |    | +  |    | 329 | 21  | TRUE | 23  | 85   |           | 234  | 234  | 177 |
| 332 | 0   |    | +  |    | 330 | 768 | TRUE | 842 | 2753 |           | 8961 | 8961 | 178 |
| 333 | 2   |    | +  |    | 331 | 789 | TRUE | 869 | 2838 | 9239;9240 |      | 9239 |     |
| 334 | 0 + |    | +  |    | 332 | 515 | TRUE | 557 | 1915 |           | 6401 | 6401 |     |
| 335 | 1   |    | +  |    | 333 | 584 | TRUE | 637 | 2198 |           | 7355 | 7355 |     |

|     | AZ  | BA | BB | BC | BD  | BE  | BF   | BG  | BH              | BI                  | BJ   | BK       |
|-----|-----|----|----|----|-----|-----|------|-----|-----------------|---------------------|------|----------|
| 336 | 1   |    | +  |    | 334 | 576 | TRUE | 628 | 2175            |                     | 7291 | 7291     |
| 337 | 0 + |    | +  |    | 335 | 655 | TRUE | 714 | 2408            |                     | 7937 | 7937 179 |
| 338 | 1   |    | +  |    | 336 | 306 | TRUE | 332 | 1042            |                     | 2960 | 2960     |
| 339 | 0 + |    | +  |    | 337 | 475 | TRUE | 512 | 1806            |                     | 6073 | 6073     |
| 340 | 0 + |    | +  |    | 338 | 181 | TRUE | 200 | 639;640;641;642 | 1985;1986;1987;1988 |      | 1986     |
| 341 | 0 + |    | +  |    | 339 | 577 | TRUE | 629 | 2176            |                     | 7292 | 7292     |

|     | AZ  | BA | BB | BC | BD  | BE  | BF   | BG  | BH   | BI | BJ   | BK   |     |
|-----|-----|----|----|----|-----|-----|------|-----|------|----|------|------|-----|
| 342 | 0 + |    | +  |    | 340 | 52  | TRUE | 57  | 184  |    | 528  | 528  | 180 |
| 343 | 0 + |    | +  |    | 341 | 596 | TRUE | 651 | 2215 |    | 7376 | 7376 | 181 |
| 344 | 1   |    | +  |    | 342 | 826 | TRUE | 910 | 2980 |    | 9673 | 9673 |     |
| 345 | 0   |    | +  |    | 343 | 136 | TRUE | 152 | 488  |    | 1469 | 1469 |     |
| 346 | 1   |    | +  |    | 344 | 179 | TRUE | 198 | 634  |    | 1972 | 1972 |     |
| 347 | 1   |    | +  |    | 345 | 747 | TRUE | 818 | 2695 |    | 8806 | 8806 |     |
| 348 | 1   |    | +  |    | 346 | 640 | TRUE | 698 | 2360 |    | 7786 | 7786 |     |

|     | AZ | BA | BB | BC | BD  | BE | BF   | BG | BH  | BI | BJ  | BK  |
|-----|----|----|----|----|-----|----|------|----|-----|----|-----|-----|
| 349 | 0  |    | +  |    | 347 | 38 | TRUE | 40 | 129 |    | 358 | 358 |



|   | BL                        | BM           | BN                     | BO                                 | BP                              | BQ                 | BR                           |
|---|---------------------------|--------------|------------------------|------------------------------------|---------------------------------|--------------------|------------------------------|
| 1 | Deamidation (NQ) site IDs | NEM site IDs | Oxidation (M) site IDs | Carbamidomethyl (C) site positions | Deamidation (NQ) site positions | NEM site positions | Oxidation (M) site positions |
| 2 |                           |              | 0;1                    |                                    |                                 |                    | 26;33                        |
| 3 | 0;132;133                 |              |                        |                                    | 37;43;44                        |                    |                              |
| 4 |                           |              |                        |                                    |                                 |                    |                              |
| 5 | 1;2                       |              | 2;3                    | 102;104;107;109;138                | 192;201                         |                    | 186;235                      |

|   | BL  | BM | BN | BO  | BP | BQ  | BR  |
|---|-----|----|----|-----|----|-----|-----|
| 6 |     | 0  |    |     |    | 537 |     |
| 7 | 134 | 1  |    |     | 47 | 43  |     |
| 8 | 3   | 2  | 4  | 202 | 25 | 202 | 186 |
| 9 | 4   | 3  |    |     | 36 | 25  |     |

|    | BL | BM | BN | BO | BP | BQ | BR |
|----|----|----|----|----|----|----|----|
| 10 |    |    |    |    |    |    |    |
| 11 |    |    |    |    |    |    |    |
| 12 |    |    |    | 41 |    |    |    |

|    | BL        | BM | BN      | BO                  | BP              | BQ  | BR              |
|----|-----------|----|---------|---------------------|-----------------|-----|-----------------|
| 13 | 5;6;7;135 |    | 5;6;7;8 | 108;114;117;255;313 | 105;106;272;281 |     | 202;246;256;294 |
| 14 | 136       | 4  | 9       |                     | 181             | 190 | 179             |
| 15 |           |    |         |                     |                 |     |                 |

|    | BL    | BM | BN | BO | BP          | BQ  | BR |
|----|-------|----|----|----|-------------|-----|----|
| 16 | 8;137 | 5  |    |    | 132;134     | 138 |    |
| 17 |       |    |    |    | 5           |     |    |
| 18 | 9;138 |    |    |    | 236 238;241 |     |    |
| 19 |       |    |    |    |             |     |    |

|    | BL            | BM | BN | BO | BP              | BQ | BR   |
|----|---------------|----|----|----|-----------------|----|------|
| 20 | 10;11;139;140 |    |    |    | 241;248;254;256 |    |      |
| 21 |               |    |    |    |                 |    |      |
| 22 | 141;142       |    | 10 |    | 1051;1053       |    | 1056 |
| 23 |               |    |    |    |                 |    |      |
| 24 |               |    |    |    | 50              |    |      |

|    | BL         | BM | BN | BO | BP             | BQ  | BR  |
|----|------------|----|----|----|----------------|-----|-----|
| 25 | 12;143;144 |    | 11 |    | 716;717;718    |     | 726 |
| 26 | 13;14;15   |    |    |    | 1182;1183;1187 |     |     |
| 27 | 16;17;18   | 6  |    |    | 649;653;655    | 656 |     |
| 28 |            |    |    |    |                |     |     |
| 29 |            |    |    |    |                |     |     |

|    | BL                 | BM | BN    | BO        | BP          | BQ | BR      |
|----|--------------------|----|-------|-----------|-------------|----|---------|
| 30 | 19                 |    |       | 1076;1079 | 1085        |    |         |
| 31 |                    |    | 12;13 |           | 13          |    | 4;9     |
| 32 | 20;145;146;1<br>47 |    |       |           | 13;15;17;27 |    |         |
| 33 | 21;148             |    | 14;15 |           | 181;182     |    | 185;186 |



|    | BL        | BM | BN | BO | BP          | BQ  | BR  |
|----|-----------|----|----|----|-------------|-----|-----|
| 34 | 22;23;149 |    | 16 |    | 206;210;216 |     | 208 |
| 35 |           | 7  | 17 | 36 |             | 42  | 39  |
| 36 | 24        | 8  |    |    | 601         | 613 |     |
| 37 | 25;150    |    |    |    | 777 778;782 |     |     |
| 38 |           |    |    |    |             |     |     |

|    | BL      | BM | BN    | BO | BP    | BQ | BR   |
|----|---------|----|-------|----|-------|----|------|
| 39 |         |    |       |    |       |    |      |
| 40 | 151;152 |    | 18;19 |    | 7;14  |    | 1;18 |
| 41 | 26;153  |    | 9     |    | 68;76 |    | 65   |
| 42 |         |    |       |    |       |    |      |
| 43 | 154     | 10 |       |    | 795   |    | 790  |

|    | BL     | BM | BN | BO        | BP        | BQ   | BR |
|----|--------|----|----|-----------|-----------|------|----|
| 44 | 27     | 11 |    |           | 3395      | 3398 |    |
| 45 | 155    |    |    |           | 66        |      |    |
| 46 | 156    |    |    | 221       | 213       |      |    |
| 47 | 28;157 |    |    | 2069;2070 | 2065;2066 |      |    |
| 48 |        |    |    |           |           |      |    |
| 49 |        | 12 |    |           |           | 232  |    |

|    | BL    | BM | BN | BO | BP      | BQ | BR |
|----|-------|----|----|----|---------|----|----|
| 50 | 29    |    |    |    | 142     |    |    |
| 51 | 30    |    |    |    | 47      |    |    |
| 52 |       |    |    |    |         |    |    |
| 53 | 31;32 |    |    |    | 670;674 |    |    |
| 54 |       |    | 20 | 11 |         |    | 1  |

|    | BL         | BM | BN | BO      | BP       | BQ | BR |
|----|------------|----|----|---------|----------|----|----|
| 55 | 33;34      |    |    |         | 65 59;68 |    |    |
| 56 |            |    |    |         |          |    |    |
| 57 | 35;158;159 |    |    | 19;30   | 18;22;28 |    |    |
| 58 | 36;160     |    |    | 457;470 | 461;464  |    |    |

|    | BL     | BM | BN | BO  | BP      | BQ  | BR  |
|----|--------|----|----|-----|---------|-----|-----|
| 59 |        |    | 21 | 186 |         |     | 185 |
| 60 |        |    |    | 16  |         |     |     |
| 61 | 37     | 13 | 22 |     | 234     | 237 | 233 |
| 62 | 38;161 |    |    |     | 406;410 |     |     |
| 63 |        |    |    |     |         |     |     |

|    | BL     | BM | BN | BO      | BP        | BQ | BR  |
|----|--------|----|----|---------|-----------|----|-----|
| 64 | 39;162 |    |    |         | 366;371   |    |     |
| 65 | 40     | 14 | 23 | 11      | 12        | 4  | 1   |
| 66 |        |    | 24 |         |           |    | 425 |
| 67 |        |    |    | 600;604 |           |    |     |
| 68 | 41;42  |    |    | 7086    | 7066;7067 |    |     |

|    | BL        | BM | BN | BO | BP       | BQ | BR  |
|----|-----------|----|----|----|----------|----|-----|
| 69 |           |    |    |    |          |    |     |
| 70 | 163;164   |    |    |    | 215;216  |    |     |
| 71 | 43;44;165 |    | 25 |    | 89;92;93 |    | 88  |
| 72 |           |    | 26 |    |          |    | 219 |
| 73 |           | 15 |    |    |          | 77 |     |
| 74 |           |    |    |    |          |    |     |



|    | BL  | BM    | BN | BO    | BP  | BQ    | BR  |
|----|-----|-------|----|-------|-----|-------|-----|
| 75 |     |       |    | 29;33 |     |       |     |
| 76 | 45  |       | 27 |       | 138 |       | 141 |
| 77 |     | 16    |    | 23    |     | 17    |     |
| 78 | 46  |       | 28 |       | 101 |       | 113 |
| 79 |     |       |    |       |     |       |     |
| 80 | 166 |       |    |       | 193 |       |     |
| 81 |     | 17;18 |    |       |     | 13;14 |     |

|    | BL      | BM | BN | BO    | BP      | BQ | BR  |
|----|---------|----|----|-------|---------|----|-----|
| 82 |         |    |    |       |         |    |     |
| 83 | 167;168 |    |    |       | 68;72   |    |     |
| 84 |         |    |    |       |         |    |     |
| 85 | 47;169  |    |    |       | 157;158 |    |     |
| 86 |         |    |    |       |         |    |     |
| 87 |         |    |    |       |         |    |     |
| 88 |         |    | 29 |       |         |    | 668 |
| 89 |         |    |    | 13;14 |         |    |     |
| 90 | 48      |    |    |       | 209     |    |     |

|    | BL                               | BM       | BN | BO           | BP                              | BQ              | BR          |
|----|----------------------------------|----------|----|--------------|---------------------------------|-----------------|-------------|
| 91 | 170                              |          |    | 341          | 342                             |                 |             |
| 92 |                                  |          | 30 | 73;77;91;120 |                                 |                 | 90          |
| 93 | 49;50;51;52;53;54;55;171;172;173 |          | 31 | 0;218        | 117;124;145;156;170;219;225;226 | 62;69;71;83;85; | 94          |
| 94 |                                  | 32;33;34 |    | 18;367;389   |                                 |                 | 237;272;391 |

|    | BL | BM | BN | BO     | BP | BQ | BR  |
|----|----|----|----|--------|----|----|-----|
| 95 |    |    | 35 | 77;474 |    |    | 279 |
| 96 | 56 |    |    |        | 62 |    |     |
| 97 |    |    | 36 |        |    |    | 135 |
| 98 |    |    | 37 | 36;40  |    |    | 26  |

|     | BL | BM    | BN | BO     | BP | BQ | BR   |
|-----|----|-------|----|--------|----|----|------|
| 99  |    |       | 38 |        |    |    | 185  |
| 100 |    |       | 39 | 88     |    |    | 95   |
| 101 |    | 40;41 |    | 66;160 |    |    | 7;24 |

|     | BL           | BM | BN       | BO                                                                                                                                              | BP             | BQ | BR          |
|-----|--------------|----|----------|-------------------------------------------------------------------------------------------------------------------------------------------------|----------------|----|-------------|
| 102 | 57;58;174;17 |    | 42;43;44 | 58;77;86;99;114;115;<br>125;147;191;192;<br>200;268;269;276;288;<br>301;302;312;339;<br>383;384;392;471;484;<br>499;500;510;537;<br>581;582;590 | 185;189;290;29 |    | 111;469;571 |
| 103 |              |    |          | 35 77;474                                                                                                                                       |                |    | 279         |

|     | BL                 | BM | BN          | BO     | BP                      | BQ | BR              |
|-----|--------------------|----|-------------|--------|-------------------------|----|-----------------|
| 104 | 59;60;61;62;63;176 |    | 45;46;47;48 |        | 188;206;236;237;279;282 |    | 259;262;296;469 |
| 105 |                    |    |             |        |                         |    |                 |
| 106 |                    |    | 49;50;51;52 | 18;369 |                         |    | 239;274;353;370 |

|     | BL                 | BM | BN          | BO               | BP | BQ                      | BR              |
|-----|--------------------|----|-------------|------------------|----|-------------------------|-----------------|
| 107 | 48;64;65;66;67;177 |    |             | 53 25;66;401;427 |    | 212;240;253;353;354;357 | 271             |
| 108 |                    |    | 35;54;55;56 | 55;407;479       |    |                         | 274;284;297;303 |
| 109 |                    |    |             |                  |    |                         |                 |
| 110 |                    |    |             |                  |    |                         |                 |



|     | BL       | BM | BN                       | BO      | BP          | BQ | BR                                  |
|-----|----------|----|--------------------------|---------|-------------|----|-------------------------------------|
| 111 | 68;69;70 |    | 57;58;59;60<br>;61;62;63 | 406;432 | 178;179;258 |    | 157;245;269;<br>276;286;326;<br>411 |

|     | BL      | BM | BN       | BO         | BP      | BQ | BR          |
|-----|---------|----|----------|------------|---------|----|-------------|
| 112 | 176     |    | 64;65;66 | 3;7;42;495 | 210     |    | 300;343;473 |
| 113 |         |    | 65       | 44;88;494  |         |    | 472         |
| 114 |         |    | 33       |            | 358     |    | 360         |
| 115 | 71;72   |    |          | 156;215    | 148;150 |    |             |
| 116 | 178     |    |          |            | 207     |    |             |
| 117 |         |    |          |            | 191     |    |             |
| 118 |         |    |          |            |         |    |             |
| 119 | 176;179 |    |          |            | 190;362 |    |             |
| 120 |         |    |          |            |         |    |             |

|     | BL | BM | BN    | BO | BP  | BQ  | BR    |
|-----|----|----|-------|----|-----|-----|-------|
| 121 |    | 19 |       |    |     | 214 |       |
| 122 |    | 20 | 67    |    |     | 6   | 1     |
| 123 | 73 |    |       |    | 405 |     |       |
| 124 |    | 21 |       |    |     | 44  |       |
| 125 | 74 |    | 68;69 |    | 39  |     | 32;33 |
| 126 |    |    | 70    |    |     |     | 364   |

|     | BL          | BM | BN | BO       | BP  | BQ  | BR  |
|-----|-------------|----|----|----------|-----|-----|-----|
| 127 |             |    | 71 |          |     |     | 752 |
| 128 |             |    |    |          |     |     |     |
| 129 |             |    |    |          |     |     |     |
| 130 |             | 22 |    |          |     | 128 |     |
| 131 | 75          |    |    | 119      | 104 |     |     |
| 132 | 180;181;182 |    |    | 11;18;20 |     |     |     |

|     | BL      | BM | BN      | BO | BP   | BQ   | BR  |
|-----|---------|----|---------|----|------|------|-----|
| 133 |         |    | 72      |    |      |      | 108 |
| 134 |         |    | 675;680 |    |      |      |     |
| 135 | 76      |    |         |    | 281  |      |     |
| 136 |         |    |         |    |      |      |     |
| 137 | 183;184 |    |         |    | 4;10 |      |     |
| 138 | 77      | 23 |         |    | 1403 | 1396 |     |

|     | BL  | BM    | BN | BO | BP  | BQ | BR      |
|-----|-----|-------|----|----|-----|----|---------|
| 139 |     |       |    |    |     |    |         |
| 140 |     |       |    |    |     |    |         |
| 141 |     |       | 73 |    |     |    | 53      |
| 142 | 185 | 74;75 |    |    | 686 |    | 688;689 |
| 143 |     |       |    |    |     |    |         |

|     | BL    | BM | BN | BO  | BP    | BQ  | BR  |
|-----|-------|----|----|-----|-------|-----|-----|
| 144 | 78    |    | 35 | 452 | 307   |     | 257 |
| 145 |       |    |    |     |       |     |     |
| 146 | 186   | 24 |    |     | 611   | 612 |     |
| 147 |       |    |    |     |       |     |     |
| 148 |       |    |    |     |       |     |     |
| 149 |       |    |    |     |       |     |     |
| 150 | 79;80 |    | 76 | 96  | 87;90 |     | 83  |

|     | BL         | BM       | BN | BO          | BP          | BQ          | BR  |
|-----|------------|----------|----|-------------|-------------|-------------|-----|
| 151 | 187        | 25       |    |             | 529         | 528         |     |
| 152 |            |          | 77 | 326         |             |             | 334 |
| 153 |            |          |    |             |             |             |     |
| 154 |            |          | 78 |             |             |             | 1   |
| 155 | 81;188;189 | 26;27;28 |    | 384;390;393 | 383;391;392 | 387;390;393 | 3   |



|     | BL                                                          | BM | BN | BO  | BP                                                          | BQ | BR |
|-----|-------------------------------------------------------------|----|----|-----|-------------------------------------------------------------|----|----|
| 156 |                                                             |    |    |     |                                                             |    |    |
| 157 | 82;190                                                      |    |    |     | 713;714                                                     |    |    |
| 158 | 191;192;193;<br>194;195;196;<br>197;198;199;<br>200;201;202 |    |    |     | 968;969;977;97<br>8;979;980;981;<br>982;983;984;98<br>5;986 |    |    |
| 159 | 203                                                         |    |    | 420 | 423                                                         |    |    |
| 160 | 204                                                         |    | 79 |     | 80                                                          |    | 85 |

|     | BL       | BM | BN | BO | BP | BQ          | BR  |
|-----|----------|----|----|----|----|-------------|-----|
| 161 | 83;205   |    |    |    |    | 312;315     |     |
| 162 | 84;85;86 |    |    |    |    | 204;206;210 |     |
| 163 | 206      |    | 80 |    |    | 3           | 8   |
| 164 | 87       |    |    |    |    | 627         |     |
| 165 |          | 29 | 81 |    |    | 456         | 441 |
| 166 |          | 30 |    |    |    | 364         |     |
| 167 |          |    |    |    |    |             |     |
| 168 |          |    |    |    |    |             |     |

|     | BL                      | BM | BN  | BO                         | BP                    | BQ | BR      |
|-----|-------------------------|----|-----|----------------------------|-----------------------|----|---------|
| 169 | 88;89;90;91;2<br>07;208 |    |     | 82 27;87                   | 30;49;50;54;59;<br>83 |    | 68      |
| 170 | 1;2                     |    | 2;3 | 82;102;104;107;109<br>;138 | 192;201               |    | 186;235 |

|     | BL | BM | BN | BO  | BP | BQ  | BR  |
|-----|----|----|----|-----|----|-----|-----|
| 171 |    | 31 |    | 347 |    | 347 |     |
| 172 |    |    |    |     |    |     |     |
| 173 |    |    | 83 |     |    |     | 251 |
| 174 |    |    |    |     |    |     |     |
| 175 |    |    | 84 |     |    |     | 155 |

|     | BL | BM | BN    | BO   | BP  | BQ | BR    |
|-----|----|----|-------|------|-----|----|-------|
| 176 | 92 |    |       | 93   | 246 |    |       |
| 177 |    |    |       |      |     |    |       |
| 178 |    |    | 85;86 |      |     |    | 60;63 |
| 179 |    |    | 87    | 1009 |     |    | 1007  |
| 180 |    |    |       |      |     |    |       |

|     | BL | BM       | BN         | BO | BP | BQ          | BR  |
|-----|----|----------|------------|----|----|-------------|-----|
| 181 |    |          |            |    |    |             |     |
| 182 |    |          |            |    |    |             |     |
| 183 |    |          |            |    |    |             |     |
| 184 |    | 93 32;33 |            |    |    | 151 141;145 |     |
| 185 |    |          |            |    |    |             |     |
| 186 |    |          | 88 133;135 |    |    |             | 125 |
| 187 |    |          |            |    |    |             |     |

|     | BL | BM | BN | BO  | BP | BQ | BR  |
|-----|----|----|----|-----|----|----|-----|
| 188 |    |    | 89 |     |    |    | 347 |
| 189 |    |    |    |     |    |    |     |
| 190 |    |    | 90 |     |    |    | 279 |
| 191 |    |    |    | 269 |    |    |     |

|     | BL  | BM | BN | BO                                                  | BP  | BQ  | BR  |
|-----|-----|----|----|-----------------------------------------------------|-----|-----|-----|
| 192 |     |    |    | 162                                                 |     |     |     |
| 193 |     |    |    | 317;318;477;478;485;<br>486;492;493;499;<br>552;553 |     |     |     |
| 194 |     |    |    |                                                     |     |     |     |
| 195 |     | 34 | 91 |                                                     |     | 301 | 300 |
| 196 |     |    | 92 |                                                     |     |     | 97  |
| 197 | 209 | 35 |    |                                                     | 277 | 283 |     |
| 198 |     |    |    |                                                     |     |     |     |



|     | BL      | BM    | BN       | BO   | BP        | BQ     | BR          |
|-----|---------|-------|----------|------|-----------|--------|-------------|
| 199 |         | 36;37 | 93;94;95 | 49   |           | 49;152 | 149;239;494 |
| 200 | 210;211 |       | 96       | 1335 | 1326;1329 |        | 1324        |
| 201 |         |       |          |      |           |        |             |
| 202 |         |       |          |      |           |        |             |
| 203 |         |       | 97       |      |           |        | 172         |

|     | BL | BM | BN                        | BO | BP | BQ  | BR                       |
|-----|----|----|---------------------------|----|----|-----|--------------------------|
| 204 |    | 38 | 98;99;100;101;102;103;104 | 17 |    | 17  | 16;44;47;153;190;305;325 |
| 205 |    | 39 | 105;106                   |    |    | 20  | 56;114                   |
| 206 |    |    |                           |    |    |     |                          |
| 207 |    |    |                           |    |    |     |                          |
| 208 |    | 40 | 107                       |    |    | 555 | 61                       |

|     | BL | BM | BN                                 | BO | BP | BQ | BR                           |
|-----|----|----|------------------------------------|----|----|----|------------------------------|
| 209 |    |    | 99;100;101;<br>102;103;104<br>;108 | 17 |    |    | 16;44;47;153;<br>190;305;325 |
| 210 |    |    | 99;101;102;<br>103                 |    |    |    | 46;49;192;32<br>7            |
| 211 |    |    | 109;110;111<br>;112                |    |    |    | 73;164;257;3<br>30           |
| 212 |    |    |                                    |    |    |    |                              |

|     | BL     | BM | BN                      | BO   | BP        | BQ  | BR                     |
|-----|--------|----|-------------------------|------|-----------|-----|------------------------|
| 213 |        |    | 113                     |      |           |     | 744                    |
| 214 |        |    | 110;111;112<br>;114;115 |      |           |     | 73;164;257;3<br>30;363 |
| 215 |        |    |                         |      |           |     |                        |
| 216 |        |    |                         |      |           |     |                        |
| 217 |        |    |                         |      |           |     |                        |
| 218 |        |    |                         |      |           |     |                        |
| 219 |        |    |                         |      |           |     |                        |
| 220 | 212    | 41 |                         | 548  | 546       | 545 |                        |
| 221 | 94;213 |    |                         | 1113 | 1109;1111 |     |                        |

|     | BL    | BM | BN  | BO  | BP      | BQ      | BR  |
|-----|-------|----|-----|-----|---------|---------|-----|
| 222 | 214   |    |     | 176 | 181     |         |     |
| 223 | 215   |    |     |     | 62      |         |     |
| 224 |       |    |     |     |         |         |     |
| 225 | 95;96 |    |     |     | 587;591 |         |     |
| 226 |       |    |     |     |         |         |     |
| 227 |       |    | 116 | 451 |         |         | 449 |
| 228 | 97    |    |     |     | 450     |         |     |
| 229 | 42;43 |    |     | 570 |         | 577;582 |     |

|     | BL         | BM | BN  | BO  | BP       | BQ  | BR   |
|-----|------------|----|-----|-----|----------|-----|------|
| 230 |            |    |     | 478 |          |     |      |
| 231 | 216        |    | 117 |     | 94       |     | 90   |
| 232 | 217        |    |     | 269 | 272      |     |      |
| 233 | 98;218;219 |    |     |     | 79;83;85 |     |      |
| 234 | 99;220     | 44 |     |     | 536;541  | 534 |      |
| 235 |            |    |     |     |          |     |      |
| 236 |            | 45 | 118 |     |          | 828 | 1000 |
| 237 |            |    |     |     |          |     |      |
| 238 |            |    |     |     |          |     |      |

|     | BL          | BM | BN       | BO      | BP          | BQ | BR          |
|-----|-------------|----|----------|---------|-------------|----|-------------|
| 239 |             |    | 32;33;34 | 373;395 |             |    | 243;278;397 |
| 240 |             |    |          |         |             |    |             |
| 241 | 221         |    | 119      |         | 335         |    | 332         |
| 242 |             |    |          | 80      |             |    |             |
| 243 |             | 46 | 120      |         |             | 63 | 274         |
| 244 | 222         |    |          |         | 353         |    |             |
| 245 |             |    |          |         |             |    |             |
| 246 |             | 47 |          |         |             | 25 |             |
| 247 | 100;101;223 |    |          |         | 173;175;177 |    |             |
| 248 | 102         |    |          |         | 145         |    |             |

|     | BL      | BM | BN  | BO      | BP        | BQ   | BR   |
|-----|---------|----|-----|---------|-----------|------|------|
| 249 | 224;225 |    |     |         | 1292;1293 |      |      |
| 250 |         |    |     |         |           |      |      |
| 251 | 103;226 |    | 121 |         | 1503;1504 |      | 1497 |
| 252 | 227     | 48 | 122 | 438;443 | 1245      | 1240 | 437  |
| 253 |         |    |     |         |           |      |      |
| 254 | 228     |    | 123 |         | 8         |      | 10   |
| 255 | 104     | 49 |     |         | 1090      | 1087 |      |
| 256 | 105     |    |     |         | 172       |      |      |
| 257 |         |    |     |         |           |      |      |



|     | BL          | BM | BN                 | BO      | BP     | BQ  | BR                |
|-----|-------------|----|--------------------|---------|--------|-----|-------------------|
| 258 | 106;107;229 |    | 124                |         | 6;9;10 |     | 1                 |
| 259 |             |    | 99;102;103;<br>104 |         |        |     | 45;48;154;19<br>1 |
| 260 |             | 50 | 125                |         |        | 232 | 227               |
| 261 |             |    |                    |         |        |     |                   |
| 262 |             |    |                    | 652;655 |        |     |                   |
| 263 |             |    |                    |         |        |     |                   |
| 264 |             |    |                    |         |        |     |                   |
| 265 | 108         | 51 | 126                | 501     | 503    | 499 | 497               |

|     | BL          | BM    | BN | BO      | BP          | BQ      | BR |
|-----|-------------|-------|----|---------|-------------|---------|----|
| 266 | 109         | 52;53 |    | 48      | 45          | 53;56   |    |
| 267 |             |       |    | 249     |             |         |    |
| 268 | 110;111;112 |       |    |         | 370;372;376 |         |    |
| 269 | 113;230;231 | 54    |    |         | 206;208;210 | 214     |    |
| 270 | 232;233     |       |    | 168     | 169;170     |         |    |
| 271 | 114         | 55;56 |    | 306;310 | 313         | 306;310 |    |
| 272 |             | 57;58 |    |         |             | 608;609 |    |
| 273 | 234         | 59    |    |         | 607         | 611     |    |
| 274 | 235         |       |    |         | 530         |         |    |
| 275 |             |       |    |         |             |         |    |

|     | BL      | BM    | BN      | BO  | BP      | BQ    | BR      |
|-----|---------|-------|---------|-----|---------|-------|---------|
| 276 |         | 60;61 |         |     |         | 33;35 |         |
| 277 | 115     | 62    |         | 474 | 476     | 473   |         |
| 278 |         |       |         |     |         |       |         |
| 279 |         |       |         |     |         |       |         |
| 280 |         |       |         |     |         |       |         |
| 281 |         |       | 127     |     |         |       | 627     |
| 282 |         |       |         |     |         |       |         |
| 283 | 116;236 |       |         |     | 297;299 |       |         |
| 284 |         |       |         | 420 |         |       |         |
| 285 |         |       |         |     |         |       |         |
| 286 | 237     |       | 128;129 |     | 255     |       | 253;264 |

|     | BL          | BM    | BN  | BO  | BP          | BQ      | BR  |
|-----|-------------|-------|-----|-----|-------------|---------|-----|
| 287 |             |       | 130 |     |             |         | 462 |
| 288 | 238;239     |       |     |     | 8;10        |         |     |
| 289 | 117         | 63    |     |     | 613         | 605     |     |
| 290 | 240;241     | 64    |     |     | 577;579     | 568     |     |
| 291 |             |       |     |     |             |         |     |
| 292 | 242         | 65    |     |     | 81          | 84      |     |
| 293 | 118;119;243 | 66    |     |     | 506;512;514 | 508     |     |
| 294 | 120         | 67;68 |     | 178 | 172         | 179;180 |     |
| 295 |             |       | 131 |     |             |         | 1   |
| 296 |             |       |     |     |             |         |     |

|     | BL      | BM | BN      | BO  | BP      | BQ  | BR      |
|-----|---------|----|---------|-----|---------|-----|---------|
| 297 | 244;245 |    |         |     | 241;242 |     |         |
| 298 |         |    |         |     |         |     |         |
| 299 |         |    |         |     |         |     |         |
| 300 | 246     |    |         | 313 | 314     |     |         |
| 301 |         |    |         |     |         |     |         |
| 302 | 247     | 69 |         |     | 159     | 160 |         |
| 303 |         |    |         |     |         |     |         |
| 304 | 121     | 70 |         |     | 648     | 654 |         |
| 305 |         |    | 132;133 |     |         |     | 340;437 |
| 306 |         |    |         |     |         |     |         |

|     | BL                  | BM | BN      | BO  | BP                  | BQ  | BR  |
|-----|---------------------|----|---------|-----|---------------------|-----|-----|
| 307 |                     |    |         |     |                     |     |     |
| 308 | 122                 |    |         | 129 | 124                 |     |     |
| 309 |                     |    |         |     |                     |     |     |
| 310 |                     |    |         | 32  |                     |     |     |
| 311 |                     |    | 134     |     |                     |     | 866 |
| 312 | 248;249;250;<br>251 |    |         |     | 649;654;655;65<br>8 |     |     |
| 313 | 123                 |    |         |     | 342                 |     |     |
| 314 |                     |    |         |     |                     |     |     |
| 315 | 252                 |    |         | 212 | 208                 |     |     |
| 316 | 124                 | 71 | 148;151 |     | 141                 | 139 |     |
| 317 |                     |    |         |     |                     |     |     |

|     | BL  | BM | BN      | BO  | BP | BQ | BR      |
|-----|-----|----|---------|-----|----|----|---------|
| 318 |     |    |         |     |    |    |         |
| 319 |     |    |         | 258 |    |    |         |
| 320 |     |    |         |     |    |    |         |
| 321 | 125 |    |         |     | 77 |    |         |
| 322 |     |    | 135;136 | 392 |    |    | 389;390 |
| 323 | 126 |    |         |     | 25 |    |         |
| 324 | 253 |    | 137     | 57  | 56 |    | 52      |

|     | BL  | BM | BN  | BO  | BP  | BQ | BR  |
|-----|-----|----|-----|-----|-----|----|-----|
| 325 | 254 |    | 138 | 266 | 271 |    | 270 |
| 326 |     |    |     |     |     |    |     |
| 327 |     |    |     | 651 |     |    |     |
| 328 |     |    | 139 |     |     |    | 438 |
| 329 |     | 72 | 140 |     |     | 14 | 1   |
| 330 | 127 |    |     |     | 3   |    |     |



|     | BL  | BM | BN | BO  | BP  | BQ | BR |
|-----|-----|----|----|-----|-----|----|----|
| 331 |     |    |    | 207 |     |    |    |
| 332 |     |    |    | 220 |     |    |    |
| 333 |     |    |    |     |     |    |    |
| 334 | 128 |    |    |     | 375 |    |    |
| 335 |     |    |    |     |     |    |    |

|     | BL          | BM | BN  | BO   | BP       | BQ | BR |
|-----|-------------|----|-----|------|----------|----|----|
| 336 |             |    |     |      |          |    |    |
| 337 |             |    |     | 1552 |          |    |    |
| 338 |             |    |     |      |          |    |    |
| 339 |             |    | 141 |      |          |    | 32 |
| 340 |             | 73 |     |      |          | 9  |    |
| 341 | 255;256;257 |    |     |      | 39;40;49 |    |    |

|     | BL      | BM | BN  | BO  | BP      | BQ  | BR  |
|-----|---------|----|-----|-----|---------|-----|-----|
| 342 |         |    |     | 420 |         |     |     |
| 343 |         | 74 |     | 414 |         | 428 |     |
| 344 |         |    |     |     |         |     |     |
| 345 | 129;130 |    | 142 |     | 340;344 |     | 339 |
| 346 |         |    |     |     |         |     |     |
| 347 |         |    |     |     |         |     |     |
| 348 |         |    |     |     |         |     |     |

|     | BL      | BM | BN | BO | BP      | BQ | BR |
|-----|---------|----|----|----|---------|----|----|
| 349 | 131;258 |    |    |    | 260;261 |    |    |
